# Supplementary material for: Prediction of gastric cancer by machine learning integrated with mass spectrometry-based N-glycomics
Source: Royal Society of Chemistry journal article supplement (doi:10.1039/d2an02057b), 2023-01-01
Supplement: d2an02057b1.xlsx [file d2an02057b1.xlsx]

## Sheet: Table S1
Table S1. Demographic characteristics of the individuals used in the study.
No	Age	Sex	Grade	Stage
1	70	male	2	3
2	60	male	2	3
3	53	male	2	3
4	68	male	3	3
5	41	female	2	3
6	90	male	2	3
7	78	male	2	3
8	54	male	3	3
9	61	male	3	2
10	83	male	3	4
11	64	male	3	4
12	70	male	3	3
13	57	male	3	4
14	66	male	3	4
15	58	male	3	4
16	57	male	2	4
17	57	male	3	3
18	70	female	3	3
19	72	female	3	4
20	61	male	2	3
21	63	male	3	3
22	44	male	3	4
23	78	male	2	4
24	83	male	3	4
25	70	male	3	4
26	68	male	3	2
27	68	female	3	4
28	27	female	3	1
29	58	male	3	3
30	71	female	2	3
31	71	female	3	3
32	78	female	2	3
33	86	female	3	4
Average	65.303		2.66667	3.27273
Standart Dev.	12.9626		0.471405	0.70808

## Sheet: Table S2
Table S2. The identified N-glycans from gastric cancer and adjecent control tissues by MALDI-MS.
No	Composition	m/z measured	z	m/z calculated	Δ MH+ [Da]	Δ m/z [ppm]	Score	FragCov. [%] in MS/MS analysis
1	H3N2-AA	1030.4	-1	1030.37	0.0262	25.41	43.1	39
2	H3N2F1-AA	1176.45	-1	1176.43	0.0155	13.2	43.1	39
3	H4N2-AA	1192.43	-1	1192.43	0.0016	1.3
4	H3N3-AA	1233.45	-1	1233.45	0.0013	1.07	44.4	32
5	H4N2F1-AA	1338.47	-1	1338.48	-0.0153	-11.45	21.2	9
6	H5N2-AA	1354.48	-1	1354.48	-0.0003	-0.23	48.7	37
7	H3N3F1-AA	1379.51	-1	1379.51	-0.0007	-0.52	49.6	31
8	H4N3-AA	1395.5	-1	1395.51	-0.0079	-5.66	44	40
9	H3N4-AA	1436.51	-1	1436.53	-0.0254	-17.71	38.5	40
10	H6N2-AA	1516.53	-1	1516.53	-0.0055	-3.63	61.8	56
11	H4N3F1-AA	1541.56	-1	1541.56	-0.0049	-3.2	46	30
12	H5N3-AA	1557.55	-1	1557.56	-0.0121	-7.75
13	H3N4F1-AA	1582.59	-1	1582.59	0.0021	1.3	50	37
14	H4N4-AA	1598.61	-1	1598.58	0.0261	16.33	44	27
15	H3N5-AA	1639.6	-1	1639.61	-0.0129	-7.86	33.3	26
16	H7N2-AA	1678.58	-1	1678.58	-0.0081	-4.83	54.2	46
17	H4N3S1-AA	1686.59	-1	1686.6	-0.0072	-4.24	39.2	26
18	H5N3F1-AA	1703.59	-1	1703.62	-0.027	-15.83
19	H6N3-AA	1719.6	-1	1719.61	-0.009	-5.21
20	H3N4S1-AA	1728.64	-1	1728.64	0.0021	1.24
21	H4N4F1-AA	1744.64	-1	1744.64	-0.0037	-2.15	53	38
22	H5N4-AA	1760.64	-1	1760.64	-0.0014	-0.82	47.9	40
23	H3N5F1-AA	1785.66	-1	1785.67	-0.0066	-3.67	53.2	42
24	H4N5-AA	1801.66	-1	1801.66	-0.0063	-3.5
25	H8N2-AA	1840.63	-1	1840.64	-0.0099	-5.35	69.6	74
26	H5N3S1-AA	1848.64	-1	1848.65	-0.0129	-6.96
27	H5N4F1-AA	1906.7	-1	1906.7	0.0023	1.21	56.3	46
28	H4N5F1-AA	1947.72	-1	1947.72	-0.0007	-0.35	53.8	39
29	H5N5-AA	1963.7	-1	1963.72	-0.0127	-6.46
30	H5N4S1F1-AA	1986.65	-1	1986.65	0.002	1.01	15.4	7
31	H9N2-AA	2002.69	-1	2002.69	0.001	0.52	40.6	24
32	H4N5S1F1-AA	2027.72	-1	2027.68	0.0431	21.26
33	H5N4S1-AA	2051.73	-1	2051.73	-0.0047	-2.28	40.4	21
34	H4N5F2-AA	2093.79	-1	2093.78	0.0114	5.45	33.9	23
35	H5N5F1-AA	2109.78	-1	2109.77	0.0077	3.64	50.4	34
36	H6N5-AA	2125.78	-1	2125.77	0.011	5.2
37	H4N6F1-AA	2150.83	-1	2150.8	0.0265	12.33
38	H10N2-AA	2164.78	-1	2164.74	0.0383	17.7
39	H5N6-AA	2166.81	-1	2166.8	0.0148	6.85
40	H5N4S1F1-AA	2197.79	-1	2197.79	-0.0003	-0.15	40.2	18
41	H5N5S1-AA	2255.82	-1	2255.82	-0.0019	-0.83	22.3	9
42	H6N5F1-AA	2271.85	-1	2271.83	0.0242	10.63	49.6	37
43	H3N6S1F1-AA	2280.88	-1	2280.85	0.0235	10.3
44	H5N6F1-AA	2312.88	-1	2312.85	0.0222	9.58	25.1	14
45	H5N5S1F1-AA	2400.89	-1	2400.87	0.0167	6.96
46	H6N5S1-AA	2416.86	-1	2416.87	-0.0042	-1.73	28.6	13
47	H5N6F2-AA	2458.93	-1	2458.91	0.0158	6.44
48	H6N6F1-AA	2474.93	-1	2474.91	0.0208	8.41	55.1	39
49	H7N6-AA	2490.93	-1	2490.9	0.0282	11.3
50	H6N5S1F1-AA	2562.92	-1	2562.92	0.0011	0.43	33.1	23
51	H7N6F1-AA	2636.97	-1	2636.96	0.0145	5.51	46.1	42
52	H6N7F1-AA	2678	-1	2677.99	0.0111	4.16
53	H7N6F2-AA	2783.02	-1	2783.02	0.0062	2.24
54	H7N7F1-AA	2840.04	-1	2840.04	0.0044	1.55
55	H7N6S1F1-AA	2928.04	-1	2928.06	-0.0196	-6.68	12.1	3
56	H6N5S3-AA	2999	-1	2999.06	-0.0534	-17.8
57	H8N7F1-AA	3002.09	-1	3002.09	-0.0042	-1.41	13.7	15
58	H9N8F1-AA	3367.22	-1	3367.22	-0.0059	-1.75	14.2	11
59	H10N9F1-AA	3732.27	-1	3732.36	-0.0891	-23.88

## Sheet: Table S3
Table S3. Mann-Whitney test and AUC results of differentially expressed N-glycans between cancer cases and controls.
	Glycans	Discovery?	P value	Mean rank of Cancer	Mean rank of Control	Mean rank diff.	Mann-Whitney U	q value	Regulation	AUC
1	H3N2	No	0.080422	129.2	121.6	7.524	7338	0.109115
2	H3N2F1	Yes	0.000155	138.8	111.5	27.26	6105	0.000575	Up	0.6091
3	H4N2	No	0.008081	132.4	118.2	14.22	6920	0.019532
4	H3N3	No	0.413156	127.9	123	4.947	7499	0.390653
5	H4N2F1	No	0.063605	130.9	119.9	11	7121	0.091181
6	H5N2	No	0.798931	126.4	124.6	1.745	7699	0.657491
7	H3N3F1	No	0.965054	125.6	125.4	0.1441	7799	0.748075
8	H4N3	No	0.242213	129.3	121.5	7.804	7321	0.243939
9	H3N4	No	0.959708	125.7	125.3	0.4002	7783	0.748075
10	H6N2	No	0.028405	133.7	116.9	16.81	6758	0.046752
11	H4N3F1	Yes	0.000933	138.1	112.3	25.79	6197	0.002764	Up	0.6032
12	H5N3	No	0.010923	134.8	115.8	19	6621	0.022064
13	H3N4F1	Yes	<0.000001	101	151.2	-50.22	4671	<0.000001	Down	0.7009
14	H4N4	No	0.733644	126.7	124.3	2.361	7661	0.626983
15	H3N5	Yes	3.9e-05	111.3	140.5	-29.2	5984	0.000192
16	H7N2	No	0.009314	134.8	115.8	19.01	6621	0.020696
17	H4N3S1	No	0.091198	132	118.7	13.32	6976	0.114191
18	H5N3F1	No	0.009965	134	116.6	17.45	6718	0.021088
19	H6N3	No	0.565088	126.7	124.2	2.481	7653	0.502251
20	H3N4S1	No	0.43393	128.5	122.3	6.196	7421	0.401747
21	H4N4F1	Yes	<0.000001	100.8	151.4	-50.66	4644	<0.000001	Down	0.7026
22	H5N4	No	0.753661	124.1	127	-2.866	7629	0.631938
23	H3N5F1	Yes	<0.000001	94.02	158.5	-64.5	3779	<0.000001	Down	0.758
24	H4N5	No	0.993169	125.5	125.5	0.04803	7805	0.748075
25	H8N2	No	0.082787	118.8	132.5	-13.75	6949	0.109115
26	H5N3S1	No	0.981603	125.4	125.6	-0.1761	7797	0.748075
27	H5N4F1	No	0.613099	123.2	127.9	-4.627	7519	0.534237
28	H4N5F1	Yes	<0.000001	98.91	153.4	-54.5	4404	<0.000001	Down	0.718
29	H5N5	No	0.008351	135.6	114.9	20.77	6511	0.019532
30	H5N4S1F1	No	0.046967	117	134.4	-17.47	6717	0.071972
31	H9N2	No	0.154012	119.7	131.5	-11.8	7071	0.171107
32	H4N5S1F1	No	0.220829	122.1	129.1	-6.996	7371	0.233658
33	H5N4S1	No	0.126168	119	132.3	-13.26	6980	0.143766
34	H4N5F2	No	0.061756	121.6	129.6	-8.045	7306	0.091181
35	H5N5F1	No	0.215286	120.4	130.9	-10.48	7154	0.233349
36	H6N5	No	0.01534	135.9	114.6	21.32	6476	0.028629
37	H4N6F1	No	0.866196	125.2	125.8	-0.6804	7766	0.699886
38	H10N2	No	0.092504	129	121.9	7.076	7366	0.114191
39	H5N6	No	0.120776	130	120.8	9.125	7238	0.141244
40	H5N4S1F1	No	0.046967	117	134.4	-17.47	6717	0.071972
41	H5N5S1	No	0.234957	129.6	121.2	8.373	7285	0.242825
42	H6N5F1	Yes	2e-05	144.1	106	38.16	5425	0.000112	Up	0.6526
43	H3N6S1F1	Yes	0.000384	117.4	134	-16.59	6772	0.001219	Down	0.5663
44	H5N6F1	No	0.02685	130.1	120.6	9.525	7213	0.045892
45	H5N5S1F1	No	0.015461	116.5	135	-18.5	6653	0.028629
46	H6N5S1	No	0.110491	130.8	120	10.82	7132	0.132708
47	H5N6F2	No	0.497795	127.4	123.5	3.986	7559	0.45147
48	H6N6F1	Yes	0.000228	136.9	113.5	23.44	6344	0.000778	Up	0.5938
49	H7N6	No	0.083481	130.3	120.5	9.758	7199	0.109115
50	H6N5S1F1	No	0.247013	120.7	130.5	-9.862	7192	0.243939
51	H7N6F1	Yes	<0.000001	155.8	93.68	62.16	3926	<0.000001	Up	0.7486
52	H6N7F1	No	0.016404	134.3	116.2	18.07	6679	0.02916
53	H7N6F2	No	0.005968	135.1	115.4	19.74	6575	0.016577
54	H7N7F1	Yes	8.7e-05	138.8	111.6	27.17	6111	0.000385	Up	0.6087
55	H7N6S1F1	No	0.29022	129.3	121.5	7.813	7320	0.280378
56	H6N5S3	Yes	0.0001	135.3	115.2	20.06	6555	0.000404	Up	0.5802
57	H8N7F1	Yes	3e-06	138.5	111.8	26.72	6139	2.1e-05	Up	0.6069
58	H9N8F1	No	0.006746	134.4	116.2	18.23	6669	0.017635
59	H10N9F1	Yes	6e-06	142.7	107.4	35.32	5602	3.9e-05	Up	0.6413
	Test details
	Test name	Mann-Whitney test
	Comparison for each test	Compare ranks
	Multiple comparisons	False Discovery Rate (FDR)
	Method	Two-stage step-up (Benjamini, Krieger, and Yekutieli)
	Desired FDR (Q)	0.01
	Number of tests performed	59

## Sheet: Table S4
Table S4. Relative areas of whole N-glycan dataset.
Y	H3N2	H3N2F1	H4N2	H3N3	H4N2F1	H5N2	H3N3F1	H4N3	H3N4	H6N2	H4N3F1	H5N3	H3N4F1	H4N4	H3N5	H7N2	H4N3S1	H5N3F1	H6N3	H3N4S1	H4N4F1	H5N4	H3N5F1	H4N5	H8N2	H5N3S1	H5N4F1	H4N5F1	H5N5	H5N4S1F1	H9N2	H4N5S1F1	H5N4S1	H4N5F2	H5N5F1	H6N5	H4N6F1	H10N2	H5N6	H5N4S1F1_1	H5N5S1	H6N5F1	H3N6S1F1	H5N6F1	H5N5S1F1	H6N5S1	H5N6F2	H6N6F1	H7N6
1	0.0041195	0.00636242	0.00478038	0.00491192	0.00621466	0.0104352	0.00789839	0.00796186	0.00675506	0.0137241	0.0107417	0.00820119	0.0163704	0.00842868	0.00701304	0.0123809	0.00731411	0.00822615	0.0094353	0.00806445	0.0255601	0.0380385	0.0125596	0.00911253	0.0160432	0.00845167	0.181598	0.0289323	0.00999192	0.0450855	0.0160196	0.0137608	0.0223452	0.0122961	0.0216072	0.0123897	0.00999366	0.00995401	0.00917117	0.0450855	0.0131191	0.0425385	0.0132444	0.0143983	0.0122338	0.012338	0.0105682	0.0130435	0.0104994
1	0.00693899	0.00849626	0.00768194	0.00778527	0.0102196	0.0126898	0.0113722	0.0110944	0.0104428	0.0144532	0.0126645	0.0110919	0.0155142	0.0112719	0.010325	0.013917	0.0106473	0.0113124	0.0120325	0.0110673	0.0210849	0.0287137	0.0139599	0.0117444	0.0160596	0.0114017	0.111759	0.02361	0.0123707	0.0341319	0.0163216	0.016383	0.0199437	0.0136492	0.0194763	0.0140507	0.012295	0.012343	0.0118643	0.0341319	0.015869	0.0339762	0.0160453	0.0166964	0.0152984	0.0150461	0.0142061	0.0159403	0.0139326
1	0.00161651	0.00379451	0.00269326	0.00226245	0.00277099	0.00763388	0.00571314	0.00554304	0.00335345	0.0131355	0.0112597	0.00588162	0.0160739	0.00631336	0.00410412	0.0115444	0.00446199	0.00613353	0.00788394	0.00583809	0.0292434	0.0495616	0.0131754	0.00658389	0.0168065	0.0054738	0.250447	0.0315932	0.00883854	0.0488497	0.0160322	0.0101615	0.0229975	0.00984213	0.0217775	0.0113455	0.00714886	0.00765507	0.00665979	0.0488497	0.0107344	0.0518137	0.00971837	0.0115821	0.00846047	0.00900089	0.00711723	0.0105303	0.00674175
1	0.00163698	0.00451363	0.00219609	0.00221226	0.00243743	0.00848329	0.00645942	0.00541209	0.00330096	0.0130466	0.0115046	0.00545835	0.0163351	0.00589029	0.00368052	0.0104207	0.00400413	0.00555369	0.0065325	0.00480268	0.028544	0.0472643	0.0146852	0.00638687	0.0136045	0.00474351	0.241763	0.0318281	0.0104217	0.0646487	0.0142077	0.0104828	0.0258257	0.00929616	0.0220209	0.0103902	0.00699899	0.00704817	0.00593338	0.0646487	0.0108486	0.0481673	0.00970105	0.011479	0.00874189	0.00922549	0.00651386	0.00956953	0.00660328
1	0.00371665	0.0104904	0.00560414	0.00437471	0.00454052	0.0244886	0.00927733	0.00687443	0.00509275	0.0258612	0.0129725	0.00595921	0.0267348	0.00885714	0.00592903	0.0233361	0.00830011	0.00708163	0.00771672	0.0075731	0.0287921	0.0604941	0.0213172	0.00846229	0.0235843	0.00699055	0.102625	0.0334287	0.00896218	0.032614	0.0151869	0.0139264	0.0636056	0.0165993	0.033199	0.0106841	0.00940465	0.00814614	0.00731611	0.032614	0.0176439	0.026884	0.0134547	0.0139827	0.0142693	0.0145477	0.0110117	0.0166917	0.00833367
1	0.00223288	0.0072749	0.00362732	0.00276098	0.00265023	0.0170689	0.00659803	0.00453186	0.00329101	0.0208753	0.0104	0.00423359	0.0243321	0.00729471	0.00461117	0.0203232	0.00635846	0.00546607	0.00627068	0.00638567	0.0287639	0.0591979	0.0210823	0.00756354	0.0235768	0.00606387	0.111197	0.0348324	0.00854058	0.0373694	0.0158809	0.0150031	0.0711546	0.0183717	0.0396674	0.0107044	0.00976392	0.00818786	0.00725016	0.0373694	0.0191662	0.0319538	0.0146346	0.0146855	0.0151015	0.015096	0.0110545	0.0186111	0.00758992
1	0.0016761	0.00540186	0.00233232	0.00183608	0.00152108	0.0187188	0.00818621	0.00403934	0.00239196	0.0251336	0.0143284	0.00346791	0.026987	0.00695269	0.00392545	0.0214057	0.00577917	0.00629796	0.00549834	0.00576948	0.0307558	0.0624487	0.0254547	0.00679988	0.0231086	0.00477655	0.112654	0.0358245	0.00883644	0.0346378	0.0181287	0.0116102	0.0723334	0.0208813	0.0471495	0.0107797	0.00905872	0.00726738	0.00641498	0.0346378	0.0157287	0.0379271	0.0116599	0.0145624	0.0123372	0.0125356	0.0108897	0.0212331	0.00636616
1	0.00179089	0.00605252	0.00236473	0.00165912	0.00130555	0.0186798	0.00751283	0.00364769	0.0019953	0.0219595	0.0121308	0.00294252	0.0233754	0.00556065	0.00309655	0.018076	0.00480253	0.00488009	0.00449451	0.00462881	0.0280596	0.0618353	0.0221583	0.00584501	0.0201538	0.00357557	0.118017	0.0366304	0.00782471	0.0415931	0.0162783	0.0111478	0.0800956	0.0199691	0.0511418	0.010505	0.00813661	0.0061568	0.00533137	0.0415931	0.0156564	0.0400514	0.0104427	0.0140993	0.0134601	0.0132322	0.0105449	0.0219634	0.00596421
1	0.00339189	0.00457793	0.00377847	0.00437032	0.00406609	0.0147543	0.00969706	0.0090217	0.00693998	0.0154436	0.0174225	0.00707129	0.019668	0.0147138	0.00533782	0.0154316	0.00485834	0.00677916	0.00944915	0.00560505	0.0486339	0.0936985	0.0109483	0.00842997	0.0221019	0.00651206	0.224997	0.0282161	0.0108228	0.00620341	0.0162317	0.00660886	0.0095458	0.00716841	0.0294777	0.0223053	0.00634569	0.0063852	0.00576803	0.00620341	0.0100738	0.0711207	0.00888006	0.00971067	0.00669676	0.00805326	0.00627246	0.0119317	0.0103566
1	0.00257748	0.00428632	0.00311719	0.00406679	0.00282574	0.0118017	0.00963149	0.0106022	0.00572096	0.0162375	0.0191362	0.00621677	0.0168835	0.0205035	0.00518536	0.0169094	0.00373805	0.0060581	0.00978837	0.0045224	0.0441783	0.149868	0.0120914	0.00856574	0.0241134	0.00583186	0.191363	0.0191919	0.0138958	0.00450119	0.0171545	0.00519629	0.00799407	0.00549543	0.0324893	0.0373752	0.00648234	0.0061211	0.00543716	0.00450119	0.00884336	0.0639065	0.00804364	0.00873969	0.00460326	0.00698412	0.00550899	0.0132608	0.013768
1	0.00337045	0.00476035	0.00364685	0.00460287	0.00326956	0.0121663	0.0101002	0.0106063	0.00559074	0.0160832	0.018945	0.00636429	0.0144469	0.0178879	0.00518918	0.016413	0.00412926	0.00702531	0.00926731	0.00444424	0.0374632	0.133533	0.0215179	0.00900043	0.0243093	0.00561746	0.177353	0.0171196	0.0157855	0.00506439	0.0165892	0.00561849	0.007855	0.00584963	0.0289267	0.0365348	0.00870981	0.00710751	0.00645813	0.00506439	0.00912988	0.0642123	0.00808024	0.0092831	0.00512982	0.00754242	0.00591628	0.0142227	0.0158334
1	0.00309558	0.00441387	0.0034234	0.00426339	0.00309758	0.0115842	0.00957264	0.0101127	0.00538724	0.0159955	0.0183996	0.00626143	0.0144353	0.0175737	0.00539155	0.0162531	0.00428418	0.00694867	0.00903175	0.00452984	0.0377919	0.133955	0.0230197	0.00924502	0.0236628	0.00584716	0.182081	0.01809	0.0164934	0.00538157	0.0179021	0.0058214	0.00819159	0.00611407	0.0297285	0.036869	0.00918949	0.00741894	0.0067313	0.00538157	0.00924634	0.0624222	0.00873156	0.00935127	0.0052137	0.00742075	0.00587062	0.0137815	0.0154568
1	0.00339761	0.00691061	0.0045571	0.00419033	0.00427916	0.021012	0.0119813	0.00776613	0.00615047	0.019081	0.0154669	0.00673023	0.0241554	0.0106445	0.008382	0.0168369	0.00705061	0.00667286	0.00778119	0.0065664	0.0399625	0.0459872	0.0154268	0.0079845	0.0183215	0.00719537	0.147091	0.0233156	0.00871327	0.0646555	0.0160271	0.0112318	0.0457764	0.00917052	0.0257725	0.0114658	0.00787693	0.00735664	0.00708155	0.0646555	0.0146859	0.0328916	0.00989231	0.00910346	0.0143108	0.0129862	0.0072182	0.0101291	0.00801227
1	0.00260614	0.00525347	0.00317485	0.00307597	0.00316347	0.0183297	0.00974906	0.00623846	0.00477127	0.0183691	0.0136396	0.00547406	0.0228989	0.00928094	0.00668271	0.0162794	0.00566585	0.00530124	0.00665771	0.00500316	0.0404458	0.0455472	0.0139954	0.00640123	0.01834	0.00570901	0.163163	0.0237134	0.00721308	0.0766952	0.0156089	0.0104887	0.0501573	0.00790026	0.0273908	0.0101123	0.00659166	0.00622135	0.00562931	0.0766952	0.013661	0.0374851	0.00864487	0.00801265	0.0150636	0.0124117	0.00612197	0.00946371	0.00714313
1	0.000961231	0.00239292	0.00151399	0.00123156	0.00131743	0.00644297	0.00566902	0.00277488	0.00211375	0.00651475	0.00819304	0.00327614	0.0101909	0.00476671	0.00354648	0.00708779	0.00314311	0.00443239	0.00469606	0.00366603	0.0246826	0.0270891	0.0151467	0.00664351	0.0106774	0.00405229	0.13311	0.0223598	0.01746	0.0830635	0.0133247	0.0147402	0.0419962	0.0113853	0.0350826	0.0130818	0.0102935	0.0105199	0.00979456	0.0830635	0.0258968	0.048918	0.0131955	0.0125052	0.0200522	0.0171306	0.00996893	0.0151153	0.0100713
1	0.000836307	0.00238206	0.00129633	0.00117872	0.00108072	0.00751506	0.00659402	0.00240149	0.00195199	0.0088262	0.0101217	0.00243196	0.0157504	0.00482467	0.00336234	0.00913103	0.00283886	0.00463069	0.00354184	0.00281829	0.0354111	0.0303151	0.0162442	0.00462348	0.0121487	0.00305756	0.179195	0.0242896	0.0115469	0.104642	0.0128393	0.0114905	0.0463619	0.0079024	0.0341888	0.00919621	0.00571273	0.00650128	0.00549975	0.104642	0.0221753	0.0508371	0.00972625	0.00764789	0.0181407	0.0121107	0.00584389	0.0105638	0.00537277
1	0.00882514	0.0063628	0.00546821	0.00624147	0.00365372	0.0285122	0.00863058	0.0104341	0.012271	0.023883	0.0126025	0.00700766	0.0132889	0.0156468	0.0236327	0.0237098	0.00665021	0.00562917	0.00891551	0.00512276	0.0250278	0.0536837	0.0106801	0.0327862	0.0346921	0.00631709	0.116602	0.0144885	0.0408184	0.0353565	0.0267985	0.00895253	0.041246	0.00872838	0.0157207	0.0165274	0.00632039	0.015029	0.017564	0.0353565	0.0176305	0.0306461	0.00828882	0.00789969	0.0091049	0.0128772	0.00758613	0.00822503	0.0111446
1	0.00851083	0.0058601	0.00479804	0.00565702	0.00278164	0.0276025	0.00729681	0.00918153	0.0108678	0.0233372	0.0112812	0.00634741	0.0125656	0.0142175	0.0214731	0.0235833	0.00590748	0.00473342	0.00806907	0.00407444	0.0239911	0.0526719	0.0100277	0.0296023	0.0369802	0.00559887	0.123823	0.0140411	0.0384718	0.0400726	0.0271872	0.00855268	0.0452898	0.00860758	0.0162253	0.016468	0.00546318	0.0140552	0.0166501	0.0400726	0.0176177	0.0337047	0.00823318	0.00702348	0.00904169	0.0137334	0.00714952	0.00818298	0.0115403
1	0.0087066	0.00592447	0.00556452	0.00496823	0.0034658	0.0224032	0.0106258	0.0086633	0.00926426	0.0182788	0.0131293	0.00629927	0.0103547	0.0122917	0.0159224	0.0182636	0.00629301	0.00781839	0.00835539	0.00524875	0.0203284	0.0419553	0.0158174	0.024636	0.0291022	0.0068557	0.100078	0.0151707	0.0390978	0.0369082	0.024602	0.0127373	0.0376225	0.0109812	0.0193149	0.0187178	0.00983449	0.0161376	0.01804	0.0369082	0.0215934	0.0348149	0.0146679	0.0112439	0.0126878	0.0158454	0.0102124	0.0118603	0.0143278
1	0.00744079	0.00539123	0.00507505	0.00477465	0.00294676	0.021988	0.0101508	0.0078604	0.0101004	0.0199559	0.0136915	0.00644676	0.0128501	0.0133958	0.0193264	0.0213476	0.00607577	0.00780332	0.00941924	0.00538391	0.0250155	0.046371	0.0170592	0.0275177	0.0354795	0.00734957	0.118261	0.0158744	0.0387668	0.0340671	0.0264967	0.0108521	0.0379078	0.00995825	0.0186183	0.017393	0.00819053	0.015016	0.0172122	0.0340671	0.0192422	0.0349895	0.0128227	0.00948647	0.0105111	0.0139941	0.0084903	0.00996087	0.0123469
1	0.00446067	0.00591023	0.00544393	0.00669466	0.00379306	0.0183547	0.0109195	0.0164683	0.00943702	0.019458	0.0222149	0.00808407	0.0158431	0.0296261	0.00850534	0.0186898	0.00415141	0.00680558	0.0115353	0.00486196	0.0417386	0.123959	0.0140828	0.0136232	0.0250938	0.0055369	0.136474	0.0247233	0.0231013	0.00477768	0.0203247	0.00581716	0.00598008	0.00619963	0.044079	0.0356428	0.00717509	0.00746152	0.00716154	0.00477768	0.0088607	0.0510138	0.00829579	0.0124628	0.0051353	0.00588118	0.00643693	0.0196191	0.0135965
1	0.00242122	0.00366783	0.00332544	0.00449292	0.00221949	0.0138033	0.00921462	0.0127833	0.00695575	0.0167404	0.0206698	0.00671385	0.0138103	0.0259102	0.00709206	0.0173	0.00318219	0.0068143	0.0099145	0.00357382	0.0404374	0.12072	0.0229516	0.0131384	0.0238532	0.0045594	0.138069	0.0241188	0.0248216	0.0044047	0.0201009	0.00487652	0.00529344	0.00556621	0.0445349	0.0380432	0.00917035	0.0081089	0.00816898	0.0044047	0.00813774	0.0549663	0.00700008	0.0120182	0.0043433	0.00482459	0.00592179	0.0247731	0.017356
1	0.00277392	0.00393973	0.00360864	0.00469196	0.00263	0.0139298	0.00923902	0.0127348	0.00714139	0.0168284	0.0202747	0.00702833	0.0137171	0.0253711	0.00740049	0.0173499	0.00364321	0.00708941	0.0102048	0.00405016	0.0391626	0.11637	0.0218063	0.0131898	0.0243154	0.00516223	0.134187	0.0239203	0.0243474	0.00499609	0.0201067	0.0056123	0.00583554	0.00612718	0.0436589	0.0372252	0.00928633	0.00844122	0.00843641	0.00499609	0.00875781	0.0539883	0.00787044	0.0125044	0.00501412	0.00546091	0.00648736	0.024679	0.0173768
1	0.00247959	0.00437476	0.00310446	0.00391099	0.00330917	0.0178113	0.010552	0.00809669	0.00634241	0.0144542	0.0186334	0.00620524	0.021811	0.0136101	0.00424975	0.0144349	0.0037922	0.00607141	0.00821707	0.00447592	0.0534387	0.0901215	0.00973305	0.00761546	0.0182784	0.00586168	0.266506	0.0299546	0.00936403	0.00498239	0.0142836	0.00560241	0.0086256	0.00634643	0.0302547	0.0187507	0.00521413	0.00516431	0.00472753	0.00498239	0.00936797	0.0700158	0.00675912	0.00860249	0.00601349	0.00711797	0.00555489	0.0104798	0.00845517
1	0.00169749	0.00302025	0.0022187	0.00282252	0.00220212	0.0137921	0.00808509	0.00659733	0.00526884	0.0143357	0.0168525	0.00562421	0.021253	0.0125105	0.00348534	0.0151059	0.00322252	0.00538039	0.00804623	0.00391019	0.0563261	0.090527	0.00983638	0.00696955	0.0229701	0.00491241	0.268175	0.0319478	0.00890559	0.00435429	0.0158976	0.00456859	0.00821813	0.00567269	0.0313292	0.0200218	0.00454591	0.00461147	0.00406797	0.00435429	0.0085465	0.08245	0.00768049	0.00836713	0.00514081	0.00651298	0.00469428	0.0107715	0.00847091
1	0.00278836	0.00451073	0.00347909	0.00386321	0.00318723	0.015086	0.0121838	0.00756579	0.00599232	0.0129042	0.0195623	0.00613312	0.0206051	0.012383	0.0045601	0.0124692	0.00411306	0.00763079	0.00797849	0.00487131	0.0496373	0.0757529	0.0216194	0.00936175	0.0163356	0.00605072	0.252948	0.029272	0.0188116	0.00562619	0.0139165	0.00663792	0.00903178	0.00752917	0.0267316	0.0168866	0.00763776	0.00699807	0.00666689	0.00562619	0.00981769	0.062842	0.00895241	0.00967562	0.00720683	0.00746952	0.00637619	0.0108063	0.00861456
1	0.00296082	0.00459843	0.00397744	0.00404512	0.00416135	0.015413	0.0103981	0.00787499	0.0062606	0.0154104	0.0183673	0.00693858	0.0204282	0.0120457	0.00505895	0.0154126	0.00532136	0.00770362	0.00889293	0.00610345	0.0468884	0.0671346	0.0162084	0.00879884	0.0218543	0.00734142	0.248542	0.028611	0.013024	0.00616173	0.0172128	0.0071503	0.00940875	0.00782751	0.0263301	0.0175342	0.00758527	0.00700972	0.00634862	0.00616173	0.0112419	0.0666269	0.0126721	0.0103429	0.00718854	0.00813773	0.00676861	0.0110612	0.00912275
1	0.00484033	0.00596077	0.0052692	0.00537997	0.00686118	0.0107053	0.00862207	0.0081695	0.00742071	0.0122648	0.0115544	0.0079192	0.0149727	0.00953655	0.00794038	0.011184	0.00746358	0.0086001	0.00941165	0.008107	0.0263568	0.0393873	0.0122725	0.00937779	0.0134818	0.00840337	0.202865	0.0220821	0.0116163	0.00957759	0.0134979	0.0114615	0.0111705	0.0118298	0.0332052	0.0182267	0.0100026	0.00930648	0.00912037	0.00957759	0.0145295	0.0672237	0.0145527	0.0140581	0.0111627	0.0121076	0.0117245	0.0174109	0.0133527
1	0.00490409	0.00606709	0.00540296	0.00553068	0.00687317	0.0110473	0.00901182	0.00831093	0.00772852	0.0130797	0.0117262	0.00860506	0.0158313	0.00972824	0.00790971	0.0116736	0.00732048	0.00866969	0.00943982	0.00824696	0.0279463	0.0408501	0.0125655	0.0094781	0.0139885	0.00841023	0.21232	0.0225031	0.0113209	0.00888387	0.0136707	0.0109496	0.0109753	0.0114821	0.0334635	0.0177584	0.00997256	0.008975	0.00870108	0.00888387	0.0144892	0.063465	0.013968	0.0137498	0.0105042	0.0115869	0.0112054	0.0167031	0.0128757
1	0.00122981	0.00221162	0.00168563	0.00169754	0.00187849	0.00677124	0.00538265	0.00390104	0.00302402	0.0107521	0.0123405	0.00449083	0.0147502	0.00617898	0.00376198	0.00923729	0.00289584	0.00527158	0.00598812	0.00452349	0.0351378	0.0538352	0.0136721	0.00578123	0.0131665	0.00420414	0.319544	0.0243408	0.0112016	0.0042938	0.0119659	0.00578291	0.00717722	0.00910103	0.0394076	0.0183936	0.0071938	0.00557848	0.00499462	0.0042938	0.0116974	0.0920612	0.0110788	0.0099207	0.00541456	0.00721189	0.00661265	0.0152406	0.00918008
1	0.00419981	0.00479109	0.00446346	0.0046211	0.00490521	0.0126075	0.0105639	0.0129493	0.00763327	0.0179981	0.0217161	0.00809905	0.0173781	0.0241909	0.00664241	0.0179845	0.00492428	0.00750196	0.0118046	0.00597774	0.0420723	0.14462	0.0123557	0.0109541	0.0233666	0.00603375	0.193427	0.0212679	0.0163989	0.00579246	0.0149397	0.00714155	0.00728342	0.00669631	0.0294813	0.0384442	0.00694107	0.00689532	0.00640779	0.00579246	0.00988592	0.0497572	0.00912678	0.00906683	0.00641833	0.0068189	0.00652596	0.0106198	0.011909
1	0.00481741	0.00538415	0.00522721	0.00547761	0.00630543	0.0113716	0.0103034	0.0123336	0.00840917	0.0172937	0.0193005	0.00904575	0.0156554	0.0193995	0.00799988	0.0180437	0.00759062	0.00853963	0.0116209	0.00786987	0.0337883	0.107968	0.0133792	0.0121722	0.024255	0.00929952	0.157825	0.0206461	0.0174175	0.00819216	0.0169115	0.0100157	0.00959005	0.00887877	0.0274536	0.0383974	0.00929202	0.00944486	0.00882945	0.00819216	0.0127555	0.0508839	0.0150323	0.0121162	0.00894773	0.00977739	0.00902473	0.0135489	0.0145608
1	0.00253863	0.00370394	0.00294246	0.00381996	0.00259015	0.0109925	0.00808662	0.0102422	0.00518151	0.0152457	0.0176314	0.00601464	0.0133475	0.0194979	0.00481201	0.0163775	0.0035269	0.0061718	0.00992908	0.00409341	0.0373396	0.139407	0.0173028	0.00997115	0.0245588	0.00501332	0.203568	0.0206023	0.0186742	0.00601755	0.0157439	0.0062763	0.00657862	0.00614578	0.0307547	0.0465482	0.0080708	0.00711994	0.00640392	0.00601755	0.00967319	0.0612686	0.00971948	0.00883133	0.00565391	0.00641268	0.00575119	0.0130292	0.0162412
1	0.00379878	0.00462384	0.00409127	0.00486288	0.00441857	0.0104108	0.00895949	0.00991365	0.00625456	0.0137067	0.01706	0.00719923	0.0135979	0.0174167	0.00663267	0.0152319	0.00574146	0.00791226	0.0108842	0.00637554	0.0340611	0.109182	0.018384	0.0111938	0.0249298	0.00789566	0.176104	0.0210972	0.018659	0.00846461	0.0161539	0.00943862	0.00862628	0.00858337	0.0289535	0.0391455	0.0099875	0.00922629	0.00858876	0.00846461	0.0123693	0.0548883	0.0145739	0.0117973	0.00832416	0.00912828	0.00876934	0.0147578	0.0166124
1	0.00300635	0.00538832	0.00343139	0.00487884	0.00281704	0.0132037	0.00937907	0.0124723	0.00941609	0.0165403	0.0190368	0.0061525	0.0232643	0.0249846	0.00844389	0.0160477	0.00351091	0.00528778	0.00931098	0.00394993	0.0364962	0.13177	0.0172817	0.0126049	0.0212818	0.00485766	0.125003	0.0267414	0.0183579	0.0073578	0.0186098	0.00567744	0.00802145	0.00659895	0.0331664	0.0512592	0.0113289	0.00809286	0.00762038	0.0073578	0.00877103	0.0514928	0.00706974	0.0159389	0.00532176	0.00707149	0.00773778	0.0179184	0.0226322
1	0.0028616	0.00539768	0.00322105	0.00477367	0.00237721	0.0123445	0.009508	0.0122326	0.00925632	0.0156783	0.019713	0.00569913	0.0243794	0.0248975	0.00814085	0.0153998	0.00300812	0.00490493	0.00908979	0.00346486	0.0384403	0.130062	0.0192763	0.0126763	0.0209746	0.00418598	0.128296	0.0302361	0.0184893	0.00408566	0.0188249	0.00467846	0.00607101	0.00635843	0.0371182	0.0526055	0.0122099	0.00737644	0.00716568	0.00408566	0.0086092	0.0534037	0.00602365	0.0171833	0.00453179	0.00662526	0.00761089	0.0186001	0.0216162
1	0.0031938	0.00457958	0.00412281	0.00458808	0.00398407	0.0112338	0.00898633	0.0105739	0.00856204	0.0168246	0.0179663	0.00742501	0.0205445	0.0204048	0.00924296	0.0181914	0.0061619	0.00769204	0.0103285	0.00651219	0.03371	0.104052	0.0244263	0.0139711	0.02625	0.00830983	0.104429	0.0246111	0.0189542	0.0109325	0.0213323	0.00863004	0.0140929	0.0086201	0.0286256	0.0426445	0.014065	0.0103853	0.00981445	0.0109325	0.0117	0.0443401	0.0124541	0.0166245	0.00901795	0.01109	0.00948427	0.0174452	0.0216975
1	0.00357886	0.00499546	0.004535	0.00492297	0.00500084	0.00954915	0.00931643	0.0102954	0.00841352	0.0131566	0.0171997	0.00773915	0.0183326	0.0182564	0.00907185	0.0147084	0.00609177	0.00840229	0.00964331	0.0067623	0.0302861	0.0879917	0.0282367	0.0139612	0.0230863	0.00851034	0.0925551	0.0252994	0.0203954	0.00808519	0.0184509	0.00907245	0.00917129	0.00930344	0.0307064	0.0428589	0.0172501	0.0120301	0.0114216	0.00808519	0.0127335	0.0489787	0.0121784	0.0201011	0.00924847	0.0112042	0.0113767	0.021461	0.024595
1	0.0021514	0.00337842	0.0024036	0.0027086	0.00257126	0.00890945	0.00817231	0.00539017	0.0046118	0.00994927	0.0131289	0.0048378	0.0174384	0.0104393	0.00828092	0.0104041	0.00404962	0.006851	0.00688479	0.00525321	0.0406023	0.0747296	0.036952	0.0117771	0.0213362	0.00652614	0.226602	0.0364882	0.0208401	0.00593243	0.0186188	0.00810726	0.00939684	0.0102757	0.047175	0.0267231	0.0108857	0.00884811	0.00777095	0.00593243	0.0167235	0.0645857	0.0128364	0.0116509	0.00931103	0.0072821	0.0108222	0.0130618	0.011631
1	0.00317438	0.00464705	0.00300463	0.00392297	0.00314846	0.0151852	0.0125575	0.00861895	0.00677232	0.0153105	0.0200131	0.00617423	0.027129	0.0154548	0.0105535	0.0121663	0.00404899	0.0072568	0.00778491	0.00448102	0.0493237	0.0973229	0.0419144	0.0124034	0.0176154	0.00561758	0.204618	0.0343885	0.0203005	0.00558582	0.0153812	0.00753025	0.00857962	0.00895781	0.0413599	0.0236362	0.00951823	0.00758947	0.00698363	0.00558582	0.013047	0.0500149	0.00854949	0.00991576	0.00889141	0.00661479	0.00948355	0.0104797	0.00976437
1	0.00318322	0.00445609	0.00356432	0.00376749	0.00460259	0.00892528	0.00774693	0.00629395	0.00548855	0.0110294	0.0131847	0.00596665	0.0189402	0.00880409	0.00562317	0.0115691	0.00607089	0.00753848	0.00784998	0.00615584	0.0359891	0.0562654	0.0112964	0.00763959	0.0153026	0.00713793	0.220539	0.0196532	0.0100602	0.00967022	0.0139593	0.00978478	0.0118276	0.00918798	0.0322199	0.0269276	0.00801019	0.00825587	0.00777698	0.00967022	0.0141394	0.0768809	0.0115924	0.0114784	0.0107513	0.0126482	0.00929689	0.0142406	0.0134169
1	0.00379118	0.00501852	0.00413004	0.00439767	0.00556085	0.00926283	0.0082355	0.00687594	0.00629094	0.0105553	0.0123673	0.0067447	0.0174289	0.0087487	0.00641724	0.0114194	0.00670966	0.00799303	0.00839383	0.00696457	0.032421	0.0491449	0.0115738	0.00840298	0.0148846	0.00800713	0.194805	0.0195106	0.0108979	0.0109384	0.0141895	0.0110969	0.0127084	0.00997298	0.0322838	0.0263684	0.0091554	0.00912766	0.00885828	0.0109384	0.0157241	0.0732937	0.0128793	0.0125738	0.0122498	0.0140488	0.0109872	0.0157497	0.0148082
1	0.00123359	0.00275401	0.00184221	0.00206992	0.00218125	0.00794895	0.00716038	0.00460423	0.00347804	0.0119566	0.0158869	0.00465142	0.0227192	0.00819369	0.00388839	0.012497	0.0040663	0.00670412	0.00701697	0.00478025	0.0472099	0.0736375	0.0138572	0.00622147	0.0159529	0.00521828	0.283105	0.0200415	0.00981949	0.00700221	0.0125877	0.00646549	0.00989002	0.00683381	0.0329934	0.025826	0.00638486	0.0057943	0.00536365	0.00700221	0.011668	0.0795333	0.00849328	0.00810769	0.00722299	0.00912798	0.00594341	0.0110955	0.0103175
1	0.00133743	0.00282308	0.00183991	0.00217912	0.00225113	0.00767546	0.00690698	0.0046266	0.00360196	0.0113899	0.0161687	0.00497107	0.0220349	0.00780382	0.00390442	0.0120976	0.00436655	0.00694062	0.00703563	0.00497952	0.044588	0.0697768	0.0147734	0.00644484	0.015456	0.00539109	0.276317	0.0198037	0.0102894	0.00773748	0.0123121	0.00689556	0.0106286	0.0071488	0.0328073	0.0259856	0.00686007	0.00637614	0.00600972	0.00773748	0.0121027	0.0805848	0.00927118	0.0087858	0.00768138	0.00997569	0.00656222	0.0117822	0.0103558
1	0.00309569	0.00413447	0.00377415	0.00318037	0.00410225	0.012689	0.00626765	0.00576293	0.00427432	0.00903706	0.0110412	0.00574745	0.0132095	0.00606254	0.00482612	0.00953602	0.00581187	0.00639607	0.00747613	0.00607693	0.0227517	0.0427026	0.0102208	0.00771588	0.0140648	0.00600234	0.143825	0.0353089	0.0126608	0.0367323	0.0122653	0.0131916	0.0291354	0.0142728	0.0785906	0.0199448	0.00858221	0.00835688	0.00784755	0.0367323	0.0152474	0.0562264	0.0149506	0.0138764	0.0160941	0.0171618	0.0100211	0.0249077	0.0111129
1	0.00193331	0.00300594	0.0025872	0.00203681	0.00215516	0.0115849	0.00498207	0.00423254	0.00254199	0.00743447	0.0102861	0.00400069	0.0127604	0.00470055	0.00302637	0.008016	0.00406883	0.00425233	0.00576457	0.00440507	0.0240122	0.0442023	0.0093307	0.00611171	0.0127895	0.00419891	0.164839	0.0400278	0.0111596	0.0447594	0.0111734	0.0109776	0.0323649	0.0133505	0.0948852	0.0196038	0.00652132	0.00603991	0.00547921	0.0447594	0.0137816	0.0631368	0.0126906	0.0119106	0.0153098	0.0167903	0.00737047	0.0262042	0.00830564
1	0.00127857	0.00282454	0.00231157	0.00158595	0.00152685	0.0132844	0.00576045	0.00410446	0.00206123	0.00772398	0.0111128	0.00365197	0.011995	0.00417361	0.00237393	0.00756924	0.00333558	0.00412485	0.00544214	0.00379846	0.0236479	0.0454942	0.0112026	0.00565403	0.0114364	0.00345594	0.164348	0.0358445	0.0120096	0.0384379	0.010537	0.0100682	0.0280696	0.012922	0.091969	0.0204463	0.0070525	0.00725389	0.00623615	0.0384379	0.0141699	0.0694754	0.0123769	0.0121297	0.014171	0.0170272	0.0074055	0.0286116	0.00890126
1	0.000854882	0.00195785	0.00147014	0.00116219	0.00117452	0.0095431	0.00473337	0.00302788	0.00159354	0.006319	0.0106809	0.00313884	0.0126994	0.00387991	0.00217408	0.00704493	0.00320006	0.00402293	0.00518236	0.00383301	0.0261394	0.0471139	0.0121083	0.00570409	0.0114909	0.00308149	0.189137	0.0422623	0.0128705	0.0423533	0.0102785	0.00967828	0.0303229	0.013078	0.100102	0.01886	0.00664142	0.00677616	0.00595414	0.0423533	0.0134808	0.0673589	0.012063	0.0111353	0.0132655	0.0146716	0.00619786	0.026059	0.00697253
1	0.00379695	0.00417417	0.00442763	0.00491432	0.00489402	0.0157121	0.00933355	0.0106347	0.00768702	0.0135965	0.0157468	0.00794043	0.0160915	0.017929	0.00730764	0.0117648	0.0049682	0.00676541	0.010043	0.00581518	0.0445657	0.0990018	0.0130333	0.0102862	0.0163382	0.00606482	0.222836	0.0230546	0.0144993	0.00645287	0.013899	0.00835913	0.00769849	0.0079387	0.0298414	0.0294873	0.00776957	0.00713575	0.00690339	0.00645287	0.0111231	0.0596322	0.0100051	0.010476	0.00751422	0.00781157	0.00832672	0.012769	0.0140616
1	0.00438236	0.00485837	0.00491658	0.00506049	0.00552533	0.0139599	0.00892474	0.00975038	0.00768377	0.0129067	0.0143417	0.00849914	0.0151431	0.0159371	0.00828575	0.0123869	0.00622227	0.00772705	0.0104956	0.006741	0.03962	0.0813966	0.013987	0.0109728	0.0186822	0.0082033	0.200882	0.0231105	0.0150193	0.00854969	0.0150024	0.0105983	0.00968168	0.0100296	0.0286575	0.027494	0.00943403	0.00893483	0.00874019	0.00854969	0.0132342	0.0551057	0.0127662	0.0127239	0.00982354	0.0100323	0.0102657	0.013865	0.0149698
1	0.00138633	0.00231688	0.00217334	0.0028668	0.00165681	0.0103178	0.00948891	0.00686183	0.00431497	0.00809489	0.016613	0.00445965	0.0141734	0.0128367	0.00444735	0.00651092	0.00212519	0.00513609	0.00622723	0.00367799	0.048093	0.0875927	0.0274628	0.00954825	0.0114239	0.00360886	0.295136	0.0267554	0.0237133	0.00406602	0.0102577	0.00423752	0.00545392	0.00608019	0.0352671	0.0297732	0.0100739	0.00624092	0.00578631	0.00406602	0.0102033	0.0774697	0.00779004	0.00856733	0.00471317	0.0046167	0.00569412	0.0124656	0.0124009
1	0.0025863	0.00259599	0.00279976	0.00352165	0.00332932	0.0106292	0.0089103	0.00789754	0.0054404	0.00965181	0.0141307	0.00629126	0.012865	0.0147873	0.00636958	0.00939547	0.00423767	0.00636108	0.00813882	0.00488488	0.0403945	0.0894306	0.0244166	0.0112838	0.0134862	0.00584205	0.228714	0.0250277	0.0204444	0.00707148	0.0128914	0.0080733	0.00779395	0.00905605	0.0318992	0.0314265	0.0113489	0.00871238	0.00891726	0.00707148	0.012235	0.0635016	0.00955828	0.0113006	0.00786574	0.00778163	0.00887036	0.0141659	0.0154709
1	0.00253713	0.00294121	0.00338514	0.00586107	0.00315021	0.0133104	0.0108237	0.0141127	0.00909981	0.0126241	0.0192524	0.00836432	0.0207503	0.0367197	0.00626833	0.0118718	0.00345934	0.00629168	0.0108557	0.00418047	0.0650549	0.148606	0.011708	0.0121303	0.0192935	0.0044641	0.190184	0.0232562	0.020608	0.00875069	0.0132702	0.00600115	0.01039	0.00562414	0.0361484	0.0321078	0.00517083	0.00555743	0.00521537	0.00875069	0.00676989	0.045765	0.00770146	0.00727136	0.00513316	0.0058037	0.00493091	0.0101912	0.0101843
1	0.00427946	0.00452213	0.00511022	0.00781207	0.00550099	0.0143251	0.0130632	0.0161806	0.0112511	0.0128095	0.0206296	0.0103476	0.0203854	0.0355935	0.00821229	0.0119533	0.00570427	0.00902429	0.0133386	0.0071622	0.0590805	0.136846	0.0125571	0.0135082	0.0164118	0.00678232	0.173141	0.0224373	0.0203325	0.00624333	0.0125688	0.00809615	0.00689736	0.00742632	0.0321841	0.0291875	0.00682887	0.00726772	0.00699535	0.00624333	0.00882432	0.0394549	0.00920139	0.00892799	0.0064227	0.00697937	0.00656899	0.0107039	0.0106908
1	0.00163795	0.00189552	0.00277195	0.00546097	0.00178823	0.0122003	0.0125266	0.0140574	0.00865309	0.0120626	0.0216203	0.00790997	0.0210094	0.0369148	0.00548447	0.0109792	0.00279304	0.00706209	0.0101989	0.00457087	0.0684395	0.154152	0.0315531	0.0131362	0.0187288	0.00460264	0.210835	0.0226029	0.0249361	0.00379665	0.0121924	0.00418167	0.00446902	0.0048269	0.0343428	0.030971	0.00749354	0.0058408	0.00546251	0.00379665	0.00582972	0.0451049	0.00624706	0.00617614	0.00322032	0.00342129	0.00344078	0.00864853	0.00835633
1	0.00101557	0.00146031	0.00180445	0.00369763	0.00150595	0.00822391	0.0111409	0.0102709	0.00681673	0.00917871	0.021887	0.0058938	0.0204393	0.0298279	0.00503422	0.00856005	0.00270779	0.00735099	0.00846982	0.0051779	0.0741768	0.133427	0.0421614	0.0142522	0.0184059	0.00463618	0.238423	0.0256786	0.0285316	0.00308229	0.0106611	0.00366771	0.00443206	0.00483624	0.0393802	0.0270775	0.00896872	0.00682729	0.00636775	0.00308229	0.00603473	0.0487613	0.0057653	0.00611034	0.00305937	0.00322434	0.00316993	0.00879362	0.00707478
1	0.00124354	0.00261628	0.00166091	0.00195819	0.00173345	0.00885086	0.00612685	0.00467853	0.00269575	0.0104009	0.0112342	0.00380594	0.0141375	0.00640155	0.00416619	0.00931925	0.00388287	0.00404048	0.00562598	0.00346448	0.029327	0.0628097	0.0102652	0.00488485	0.0142694	0.0045286	0.204579	0.0194747	0.00646213	0.0844714	0.013185	0.00913908	0.061313	0.0063344	0.0254143	0.0138103	0.00529428	0.00546649	0.00475252	0.0844714	0.0103916	0.0507305	0.00760251	0.00685684	0.0116417	0.0149795	0.00501013	0.00850663	0.00674523
1	0.0011224	0.00223199	0.00141656	0.001628	0.00150716	0.00719515	0.00470682	0.00382025	0.00230132	0.00930104	0.00947974	0.00330001	0.0133503	0.00535291	0.00339436	0.0085572	0.00350759	0.00341761	0.00476679	0.00282242	0.0278196	0.0535905	0.0093967	0.0040536	0.014141	0.00373462	0.203505	0.0187464	0.00546881	0.101024	0.0126393	0.00927187	0.0644233	0.00561948	0.0249691	0.0122774	0.00430588	0.00476658	0.00413718	0.101024	0.00968726	0.054132	0.00712781	0.00602013	0.0123857	0.0152826	0.0044357	0.00816351	0.00603286
1	0.00120373	0.00280297	0.00158898	0.00172628	0.00127614	0.00905152	0.00631948	0.00430916	0.00214277	0.0106395	0.0119839	0.00354326	0.0135776	0.00548683	0.00326209	0.00885962	0.00317019	0.0037588	0.00475436	0.00260719	0.028083	0.059634	0.012019	0.00415121	0.0137574	0.0034288	0.208859	0.0182876	0.00722583	0.0872487	0.0123293	0.00937904	0.0586303	0.00608608	0.0246897	0.0137284	0.00492601	0.00506981	0.00431068	0.0872487	0.0110402	0.0556292	0.00814415	0.00638198	0.0114348	0.0151023	0.00475035	0.00837771	0.00661369
1	0.00170352	0.00246923	0.00203251	0.00206172	0.00244349	0.00568262	0.00504505	0.00373455	0.00295616	0.00652055	0.00799852	0.00385927	0.00808481	0.00490623	0.00389297	0.00702439	0.00396306	0.00484567	0.00528634	0.00400808	0.019191	0.0406554	0.0129079	0.00552924	0.0119187	0.00490972	0.167964	0.0176025	0.0121841	0.0818897	0.0130308	0.0124147	0.0533118	0.00894689	0.0267946	0.0161329	0.00869006	0.00837959	0.00805622	0.0818897	0.0166323	0.0542771	0.0114261	0.0104094	0.0152033	0.0195376	0.00863776	0.0120427	0.010251
1	0.00851369	0.0106874	0.00774446	0.00722716	0.00823693	0.016808	0.0120006	0.0102005	0.00869026	0.0196966	0.0148591	0.00867759	0.0175443	0.0115507	0.00914179	0.018138	0.0105692	0.00879643	0.00942079	0.00848341	0.0256216	0.0349123	0.0161525	0.00983009	0.0218682	0.00910605	0.0850729	0.0188537	0.010531	0.0517274	0.0189828	0.013615	0.0541231	0.0119459	0.0217992	0.0134499	0.0103279	0.00962578	0.0091962	0.0517274	0.016799	0.0298267	0.0121126	0.012925	0.0190431	0.0186328	0.012268	0.0136437	0.0124756
1	0.0090121	0.0119603	0.00881712	0.00848701	0.00970893	0.0185443	0.0128133	0.0114961	0.0104832	0.020356	0.0139657	0.00986985	0.0157977	0.0116894	0.00981577	0.0177543	0.0108128	0.0096014	0.0103005	0.0095224	0.0206167	0.02784	0.0141313	0.0106673	0.020536	0.0106437	0.0618653	0.0166542	0.0111239	0.0491417	0.019315	0.0147877	0.046157	0.0123866	0.020039	0.0143224	0.0111013	0.0108499	0.0103407	0.0491417	0.0175766	0.0288718	0.0131501	0.0138015	0.0195496	0.0202069	0.0138574	0.015392	0.0141959
1	0.00254644	0.00325535	0.00371696	0.00356394	0.00342239	0.0160145	0.0100673	0.00779652	0.00615621	0.0123743	0.0153971	0.00647245	0.0142505	0.0141308	0.0066264	0.0132813	0.00539449	0.00717209	0.00852445	0.005247	0.0399516	0.0645579	0.02163	0.0132347	0.0161274	0.00579488	0.181925	0.0343148	0.022822	0.00837706	0.0143034	0.00867287	0.00947755	0.0105079	0.0558037	0.0229923	0.0116039	0.0110335	0.0111781	0.00837706	0.0210114	0.0611708	0.0102576	0.0164754	0.012209	0.00865763	0.0100459	0.0229812	0.0112619
1	0.00248679	0.00303452	0.00383723	0.00344535	0.00328977	0.0152635	0.00938912	0.00768139	0.00605286	0.0119818	0.0141505	0.00642456	0.0130156	0.0135986	0.00683848	0.0132922	0.00582581	0.00691871	0.00860636	0.00551137	0.0375806	0.0659765	0.0195114	0.0132431	0.0164348	0.00586579	0.181997	0.0334946	0.0217087	0.0097959	0.0142731	0.00884235	0.0101368	0.0104927	0.05728	0.0251644	0.0113419	0.0107704	0.0108919	0.0097959	0.0213936	0.0625341	0.00987271	0.0164706	0.0126685	0.008763	0.00979442	0.0244581	0.0116806
1	0.00435726	0.00421673	0.0055585	0.00479847	0.00579147	0.0156791	0.00830391	0.00753541	0.00651434	0.0190027	0.0117554	0.00711843	0.0210878	0.00886776	0.0103482	0.0175831	0.0105548	0.00756464	0.00847955	0.00712739	0.0214232	0.0319078	0.018267	0.010114	0.0220968	0.00895323	0.0864914	0.0205031	0.0107691	0.0592123	0.0216999	0.0163397	0.0592621	0.0131836	0.0211387	0.0140813	0.0101099	0.00995608	0.00936063	0.0592123	0.0167677	0.0313444	0.0124004	0.0115584	0.0194382	0.0190614	0.011321	0.0126857	0.0115241
1	0.00238373	0.00175159	0.00380569	0.00254586	0.00263384	0.0170318	0.00612438	0.0048495	0.00352388	0.0202123	0.0112476	0.00391579	0.0247471	0.00627691	0.00839074	0.0168733	0.0086382	0.00450381	0.00531263	0.00390319	0.0232512	0.034758	0.0200872	0.00744308	0.0214581	0.00579733	0.109593	0.0227631	0.00757877	0.0816037	0.021524	0.0140712	0.0769077	0.0111568	0.0220675	0.0112399	0.00648292	0.00669159	0.00549669	0.0816037	0.0135724	0.0346532	0.00810333	0.00743991	0.0203464	0.0188586	0.00779504	0.00961503	0.00837865
1	0.0019331	0.00163778	0.00354805	0.00261838	0.00250701	0.0177091	0.00770459	0.00586704	0.00379165	0.0249839	0.0163054	0.00499056	0.0296259	0.00798471	0.00912406	0.0202395	0.00949556	0.00690994	0.00641912	0.00468114	0.0273131	0.0432093	0.0244958	0.00863674	0.0237063	0.00667569	0.121404	0.0225842	0.0100046	0.0623411	0.0212652	0.0142673	0.0647017	0.0117303	0.0230706	0.012434	0.00758586	0.00798947	0.00716859	0.0623411	0.0151075	0.0360014	0.010006	0.00815631	0.0168728	0.016884	0.0078721	0.00997454	0.00786155
1	0.00154143	0.00107785	0.00327251	0.00199641	0.00177699	0.0169942	0.00704474	0.00471593	0.00296398	0.0214447	0.0135676	0.00379037	0.0242736	0.00643083	0.00795312	0.0172545	0.00814709	0.00519134	0.00497856	0.00321353	0.0229906	0.0408542	0.0213559	0.0074149	0.0211566	0.00516682	0.112191	0.0203187	0.00972338	0.0742585	0.020225	0.0137744	0.0753847	0.0109195	0.0231364	0.0130196	0.00676031	0.007014	0.00601722	0.0742585	0.0156588	0.0383156	0.00919786	0.00740265	0.0188741	0.019898	0.0077209	0.00991849	0.0082649
1	0.0034716	0.00552892	0.00380128	0.00318677	0.00394986	0.0112968	0.00596362	0.00502679	0.00413999	0.0169752	0.00773499	0.00522371	0.0115925	0.00606854	0.00500599	0.0147429	0.00579552	0.0052103	0.00609848	0.00518088	0.0179449	0.029662	0.00960283	0.00681873	0.0215669	0.00646136	0.122756	0.0170035	0.00879983	0.0899229	0.0215614	0.0128993	0.0553048	0.00993781	0.0268556	0.0122776	0.00801738	0.00842411	0.00736055	0.0899229	0.0162697	0.0393792	0.0115812	0.0101331	0.0202564	0.0181021	0.00889826	0.0133714	0.0100526
1	0.00434466	0.00709996	0.00446465	0.00358999	0.00455399	0.0121137	0.00671532	0.00572403	0.00456841	0.0150761	0.00783562	0.00511809	0.0118926	0.00601951	0.00514115	0.0122726	0.00597025	0.00528749	0.00593187	0.00528515	0.017019	0.0258754	0.00957233	0.00652025	0.0178732	0.00626234	0.117209	0.0170377	0.00790909	0.0998311	0.0188691	0.0124281	0.0569347	0.00937096	0.026315	0.0114388	0.00772839	0.00784481	0.00694407	0.0998311	0.0152803	0.0369158	0.0108955	0.0100814	0.0213475	0.0179013	0.00882846	0.0129979	0.0101688
1	0.00136381	0.00409813	0.00185631	0.00108882	0.00101854	0.0140301	0.00546276	0.00341098	0.00168304	0.0253215	0.00972399	0.00336759	0.0139087	0.00500824	0.00288871	0.0205921	0.00397931	0.00433123	0.00499287	0.00274352	0.0233446	0.0509026	0.0126968	0.00536658	0.0288658	0.00377727	0.172435	0.0176118	0.00843421	0.0947923	0.0239302	0.00781185	0.0728021	0.0068568	0.0271556	0.0108605	0.00475446	0.00548569	0.00415488	0.0947923	0.0128518	0.0371109	0.00671421	0.00540389	0.0150376	0.0149838	0.00431242	0.00833656	0.00548704
1	0.00210717	0.00619179	0.00252422	0.00135209	0.00135783	0.0131864	0.00783318	0.00333027	0.00190359	0.0184807	0.011524	0.00305073	0.0136303	0.00484388	0.00293868	0.0136825	0.00385799	0.00551731	0.00406565	0.00303666	0.0214425	0.0364803	0.0164696	0.00567712	0.0196299	0.00381585	0.155325	0.0185236	0.0148348	0.0958117	0.0191035	0.0110863	0.0595842	0.0088771	0.0309169	0.00989916	0.00667048	0.00769127	0.00642602	0.0958117	0.0216229	0.0368493	0.0103816	0.00742232	0.0168789	0.0137865	0.00627103	0.010314	0.00631757
1	0.00614193	0.00812462	0.00524204	0.00527487	0.0046541	0.0155384	0.0122652	0.00972536	0.00619747	0.0145057	0.0214539	0.00630044	0.0183207	0.0121252	0.00662532	0.0133956	0.00767384	0.00667851	0.00788999	0.00560212	0.034661	0.0723797	0.0207858	0.00819132	0.0178712	0.00842705	0.144296	0.0232036	0.0113504	0.0284635	0.0160824	0.0109148	0.0292548	0.0130295	0.025598	0.0197623	0.0111092	0.00817259	0.00775121	0.0284635	0.0151262	0.0492738	0.0100819	0.0123994	0.0121516	0.0145277	0.0109337	0.013406	0.0117847
1	0.00703547	0.00915229	0.00655172	0.00674512	0.00724408	0.0158702	0.0128887	0.011254	0.00859806	0.0151127	0.0189556	0.00883634	0.0173346	0.0126967	0.00900295	0.0140314	0.0096074	0.00918791	0.0096313	0.00814747	0.0265935	0.0539794	0.0188594	0.0108236	0.0173783	0.0115012	0.0994557	0.020499	0.0142654	0.0256364	0.0162605	0.0144233	0.0262358	0.0139982	0.0228245	0.0199548	0.0130343	0.010999	0.0107366	0.0256364	0.017771	0.0413384	0.0138763	0.014986	0.0153681	0.0167737	0.0141395	0.0156819	0.0150413
1	0.00510318	0.0086895	0.00479428	0.00504295	0.00379928	0.015147	0.0148249	0.00930352	0.00562348	0.0128563	0.0251691	0.00597774	0.0170036	0.0126216	0.00602882	0.0118358	0.00746028	0.00722396	0.00766277	0.00526868	0.0338346	0.0697484	0.028847	0.00853952	0.0158151	0.00785763	0.142192	0.0230914	0.0135426	0.0256464	0.0147406	0.0104421	0.0263497	0.0123552	0.025977	0.0195633	0.0125775	0.00905089	0.00894232	0.0256464	0.0154541	0.0493273	0.00997302	0.0120524	0.0119846	0.0137227	0.0106749	0.0134658	0.0113001
1	0.0091944	0.00936676	0.00625188	0.00641071	0.00534077	0.0159471	0.0148223	0.0101603	0.00657355	0.0148181	0.0244951	0.00679222	0.0193356	0.0126946	0.00722789	0.0136115	0.00762468	0.00807502	0.00780582	0.00570849	0.0357116	0.0735564	0.029152	0.00947831	0.0174846	0.0106049	0.141794	0.0231614	0.0138936	0.0243776	0.0148693	0.0106986	0.0257631	0.0125128	0.0251125	0.0194755	0.012222	0.0092385	0.009065	0.0243776	0.0149927	0.0459019	0.0106731	0.0122765	0.0114029	0.0129826	0.0104027	0.0129255	0.0110982
1	0.00226702	0.00522194	0.00246398	0.00296836	0.00264114	0.0121622	0.0102556	0.00581597	0.00449174	0.0130034	0.0159795	0.00497558	0.0274248	0.00892578	0.00360125	0.0110485	0.00422706	0.00496017	0.00600968	0.00444554	0.0492638	0.0534842	0.0121763	0.00547239	0.0135923	0.00508295	0.240316	0.0225382	0.00710816	0.0622929	0.0124987	0.00808085	0.0324506	0.00648454	0.0277607	0.010739	0.00535551	0.00517906	0.00461859	0.0622929	0.00988758	0.0492076	0.00721748	0.00631426	0.0108761	0.0097385	0.00469201	0.00747815	0.00573899
1	0.00196954	0.00492367	0.00218768	0.00268398	0.0020171	0.0121788	0.010282	0.00555303	0.00405287	0.0125252	0.015168	0.00442818	0.0247335	0.00820509	0.00303305	0.010314	0.0036383	0.00417314	0.00525965	0.00348766	0.0460366	0.0522712	0.0108975	0.00484159	0.013103	0.00458127	0.232527	0.0217874	0.00672861	0.0703816	0.0123738	0.00770036	0.0348144	0.00601078	0.0291794	0.0109876	0.0050857	0.00525236	0.0044058	0.0703816	0.00936682	0.0521468	0.00632331	0.00577174	0.0114386	0.0102191	0.00425627	0.00736884	0.00563896
1	0.00262553	0.0041397	0.0028815	0.00307783	0.00333785	0.00867643	0.00796882	0.00517124	0.00427408	0.0115498	0.0133448	0.00532334	0.0204485	0.007546	0.00455728	0.0112162	0.00531406	0.00618563	0.00674479	0.00567007	0.0389749	0.0405201	0.0137381	0.00696515	0.0163767	0.00718633	0.225078	0.0212756	0.0111708	0.0515359	0.0162616	0.0123967	0.029042	0.00927847	0.0262297	0.0131708	0.00808618	0.00855999	0.00787709	0.0515359	0.0143493	0.0541821	0.0139461	0.00962766	0.0129063	0.0121458	0.00729058	0.00977323	0.00824513
1	0.00142011	0.00345759	0.00171668	0.00198055	0.00172087	0.00718949	0.00797228	0.00383461	0.00305832	0.00826124	0.012802	0.00342318	0.0194266	0.00627239	0.00292824	0.00767244	0.00321572	0.00483222	0.0043825	0.00357675	0.0397077	0.0397535	0.0170354	0.00587498	0.0113765	0.00426914	0.239622	0.0219893	0.016244	0.0703917	0.0123922	0.0101901	0.032215	0.00743791	0.0299123	0.0109541	0.00623892	0.00686735	0.00618209	0.0703917	0.0157332	0.0586879	0.00979639	0.00718162	0.0125909	0.0108968	0.00502853	0.00838951	0.00587053
1	0.00580104	0.00787559	0.00633173	0.00660394	0.00827009	0.0126576	0.0113335	0.00980263	0.00838326	0.012848	0.0136022	0.00893164	0.0165335	0.00995684	0.00839232	0.0127646	0.00871479	0.00955949	0.00995408	0.00853633	0.0209341	0.0556542	0.0128017	0.00968767	0.0150054	0.00912708	0.170389	0.0198828	0.0109737	0.0234146	0.0143187	0.0123724	0.0203195	0.0111937	0.0224659	0.0221094	0.0101097	0.00978472	0.00942691	0.0234146	0.0138885	0.0523975	0.0133926	0.013005	0.0121253	0.0146228	0.0114602	0.0135082	0.0133741
1	0.00336622	0.004503	0.00373555	0.00400873	0.0049084	0.00773939	0.00691167	0.0060414	0.00508741	0.00909173	0.00995848	0.00572576	0.0136618	0.006766	0.00551034	0.0100119	0.00583367	0.00686076	0.00708755	0.00571731	0.0207902	0.0612961	0.0108683	0.00714033	0.0148607	0.00650311	0.232936	0.0216989	0.0088392	0.031126	0.0135243	0.00966224	0.0246181	0.00928816	0.0276251	0.0257087	0.00826923	0.00720622	0.00679199	0.031126	0.0123214	0.0769042	0.0122434	0.0109344	0.00987057	0.0136382	0.00866555	0.0119111	0.0120445
1	0.00240939	0.00404788	0.00272987	0.00313741	0.00383802	0.00757464	0.0073674	0.00515339	0.00441396	0.00907546	0.0110055	0.00535459	0.0126931	0.00656472	0.00507131	0.00980644	0.00526723	0.00729751	0.00714054	0.00524667	0.0200641	0.0632795	0.0212433	0.00823269	0.0138036	0.00610674	0.204249	0.022043	0.0169687	0.0259018	0.0139376	0.0110819	0.0217928	0.0109151	0.0269366	0.0271211	0.0120755	0.00941941	0.00882078	0.0259018	0.01474	0.0649387	0.0124886	0.0127411	0.0108042	0.0144695	0.0101489	0.0132567	0.0136105
1	0.00180776	0.0036037	0.00224464	0.00250375	0.0027751	0.00746529	0.00674748	0.00453207	0.0032816	0.0103829	0.0121815	0.00463179	0.0161258	0.0061929	0.00420039	0.0110852	0.00437515	0.0067635	0.0071281	0.00451995	0.025589	0.0768815	0.0161032	0.00660875	0.0181434	0.00528216	0.266717	0.0227297	0.010993	0.0231363	0.0137096	0.0080853	0.020464	0.00848115	0.0269168	0.0259622	0.00816278	0.00650381	0.00601513	0.0231363	0.0114811	0.0753934	0.0101236	0.00919964	0.00767703	0.0111867	0.00676467	0.0101516	0.0105828
1	0.00247063	0.00383701	0.00300386	0.00389661	0.0032773	0.0137107	0.00945081	0.00769904	0.00565458	0.0119724	0.0147972	0.00559487	0.019386	0.0125519	0.0049793	0.0102568	0.00361097	0.00546631	0.00758853	0.00435279	0.0464141	0.110737	0.0126692	0.00657697	0.0157	0.0050825	0.276784	0.0223231	0.00903346	0.00456882	0.0123566	0.00574659	0.00877667	0.00658966	0.0332946	0.0215663	0.0054156	0.00498216	0.0045622	0.00456882	0.00981036	0.0947678	0.00934492	0.00806237	0.00503334	0.00665561	0.00498317	0.00930854	0.00769168
1	0.00228679	0.00401389	0.00278757	0.00374029	0.00328006	0.0145341	0.0106264	0.00778075	0.00564754	0.0123364	0.0164328	0.00563076	0.0211102	0.01299	0.00490892	0.0101604	0.00354434	0.00545522	0.00744731	0.00431984	0.0507581	0.113718	0.0131884	0.00640874	0.0142585	0.00470585	0.282777	0.0231079	0.00849007	0.00415484	0.011178	0.00518124	0.00841243	0.00619364	0.0338697	0.0203139	0.00498833	0.0045076	0.00414931	0.00415484	0.00927071	0.0931946	0.00807169	0.0074194	0.00447153	0.0060247	0.00437995	0.00891662	0.00689563
1	0.00454415	0.00601976	0.00513885	0.00571832	0.00680774	0.0136931	0.0125024	0.00969737	0.0083681	0.0123243	0.0165771	0.00830845	0.0180297	0.0127252	0.00800527	0.0110568	0.00706624	0.00887657	0.00953331	0.00803554	0.0346495	0.0700974	0.0228525	0.0107574	0.014568	0.00847667	0.192605	0.0209028	0.0173681	0.00848039	0.0129392	0.0106369	0.0111518	0.0101182	0.0248547	0.0180755	0.0108898	0.0100069	0.00972995	0.00848039	0.0134498	0.0627863	0.0127003	0.0123524	0.0102465	0.0107726	0.00969691	0.013161	0.0116602
1	0.00326134	0.00423509	0.0036798	0.00408987	0.00474019	0.00943141	0.00877423	0.00675172	0.00585851	0.0086449	0.0119569	0.00597108	0.0130794	0.00947604	0.00604262	0.00854873	0.00525492	0.00690306	0.00751978	0.00605043	0.0314279	0.0669428	0.0220147	0.00940173	0.0135254	0.0071284	0.221892	0.0226009	0.019594	0.00767735	0.0131053	0.00955479	0.0107235	0.00961921	0.0307047	0.0203084	0.0104338	0.00936687	0.00902515	0.00767735	0.013741	0.0846937	0.0129173	0.0120308	0.0091785	0.0102063	0.00877805	0.013888	0.0117334
1	0.00229839	0.00617611	0.00250013	0.00246017	0.00180173	0.013133	0.00740083	0.00752271	0.00366379	0.0177532	0.015777	0.00470329	0.0249728	0.0106877	0.00331986	0.0163273	0.00420329	0.00417335	0.00714199	0.0034137	0.0392819	0.118808	0.0111746	0.00557518	0.0228144	0.0045041	0.212851	0.021246	0.00642855	0.0357348	0.0192366	0.00606018	0.0403814	0.00596861	0.0225514	0.0173189	0.00464469	0.0045497	0.00374676	0.0357348	0.00752027	0.0634551	0.00662292	0.00636446	0.00623366	0.00976328	0.00420295	0.00719104	0.00668962
1	0.00266358	0.00511536	0.00290077	0.00313231	0.00316891	0.0116095	0.00714055	0.00758846	0.00477378	0.0185612	0.0146155	0.00601814	0.0233625	0.0111301	0.00521071	0.0183634	0.00596915	0.00552395	0.00819442	0.00521404	0.0354113	0.097062	0.0123976	0.00731489	0.0263301	0.00679512	0.18164	0.0205058	0.00893464	0.0318691	0.0215284	0.00831891	0.0360481	0.0075757	0.022059	0.0182417	0.00641335	0.00672667	0.00593197	0.0318691	0.00979123	0.0624224	0.0103782	0.00851466	0.00797828	0.0114284	0.00610912	0.00940975	0.0091146
1	0.0027444	0.00521473	0.00300914	0.00290198	0.00285687	0.0093432	0.00702943	0.00643	0.00385095	0.0137296	0.0138395	0.00498776	0.0171467	0.00869647	0.00415215	0.0133671	0.00503518	0.00620027	0.00680842	0.00489666	0.0294134	0.0788213	0.0203149	0.00720412	0.0214313	0.00615004	0.19388	0.0206854	0.0122801	0.0301357	0.0200991	0.00889204	0.0326451	0.0081177	0.0241256	0.0183523	0.00837995	0.00759772	0.00671815	0.0301357	0.0124067	0.0710054	0.0114264	0.00968613	0.00884385	0.0122866	0.00677779	0.0107353	0.00993262
1	0.00195889	0.00528394	0.00215991	0.00219672	0.00181205	0.00969985	0.0081074	0.00599529	0.00314412	0.0127578	0.0155898	0.0039648	0.0195881	0.00869177	0.00342116	0.0117066	0.00378203	0.00551937	0.00561786	0.00338086	0.0336576	0.092048	0.028093	0.00694946	0.0168891	0.00451107	0.203753	0.0218523	0.0173525	0.0348601	0.0160326	0.00726645	0.0341506	0.00706073	0.0257356	0.0167801	0.00752105	0.00643077	0.0058303	0.0348601	0.0110987	0.0676625	0.00802479	0.00769548	0.00769615	0.0103736	0.00528443	0.00920907	0.00767181
1	0.00444722	0.00674274	0.00477175	0.00445456	0.00556829	0.0112504	0.00841097	0.00704424	0.00670997	0.0139564	0.0130642	0.00701758	0.0224818	0.00899482	0.00642412	0.0131299	0.00671503	0.00790159	0.00880604	0.00707784	0.0279321	0.063581	0.0150975	0.00923971	0.0160535	0.00798399	0.151145	0.0246518	0.0125404	0.0266436	0.0168763	0.0147552	0.0231284	0.0134988	0.0319498	0.0256076	0.0107595	0.0111526	0.0101898	0.0266436	0.0198083	0.0444442	0.0158794	0.014135	0.0171497	0.0174548	0.013331	0.0155066	0.0146045
1	0.00266548	0.00444839	0.00296363	0.00278957	0.0034484	0.00798182	0.00586439	0.0049631	0.00471948	0.0109025	0.0102787	0.00507942	0.0187782	0.0071504	0.00474893	0.010545	0.00490354	0.00609769	0.00718233	0.00534481	0.0258424	0.0647725	0.0136098	0.00770854	0.0147226	0.0064945	0.1692	0.0252127	0.0122309	0.0306646	0.0170563	0.0136714	0.02605	0.012929	0.0377388	0.0296165	0.0103502	0.0105062	0.00932091	0.0306646	0.0207485	0.054298	0.0145154	0.0137209	0.0179563	0.0185441	0.0129479	0.0160603	0.0152233
1	0.00396627	0.006252	0.00458247	0.00452381	0.00581504	0.0115349	0.00969094	0.00787838	0.00666194	0.0172644	0.0167276	0.00794007	0.0259057	0.0100097	0.0073024	0.0159066	0.00809686	0.00945873	0.0101653	0.00833844	0.0321501	0.0661369	0.0198504	0.0102069	0.0190544	0.00922238	0.161434	0.0246063	0.0138462	0.0202011	0.0189212	0.0129392	0.019731	0.0125003	0.0295135	0.0246078	0.01038	0.0103396	0.00960011	0.0202011	0.0181786	0.043174	0.0149617	0.0127367	0.0143272	0.0141888	0.0107752	0.0128048	0.0126145
1	0.00364062	0.00532007	0.00390381	0.00395089	0.00481168	0.00959307	0.0074436	0.0064073	0.00556613	0.0141689	0.0131449	0.00659645	0.0205583	0.00846832	0.00591881	0.0136232	0.0061936	0.00805854	0.00905665	0.00697944	0.0278116	0.0619832	0.0157946	0.00877137	0.0178275	0.00774734	0.165547	0.0233779	0.0135497	0.022602	0.0188851	0.0135406	0.0212989	0.0124566	0.0331822	0.0285998	0.0105346	0.010766	0.00933529	0.022602	0.0197388	0.0526681	0.0146649	0.0132814	0.0162186	0.016288	0.0118289	0.0149742	0.0146663
1	0.00223111	0.0028285	0.00330613	0.00464978	0.00278998	0.0134714	0.00799371	0.0123577	0.00991851	0.0187076	0.0170039	0.00769518	0.0242733	0.0316792	0.007124	0.0176277	0.00356592	0.00593199	0.0116718	0.00440493	0.0442728	0.172867	0.0138066	0.0121397	0.0322602	0.00521867	0.147422	0.0208933	0.0233242	0.00446239	0.0218871	0.00473079	0.00593183	0.00514437	0.03573	0.0561804	0.0053816	0.006365	0.00563369	0.00446239	0.00661955	0.045531	0.00696647	0.00715849	0.00409539	0.00566694	0.00425476	0.00946396	0.0166587
1	0.0042013	0.00452592	0.00495848	0.0053213	0.00608505	0.0125742	0.010045	0.0127809	0.0110717	0.0153364	0.0162394	0.00855297	0.0198788	0.0258666	0.008357	0.0142908	0.00612739	0.00777239	0.0116169	0.00687769	0.034783	0.135935	0.0140143	0.0126458	0.0232878	0.00737486	0.123522	0.0213423	0.0221299	0.00720777	0.0189055	0.00843597	0.00861433	0.0080286	0.0371057	0.0504753	0.008531	0.00891333	0.00844707	0.00720777	0.0100377	0.0467336	0.00999425	0.0108325	0.00760574	0.00934515	0.00795365	0.0135051	0.0190688
1	0.00188754	0.00295536	0.0031241	0.00530176	0.00281493	0.0141612	0.013664	0.0146207	0.0105702	0.0174134	0.0248	0.00732677	0.0286664	0.0323079	0.00794201	0.0147326	0.00325849	0.00879744	0.0103104	0.00487664	0.049826	0.167529	0.0544181	0.013902	0.021791	0.00461341	0.141198	0.0219885	0.0271131	0.00356719	0.0156124	0.00384824	0.00477083	0.00463749	0.0316776	0.0402356	0.012265	0.00722512	0.00661731	0.00356719	0.00558973	0.0353506	0.00512269	0.00613585	0.00318291	0.00437164	0.00350135	0.00885164	0.013354
1	0.0025606	0.00333203	0.0034303	0.00457373	0.00362741	0.0107907	0.00995592	0.0106135	0.00846807	0.0128983	0.0176624	0.00678333	0.0206839	0.0231431	0.0075687	0.0127638	0.00448125	0.0075322	0.0099385	0.00536476	0.0403222	0.139141	0.0376938	0.0139952	0.0214196	0.00610591	0.141942	0.0243187	0.0268134	0.00599248	0.0178475	0.00646639	0.00712863	0.00660026	0.0382427	0.0470139	0.0130474	0.00942527	0.00926189	0.00599248	0.0084135	0.0451421	0.00811427	0.00925383	0.00552707	0.00695375	0.00599905	0.0127862	0.0184346
1	0.00340745	0.00502844	0.00334656	0.00327275	0.00375406	0.0144294	0.0121344	0.00908393	0.00553316	0.020633	0.0205934	0.00621055	0.0152986	0.0106237	0.0073639	0.0188281	0.00654217	0.0059342	0.00857124	0.00451685	0.0252224	0.0883431	0.00993097	0.01246	0.0209479	0.006378	0.143316	0.0178294	0.0220153	0.043972	0.0178888	0.00828225	0.0619912	0.00672142	0.0268664	0.0237558	0.0060342	0.00788713	0.00736546	0.043972	0.0111571	0.051481	0.00875208	0.00725326	0.0108631	0.0200997	0.00548339	0.00865574	0.0088085
1	0.00359388	0.00658605	0.0034092	0.00326239	0.00272782	0.0135346	0.0111645	0.0071572	0.00394555	0.017178	0.0198214	0.00509514	0.0152304	0.00872158	0.00590902	0.0162479	0.0053824	0.00505957	0.00693519	0.00351736	0.0260848	0.0819964	0.00965088	0.0107941	0.018945	0.00511674	0.163265	0.0186461	0.0200961	0.0515472	0.0155343	0.0076842	0.0625774	0.00572376	0.0300499	0.0218955	0.00502793	0.00676027	0.00626524	0.0515472	0.00998602	0.0574398	0.00783391	0.0063911	0.0105534	0.0190962	0.00435279	0.00809122	0.00767667
1	0.00537978	0.00674735	0.00509278	0.00484245	0.00585421	0.011971	0.0120639	0.00908249	0.00776946	0.0168124	0.0242319	0.00749511	0.0113001	0.0116589	0.00825435	0.0198457	0.00774542	0.0088575	0.00990653	0.00672585	0.0245731	0.0552521	0.0139629	0.0147631	0.0304136	0.00911695	0.115364	0.0163448	0.0293571	0.0129616	0.0197361	0.0108354	0.0207683	0.00943054	0.0244417	0.0272395	0.0093515	0.011765	0.0114102	0.0129616	0.012882	0.0659082	0.0154845	0.0116685	0.0109897	0.0164857	0.00878287	0.0137086	0.0159418
1	0.00327563	0.00625774	0.00311718	0.00295125	0.00267908	0.0107575	0.0148521	0.0075247	0.00564266	0.0164704	0.0338334	0.00508125	0.0120096	0.0115127	0.00606985	0.0187227	0.00496941	0.00806019	0.00698317	0.00376325	0.0317003	0.0669224	0.0219331	0.0152444	0.0260532	0.00537331	0.16048	0.0183887	0.037222	0.0117642	0.0174221	0.00640902	0.0230517	0.00663482	0.0293521	0.0266349	0.00810481	0.00915538	0.00889903	0.0117642	0.0102705	0.077205	0.0105506	0.00744268	0.00763036	0.0137043	0.00477311	0.0113845	0.0118392
1	0.00379785	0.00582834	0.00367319	0.00366996	0.00351563	0.0115574	0.0132057	0.00851545	0.00664145	0.017431	0.0292255	0.0056268	0.0117739	0.0127632	0.00692608	0.0208662	0.00541753	0.00601339	0.00800284	0.00432865	0.0305666	0.0775128	0.0105004	0.0158873	0.0284086	0.00559292	0.152167	0.0157632	0.0349882	0.0110655	0.0187879	0.00695096	0.0233072	0.00661411	0.027367	0.0297342	0.00552505	0.00874948	0.00856982	0.0110655	0.00955421	0.0764421	0.00930958	0.00759195	0.00782743	0.0142526	0.00531183	0.0114653	0.0139206
1	0.0051199	0.00801885	0.00524748	0.00487592	0.00567532	0.0159164	0.0186289	0.0115951	0.0113383	0.0231151	0.0359849	0.00749255	0.0146953	0.0160896	0.00908127	0.0243941	0.00683539	0.00737026	0.00970596	0.00559847	0.0326129	0.0854081	0.0121752	0.0180583	0.0293141	0.00676641	0.144578	0.0166507	0.0357941	0.0117773	0.0195649	0.00716002	0.0226128	0.00680838	0.0243232	0.0262868	0.00594979	0.00890693	0.0085664	0.0117773	0.00907984	0.0586623	0.00867322	0.00732342	0.00729322	0.0118605	0.00512493	0.00929374	0.0111541
1	0.00267552	0.00488043	0.00265662	0.00248712	0.00229447	0.0106366	0.00835328	0.00591162	0.00314613	0.0156571	0.017523	0.00463504	0.0122085	0.00748015	0.0051629	0.0152977	0.00477712	0.00529711	0.00676094	0.0032938	0.0220771	0.0734177	0.0110816	0.00977689	0.0205185	0.00499418	0.150399	0.0169409	0.0196414	0.0475094	0.0157318	0.00876343	0.0576148	0.00641144	0.0281174	0.0239884	0.00594497	0.00727852	0.0067285	0.0475094	0.010821	0.0621933	0.0101834	0.00705342	0.0110595	0.021563	0.00516115	0.010058	0.0105212
1	0.00259182	0.00460925	0.00277846	0.00273057	0.00270806	0.00970735	0.00842132	0.00597408	0.00360723	0.0150342	0.0179064	0.00511763	0.0129457	0.0080487	0.00599766	0.0156302	0.00553164	0.00613341	0.00763923	0.00426376	0.0243428	0.0746763	0.0126856	0.0109039	0.0216814	0.00588716	0.153562	0.0186093	0.0203385	0.041261	0.0159794	0.00926207	0.0515607	0.00708936	0.0288412	0.0232449	0.00676452	0.00779145	0.00749612	0.041261	0.011277	0.0581892	0.0108075	0.00794058	0.0111145	0.0198157	0.00594624	0.0108464	0.0106138
1	0.00475388	0.00627465	0.00523001	0.00559216	0.00726846	0.0126017	0.010536	0.00993145	0.00962891	0.0150274	0.0155652	0.0100166	0.0239799	0.0136549	0.00940446	0.013419	0.0084388	0.00990635	0.0120938	0.00918445	0.036148	0.0603478	0.0179945	0.0121376	0.0165728	0.0102011	0.169273	0.0267042	0.0141851	0.0102246	0.0148079	0.0130468	0.0125591	0.0134111	0.0309237	0.0192444	0.0114217	0.0110538	0.0102753	0.0102246	0.0164654	0.0422816	0.0137023	0.0150607	0.0124161	0.013068	0.0124352	0.0150141	0.0138418
1	0.00237746	0.00472427	0.00277913	0.00303584	0.00282417	0.0135168	0.00887838	0.00656953	0.00504111	0.0128233	0.0144191	0.00619164	0.0254285	0.010888	0.00559915	0.0112657	0.00398869	0.00594041	0.00849128	0.00473935	0.047147	0.0733853	0.0201609	0.00871608	0.0175921	0.00569608	0.242699	0.0364789	0.0110154	0.00567344	0.0146206	0.00703998	0.0090592	0.0104791	0.0503848	0.020988	0.00825186	0.00647864	0.00573957	0.00567344	0.0152176	0.068884	0.00871968	0.0121756	0.007606	0.00823977	0.00786461	0.0130665	0.00969933
1	0.0018572	0.0042746	0.00219015	0.00249097	0.00216381	0.0121244	0.00941005	0.00570822	0.00423512	0.0114352	0.0142325	0.00530047	0.0233137	0.00921215	0.00479111	0.00929223	0.00305373	0.00573757	0.00703175	0.00363888	0.0431099	0.0656618	0.0259755	0.0085976	0.0151855	0.00427975	0.247988	0.0333762	0.0171898	0.00482127	0.0137113	0.00594178	0.00790236	0.00971775	0.0465206	0.0205176	0.00943272	0.00742676	0.00669237	0.00482127	0.014368	0.0752827	0.00870813	0.0116963	0.00697336	0.00756151	0.00767574	0.015082	0.0111845
1	0.00149378	0.00398555	0.00187495	0.00216652	0.00171512	0.0121613	0.0096832	0.0053817	0.00394501	0.0122867	0.0154148	0.00494075	0.0260543	0.00903537	0.00442757	0.00945948	0.00240952	0.00560754	0.00641677	0.00327625	0.0460196	0.0646331	0.0279081	0.00815847	0.0160633	0.00357363	0.255261	0.0354245	0.0188033	0.00385084	0.0142066	0.00464816	0.00721318	0.0091587	0.047355	0.01998	0.00940897	0.00694636	0.00598905	0.00385084	0.0142988	0.0800287	0.00949803	0.0115058	0.00607932	0.00666104	0.00700921	0.0147068	0.0102213
1	0.00216397	0.00341187	0.00269388	0.00322383	0.00236478	0.0132724	0.00650019	0.00791684	0.00472117	0.0117547	0.0109	0.00625273	0.0118943	0.0134008	0.00433718	0.00918854	0.00317298	0.00421001	0.00784597	0.00351295	0.0371339	0.107497	0.00982942	0.00709419	0.0158121	0.00407772	0.226655	0.0212221	0.0115676	0.00492359	0.014459	0.00584987	0.00664349	0.00645499	0.0348366	0.0389355	0.00494035	0.00524907	0.00480627	0.00492359	0.0118627	0.082873	0.00784202	0.00855361	0.00785374	0.00703097	0.00615986	0.0139662	0.0188369
1	0.00310066	0.00452281	0.00374794	0.00438523	0.00391879	0.0152111	0.0079722	0.00968944	0.00652444	0.0142547	0.0127005	0.00835148	0.0144185	0.015725	0.00642681	0.0114423	0.00506043	0.00621758	0.010041	0.00533843	0.0384118	0.106826	0.0118062	0.00897808	0.0175389	0.00601755	0.206305	0.0208768	0.0124316	0.00656237	0.0144304	0.00818732	0.00806236	0.00778925	0.029424	0.0331118	0.00677578	0.00682343	0.0065657	0.00656237	0.0123976	0.0640679	0.00937759	0.0101623	0.00914639	0.00871534	0.00786645	0.0133252	0.0170138
1	0.00142811	0.00246632	0.00207943	0.00251853	0.0016593	0.0126014	0.00623433	0.00720878	0.00421857	0.0136951	0.0119912	0.00664283	0.0133579	0.0144686	0.00448841	0.0113043	0.00300617	0.00483418	0.00931546	0.00354238	0.042607	0.121496	0.0133708	0.00724492	0.0201202	0.0041567	0.250896	0.0206372	0.0120562	0.00579899	0.0146339	0.00544169	0.00675529	0.00595379	0.0304333	0.0362484	0.00547044	0.00504691	0.00466079	0.00579899	0.0105588	0.0754851	0.00692507	0.00755476	0.00686092	0.0062113	0.0051544	0.0115735	0.0165305
1	0.00141461	0.00283881	0.0020085	0.00277164	0.00157986	0.0139952	0.00816679	0.00803647	0.00441245	0.0134023	0.0143958	0.00597534	0.0159991	0.0144386	0.00424568	0.00983072	0.0026168	0.00513727	0.0079929	0.00321067	0.0467331	0.118335	0.0245014	0.0076647	0.0164588	0.0033334	0.272372	0.0224059	0.0153527	0.0044603	0.0127434	0.00416875	0.0061077	0.00529657	0.030342	0.0309305	0.00683457	0.00483571	0.00415847	0.0044603	0.0094901	0.0725972	0.00677407	0.00687304	0.00600474	0.00544578	0.00457805	0.0103434	0.0133143
1	0.00458739	0.00548657	0.00505076	0.00522806	0.00591037	0.0108438	0.00894288	0.00845328	0.00679545	0.0104492	0.0115757	0.00785896	0.0167811	0.0103171	0.00742482	0.0103312	0.00687959	0.00758922	0.00907556	0.00718167	0.030251	0.0688588	0.0126201	0.0095843	0.0160285	0.00858136	0.202485	0.0202509	0.0129319	0.0119945	0.014404	0.0106845	0.0121521	0.0094064	0.031961	0.0217547	0.00904633	0.00901749	0.00845266	0.0119945	0.0127083	0.068725	0.0141889	0.0115816	0.00992939	0.011391	0.00947719	0.0131595	0.0128727
1	0.0024099	0.00354208	0.00284187	0.00313022	0.00291987	0.00908199	0.00712475	0.00642643	0.0042741	0.00944646	0.0114637	0.00542983	0.0192837	0.00927581	0.00445563	0.00868812	0.00363449	0.00488346	0.00662494	0.00401548	0.0383839	0.095981	0.0112567	0.00737112	0.0133568	0.00488569	0.273416	0.0219552	0.0104476	0.0104436	0.0116287	0.00568506	0.00992255	0.00575138	0.0400118	0.023307	0.00486391	0.00513102	0.00476091	0.0104436	0.00866712	0.0838226	0.00808115	0.00710536	0.00574386	0.0077502	0.00500709	0.0106005	0.00993829
1	0.001463	0.00206657	0.00152906	0.00165327	0.00132496	0.00501996	0.00458342	0.0034975	0.00219264	0.00524197	0.00805694	0.00333947	0.0120777	0.00633205	0.00316432	0.00599391	0.00238926	0.00397004	0.00505796	0.00282531	0.0327644	0.083899	0.0228367	0.00771942	0.0118029	0.00431121	0.292161	0.0229357	0.0189815	0.00850208	0.011841	0.00591495	0.00916235	0.00596879	0.0408307	0.0232817	0.0077139	0.00697795	0.00685905	0.00850208	0.00899584	0.0884443	0.00818118	0.00779034	0.00619853	0.00764738	0.00494046	0.0111869	0.0105401
1	0.00124754	0.00288312	0.00197514	0.00232017	0.00149385	0.00820271	0.0097875	0.00600898	0.00340631	0.00805632	0.0160008	0.00498827	0.0228109	0.00955902	0.00434823	0.00732307	0.00288805	0.00541531	0.00615104	0.00358202	0.0446379	0.094032	0.0311419	0.00935809	0.011724	0.0047606	0.291767	0.0239364	0.0247513	0.00686802	0.0103274	0.00479386	0.00837615	0.00556206	0.0376098	0.0182024	0.0070834	0.00687372	0.00650669	0.00686802	0.00774281	0.0705431	0.00676285	0.00656919	0.00486927	0.00582733	0.00377025	0.00869513	0.00702677
1	0.00163034	0.00198983	0.00220939	0.00272375	0.00249559	0.00884932	0.0064238	0.00769182	0.0115101	0.018734	0.0134311	0.0068373	0.0306777	0.0235637	0.0108411	0.0190677	0.00338315	0.0065343	0.0118758	0.00424504	0.0443349	0.109163	0.0257002	0.016362	0.0377723	0.00498669	0.125624	0.042819	0.0249831	0.00423094	0.0305183	0.00447874	0.00595528	0.00717551	0.0564226	0.044937	0.0105226	0.00779179	0.00787697	0.00423094	0.00958886	0.0437952	0.00628723	0.0162675	0.00440201	0.00598495	0.00571702	0.0198473	0.0141924
1	0.00463186	0.00605978	0.00601173	0.00738176	0.00530436	0.0179397	0.0112853	0.0166049	0.0114297	0.0197656	0.021844	0.009602	0.0156389	0.0308521	0.00959702	0.0196158	0.00533791	0.00811351	0.013596	0.00636825	0.0388838	0.123671	0.0133709	0.0141945	0.0255758	0.00658304	0.12014	0.0232072	0.0229955	0.00587504	0.0209177	0.00752051	0.00705651	0.00727957	0.0386727	0.0353843	0.00824978	0.00859836	0.00831665	0.00587504	0.00998334	0.0459731	0.0091264	0.0126715	0.00644652	0.00675712	0.00746618	0.0175261	0.0138948
1	0.00291921	0.00366078	0.00373044	0.00442787	0.00386798	0.0123276	0.00880485	0.00868698	0.0108812	0.0151902	0.0138226	0.00701247	0.0256455	0.0193129	0.0104016	0.0151954	0.00454699	0.00755177	0.0107003	0.00505538	0.0371286	0.0865427	0.0290487	0.0165109	0.0294656	0.00641038	0.108792	0.0409213	0.0249886	0.00684604	0.026794	0.00774028	0.00781032	0.0093288	0.0540018	0.038659	0.0144991	0.0106426	0.010731	0.00684604	0.0117709	0.0407243	0.0099684	0.0182981	0.00711063	0.00812597	0.00835458	0.0230543	0.0164861
1	0.00385441	0.00507745	0.00512529	0.00587437	0.0057088	0.0145631	0.0119651	0.010515	0.0127278	0.0170161	0.0160424	0.00855858	0.0278375	0.0209473	0.011893	0.0164231	0.00557729	0.00929093	0.0118538	0.00640399	0.0385379	0.0883617	0.0332799	0.0174295	0.0267958	0.00706361	0.102961	0.0385058	0.0239359	0.00679528	0.0237058	0.00783788	0.00808594	0.00916602	0.0479327	0.033869	0.0145886	0.0103364	0.0105378	0.00679528	0.0113778	0.0343002	0.00905243	0.0163418	0.00719732	0.00813686	0.00827226	0.0201141	0.0143612
1	0.00306071	0.00578097	0.00364235	0.00376105	0.00403627	0.0141605	0.00776554	0.00788452	0.00567412	0.0110046	0.0161464	0.00675106	0.0133357	0.0134634	0.00589034	0.010908	0.00540054	0.00701146	0.00994611	0.00507981	0.0339592	0.0839025	0.0142747	0.0107083	0.0146905	0.0061741	0.147667	0.0384061	0.0156492	0.00747127	0.012572	0.00818367	0.011938	0.0103652	0.0713802	0.0294189	0.00899866	0.00753614	0.00735754	0.00747127	0.0229617	0.0505433	0.0100684	0.0166284	0.0122122	0.0115188	0.00944266	0.0285799	0.0134053
1	0.00459214	0.00644339	0.00481623	0.0047758	0.00553629	0.0141148	0.00846198	0.00873252	0.00692251	0.0122543	0.0152172	0.00803548	0.0142049	0.0136949	0.00771666	0.0131197	0.00709738	0.00872655	0.011281	0.00660226	0.0322544	0.0766051	0.0159854	0.0124102	0.0191684	0.00815094	0.132519	0.0356471	0.0162949	0.00873304	0.0143589	0.00977126	0.0121655	0.0114421	0.0596235	0.026822	0.0103503	0.00929434	0.00910982	0.00873304	0.0210186	0.0437407	0.0135403	0.0170868	0.0128176	0.0123108	0.0107514	0.0257821	0.0138704
1	0.00252016	0.00457557	0.00296757	0.00284564	0.00301456	0.0124435	0.00690203	0.00648158	0.004196	0.0116412	0.0155941	0.00613918	0.0130572	0.0119033	0.00566131	0.0125438	0.00517074	0.00746039	0.0100067	0.0048281	0.0358784	0.0809394	0.0197078	0.010811	0.0206975	0.00647506	0.160172	0.037396	0.0162898	0.00718495	0.014803	0.00698453	0.011624	0.00996261	0.0673776	0.0291288	0.00993961	0.008163	0.00761977	0.00718495	0.0215163	0.0533584	0.0131214	0.0159158	0.0108751	0.0104379	0.00868431	0.028915	0.0130375
1	0.00385664	0.00685039	0.00426898	0.00450685	0.00595569	0.0151785	0.0109031	0.00849997	0.00663573	0.0117384	0.0181461	0.00771297	0.0146383	0.0141192	0.00727814	0.0112639	0.00653435	0.00896616	0.0103067	0.00628044	0.0318749	0.0736643	0.0286052	0.0128764	0.0138398	0.00744395	0.123403	0.0348837	0.0205668	0.00900215	0.0137311	0.0105481	0.0119932	0.0117044	0.0564337	0.0252613	0.0134944	0.0124113	0.012042	0.00900215	0.021529	0.0413269	0.0127548	0.0172733	0.0130587	0.0125395	0.0112363	0.0248329	0.0133687
0	0.00296556	0.00412532	0.00370911	0.00426027	0.00447537	0.00960088	0.00870902	0.00704117	0.00630429	0.0109708	0.0114702	0.0063604	0.0259873	0.0109306	0.0116695	0.0108902	0.00540524	0.00655354	0.0081745	0.00613055	0.0550951	0.0755467	0.0255473	0.00957995	0.0181606	0.00693416	0.235823	0.0294953	0.00977763	0.0101366	0.0144227	0.00861678	0.0106135	0.00774407	0.0280639	0.0206264	0.00753173	0.0075373	0.00678427	0.0101366	0.0113902	0.0514347	0.0110763	0.00961576	0.00922693	0.00949018	0.00783522	0.0105754	0.0110355
0	0.0031674	0.0043479	0.00383404	0.00453327	0.00488762	0.00978349	0.00895337	0.00734249	0.00658662	0.0108909	0.0109255	0.00645578	0.0242453	0.0107248	0.0113834	0.0105423	0.00546484	0.00686386	0.00827572	0.00640132	0.0527476	0.0752443	0.0238941	0.00935704	0.0183232	0.00685683	0.232942	0.0288231	0.00974626	0.0105374	0.0146919	0.0087627	0.010859	0.00791838	0.0276389	0.0208815	0.00747664	0.00745909	0.00692401	0.0105374	0.0116706	0.0521755	0.0112475	0.0099363	0.00989924	0.0100393	0.00813825	0.010776	0.0117803
0	0.000688024	0.00146416	0.00106721	0.00187818	0.00111392	0.00912991	0.00802912	0.00488655	0.0035748	0.0127272	0.0131389	0.00409649	0.0319587	0.0103777	0.0104791	0.0102756	0.002149	0.00463804	0.00626714	0.00368794	0.0696868	0.0966928	0.0316234	0.00735347	0.0206122	0.00368192	0.275219	0.0338584	0.00991801	0.00718186	0.0176696	0.00415409	0.00788029	0.00502037	0.0368669	0.0259903	0.00485849	0.00485465	0.00389016	0.00718186	0.00761484	0.0713474	0.00724104	0.00586257	0.00478074	0.00497163	0.00344326	0.00754527	0.00909105
0	0.000714396	0.00155216	0.00112976	0.00196813	0.00109326	0.00988262	0.00840457	0.0051011	0.00386113	0.0137124	0.013561	0.00430511	0.0343657	0.010704	0.010931	0.010866	0.00208235	0.0044193	0.00625371	0.00358676	0.0720189	0.0988565	0.031234	0.00701352	0.0205298	0.00339608	0.275909	0.0334599	0.00912351	0.00698432	0.0170602	0.00371534	0.0077451	0.00461144	0.036484	0.0255176	0.00433627	0.004639	0.00365844	0.00698432	0.00727597	0.0701302	0.0065196	0.0055887	0.00455154	0.00475898	0.00327043	0.00720443	0.00892034
0	0.00305065	0.00498459	0.00424375	0.00389386	0.00396102	0.020382	0.00841798	0.00666485	0.00568759	0.0223706	0.0108925	0.00553382	0.0229492	0.0108601	0.00547504	0.0245642	0.00793515	0.00622211	0.00752692	0.00735457	0.0326729	0.0596118	0.0140871	0.00734439	0.0362593	0.00867183	0.0945776	0.022166	0.00788193	0.058704	0.0345793	0.0185032	0.0976835	0.0156045	0.0244913	0.00966968	0.00690975	0.00698422	0.00630539	0.058704	0.0145359	0.0206393	0.0162543	0.0083629	0.0177607	0.012025	0.00867488	0.00889799	0.00719441
0	0.00290757	0.0051497	0.00426452	0.00377052	0.00318013	0.023206	0.00831259	0.00620894	0.0050399	0.0221419	0.00992787	0.00443626	0.0223691	0.0102704	0.00460456	0.0232245	0.0072263	0.00503765	0.00618367	0.00597593	0.0309642	0.058466	0.0131394	0.0063637	0.0348756	0.00736946	0.0930431	0.0226546	0.00672136	0.0673657	0.0356795	0.0185656	0.108984	0.0148495	0.0236489	0.00811174	0.00566805	0.00574393	0.00489821	0.0673657	0.0130531	0.0208618	0.0161448	0.00737186	0.0201884	0.01276	0.00815898	0.00731177	0.00639327
0	0.00173543	0.0029508	0.00244004	0.00227217	0.00186591	0.0137845	0.00551591	0.00418028	0.00284431	0.0176645	0.00816881	0.00356189	0.0170239	0.00700913	0.00358927	0.0210326	0.00548167	0.0048891	0.00563546	0.00508243	0.0274773	0.0584718	0.0130567	0.00588021	0.0377462	0.00807799	0.103721	0.0213877	0.00835128	0.0636448	0.0399583	0.0210977	0.111743	0.0176006	0.0273433	0.0117855	0.00701777	0.00791922	0.00682061	0.0636448	0.0153402	0.0284981	0.0192015	0.00861374	0.0196871	0.0147221	0.00869487	0.00909451	0.00656859
0	0.00150294	0.00297255	0.00214482	0.00208079	0.00143049	0.0138463	0.00677478	0.00393309	0.00265733	0.0156643	0.00908242	0.00280711	0.0164779	0.00664235	0.00303864	0.0178956	0.00500783	0.00541614	0.00471097	0.00432175	0.0270282	0.0571321	0.0169216	0.00559852	0.0313388	0.00613224	0.101951	0.0221856	0.00914344	0.0716565	0.0355788	0.0205855	0.115877	0.0172912	0.0307893	0.0102496	0.00674224	0.00763821	0.0064258	0.0716565	0.0174807	0.0277015	0.0188724	0.00791761	0.0210585	0.014361	0.00865066	0.00858613	0.00605761
0	0.00362129	0.0105063	0.00434634	0.00359937	0.00249146	0.0265048	0.0111247	0.00687052	0.00540471	0.0334871	0.0153769	0.00481524	0.0255484	0.0100935	0.00629878	0.0264648	0.0077416	0.00437495	0.00597748	0.00347177	0.0367058	0.0565958	0.0188614	0.00609247	0.0308633	0.00513482	0.126112	0.0185066	0.00603285	0.0716948	0.0211528	0.00744487	0.0836291	0.00763427	0.0193455	0.00945474	0.00496877	0.00486721	0.0037532	0.0716948	0.0103682	0.0283222	0.00570371	0.0053108	0.0147087	0.0145081	0.0054355	0.00637156	0.0058716
0	0.00279097	0.00555022	0.0032756	0.00303192	0.00327705	0.0166231	0.00924222	0.00679179	0.00582429	0.0310354	0.0151717	0.00586626	0.0244515	0.0106645	0.00721889	0.0261261	0.00908311	0.00564846	0.00706637	0.00515601	0.035379	0.0539316	0.0193297	0.0074688	0.0303928	0.00686325	0.120305	0.0191868	0.00778166	0.0691922	0.0216072	0.00996296	0.081066	0.00909674	0.0196132	0.0110094	0.00666392	0.00688589	0.00571724	0.0691922	0.0125971	0.02872	0.00817845	0.00763979	0.0156016	0.0157448	0.00758838	0.00854595	0.00710712
0	0.00205506	0.00573701	0.00226892	0.00200973	0.00143692	0.0135473	0.00725775	0.00423172	0.00315667	0.0192955	0.0117979	0.00354477	0.015481	0.00693894	0.00439108	0.0173876	0.00564448	0.00457779	0.00481743	0.00295174	0.0275574	0.048252	0.0174559	0.00575574	0.0243378	0.00490366	0.125932	0.017855	0.00821298	0.0794205	0.0192899	0.00956933	0.0846929	0.00884956	0.0233409	0.0130779	0.00627632	0.00629669	0.00528835	0.0794205	0.0143268	0.039373	0.00773507	0.00718594	0.0181702	0.0206433	0.00779779	0.00965895	0.00835714
0	0.00306532	0.00751329	0.00307377	0.00268087	0.00197972	0.0159925	0.00861996	0.00520347	0.00384271	0.0221249	0.0129197	0.00414044	0.0166468	0.00770306	0.0049089	0.0184756	0.00595443	0.00496445	0.00529218	0.00348734	0.0274058	0.0468128	0.0178025	0.00619665	0.0244144	0.00525709	0.119764	0.0180001	0.00888011	0.071856	0.0192113	0.0103293	0.0760426	0.00942818	0.0235793	0.0133432	0.00714711	0.00717321	0.00608051	0.071856	0.0157326	0.0388025	0.00903364	0.00817082	0.0183491	0.0202403	0.00882709	0.0105277	0.00884475
0	0.00319246	0.00530603	0.00376682	0.00417361	0.00401335	0.0161044	0.0104323	0.00608861	0.00605984	0.0140038	0.0109351	0.00521346	0.0302838	0.00899557	0.00918404	0.0124462	0.00613545	0.00590977	0.00631576	0.00585783	0.0440736	0.0262016	0.0202923	0.00747156	0.0183421	0.00725777	0.109595	0.0288178	0.00843898	0.0766605	0.0203131	0.0154685	0.0479222	0.0109003	0.0324515	0.0102951	0.00822881	0.00855787	0.00756447	0.0766605	0.0132945	0.0336204	0.0172997	0.0108522	0.0190479	0.0138617	0.00916031	0.0132469	0.00939585
0	0.00458157	0.00704766	0.00521034	0.00568694	0.00583278	0.0196729	0.0123471	0.00825561	0.00825253	0.0167846	0.0125697	0.00714232	0.0307081	0.0106141	0.0106335	0.0139164	0.00786562	0.00735046	0.0078192	0.00755971	0.0403944	0.0259662	0.0194462	0.00880812	0.0183072	0.00855124	0.0960224	0.025463	0.00971943	0.0678519	0.0192488	0.0153971	0.0430382	0.0113607	0.0280133	0.0110533	0.00905635	0.00932947	0.00865446	0.0678519	0.0140318	0.0293691	0.0167624	0.0115234	0.018302	0.01408	0.0100895	0.0133984	0.0102762
0	0.000308721	0.0023	0.00121466	0.00210285	0.00121998	0.0144097	0.010013	0.00382785	0.00430379	0.0124455	0.0148456	0.00308996	0.0356154	0.00855501	0.00878696	0.0100029	0.00389808	0.00612432	0.00436269	0.00433758	0.0558407	0.0312445	0.0299268	0.00923029	0.0169084	0.00433412	0.137983	0.0325618	0.017792	0.0777815	0.0188429	0.0133544	0.0463906	0.010548	0.0388518	0.0087314	0.00736822	0.0102386	0.00820499	0.0777815	0.02165	0.0339428	0.0165823	0.00854856	0.0153143	0.00962903	0.0066298	0.0108987	0.00551215
0	0.00143479	0.00326049	0.00171584	0.00223663	0.00118652	0.0133165	0.00914412	0.00379541	0.00381562	0.0116994	0.0103697	0.00295279	0.0263063	0.00711568	0.00707262	0.00997633	0.00373223	0.00411123	0.00424268	0.00363965	0.0469185	0.0311985	0.0229386	0.00671386	0.0170148	0.0043283	0.136167	0.0313275	0.0101646	0.0866952	0.0191706	0.0127977	0.0527365	0.0091421	0.038596	0.0100504	0.00644058	0.0075868	0.00612153	0.0866952	0.0146844	0.0393091	0.0137687	0.00886116	0.0181042	0.0127085	0.00697204	0.0131514	0.00697437
0	0.000992372	0.00230342	0.00152875	0.00293799	0.00153444	0.0101801	0.00699145	0.00527767	0.00492636	0.0107081	0.00970983	0.00442615	0.0368082	0.0123773	0.00820043	0.0107846	0.00420336	0.00402194	0.00630732	0.0036144	0.0728026	0.0921422	0.0230228	0.00690708	0.0174172	0.00448359	0.205378	0.0252004	0.00604634	0.0575169	0.0124359	0.0073052	0.0745225	0.00777095	0.0202277	0.00931384	0.0053257	0.00456569	0.00389092	0.0575169	0.00850293	0.0299476	0.0075445	0.00524237	0.00963254	0.0101197	0.0038261	0.00532277	0.00447832
0	0.00106545	0.00186755	0.0012453	0.0024378	0.00133163	0.0102544	0.00699945	0.00481378	0.00483394	0.0108553	0.00937163	0.00400349	0.0331653	0.010793	0.00721399	0.00959373	0.00386582	0.00371877	0.00554751	0.00339935	0.0619479	0.0754666	0.020472	0.00636683	0.0155933	0.00448652	0.170759	0.0246047	0.00674065	0.0706262	0.0147525	0.00931277	0.0866333	0.00971136	0.0251434	0.0113735	0.00561596	0.00531007	0.004484	0.0706262	0.00924589	0.0370608	0.00883192	0.00636175	0.0115613	0.0121911	0.00479214	0.00697062	0.00534936
0	0.000928151	0.00203418	0.00123167	0.00250141	0.00119598	0.010074	0.00827098	0.00469676	0.00412654	0.00966131	0.0103953	0.00358957	0.0306312	0.00951829	0.0062728	0.00819101	0.00344311	0.00413919	0.00506014	0.00373879	0.0589479	0.0685001	0.0262755	0.00736179	0.0140369	0.00441933	0.191997	0.0252932	0.0117689	0.0615437	0.0143624	0.00978957	0.07191	0.0103893	0.0289552	0.0119905	0.00673244	0.0065194	0.00534267	0.0615437	0.0125988	0.0412443	0.00990542	0.00647662	0.0109099	0.0109209	0.00472777	0.00727719	0.00520232
0	0.000987833	0.00199075	0.00122528	0.00241871	0.00118959	0.00969543	0.00763453	0.00466175	0.00394347	0.00934027	0.00951444	0.0036914	0.0267586	0.00908232	0.00596454	0.00805911	0.00340437	0.00409489	0.005637	0.0040041	0.0554319	0.069405	0.0221474	0.0068797	0.0157827	0.00504021	0.192334	0.0244802	0.0100081	0.0578178	0.0161977	0.00964443	0.0715498	0.0104647	0.0287975	0.0138455	0.00675069	0.00669251	0.00573155	0.0578178	0.0117555	0.0469484	0.0099562	0.00711763	0.0109347	0.0123482	0.00524173	0.00823286	0.00601757
0	0.00231036	0.00364571	0.00287024	0.00424593	0.00320037	0.0160161	0.0096115	0.00900548	0.00583747	0.0110433	0.0155847	0.00638942	0.0181484	0.0134587	0.0111808	0.00977664	0.00383353	0.00564287	0.00855197	0.00551792	0.0430465	0.114025	0.0252567	0.00962035	0.0151554	0.00611924	0.238674	0.0302913	0.0113091	0.00628844	0.0137868	0.00789478	0.00915842	0.00941052	0.0336702	0.0243641	0.00674667	0.00582287	0.0053136	0.00628844	0.0126781	0.0599565	0.0112356	0.00847918	0.00838233	0.00681104	0.00813969	0.00962491	0.00939697
0	0.00245752	0.00332135	0.00290234	0.00395995	0.00364616	0.0122061	0.00842796	0.00792611	0.00557663	0.0099967	0.0145531	0.00647035	0.0168687	0.0121763	0.0102597	0.00938597	0.00446443	0.00612377	0.00876456	0.00568498	0.0417778	0.103966	0.0236958	0.00912198	0.0159655	0.00635962	0.241905	0.0289137	0.0108361	0.00630197	0.0131643	0.0077209	0.00910989	0.00928773	0.0342394	0.024851	0.00660242	0.00566823	0.00545036	0.00630197	0.0129435	0.0660093	0.0114068	0.00887865	0.00856997	0.00706515	0.00867418	0.0106166	0.00990779
0	0.00297013	0.00381255	0.00334508	0.00431326	0.00400983	0.0129108	0.0104214	0.00821512	0.0056481	0.00963963	0.0147643	0.00633132	0.0150921	0.0116469	0.00951953	0.0089842	0.00461811	0.00682585	0.00807244	0.00586897	0.0374126	0.0953155	0.0373068	0.0106067	0.0128063	0.00723328	0.225328	0.0260321	0.0187997	0.00744887	0.0128667	0.00933321	0.00974565	0.0106623	0.0293795	0.0225121	0.0103778	0.00914442	0.00846657	0.00744887	0.0139062	0.0555099	0.0127016	0.0104738	0.0103968	0.00837591	0.00915742	0.0106302	0.0107976
0	0.00174286	0.00261062	0.00216729	0.0030478	0.00239036	0.0101738	0.00882481	0.00661637	0.00427871	0.00843699	0.0153282	0.00518009	0.0161516	0.0106865	0.00834717	0.00799482	0.00339694	0.00611532	0.00717518	0.0051776	0.0419966	0.0930299	0.0372056	0.00945639	0.0157303	0.0053484	0.258355	0.0291004	0.0181378	0.00558079	0.012915	0.00685647	0.00835031	0.00902888	0.0326422	0.0223026	0.00862848	0.00730273	0.00621582	0.00558079	0.0126768	0.0677672	0.012652	0.00885504	0.00812604	0.00626681	0.00768817	0.00996878	0.00923595
0	0.00258237	0.00432494	0.00361248	0.00369084	0.00368112	0.0182328	0.00850524	0.00829041	0.00604491	0.0211346	0.0192756	0.00712631	0.0160822	0.0134225	0.00783134	0.0273214	0.00472644	0.00786903	0.0109309	0.00549192	0.040427	0.0775329	0.0165169	0.00992657	0.0388901	0.00791355	0.190472	0.0330326	0.0114453	0.00768239	0.0319161	0.00858923	0.0108733	0.0116472	0.0349278	0.0215951	0.00734337	0.00688917	0.00623258	0.00768239	0.0144583	0.0502549	0.00917845	0.00977745	0.00870717	0.0100421	0.00758013	0.0123637	0.0103047
0	0.003064	0.00448881	0.0038932	0.00402911	0.00463844	0.013916	0.00855431	0.00759098	0.00627071	0.016657	0.0176405	0.00687118	0.0154545	0.0115349	0.00730767	0.0222921	0.00568656	0.00837525	0.0101946	0.00632186	0.0401677	0.0613788	0.0169763	0.00957399	0.032768	0.00832142	0.192393	0.0346022	0.0109381	0.00792064	0.0286532	0.00908744	0.0112834	0.012317	0.0357673	0.0193325	0.00770754	0.00711373	0.00638162	0.00792064	0.0159526	0.054442	0.01025	0.0105129	0.0100011	0.011386	0.00855259	0.0138251	0.0107694
0	0.00129077	0.00331033	0.00244918	0.00244428	0.00186154	0.0158316	0.00945936	0.00614217	0.00409689	0.0183297	0.0214118	0.00539988	0.0154095	0.011583	0.00577925	0.0241557	0.00349342	0.00967585	0.00912072	0.00417279	0.0430773	0.0744401	0.0257229	0.00960455	0.0372644	0.00682143	0.210165	0.0345439	0.0172993	0.00657607	0.030516	0.00747088	0.0100587	0.0114443	0.0353288	0.0209939	0.00855752	0.00825292	0.00696895	0.00657607	0.0139514	0.0561468	0.00835149	0.00932539	0.00796036	0.00895249	0.00648194	0.0116324	0.00941019
0	0.00109515	0.00227348	0.00169878	0.00179553	0.00152299	0.00982328	0.00670403	0.00416423	0.0030083	0.012728	0.0168535	0.00402607	0.0138239	0.00859882	0.0047553	0.0186328	0.00277729	0.00823882	0.00720514	0.00348987	0.0429013	0.0619581	0.0255588	0.00834572	0.0322967	0.00588807	0.229887	0.038507	0.0160529	0.00630314	0.0277958	0.00710156	0.00979759	0.0120633	0.0415466	0.0202762	0.00871417	0.00781556	0.00629349	0.00630314	0.0159124	0.0700855	0.00938998	0.0100607	0.0084553	0.0100264	0.00688203	0.0142049	0.00974635
0	0.00191219	0.00239372	0.00290152	0.00396836	0.0022777	0.0125744	0.00728119	0.00964438	0.00904492	0.0123795	0.0143189	0.00699258	0.0207466	0.0233663	0.0121567	0.0127743	0.0028705	0.00565135	0.00995446	0.0037635	0.0502623	0.101998	0.0229774	0.0153733	0.0288361	0.00475025	0.20725	0.0366	0.0221878	0.00395264	0.0165067	0.00420375	0.00498736	0.00519705	0.0472844	0.0282323	0.00802176	0.00674568	0.00717389	0.00395264	0.00631624	0.0520876	0.00641515	0.0128889	0.00394048	0.00505701	0.0042067	0.0188341	0.0121832
0	0.00230515	0.00288511	0.00346762	0.00478497	0.00238404	0.0150794	0.00927485	0.0109025	0.0101677	0.0124935	0.0174613	0.00751479	0.0230039	0.0251657	0.0133848	0.0120326	0.00292901	0.00616256	0.0104993	0.00410201	0.053162	0.0989835	0.0252899	0.0160113	0.023781	0.00475148	0.197555	0.0388899	0.0224267	0.00436415	0.0149716	0.00489453	0.00536948	0.00573694	0.0495296	0.0252596	0.00837204	0.00701767	0.0072639	0.00436415	0.00681625	0.0462457	0.00658093	0.0125784	0.00428091	0.00534859	0.00440037	0.0183499	0.010606
0	0.00136797	0.00191606	0.00230264	0.00367695	0.00162597	0.0134471	0.0103415	0.0106541	0.00951031	0.0142943	0.0204368	0.00718876	0.0255718	0.0250947	0.0131209	0.0140871	0.00300156	0.00770196	0.010485	0.00466987	0.059008	0.100971	0.0396383	0.0167888	0.0299092	0.00601725	0.206253	0.0360861	0.0257739	0.00369844	0.0171754	0.00388936	0.00549952	0.0055349	0.0416705	0.023133	0.0101101	0.00798686	0.00792246	0.00369844	0.00619229	0.0424929	0.00632753	0.0109028	0.00339371	0.00400977	0.0035221	0.0146266	0.00863465
0	0.00164269	0.00218623	0.00262731	0.00384318	0.00213286	0.0115275	0.0108717	0.00914978	0.00895414	0.0100299	0.0172227	0.00647379	0.021349	0.02195	0.0131287	0.0103784	0.00363554	0.007617	0.00928024	0.00483854	0.049827	0.0859151	0.0445604	0.0184783	0.0214083	0.00600138	0.184372	0.0389694	0.032827	0.00560161	0.0155688	0.00644377	0.00667221	0.00801085	0.046304	0.0241996	0.0132868	0.0118492	0.0119659	0.00560161	0.00849162	0.0417915	0.00726938	0.0135065	0.00545316	0.00597935	0.00573258	0.0173794	0.0104958
0	0.00326405	0.00392108	0.00397139	0.00550754	0.00368001	0.0142783	0.00957597	0.0108569	0.00998051	0.0129275	0.0157108	0.00756359	0.0198615	0.0237945	0.00784258	0.0117333	0.00446588	0.00644932	0.0105055	0.00502323	0.0416244	0.11903	0.0141399	0.0104656	0.0172285	0.00577175	0.158589	0.0230836	0.016139	0.00717967	0.0130261	0.00689444	0.0101113	0.00765311	0.0366981	0.0368762	0.0070855	0.00666945	0.00637071	0.00717967	0.014288	0.0550425	0.00861009	0.0114237	0.00906132	0.0116553	0.0106522	0.0163339	0.0152701
0	0.00427834	0.00518122	0.00565703	0.00712855	0.00528713	0.0180389	0.0123919	0.0141843	0.0129057	0.0162851	0.0189171	0.00964448	0.0250115	0.0273844	0.0105981	0.0137679	0.00589958	0.00802934	0.0118444	0.00674896	0.045873	0.118433	0.0175084	0.012601	0.0187916	0.00736859	0.146114	0.0230194	0.0164042	0.00797652	0.0136456	0.00872776	0.0108415	0.00869519	0.0291518	0.0307557	0.00814731	0.00775571	0.00738493	0.00797652	0.0132689	0.0402889	0.011032	0.0112838	0.00915499	0.0108106	0.0107109	0.0123277	0.0124895
0	0.00391035	0.00456978	0.00472625	0.00611338	0.00479225	0.0133513	0.0121701	0.0117073	0.0106459	0.0130751	0.0192112	0.00856791	0.022129	0.0216664	0.00999754	0.0122154	0.00606672	0.00874665	0.0108106	0.00716561	0.0419125	0.0932074	0.0292838	0.0134993	0.0177823	0.00811444	0.137817	0.0236511	0.0207433	0.0091057	0.0140874	0.00962028	0.0115016	0.00952818	0.0299592	0.0300919	0.011406	0.00968024	0.00931576	0.0091057	0.0148392	0.0457708	0.0118888	0.0125541	0.0102261	0.0122304	0.0121858	0.0146053	0.0138775
0	0.00273311	0.00303535	0.00336759	0.00439939	0.00311393	0.0116303	0.00824965	0.009368	0.00847843	0.0122897	0.0144992	0.00728904	0.0195295	0.0196497	0.00834664	0.0117612	0.00478603	0.00672073	0.0108166	0.00544802	0.040541	0.0998224	0.0184334	0.0116422	0.0198104	0.00695202	0.153805	0.023453	0.0177306	0.00967106	0.0145097	0.0101043	0.011469	0.00935721	0.0334939	0.0361264	0.00926267	0.00869139	0.00823386	0.00967106	0.0159069	0.0549387	0.0153778	0.0132918	0.0107219	0.0132326	0.0132372	0.0154992	0.0157391
0	0.00222492	0.00260068	0.00265827	0.00352643	0.00332229	0.00873045	0.00690959	0.00885628	0.0100572	0.0130901	0.0126385	0.00649602	0.0282416	0.0220255	0.0190807	0.0116289	0.00399946	0.00586575	0.00931775	0.00475419	0.0421689	0.127922	0.0337673	0.0129838	0.0225654	0.00571325	0.153094	0.0313995	0.0162865	0.00548929	0.0198354	0.0066933	0.00697581	0.00792896	0.0387756	0.0445489	0.00764449	0.00757473	0.00661793	0.00548929	0.011446	0.0567808	0.0083598	0.0106898	0.00702118	0.00663625	0.00800257	0.01245	0.0153487
0	0.0052786	0.00563129	0.00538164	0.00605957	0.00705262	0.0123992	0.0109898	0.0123921	0.0140454	0.0140683	0.0154099	0.00874116	0.0285359	0.0231249	0.020664	0.0116077	0.00659761	0.00833281	0.0107815	0.0072656	0.0364362	0.110895	0.0341688	0.0151052	0.0175087	0.0083799	0.122225	0.0307483	0.0169417	0.00824469	0.0171481	0.0105925	0.00962886	0.0107001	0.0326756	0.0340684	0.0102677	0.00996702	0.00922238	0.00824469	0.0137601	0.038846	0.0110436	0.0129992	0.00968278	0.0095713	0.0102673	0.0126434	0.0134211
0	0.00309603	0.00372712	0.00389966	0.00582088	0.00355968	0.0147601	0.0114879	0.0125886	0.0126674	0.0150903	0.0165118	0.00732493	0.0338631	0.0245939	0.0214572	0.0117077	0.00411688	0.00653406	0.00914043	0.00473716	0.0441241	0.131044	0.0460388	0.0139365	0.0189314	0.00543751	0.146782	0.0309265	0.0160408	0.00559632	0.0166499	0.00654175	0.00646766	0.00758885	0.033401	0.0342085	0.00875198	0.0073448	0.00669074	0.00559632	0.0101914	0.0429169	0.00779003	0.00936108	0.00633485	0.00592846	0.00722715	0.0109475	0.0132097
0	0.00328787	0.00409619	0.00393201	0.00518685	0.0046481	0.0120244	0.0115945	0.0108112	0.0114142	0.0133385	0.0173087	0.00764106	0.0338563	0.0220153	0.0208539	0.0113408	0.00520248	0.00819074	0.00961779	0.00604774	0.0462286	0.118714	0.0585194	0.0151521	0.0181015	0.00656407	0.140995	0.0313823	0.0195277	0.00606889	0.016068	0.00758044	0.00728147	0.00844959	0.0313149	0.028438	0.01077	0.00878333	0.00798327	0.00606889	0.0107956	0.036711	0.00859289	0.00992603	0.00737614	0.00701563	0.00808572	0.0108653	0.0114311
0	0.00605308	0.00693727	0.0065204	0.00658348	0.00835235	0.0123192	0.0102053	0.00931625	0.00885649	0.0157573	0.0115287	0.0090358	0.0265522	0.0109707	0.0105449	0.0152748	0.0087003	0.0104537	0.0103807	0.00981539	0.0281553	0.0623823	0.033325	0.0115646	0.0249745	0.0111685	0.0948263	0.0327353	0.0128595	0.0135227	0.0260223	0.0149509	0.0167216	0.0170114	0.0315009	0.0268781	0.0107638	0.0116216	0.0105494	0.0135227	0.0141249	0.0402756	0.0191774	0.0137089	0.0122038	0.0132189	0.011638	0.0149745	0.0148406
0	0.00401071	0.00521085	0.00455592	0.00513848	0.00509889	0.0137444	0.0102715	0.00786227	0.00654889	0.018254	0.0122218	0.0065359	0.0379104	0.0105022	0.00908814	0.0146559	0.00595681	0.00790602	0.00846894	0.00728312	0.0365523	0.0855518	0.0443784	0.00982748	0.0257172	0.00807551	0.128213	0.0404268	0.0108823	0.0134873	0.02565	0.012144	0.0166089	0.0157074	0.0370288	0.0272051	0.00817657	0.00875346	0.00764531	0.0134873	0.0114733	0.0416475	0.0163428	0.0105394	0.00902057	0.0103288	0.00827586	0.0125467	0.0113347
0	0.00354656	0.00372017	0.00346216	0.00403238	0.00365711	0.0112394	0.00929848	0.00732707	0.00519208	0.0180682	0.0138496	0.00592353	0.0390514	0.00988385	0.00896623	0.015799	0.00571131	0.00856401	0.00897241	0.00749009	0.0396539	0.0883454	0.048655	0.0105144	0.0304825	0.0088444	0.1317	0.0405691	0.0125	0.0115509	0.0286819	0.0123236	0.0158809	0.0162046	0.0358308	0.0280475	0.00956242	0.0102708	0.00905291	0.0115509	0.0124664	0.0407588	0.0180009	0.0113059	0.00927587	0.0102445	0.00887507	0.0121545	0.0112903
0	0.00242852	0.00291761	0.00255153	0.00306789	0.00279321	0.00874864	0.0064764	0.00495948	0.00389612	0.014324	0.0102939	0.00491636	0.0337202	0.00816025	0.00764346	0.0140821	0.00488176	0.00770731	0.00809413	0.00639966	0.0390791	0.0897197	0.0497172	0.00902617	0.0285155	0.00736307	0.152302	0.0445049	0.0113105	0.0116355	0.0281289	0.0126229	0.0163826	0.0166051	0.0405153	0.0302682	0.00850848	0.00928208	0.00812356	0.0116355	0.0118855	0.0461886	0.0181818	0.0108646	0.0091293	0.0102767	0.00835853	0.0125834	0.0111169
0	0.00271692	0.00288745	0.00297621	0.00351554	0.00367967	0.0109663	0.00685975	0.00591524	0.00528987	0.00898405	0.00818613	0.00588207	0.0226876	0.00860158	0.00599678	0.00870696	0.00489311	0.00565361	0.00729175	0.00507193	0.0364519	0.0571313	0.014475	0.00833369	0.013659	0.0062898	0.196488	0.0282826	0.00991529	0.050394	0.0116613	0.0112977	0.0370289	0.00907059	0.0362289	0.0171542	0.00790699	0.00777731	0.00711496	0.050394	0.0136821	0.0497172	0.0111853	0.0104322	0.0136301	0.0146945	0.00837297	0.0116927	0.0100936
0	0.00352162	0.00388793	0.00397717	0.00468585	0.00516196	0.0121561	0.00843326	0.00754692	0.00681703	0.0108526	0.0101924	0.00755469	0.0259403	0.0100305	0.00742343	0.010627	0.00610958	0.00750195	0.00933163	0.0068113	0.0393996	0.0577956	0.0152763	0.00967022	0.0156005	0.00775653	0.187425	0.0262342	0.0108009	0.0388572	0.0123459	0.0118987	0.0303002	0.0098719	0.0307978	0.0168534	0.00852417	0.00859297	0.00818216	0.0388572	0.0139127	0.0451492	0.0119911	0.0114986	0.0130612	0.013952	0.00921465	0.011985	0.0106969
0	0.00124743	0.001457	0.00164288	0.00212807	0.00189231	0.00956945	0.00603843	0.00453611	0.00370241	0.00881572	0.00886826	0.00482234	0.0236012	0.00760235	0.00518273	0.00864692	0.00370213	0.00539055	0.00712808	0.00461069	0.0402664	0.0646555	0.0158847	0.00729089	0.0156789	0.00524223	0.228839	0.0273375	0.0109206	0.0441866	0.0118155	0.00965395	0.0373754	0.00874043	0.0361126	0.0185577	0.0075873	0.00731475	0.00669468	0.0441866	0.0136125	0.0566459	0.0104423	0.0095164	0.0115183	0.0137285	0.00658273	0.0106782	0.00887779
0	0.000565782	0.000851826	0.000792336	0.00122335	0.000862165	0.00730506	0.00482008	0.00299117	0.00250559	0.00641065	0.00681904	0.00323075	0.0227841	0.00608567	0.00359067	0.00649692	0.00223393	0.00377847	0.00488189	0.00252666	0.0421615	0.0660653	0.018988	0.00643165	0.0124471	0.00350641	0.250382	0.0296207	0.0120607	0.0596501	0.0101881	0.00819394	0.0400573	0.00665651	0.040381	0.0168534	0.00585372	0.00553798	0.00464877	0.0596501	0.0125047	0.0587961	0.00859879	0.00714998	0.0112371	0.0125936	0.00499824	0.00916107	0.007108
0	0.00200969	0.00294069	0.00252929	0.00355677	0.00256197	0.00991896	0.00620838	0.00592985	0.00519055	0.00964698	0.0103654	0.00605079	0.0185527	0.0122371	0.00835526	0.010037	0.00353002	0.005443	0.00809328	0.004149	0.0447564	0.110954	0.018159	0.00948973	0.0177053	0.00515915	0.256409	0.0302317	0.0117562	0.00934775	0.0121432	0.00749143	0.0128523	0.00738229	0.0317299	0.0254729	0.00594939	0.00587435	0.00527393	0.00934775	0.0133164	0.058995	0.00927401	0.00872109	0.00909938	0.00877812	0.00698262	0.0107755	0.0112388
0	0.00277744	0.004021	0.00349687	0.00467101	0.00370573	0.0126006	0.00831291	0.00819318	0.00697284	0.0119264	0.0127036	0.00738373	0.0223137	0.0143305	0.00980897	0.0113984	0.00447741	0.00658368	0.00919646	0.0051004	0.0476389	0.111957	0.0192671	0.0102903	0.0170327	0.00593258	0.244386	0.0291369	0.0113926	0.00865366	0.0114843	0.00755296	0.0121025	0.00745784	0.0292327	0.0223062	0.00624827	0.00608911	0.00560222	0.00865366	0.012421	0.0495065	0.00885736	0.00848028	0.00884687	0.00851155	0.00697106	0.0101902	0.0102172
0	0.00120274	0.00217727	0.00150041	0.00255914	0.00140679	0.00787177	0.0100267	0.00565044	0.00476337	0.0072124	0.0154079	0.00441327	0.0205514	0.0111736	0.00749232	0.00653291	0.00278888	0.00600438	0.00622918	0.00407511	0.0477437	0.0853779	0.042903	0.011088	0.0108495	0.00487147	0.241481	0.0324088	0.0296761	0.00708429	0.010891	0.00621872	0.0106851	0.00805039	0.0384854	0.0243273	0.0105445	0.00846102	0.00760736	0.00708429	0.0124253	0.0670513	0.00840492	0.00928028	0.00800375	0.00714897	0.00653406	0.012127	0.0102031
0	0.00140307	0.00217237	0.00180601	0.00296036	0.00131058	0.00937628	0.00783588	0.00594929	0.00439487	0.00946164	0.0127644	0.00451344	0.0180923	0.0100451	0.0062293	0.0079904	0.00232251	0.00484335	0.00570284	0.00335321	0.0424596	0.0881729	0.0283644	0.00887683	0.015178	0.00423532	0.248536	0.0297388	0.0179609	0.00713225	0.013574	0.00525834	0.00988793	0.00685227	0.039621	0.029904	0.00843635	0.00631183	0.00555192	0.00713225	0.0123094	0.0832427	0.0100144	0.00919425	0.00739126	0.00720126	0.00598113	0.0128652	0.0130252
0	0.00926061	0.0086548	0.00888847	0.00822697	0.0103247	0.0181408	0.0125385	0.0110281	0.00985381	0.0196323	0.0139593	0.0105931	0.0145791	0.0112622	0.0118819	0.0197228	0.0105376	0.0104373	0.0113024	0.0105302	0.0248108	0.025219	0.018216	0.0118009	0.0261829	0.0114261	0.090921	0.023759	0.0114453	0.0544202	0.0276805	0.0173037	0.0300394	0.01308	0.0225981	0.0117116	0.0105952	0.0115789	0.0107237	0.0544202	0.0155875	0.0245985	0.0150496	0.0131944	0.0171355	0.0144947	0.0116366	0.012935	0.0120849
0	0.00798366	0.00856414	0.00834553	0.00809336	0.0106013	0.0177055	0.0127019	0.0118991	0.0107336	0.019416	0.0139325	0.0109658	0.015111	0.0119677	0.0120791	0.0193577	0.0113451	0.0110521	0.0117761	0.0111114	0.022317	0.022876	0.0167291	0.0118012	0.0256173	0.0124865	0.0705504	0.0208465	0.0123804	0.0524131	0.0265559	0.0183419	0.0281115	0.0135583	0.0212221	0.0127262	0.0113975	0.0121559	0.011625	0.0524131	0.0170573	0.0245399	0.0161573	0.0143718	0.0185892	0.0162289	0.0132748	0.0142948	0.0137884
0	0.00292088	0.00471741	0.00370733	0.00384615	0.0032222	0.0173123	0.015378	0.00669023	0.00518099	0.0205452	0.021902	0.00518927	0.0203556	0.00900514	0.00852934	0.0189185	0.00625806	0.010149	0.00655823	0.00655203	0.0391515	0.0306054	0.0257153	0.0089459	0.0269275	0.00711418	0.142445	0.0284823	0.0151714	0.0714422	0.0283792	0.0144178	0.0351963	0.0112163	0.0290126	0.0086031	0.00731302	0.00936784	0.00791122	0.0714422	0.0198481	0.0283506	0.0132966	0.00871138	0.0151302	0.0102295	0.00690131	0.009164	0.00663444
0	0.00727646	0.00657079	0.00658844	0.0064801	0.00649422	0.0166666	0.0133498	0.00877067	0.00672539	0.0183172	0.0168272	0.00712834	0.0120824	0.0089847	0.0084107	0.018627	0.00839763	0.0104966	0.00865819	0.00893703	0.0265851	0.0247656	0.0193374	0.00902907	0.0266898	0.00948709	0.114806	0.0263937	0.0138911	0.057583	0.0304278	0.0181917	0.0303231	0.0140478	0.0269723	0.0113212	0.0106877	0.0121782	0.0109586	0.057583	0.0205784	0.031267	0.0156234	0.0132514	0.0178536	0.0135067	0.010618	0.0123826	0.00989092
0	0.00326764	0.00376052	0.00373042	0.00484895	0.00416627	0.0102752	0.0078929	0.00925574	0.00665428	0.010594	0.0125734	0.00694813	0.0183636	0.0195669	0.0118557	0.0127677	0.00482205	0.00740605	0.0110518	0.00563751	0.0447752	0.146153	0.0258257	0.0120894	0.0234009	0.00653444	0.192399	0.0301307	0.0149765	0.00674857	0.0133554	0.00827256	0.00818828	0.00840554	0.0284047	0.0357793	0.00765964	0.00760228	0.00705304	0.00674857	0.0115092	0.0396304	0.0103056	0.0101485	0.00748155	0.00765402	0.00775162	0.0103594	0.0154399
0	0.00339894	0.00358647	0.00353353	0.00434581	0.00415455	0.00932167	0.00726117	0.00823783	0.00631908	0.00967463	0.0115418	0.00660563	0.0149596	0.0165876	0.010494	0.0110444	0.00510081	0.00725762	0.0102276	0.00554245	0.0392485	0.133305	0.0230657	0.0116007	0.0220804	0.00670027	0.188306	0.0287246	0.0155092	0.00764706	0.0137468	0.00971136	0.00907919	0.00923502	0.0296299	0.0390355	0.00869704	0.00865607	0.00781532	0.00764706	0.0129248	0.043507	0.0118128	0.0113742	0.00879149	0.00891608	0.00948295	0.012009	0.0171949
0	0.000843009	0.00126808	0.00121619	0.00229964	0.00107618	0.0068155	0.00628109	0.00574088	0.00356782	0.00756415	0.0124821	0.00376024	0.0159678	0.0141495	0.00771105	0.00781364	0.00207188	0.00545646	0.00705306	0.00331096	0.0466079	0.129146	0.0433207	0.0100438	0.0193384	0.00408411	0.221915	0.0342691	0.0204164	0.00411812	0.0141765	0.0039718	0.00551964	0.00626984	0.0432543	0.0535011	0.0113365	0.00631886	0.00585648	0.00411812	0.00945228	0.0675092	0.00806091	0.00843877	0.00377176	0.00412089	0.00434317	0.0114465	0.0206636
0	0.00135111	0.00188811	0.00186687	0.00340028	0.00133563	0.00835046	0.00837371	0.00720819	0.00428646	0.00708836	0.013532	0.00401989	0.0150489	0.0151454	0.0078955	0.00699726	0.00228528	0.00500332	0.00663849	0.0029739	0.0421459	0.1239	0.0451105	0.0106773	0.012958	0.00373399	0.213916	0.0340453	0.0231766	0.00432459	0.0125921	0.00472302	0.00564153	0.00663818	0.0440851	0.0492729	0.0131135	0.00805026	0.00807304	0.00432459	0.00960075	0.0624585	0.00673885	0.00895879	0.00440114	0.0046873	0.00523019	0.0121475	0.0188164
0	0.00287204	0.00477433	0.00350244	0.00314634	0.00384928	0.0116168	0.00560512	0.00500151	0.00461622	0.0146143	0.00752076	0.00553137	0.0135663	0.00713896	0.00767609	0.015022	0.00546878	0.00558156	0.0072627	0.0049879	0.0241634	0.0464078	0.0192665	0.00845933	0.0246996	0.0066507	0.169721	0.0295789	0.00909253	0.0539052	0.0195005	0.0146521	0.0428698	0.0112851	0.027707	0.0129518	0.00837894	0.0084929	0.00739835	0.0539052	0.0233428	0.0380281	0.0111128	0.0106366	0.0257273	0.0163977	0.0119202	0.0108813	0.00915297
0	0.00270459	0.00528747	0.0037496	0.00325675	0.00360931	0.0145546	0.00600928	0.00544055	0.00481587	0.0174574	0.00772263	0.00547697	0.0145947	0.00779686	0.00810294	0.0163263	0.00541448	0.00528043	0.00729204	0.004627	0.0246833	0.0525564	0.0195077	0.00848984	0.0251206	0.00618712	0.169415	0.0291374	0.00887421	0.0545943	0.0195614	0.0137107	0.0468776	0.0107032	0.0264313	0.0124543	0.00784254	0.00798267	0.00675592	0.0545943	0.0221751	0.0352523	0.0101077	0.0097611	0.0248307	0.0163989	0.0114079	0.0103141	0.00855767
0	0.00177949	0.00415139	0.00236597	0.00182415	0.00201962	0.016494	0.0061586	0.00456399	0.00346751	0.0227263	0.0102363	0.00522233	0.016844	0.00707952	0.00737548	0.0176683	0.00411025	0.00548564	0.00723964	0.00417714	0.0292414	0.060465	0.0232784	0.0075723	0.028191	0.00547658	0.201447	0.0308574	0.0097802	0.0442333	0.0246685	0.0112581	0.0419344	0.0107875	0.0313763	0.0135908	0.00647658	0.00766851	0.00616965	0.0442333	0.018712	0.0464301	0.00902225	0.0079429	0.0197965	0.0129373	0.01019	0.00915988	0.00624271
0	0.00150308	0.00287084	0.00171426	0.00134422	0.00142497	0.0102368	0.00430331	0.00298709	0.00244489	0.0133431	0.00680826	0.00341156	0.0119314	0.0050421	0.005315	0.0122687	0.00304129	0.00402056	0.00526776	0.00302542	0.0226433	0.0465139	0.0192274	0.00616818	0.0219088	0.00441339	0.185243	0.029761	0.00946704	0.0632626	0.0226237	0.0123886	0.0511902	0.0114759	0.0354161	0.0145039	0.0066469	0.00776409	0.00615039	0.0632626	0.02146	0.0545604	0.00967825	0.00879385	0.024849	0.0165256	0.0120797	0.0106154	0.00714956
0	0.00592188	0.00701209	0.00681248	0.00662639	0.00783173	0.0172988	0.0100619	0.010497	0.00855977	0.0151493	0.0132413	0.00915856	0.013247	0.0124248	0.0101898	0.0169288	0.00850111	0.00954436	0.0103346	0.00912394	0.0227565	0.0526951	0.0165853	0.0118322	0.0285352	0.0108571	0.0922536	0.0276984	0.0140504	0.0136776	0.0327524	0.0152431	0.0153503	0.0189196	0.0327005	0.0239378	0.0128313	0.0108999	0.0102842	0.0136776	0.0292462	0.0390717	0.0150631	0.0155753	0.0196949	0.0137602	0.0144338	0.0169321	0.0158547
0	0.00297716	0.0041379	0.00362647	0.00346625	0.00370198	0.0154576	0.00669051	0.00676146	0.00465408	0.0146943	0.0121917	0.00543507	0.0119871	0.00978783	0.00700192	0.0182774	0.00483961	0.0064821	0.00779115	0.00544399	0.0284011	0.0703671	0.0179437	0.00902478	0.0384334	0.00737387	0.153229	0.0354335	0.0115282	0.00930707	0.0460877	0.0114221	0.0131331	0.021321	0.0430998	0.0253067	0.0105469	0.00766798	0.00667696	0.00930707	0.0340376	0.0524418	0.0124422	0.0121141	0.017942	0.00968996	0.0112651	0.0150132	0.0121371
0	0.00273749	0.00451599	0.00366006	0.00389435	0.00364137	0.0160055	0.0118851	0.00781825	0.00570922	0.0144181	0.0193068	0.00659977	0.015536	0.0126576	0.00799121	0.017898	0.00558638	0.0110308	0.00940516	0.00760374	0.0338654	0.0695598	0.0365512	0.0119459	0.0317408	0.00847312	0.140636	0.0350443	0.0200179	0.0100509	0.0339993	0.0116274	0.0135984	0.0196204	0.0364043	0.0215849	0.0145009	0.0130563	0.0109777	0.0100509	0.028206	0.0398554	0.013297	0.0130613	0.0152763	0.00907248	0.0106189	0.0123614	0.0101595
0	0.00106399	0.00225164	0.00180928	0.00185428	0.00198244	0.0120249	0.00657629	0.00545654	0.00349886	0.014078	0.015213	0.00498517	0.0130344	0.0105621	0.00676747	0.0209512	0.00429344	0.00867244	0.00825096	0.00580771	0.0346272	0.0861494	0.0293591	0.00990341	0.0421749	0.00700451	0.168231	0.0359049	0.0143967	0.00876911	0.0441071	0.00999662	0.0125864	0.019457	0.0392914	0.0246542	0.0115048	0.00926159	0.0075683	0.00876911	0.029095	0.0457507	0.0113537	0.0109888	0.0153643	0.0079697	0.00942545	0.0125737	0.0103253
0	0.00149464	0.002627	0.0018318	0.00263438	0.00182722	0.0125006	0.00680433	0.00563853	0.00478085	0.0159299	0.0112506	0.00523721	0.0267545	0.0103907	0.0188688	0.0129974	0.00343785	0.00569785	0.00743707	0.00435542	0.0466707	0.100605	0.0477847	0.00972962	0.0246076	0.00485739	0.200431	0.0415723	0.00981744	0.0134702	0.0215598	0.00737525	0.0181384	0.0136066	0.0384755	0.0219624	0.00647341	0.00537679	0.00462535	0.0134702	0.0100879	0.0548131	0.0101813	0.00951191	0.00691082	0.00808461	0.0067867	0.0103855	0.0077483
0	0.00220219	0.00353537	0.0025591	0.0034081	0.00278959	0.0132726	0.00774233	0.00636767	0.00541717	0.0156942	0.011779	0.00590311	0.0261093	0.0101396	0.0177048	0.0121208	0.00415017	0.00605873	0.00743711	0.00489607	0.0435265	0.0894191	0.0453466	0.0097323	0.0215128	0.00556445	0.193386	0.0400285	0.00971734	0.0151215	0.0200948	0.00813753	0.0185885	0.0137496	0.0381918	0.0208226	0.00685995	0.00585539	0.00517396	0.0151215	0.0108549	0.0531416	0.0113181	0.0102465	0.00814971	0.00903807	0.00767219	0.0112739	0.00845849
0	0.000750051	0.00160379	0.00100041	0.00148613	0.00103703	0.00810913	0.00482831	0.00367888	0.00288968	0.0121511	0.00918456	0.00409104	0.0208392	0.00775323	0.0137274	0.0107588	0.00276204	0.00537361	0.00652559	0.00371312	0.0415355	0.0886683	0.0460116	0.00877851	0.0243478	0.0043999	0.223083	0.0408602	0.011199	0.0146876	0.0223859	0.0077122	0.0180627	0.0147871	0.04089	0.0239062	0.00740236	0.00639423	0.00518785	0.0146876	0.0112368	0.0656783	0.0117792	0.0104217	0.00742078	0.0086073	0.00721114	0.0116845	0.00866167
0	0.00103416	0.00208304	0.00126486	0.00204071	0.00122856	0.0100793	0.00687044	0.00441169	0.00360994	0.0137867	0.0118329	0.0044451	0.0234293	0.00861932	0.0148578	0.0111894	0.00310025	0.00640477	0.00667771	0.00420165	0.0427843	0.0867678	0.0522675	0.00985049	0.0232647	0.00481748	0.209684	0.0396155	0.0146269	0.013784	0.0213516	0.00766776	0.0174698	0.0139573	0.0387417	0.0225956	0.00889276	0.00735531	0.00607099	0.013784	0.0112239	0.0599614	0.0114696	0.0104178	0.00736692	0.00855595	0.00712951	0.0111061	0.00818903
0	0.00178367	0.00306048	0.00235309	0.00338108	0.00247437	0.00997514	0.00741841	0.00529814	0.00440704	0.00837272	0.0100119	0.00536229	0.0194108	0.00850728	0.00331413	0.00849824	0.00388407	0.00457815	0.00674968	0.00405078	0.043471	0.0552374	0.00920434	0.00546758	0.0115045	0.00527164	0.298804	0.0221111	0.00733738	0.0663078	0.0100382	0.00958096	0.0272881	0.00719182	0.0212406	0.0104247	0.00656795	0.00590416	0.00541102	0.0663078	0.0103536	0.0436183	0.0086963	0.00749008	0.00886538	0.00929448	0.00556979	0.0073969	0.00639389
0	0.00175541	0.00277756	0.00211957	0.00313419	0.00250714	0.0102204	0.00719304	0.00551689	0.00471467	0.00850718	0.00927944	0.00552755	0.0194099	0.00847798	0.0035559	0.00890199	0.00410215	0.00471871	0.00695899	0.004231	0.0435324	0.054073	0.00916652	0.00539898	0.0126304	0.00564284	0.312651	0.0205284	0.00770099	0.0655215	0.010544	0.00976736	0.0253989	0.00717803	0.0187698	0.0100572	0.00656959	0.00599809	0.00570063	0.0655215	0.0105474	0.0408653	0.00931555	0.00743117	0.00825435	0.00876517	0.00549121	0.00689035	0.00629014
0	0.000772025	0.00161288	0.00106866	0.0018429	0.00103479	0.007909	0.00549936	0.00363317	0.0027024	0.00660064	0.00820768	0.00391075	0.0139772	0.00586833	0.00178738	0.00602849	0.00218147	0.00306688	0.00467795	0.00240177	0.0350325	0.0456547	0.00711652	0.0035822	0.00937263	0.00338964	0.31327	0.0188091	0.00666755	0.0826798	0.0100367	0.00758623	0.0274348	0.00584145	0.0248203	0.0117334	0.004395	0.00469971	0.00414227	0.0826798	0.00898254	0.0647996	0.00723071	0.00602918	0.0079874	0.00884827	0.00405948	0.00705409	0.00572348
0	0.000599291	0.00166855	0.000899135	0.00184524	0.000873622	0.0081641	0.00768815	0.00369924	0.00273048	0.00653672	0.0110425	0.0037751	0.018319	0.006262	0.00189179	0.00571953	0.00225003	0.00355449	0.00459174	0.00281373	0.04364	0.0467309	0.0117724	0.00417915	0.00849951	0.0036	0.314769	0.0214115	0.0121947	0.0842939	0.00896418	0.00741648	0.0260335	0.00571822	0.0256156	0.00970657	0.00473852	0.004794	0.00423304	0.0842939	0.00998213	0.0551503	0.00671702	0.00541068	0.00719526	0.0068808	0.00337211	0.00597793	0.00418829
0	0.00331898	0.0054781	0.00387639	0.00504813	0.00391388	0.0179142	0.0126242	0.00747118	0.00786886	0.0150764	0.0138174	0.00586343	0.0327895	0.011975	0.00995764	0.0124358	0.00737863	0.0061891	0.00700666	0.00636913	0.0429989	0.0401601	0.0220155	0.00833142	0.0158099	0.00927564	0.127235	0.0248895	0.00918316	0.0693622	0.0146315	0.0128303	0.0505781	0.0104013	0.0257897	0.0121397	0.00817726	0.00743156	0.00713142	0.0693622	0.0160303	0.0265133	0.011188	0.0105577	0.0176356	0.0166803	0.00873134	0.0112622	0.0104588
0	0.00190993	0.00321994	0.00217709	0.00312898	0.00206444	0.0121318	0.00839699	0.00471521	0.00510835	0.0109013	0.00983379	0.00387561	0.0261053	0.00859393	0.007257	0.00946617	0.00520357	0.00397307	0.00483732	0.00411165	0.0395375	0.0363924	0.0202604	0.00626464	0.0139218	0.00582863	0.139258	0.0259741	0.0071445	0.0921312	0.0137731	0.0123057	0.0608575	0.00952289	0.029478	0.011555	0.00679618	0.0060866	0.00549605	0.0921312	0.0162066	0.0321231	0.00975139	0.00926795	0.0196263	0.0184558	0.0079539	0.0118002	0.0107301
0	0.00136374	0.0027985	0.00156715	0.00235973	0.0011789	0.0101332	0.00691128	0.00377495	0.00350124	0.00961699	0.00849183	0.00305912	0.0214322	0.00632825	0.00528594	0.00809115	0.00351066	0.00317709	0.00391993	0.00284414	0.0354868	0.0347647	0.0178391	0.00513389	0.0132932	0.00414814	0.154529	0.0236011	0.0070068	0.0991381	0.0130771	0.0116681	0.0609275	0.00885012	0.0303664	0.0127406	0.00557686	0.0053422	0.00470011	0.0991381	0.0170854	0.0394931	0.00962649	0.00818886	0.0200694	0.0211019	0.00713121	0.0118286	0.0108393
0	0.00215622	0.00431722	0.00234005	0.00371162	0.00191716	0.0154326	0.0127691	0.00575055	0.00597046	0.0127222	0.0137219	0.00427814	0.0303806	0.00985789	0.00865751	0.0100591	0.00542407	0.00552882	0.00532699	0.00470737	0.0425987	0.0393623	0.0275063	0.00820557	0.0144714	0.00644579	0.140478	0.0274596	0.012698	0.0742522	0.0140759	0.0128836	0.0531474	0.0105809	0.0303899	0.0126323	0.00799463	0.00802889	0.00781435	0.0742522	0.019536	0.0303438	0.0110562	0.0100066	0.017603	0.0168062	0.00827816	0.0110742	0.0096718
0	0.00183173	0.00274116	0.00242396	0.00294128	0.00235357	0.0150311	0.00760275	0.0057898	0.00441348	0.0125068	0.0105168	0.00472966	0.0233033	0.00829684	0.010557	0.0112988	0.00453599	0.00453058	0.00603626	0.00476045	0.0456783	0.0481278	0.0244263	0.00797833	0.0171587	0.00563232	0.178162	0.0285883	0.00814281	0.0750217	0.0163914	0.0114854	0.0482325	0.00874215	0.0279709	0.0106772	0.00595175	0.00586796	0.00528752	0.0750217	0.0128392	0.0373425	0.0152908	0.00722455	0.0165212	0.0119243	0.00611751	0.00799084	0.00669006
0	0.00238184	0.00330121	0.00280742	0.00333232	0.00321156	0.01445	0.00762329	0.00617449	0.00494049	0.0122384	0.0104419	0.00530118	0.0225279	0.00850489	0.011001	0.0116342	0.00514284	0.00520692	0.00636124	0.00520223	0.0427409	0.0443044	0.0236146	0.00846145	0.0165583	0.00620834	0.166905	0.0275608	0.00812878	0.0754859	0.0160339	0.012345	0.0476821	0.00897704	0.0270316	0.0108984	0.00639966	0.00644575	0.00569644	0.0754859	0.0132774	0.0371682	0.0155964	0.00782834	0.0175225	0.0124697	0.00656131	0.00842894	0.00720387
0	0.000712333	0.00157311	0.00115841	0.00161284	0.000949149	0.0112426	0.0066989	0.00406661	0.00272309	0.0101065	0.0101947	0.00341349	0.0203236	0.00671011	0.00827738	0.00952608	0.00309065	0.00418448	0.00463286	0.0036492	0.0453835	0.0481516	0.0263427	0.00729722	0.0163231	0.00438062	0.202339	0.029008	0.0110777	0.0796202	0.0158897	0.0110294	0.0479951	0.00812236	0.0305388	0.0105699	0.00533561	0.00612075	0.00504702	0.0796202	0.0145694	0.0442634	0.0141727	0.00639237	0.0160719	0.0112784	0.00473633	0.00727283	0.00543132
0	0.000749846	0.00152982	0.0012116	0.00168988	0.00102168	0.0107572	0.00627248	0.00405834	0.00278316	0.00992135	0.00949277	0.00344607	0.0187261	0.00668278	0.00829969	0.00946351	0.00309264	0.0039571	0.00469035	0.003507	0.0429644	0.0487692	0.0250992	0.00731731	0.0164762	0.00443512	0.197535	0.0284486	0.0104635	0.079888	0.0161038	0.0110384	0.0490867	0.00823827	0.0310781	0.0111563	0.00546815	0.00604558	0.00504902	0.079888	0.0144526	0.0459682	0.0141859	0.00654017	0.0166001	0.0119593	0.00500154	0.00769069	0.00575607
0	0.00249538	0.00302162	0.00283012	0.00368384	0.00379171	0.00985138	0.0089003	0.0070023	0.0076404	0.0113511	0.0117527	0.00668051	0.0379076	0.0125157	0.00837004	0.0102991	0.00594841	0.00665208	0.00875984	0.00671641	0.0537763	0.0821626	0.0209706	0.00865032	0.0164315	0.00756777	0.167155	0.0266008	0.0103547	0.0320007	0.0144521	0.0101455	0.0472837	0.0095715	0.0307457	0.0208703	0.00792313	0.00734105	0.00705629	0.0320007	0.0124612	0.0448443	0.0130235	0.00971459	0.0104494	0.014908	0.00728775	0.0103551	0.00882763
0	0.00171279	0.0027834	0.00202938	0.00377033	0.0023391	0.0106376	0.00901115	0.00578935	0.00635717	0.00922687	0.0105668	0.00478697	0.0351604	0.0109178	0.00627209	0.00807619	0.00382588	0.00451399	0.00647808	0.00436912	0.0520844	0.0889297	0.0188312	0.00636527	0.0125079	0.0046014	0.1795	0.0276514	0.00778492	0.0388427	0.0126885	0.00840573	0.0540685	0.00782499	0.0351572	0.021884	0.00638459	0.00549931	0.00511189	0.0388427	0.0117879	0.0530735	0.0104034	0.00833064	0.0105294	0.0164828	0.00626305	0.0104437	0.00826194
0	0.00128259	0.00264414	0.00160659	0.00383215	0.00153612	0.011664	0.0112448	0.00566209	0.00609406	0.00907897	0.0120825	0.00438195	0.0369978	0.0109674	0.00596251	0.00721166	0.00310539	0.0044263	0.00551255	0.00355123	0.0524706	0.0872622	0.0292614	0.00728582	0.0111837	0.00367665	0.178845	0.0265608	0.012157	0.0371483	0.0117338	0.00733236	0.0526806	0.00775051	0.0342235	0.021008	0.00722121	0.00594727	0.00536122	0.0371483	0.0120114	0.0507273	0.0101425	0.00742448	0.00906373	0.0155971	0.00513058	0.0101165	0.00798738
0	0.00165153	0.00259351	0.0019793	0.00353897	0.00221449	0.00998495	0.00945263	0.00566708	0.0060382	0.00906533	0.0109927	0.00482865	0.0331839	0.0107625	0.00647196	0.00789534	0.00395522	0.00499135	0.00661196	0.0047235	0.0502259	0.0836625	0.0253974	0.00785089	0.0121992	0.00481554	0.173867	0.02686	0.0120269	0.0363416	0.0122582	0.00886843	0.0502586	0.00874054	0.0337616	0.0215664	0.00783588	0.00674879	0.00611097	0.0363416	0.013182	0.0488812	0.0119252	0.00864161	0.0102841	0.0162163	0.00630916	0.011132	0.00892513
0	0.0018373	0.00291261	0.00278461	0.00309979	0.00267356	0.0159323	0.00815128	0.00685535	0.0048663	0.0140268	0.0144765	0.00562766	0.0176575	0.012882	0.00981625	0.013947	0.00367434	0.00642663	0.00913044	0.00434255	0.0454235	0.0853677	0.0203249	0.00916085	0.023453	0.00592905	0.20338	0.0351385	0.0112386	0.00608053	0.0235305	0.00661024	0.00976511	0.00955972	0.0415264	0.0219664	0.0064017	0.00594637	0.0054472	0.00608053	0.0117048	0.0685018	0.00819258	0.0116993	0.00606428	0.00793682	0.00674509	0.0161952	0.0105414
0	0.00373981	0.0053554	0.00502682	0.00530671	0.00541625	0.0216563	0.0116021	0.0102563	0.00790531	0.018364	0.0171583	0.00836157	0.020778	0.015913	0.011875	0.0167035	0.00587307	0.00931446	0.0116249	0.00669545	0.0454214	0.0830647	0.0211933	0.0108683	0.0248168	0.00847594	0.18346	0.0315818	0.0117478	0.00742828	0.0239875	0.00866447	0.0110688	0.0106166	0.0333446	0.0187295	0.00780819	0.00754195	0.00721103	0.00742828	0.0123347	0.0472545	0.00912877	0.0112307	0.00779392	0.00887537	0.00809027	0.0127977	0.00961972
0	0.0017954	0.00387625	0.00299959	0.0033392	0.00205065	0.0210556	0.0148469	0.00765343	0.00509712	0.0158083	0.0214274	0.00539799	0.0204768	0.0136932	0.00852099	0.0140043	0.00340216	0.00956348	0.00874808	0.00433044	0.050178	0.0830283	0.0415019	0.0108888	0.0237471	0.00599994	0.217186	0.0349562	0.0230982	0.00493633	0.0220008	0.00527649	0.00928286	0.00913807	0.0358125	0.0162932	0.00841055	0.00808362	0.00704133	0.00493633	0.00970459	0.0548016	0.00666205	0.00909676	0.00500917	0.00568072	0.0049038	0.0113757	0.00681549
0	0.00166942	0.00255859	0.00220172	0.00256772	0.00198388	0.0118878	0.00767182	0.00558192	0.00378986	0.0104076	0.012227	0.00459282	0.0141855	0.00947573	0.00698953	0.0114464	0.00329496	0.00645016	0.00792193	0.00379862	0.0407921	0.0711757	0.0261795	0.00943023	0.0229119	0.00574857	0.218798	0.0359158	0.0157689	0.00658711	0.0241312	0.00679076	0.0104346	0.0104926	0.0445206	0.0218316	0.00867101	0.0079834	0.00744499	0.00658711	0.0124552	0.0767144	0.00828093	0.0125171	0.00652151	0.0080563	0.00691167	0.0167773	0.0103093
0	0.00374939	0.00422348	0.00414992	0.00447061	0.00510926	0.00992466	0.00798056	0.00781862	0.00668605	0.0112117	0.011843	0.00654639	0.0177389	0.0116767	0.00818582	0.0107251	0.00575399	0.00765851	0.00883323	0.00660035	0.0336478	0.0662572	0.0207508	0.010927	0.0178401	0.00746699	0.148292	0.0388705	0.0138408	0.00939595	0.0213045	0.011498	0.0112038	0.0125287	0.0421292	0.026668	0.0127163	0.0105757	0.0102087	0.00939595	0.0144329	0.057291	0.0140138	0.0204161	0.0109301	0.0121436	0.0119883	0.0209329	0.0165481
0	0.00372802	0.00423245	0.00394393	0.00436117	0.00451953	0.0120124	0.00897291	0.00852101	0.00716308	0.0145575	0.0150329	0.00662962	0.0248582	0.0143088	0.00928853	0.0131399	0.00503206	0.0077728	0.00918196	0.00589436	0.0438882	0.0827123	0.0256306	0.0113715	0.0207063	0.00668755	0.160456	0.0425388	0.0133418	0.00794329	0.0215609	0.00928963	0.00979016	0.0109913	0.0425164	0.0251108	0.0111042	0.00903948	0.00862361	0.00794329	0.0122373	0.0523335	0.0114191	0.0175558	0.00842925	0.00965269	0.00940089	0.0176321	0.0133782
0	0.00318297	0.00403613	0.00397136	0.00424422	0.00391597	0.0126438	0.0106816	0.00890019	0.00734212	0.0152255	0.0183878	0.00701068	0.0266562	0.0155919	0.00951157	0.0136643	0.00532872	0.00845416	0.00908103	0.00615977	0.0447549	0.0871775	0.0321635	0.0125467	0.0190472	0.00675138	0.16592	0.03933	0.0155175	0.00809087	0.0194393	0.00962095	0.00902024	0.0108859	0.0360468	0.0230149	0.0127645	0.010629	0.0105379	0.00809087	0.0116558	0.0470081	0.0109697	0.0166791	0.0084531	0.00889283	0.00890812	0.0158703	0.0127198
0	0.00189826	0.00274999	0.00236944	0.00304171	0.00247128	0.0104106	0.0090699	0.00670965	0.00574064	0.0132703	0.0164648	0.00533708	0.025556	0.013052	0.00779945	0.0112611	0.00363851	0.00776212	0.00789239	0.00480087	0.0472024	0.0838548	0.0350063	0.0110049	0.019388	0.00555634	0.183965	0.0427046	0.0165665	0.00688437	0.0196792	0.00769882	0.00867473	0.0103945	0.0421247	0.025001	0.0128361	0.0097849	0.00902683	0.00688437	0.0115247	0.0566947	0.0113664	0.0172163	0.00723796	0.00832951	0.00831885	0.0172881	0.012289
0	0.00360868	0.00512199	0.00411933	0.00443968	0.00468145	0.0164261	0.0111753	0.0091623	0.00725559	0.0204869	0.0183982	0.00734458	0.0206623	0.0131114	0.0135671	0.0160676	0.00502416	0.00729883	0.00945065	0.00596711	0.0384349	0.0980642	0.0307563	0.00995259	0.0249814	0.00626258	0.213183	0.0348332	0.0100215	0.0110009	0.0242382	0.0079526	0.0134547	0.00826655	0.0312373	0.0247924	0.00631804	0.00709256	0.00619082	0.0110009	0.010688	0.0489225	0.00957637	0.0085219	0.00727314	0.00774031	0.00613474	0.00809111	0.0092473
0	0.00349871	0.00497161	0.00397177	0.00423317	0.00459241	0.0143583	0.00998475	0.00819315	0.00643209	0.0182049	0.0168422	0.00699159	0.0202102	0.0114799	0.0129745	0.0144254	0.00509742	0.00689851	0.00873797	0.00607925	0.0379875	0.0836063	0.0319836	0.0102503	0.0232873	0.00661933	0.202961	0.0381799	0.0104313	0.0130553	0.0225721	0.00893629	0.0153453	0.00894134	0.0344723	0.0257014	0.00709904	0.00738827	0.00672295	0.0130553	0.0120957	0.0551499	0.0112367	0.00997285	0.00871118	0.00890706	0.00683293	0.00945515	0.0100928
0	0.0012075	0.0017311	0.00173372	0.00296296	0.00167685	0.00914111	0.00641538	0.00801995	0.00521652	0.00985262	0.0124618	0.00585426	0.0242973	0.0173745	0.0120681	0.00858305	0.00241589	0.00484947	0.0086967	0.00406253	0.0501258	0.1591	0.0303614	0.012633	0.0154823	0.00388115	0.19557	0.0381532	0.0184458	0.00362005	0.0124053	0.00443901	0.0056042	0.00694471	0.0620025	0.0474057	0.00512632	0.00484894	0.00445732	0.00362005	0.011423	0.0469355	0.00737158	0.00797444	0.00445258	0.00475732	0.00481992	0.0121739	0.0140755
0	0.00140134	0.00177163	0.00173027	0.00271786	0.00189045	0.00776971	0.00558157	0.00658205	0.00453377	0.00845851	0.0103729	0.0049074	0.0204089	0.0143177	0.00963096	0.00819317	0.00248103	0.00433671	0.00771191	0.00369497	0.0454	0.145434	0.0276091	0.0107488	0.0165556	0.00365039	0.197175	0.0378278	0.0169919	0.00555743	0.0130334	0.00488343	0.00715018	0.00710049	0.0657688	0.0477407	0.00523523	0.00473087	0.00435809	0.00555743	0.0120889	0.0533551	0.00787888	0.00831907	0.00531145	0.00575912	0.00549692	0.0140035	0.0160084
0	0.00105809	0.00171654	0.00154106	0.00325878	0.00105154	0.0102297	0.00823696	0.00787562	0.00470355	0.00990829	0.0134629	0.00479823	0.0251569	0.0146618	0.00942874	0.00739085	0.00172908	0.00436552	0.00617076	0.00321109	0.0474123	0.143109	0.0454268	0.0117611	0.0146402	0.00333594	0.210186	0.036529	0.0211022	0.00333928	0.0125927	0.00338478	0.00467195	0.00642878	0.060805	0.0433348	0.00951378	0.00694964	0.00604499	0.00333928	0.0107509	0.0505975	0.00764021	0.00780122	0.00382664	0.0041082	0.00410218	0.012185	0.0143235
0	0.000894881	0.00117654	0.00126344	0.00216542	0.00102168	0.00771879	0.00515265	0.00611176	0.00359151	0.00887138	0.010429	0.00452934	0.0205575	0.0134484	0.00881217	0.0079566	0.001877	0.00383311	0.00695172	0.00304699	0.0451896	0.147365	0.0339304	0.0106219	0.0173886	0.0033184	0.20877	0.0364157	0.0185789	0.00357472	0.0138814	0.00376931	0.00478961	0.00669477	0.0654294	0.0515526	0.00709513	0.00551636	0.00493077	0.00357472	0.0113624	0.0573137	0.00794194	0.00812524	0.00414343	0.00448695	0.00464684	0.0135701	0.0171694
0	0.00231909	0.00374179	0.00263668	0.00408132	0.00284802	0.0140625	0.00824843	0.00618025	0.00723891	0.0138873	0.00932338	0.00573536	0.0273989	0.0124483	0.0133537	0.0119466	0.00541455	0.00510691	0.00674892	0.00463623	0.0466303	0.0334593	0.0282053	0.00768732	0.0172939	0.00615175	0.138464	0.0288754	0.00740047	0.0801923	0.0157995	0.0142833	0.0469906	0.00878078	0.0262315	0.00927608	0.00676293	0.00677551	0.00600153	0.0801923	0.0137202	0.031763	0.0107234	0.0089367	0.0180191	0.0119371	0.00754438	0.0102284	0.00859027
0	0.00199566	0.0029957	0.00227016	0.0034298	0.00248493	0.0102745	0.00649212	0.00501761	0.00567546	0.010454	0.0073561	0.00473915	0.0217159	0.00995433	0.0107043	0.00937154	0.00468455	0.00454711	0.00578942	0.00435241	0.0400345	0.0292986	0.0244045	0.00732243	0.0157267	0.00611361	0.136507	0.0282491	0.00824838	0.0826082	0.0162591	0.0159053	0.0468121	0.00934805	0.0290671	0.010347	0.00743394	0.00776106	0.00700199	0.0826082	0.0158903	0.0389885	0.0123682	0.0099023	0.0203688	0.0137696	0.00861592	0.0122954	0.00938804
0	0.000981748	0.00213477	0.00130012	0.00255971	0.00121888	0.0111897	0.00710651	0.00449197	0.00520546	0.0125597	0.00939656	0.00429134	0.0271841	0.0107278	0.0114274	0.0111843	0.00382147	0.00445508	0.0058318	0.00377108	0.0538863	0.0380177	0.0312651	0.00711088	0.0181819	0.0047638	0.183217	0.0314	0.00758523	0.075219	0.015646	0.0120902	0.0432416	0.00757107	0.0299035	0.00882298	0.00524885	0.0057236	0.00484709	0.075219	0.0133734	0.0392612	0.00902212	0.00705347	0.0161061	0.010505	0.00572107	0.00900956	0.00652656
0	0.00110129	0.00251843	0.00144223	0.00284943	0.00116739	0.0124315	0.00799477	0.00487754	0.00574861	0.0119494	0.00964948	0.00417585	0.0282472	0.0112247	0.0115694	0.0100095	0.00376835	0.00420861	0.00522994	0.00324718	0.0509226	0.0362321	0.0306507	0.00695177	0.0157954	0.00464836	0.169809	0.0308739	0.00880237	0.0821385	0.0142508	0.0127119	0.0455874	0.00793739	0.0292574	0.00869015	0.00551113	0.00608628	0.00528558	0.0821385	0.0142199	0.0382684	0.00948188	0.0071803	0.016628	0.0104662	0.00589555	0.00894757	0.00668261
0	0.00155398	0.00231998	0.0027208	0.00451906	0.00278722	0.0158529	0.00907629	0.0139359	0.0102945	0.0153025	0.0196036	0.00793543	0.0208136	0.0351244	0.00609795	0.0138255	0.00302278	0.0056591	0.0113334	0.00432261	0.0609497	0.158242	0.0109142	0.0100413	0.0213524	0.00419575	0.218288	0.0234357	0.0157785	0.00395471	0.0165575	0.00414512	0.00575412	0.00450012	0.0275474	0.0363016	0.00447937	0.00486844	0.00442508	0.00395471	0.00630416	0.0597472	0.00589826	0.00674116	0.00384892	0.00439847	0.00355543	0.00817349	0.0102996
0	0.00342497	0.00396164	0.00450251	0.00563064	0.00666305	0.0121804	0.0102231	0.0156613	0.0132471	0.0147214	0.0209533	0.0104891	0.0182625	0.0424789	0.00983426	0.0123697	0.0061599	0.00827371	0.0137443	0.00767312	0.0511818	0.164648	0.0137735	0.0135185	0.0180221	0.00732071	0.145423	0.0191888	0.0191875	0.00659031	0.0153135	0.00802818	0.00739965	0.00706387	0.0231477	0.0379402	0.00819832	0.00790443	0.00762472	0.00659031	0.00878368	0.039111	0.00897532	0.00940892	0.00682129	0.00687372	0.00690475	0.0102273	0.0128716
0	0.00374133	0.00415275	0.00488714	0.00649535	0.00668274	0.0119246	0.0114236	0.0133842	0.0104322	0.010264	0.0161513	0.00893365	0.0148351	0.0269388	0.00894218	0.0104549	0.00678522	0.00885206	0.0113542	0.00821439	0.0413935	0.114166	0.0341243	0.0150125	0.0155922	0.00857815	0.129914	0.02139	0.0237022	0.00859774	0.0165902	0.0101472	0.00895077	0.00885208	0.0262839	0.0369525	0.0152982	0.0112338	0.0117496	0.00859774	0.0109504	0.044984	0.0113636	0.0124066	0.00879536	0.0086564	0.00901865	0.0143378	0.0181924
0	0.00335253	0.0036707	0.00469052	0.00688152	0.00608626	0.0130842	0.011938	0.0154525	0.0111136	0.0121023	0.0200549	0.00941843	0.0164763	0.0328005	0.00901626	0.0118261	0.00606105	0.00807898	0.0119619	0.0075606	0.0473008	0.138458	0.028702	0.0142843	0.0184647	0.00771528	0.141453	0.0204934	0.0216743	0.00767219	0.0154685	0.00873454	0.00804297	0.00761578	0.0249841	0.038035	0.012292	0.00946238	0.00966573	0.00767219	0.00947242	0.0426828	0.00989588	0.0103371	0.00729048	0.00718949	0.00719745	0.0123011	0.0162049
0	0.00349829	0.00530401	0.0038925	0.0051013	0.00363053	0.014288	0.0123724	0.00940469	0.00913691	0.0161261	0.0186118	0.00707448	0.0419949	0.0169907	0.00686271	0.0113392	0.00472467	0.00709165	0.00837867	0.0051971	0.062767	0.090026	0.0249072	0.00882195	0.0175322	0.00654489	0.203534	0.0280513	0.0115019	0.0100548	0.0149916	0.00700105	0.0122788	0.00736636	0.0379087	0.024123	0.00609072	0.00629858	0.0058165	0.0100548	0.0105144	0.0467658	0.00805735	0.00775874	0.00786659	0.00922137	0.00571633	0.0094797	0.00932038
0	0.00211307	0.00335802	0.00240066	0.00317198	0.00193235	0.0101428	0.00886219	0.00629438	0.00607171	0.0118803	0.0144968	0.00484747	0.0339604	0.0135912	0.00478762	0.00932305	0.00298699	0.00517081	0.00651903	0.00340228	0.0620103	0.0900816	0.024509	0.00721399	0.0168194	0.0048174	0.223491	0.0323064	0.0110421	0.0115105	0.0156313	0.00529654	0.0138312	0.00600664	0.0501373	0.0283829	0.00462818	0.00497441	0.00428387	0.0115105	0.0105942	0.0639767	0.00650397	0.006932	0.0077924	0.0100065	0.00420791	0.0102475	0.00994477
0	0.00180979	0.00333421	0.00215694	0.00296838	0.00170084	0.00992941	0.010099	0.00623458	0.005955	0.0122668	0.0164282	0.0049318	0.0349952	0.0136803	0.00548862	0.00930319	0.00307528	0.00640146	0.00679952	0.00383341	0.0612583	0.0866914	0.0343039	0.00881402	0.017446	0.00530321	0.223824	0.0298608	0.016258	0.01033	0.0153849	0.00704289	0.0124869	0.00720219	0.0422623	0.0261358	0.00772672	0.00715332	0.00646143	0.01033	0.011057	0.0544793	0.00794302	0.00784641	0.0081145	0.00924779	0.00497494	0.00963966	0.00989875
0	0.0016714	0.00284185	0.00208738	0.0030255	0.00206157	0.00866413	0.0106274	0.00656439	0.00633644	0.0113581	0.0169964	0.00523737	0.0352233	0.0146346	0.00632989	0.00864695	0.00369811	0.00670043	0.00659877	0.00418614	0.0649996	0.0917076	0.0400738	0.00987805	0.0136656	0.00595376	0.233244	0.0327671	0.0169904	0.00934714	0.0124982	0.00605049	0.0118183	0.00699275	0.0441478	0.0241832	0.00822968	0.00662179	0.00622797	0.00934714	0.0102319	0.0492397	0.00653003	0.00711148	0.0071973	0.00831475	0.00444345	0.00930802	0.00805224
0	0.00125349	0.00197785	0.00155343	0.00212496	0.00166332	0.0107598	0.00465327	0.00395254	0.00374429	0.0070996	0.0069433	0.0045299	0.019644	0.00691817	0.00500427	0.0073236	0.00357314	0.00386478	0.00617614	0.00358383	0.0356938	0.0428396	0.0110202	0.00604521	0.0157339	0.00533137	0.192733	0.0238422	0.00742233	0.0983575	0.0126934	0.0137122	0.0565428	0.0112012	0.0293922	0.0113841	0.00592516	0.00561314	0.00482108	0.0983575	0.0138526	0.0435771	0.0138664	0.00714064	0.0161813	0.0135699	0.00539071	0.00850276	0.00616585
0	0.00164241	0.00239691	0.00195191	0.00268752	0.00215644	0.0127913	0.00534557	0.00481405	0.00469304	0.00924259	0.00779995	0.0055431	0.0214755	0.00838332	0.00611614	0.00937299	0.00410114	0.00461949	0.007394	0.00410646	0.0357855	0.0469356	0.0115348	0.00699534	0.0188586	0.00596018	0.182551	0.022675	0.00847657	0.0845895	0.0147857	0.0147712	0.0526597	0.0114687	0.0277824	0.0127492	0.0065398	0.00692498	0.00599457	0.0845895	0.0146917	0.0415879	0.0146383	0.0083086	0.0158459	0.013872	0.00658478	0.00934649	0.0072979
0	0.000875811	0.00190132	0.0011708	0.00210289	0.000954352	0.0143106	0.00681086	0.0041766	0.00375393	0.00805678	0.00876085	0.00439269	0.0225841	0.00691138	0.00451719	0.00648458	0.00270285	0.00373133	0.00541845	0.00275997	0.0375205	0.0435555	0.015259	0.00587745	0.013375	0.00383732	0.216683	0.0230538	0.0111603	0.0945385	0.0108248	0.012139	0.0502485	0.0102561	0.0298356	0.0106735	0.00518619	0.00554163	0.00453268	0.0945385	0.0155395	0.0445483	0.0133435	0.005895	0.0143276	0.0117394	0.00440525	0.00709443	0.00489597
0	0.000687407	0.00178696	0.00115009	0.0019865	0.0010541	0.0113278	0.00736216	0.0038988	0.00347203	0.00667376	0.00911187	0.00420219	0.0211974	0.00682223	0.00497412	0.00627818	0.002948	0.00432982	0.00584008	0.00367427	0.0379966	0.0425996	0.0181827	0.00723795	0.0135526	0.00479338	0.209796	0.0255654	0.0164412	0.0853591	0.0118656	0.0137499	0.0482889	0.0115921	0.0331886	0.0113646	0.00693302	0.00778747	0.00632826	0.0853591	0.019267	0.0442745	0.0142002	0.00745388	0.0145407	0.0113921	0.00514371	0.00796103	0.00512648
0	0.00239984	0.00402551	0.00277506	0.0036308	0.00266498	0.0138408	0.00750978	0.0064597	0.00706844	0.0162455	0.0115486	0.00522391	0.0228894	0.0133962	0.0125013	0.0113937	0.00503628	0.00491033	0.00662497	0.00535503	0.0392102	0.0820747	0.026228	0.00903424	0.016777	0.00576509	0.147852	0.0260621	0.0081784	0.0457569	0.0135408	0.0105041	0.0706681	0.00876885	0.0271263	0.0189601	0.00565081	0.00542274	0.00486671	0.0457569	0.0133235	0.0342132	0.0141088	0.00687603	0.0170895	0.0205884	0.00648116	0.00869781	0.00899552
0	0.00300913	0.00511703	0.00327277	0.00418835	0.00299214	0.0165258	0.00883495	0.00717158	0.00782745	0.0181067	0.012575	0.00555804	0.0270642	0.0136209	0.0139171	0.0118688	0.00520724	0.00511334	0.00669723	0.00540998	0.042212	0.0815616	0.0303124	0.009095	0.0166926	0.0058953	0.15089	0.028023	0.00777112	0.0454106	0.0130508	0.00999764	0.0699174	0.00873596	0.0272802	0.0167843	0.00529904	0.00504077	0.00453407	0.0454106	0.0126465	0.0312412	0.0134247	0.00642501	0.016496	0.0184585	0.00590363	0.00772446	0.00775619
0	0.00233885	0.0036426	0.00269073	0.00324564	0.00321802	0.00887088	0.00765255	0.00553572	0.00562528	0.0110944	0.0118287	0.00477983	0.020871	0.00968319	0.0100731	0.00857253	0.00516931	0.00577118	0.00593307	0.00575322	0.0367243	0.0571773	0.0358098	0.00941316	0.0141268	0.00581897	0.148909	0.0288275	0.0129304	0.0474985	0.0126655	0.0130379	0.0630674	0.011218	0.0327425	0.0171057	0.00846853	0.00832806	0.00717636	0.0474985	0.017766	0.0374739	0.0172886	0.00933516	0.0196857	0.0201976	0.0084174	0.0108777	0.00943346
0	0.00435559	0.00505307	0.00364242	0.00430773	0.00351599	0.0118694	0.00768556	0.00629021	0.00628724	0.0128858	0.0101617	0.00506195	0.0165494	0.00998691	0.00946242	0.00929568	0.00494959	0.00528051	0.00610059	0.00524901	0.0280774	0.0604206	0.0257917	0.0088226	0.0146196	0.00616275	0.120293	0.0240448	0.0112189	0.0451003	0.0145091	0.0138559	0.0671394	0.0115416	0.0296679	0.0221593	0.00885191	0.00895103	0.0080393	0.0451003	0.0174279	0.0400569	0.0180745	0.0100848	0.0207317	0.0264379	0.00965776	0.0121188	0.0127039
[truncated: 10 more columns]

## Sheet: Table S5
Table S5. Analyte areas of whole N-glycan dataset.
Y	H3N2	H3N2F1	H4N2	H3N3	H4N2F1	H5N2	H3N3F1	H4N3	H3N4	H6N2	H4N3F1	H5N3	H3N4F1	H4N4	H3N5	H7N2	H4N3S1	H5N3F1	H6N3	H3N4S1	H4N4F1	H5N4	H3N5F1	H4N5	H8N2	H5N3S1	H5N4F1	H4N5F1	H5N5	H5N4S1F1	H9N2	H4N5S1F1	H5N4S1	H4N5F2	H5N5F1	H6N5	H4N6F1	H10N2	H5N6	H5N4S1F1_1	H5N5S1	H6N5F1	H3N6S1F1	H5N6F1	H5N5S1F1	H6N5S1	H5N6F2	H6N6F1	H7N6
1	3163.36	4885.69	3670.85	3771.86	4772.23	8013.16	6065.16	6113.9	5187.2	10538.7	8248.52	6297.69	12570.8	6472.37	5385.3	9507.26	5616.49	6316.85	7245.35	6192.68	19627.6	29209.7	9644.53	6997.5	12319.6	6490.03	139449	22217	7672.78	34621.1	12301.4	10566.9	17158.9	9442.14	16592.1	9514.07	7674.12	7643.67	7042.52	34621.1	10074.2	32665.2	10170.4	11056.4	9394.28	9474.31	8115.31	10016.1	8062.49
1	2682.01	3283.92	2969.17	3009.11	3950	4904.76	4395.52	4288.15	4036.27	5586.37	4894.99	4287.15	5996.44	4356.75	3990.75	5379.1	4115.31	4372.39	4650.71	4277.66	8149.61	11098.2	5395.67	4539.36	6207.25	4406.92	43196.4	9125.58	4781.42	13192.4	6308.53	6332.24	7708.51	5275.61	7527.84	5430.79	4752.17	4770.73	4585.7	13192.4	6133.57	13132.3	6201.7	6453.39	5913.03	5815.52	5490.85	6161.15	5385.12
1	1011.7	2374.8	1685.59	1415.96	1734.23	4777.69	3575.58	3469.13	2098.77	8220.9	7046.89	3681.03	10059.9	3951.23	2568.57	7225.11	2792.55	3838.69	4934.19	3653.79	18302.1	31018.2	8245.87	4120.55	10518.4	3425.8	156743	19772.7	5531.63	30572.7	10033.8	6359.61	14393.1	6159.73	13629.5	7100.64	4474.13	4790.95	4168.05	30572.7	6718.17	32427.8	6082.27	7248.66	5295.01	5633.24	4454.34	6590.42	4219.35
1	2029.29	5595.33	2722.39	2742.44	3021.56	10516.3	8007.44	6709.11	4092.05	16173.3	14261.7	6766.47	20249.9	7301.92	4562.57	12918.1	4963.73	6884.64	8098.04	5953.66	35384.6	58591.3	18204.6	7917.5	16864.9	5880.31	299703	39455.8	12919.3	80142	17612.6	12995.1	32014.9	11524	27298.2	12880.3	8676.32	8737.28	7355.34	80142	13448.5	59710.8	12025.9	14230	10836.9	11436.4	8074.92	11862.9	8185.78
1	5171.1	14595.6	7797.23	6086.69	6317.38	34071.9	12907.9	9564.63	7085.72	35981.5	18049	8291.25	37197	12323.2	8249.26	32468.3	11548.2	9852.91	10736.5	10536.7	40059.5	84167.6	29659.3	11773.9	32813.6	9726.19	142786	46510.5	12469.4	45376.9	21130.1	19376.3	88496.6	23095.1	46190.8	14865.2	13085	11334	10179.2	45376.9	24548.6	37404.6	18719.9	19454.6	19853.3	20240.7	15320.9	23223.7	11594.9
1	6565.7	21391.6	10666	8118.56	7792.91	50190.5	19401.3	13325.7	9677.08	61383	30580.9	12448.7	71547.5	21449.8	13559	59759.7	18696.8	16072.8	18438.7	18776.8	84579.2	174069	61991.5	22240.3	69326.7	17830.6	326971	102423	25113.2	109883	46697.2	44116.1	209227	54021.2	116640	31476	28710.4	24076.1	21318.8	109883	56357.4	93958.7	43032.4	43182.2	44405.4	44389.3	32505.3	54725.2	22317.9
1	5688.25	18332.5	7915.28	6231.16	5162.15	63526.7	27781.8	13708.4	8117.68	85296.9	48626.9	11769.2	91586.8	23595.6	13321.9	72645.4	19613	21373.6	18659.9	19580.1	104377	211934	86386.6	23077	78424.4	16210.3	382317	121579	29988.5	117552	61524.1	39402	245480	70865.6	160013	36583.3	30742.9	24663.6	21770.8	117552	53379.1	128714	39570.6	49421.1	41869.1	42542.6	36956.9	72059.6	21605.1
1	6868.36	23212.4	9069.15	6363.02	5007	71640.2	28813	13989.5	7652.31	84218.6	46523.6	11285.1	89648.6	21326	11875.8	69324.6	18418.5	18716	17237.2	17752.3	107613	237149	84980.8	22416.6	77293.1	13712.9	452615	140484	30009.1	159517	62430.2	42753.5	307180	76585.1	196137	40288.3	31205.3	23612.4	20446.7	159517	60044.9	153604	40049.5	54073.1	51621.6	50747.8	40441.4	84233.3	22873.8
1	8064.86	10884.9	8984.04	10391.3	9667.91	35081.1	23056.6	21450.8	16501.1	36720	41425.4	16813.3	46764.6	34985	12691.7	36691.6	11551.6	16118.8	22467.2	13327.1	115637	222786	26031.8	20043.9	52551.6	15483.7	534974	67089.2	25733.2	14749.8	38594	15713.8	22697	17044.3	70088.8	53035.2	15088.1	15182	13714.6	14749.8	23952.4	169103	21114.1	23089	15922.8	19148.2	14914	28369.9	24624.8
1	10065.1	16738.2	12172.7	15880.9	11034.6	46086	37611.2	41402	22340.5	63407.7	74727.4	24276.7	65930.6	80066.6	20249	66031.8	14597.2	23657	38223.8	17660.1	172517	585237	47217.1	33449.4	94163.4	22773.6	747277	74944.9	54263.5	17577.3	66988.9	20291.6	31217.1	21459.8	126872	145951	25313.7	23903.1	21232.3	17577.3	34533.5	249557	31410.6	34128.7	17975.8	27273.2	21512.7	51783.7	53764.3
1	7547.2	10659.5	8166.13	10306.9	7321.29	27243.2	22616.7	23750	12518.9	36014	42422.2	14251.1	32349.9	40055	11619.8	36752.5	9246.37	15731.3	20751.6	9951.66	83888.7	299011	48183.5	20154	54434.2	12578.8	397134	38334.8	35347.4	11340.3	37147.1	12581.1	17589.1	13098.7	64773.6	81809.7	19503.3	15915.3	14461.2	11340.3	20443.9	143786	18093.5	20787	11486.8	16889.2	13247.9	31847.8	35454.7
1	6333.6	9030.86	7004.34	8722.98	6337.7	23701.5	19585.8	20690.8	11022.4	32727.1	37645.9	12811	29534.8	35956.2	11031.2	33254.2	8765.5	14217.1	18479.1	9268.13	77322.8	274075	47098.7	18915.5	48414.6	11963.4	372540	37012.4	33745.7	11010.8	36627.9	11910.7	16760.1	12509.5	60824.9	75434.5	18801.9	15179.3	13772.3	11010.8	18918.2	127717	17864.9	19132.9	10667.3	15183	12011.4	28197.2	31624.9
1	5590.87	11371.6	7498.85	6895.31	7041.48	34575.8	19715.6	12779.4	10120.8	31398.4	25451.2	11074.8	39748.5	17515.9	13792.8	27705.6	11602	10980.4	12804.2	10805.2	65759.6	75673.4	25385.2	13138.7	30148.5	11840.2	242042	38366.5	14338	106393	26373.1	18482.3	75326.5	15090.4	42409.4	18867.3	12961.7	12105.6	11652.9	106393	24166	54124.2	16278.1	14980	23548.9	21369.1	11877.8	16667.7	13184.4
1	6875.95	13860.6	8376.42	8115.54	8346.4	48360.4	25721.6	16459.4	12588.4	48464.6	35986.3	14442.6	60415.9	24486.6	17631.5	42951	14948.6	13986.6	17565.5	13200.2	106711	120170	36925	16888.8	48387.8	15062.5	430484	62564.7	19030.8	202350	41182	27673.2	132333	20843.8	72267	26680	17391.2	16414.2	14852.2	202350	36042.8	98899.5	22808.3	21140.3	39743.3	32746.7	16152	24968.8	18846.2
1	3993.35	9941.18	6289.72	5116.43	5473.15	26766.8	23551.5	11528	8781.39	27065	34037.3	13610.5	42337.3	19802.9	14733.6	29445.6	13057.8	18414	19509.4	15230.2	102542	112539	62925.8	27599.9	44358.3	16834.9	552996	92892	72536	345080	55356.2	61236.8	174470	47299.3	145748	54347.1	42763.4	43704.1	40690.7	345080	107586	203226	54819.6	51951.8	83305.3	71167.4	41415.1	62795.4	41840.6
1	372.804	1061.86	577.871	525.44	481.754	3350.02	2939.44	1070.52	870.148	3934.49	4511.97	1084.1	7021.13	2150.71	1498.84	4070.37	1265.49	2064.24	1578.86	1256.32	15785.3	13513.7	7241.24	2061.03	5415.58	1362.98	79880.5	10827.7	5147.32	46646.7	5723.43	5122.17	20666.9	3522.68	15240.5	4099.43	2546.58	2898.1	2451.64	46646.7	9885.15	22661.8	4335.71	3409.23	8086.67	5398.63	2605.05	4709.07	2395.04
1	17682.2	12748.6	10956.2	12505.5	7320.64	57127.5	17292.4	20905.9	24586.3	47852.3	25250.5	14040.7	26625.8	31350.2	47350.9	47505.2	13324.5	11278.7	17863.2	10264	50146.2	107562	21398.7	65691	69509.7	12657	233625	29029.4	81784.4	70840.9	53693.9	17937.4	82641.1	17488.3	31498.2	33114.6	12663.6	30112.4	35191.4	70840.9	35324.7	61403.1	16607.6	15828	18242.7	25800.9	15199.7	16479.8	22329.4
1	23926.2	16474.3	13488.6	15903.4	7819.92	77597.9	20513.3	25811.7	30552.4	65607	31714.4	17844.3	35325.3	39969.1	60366.6	66298.9	16607.5	13306.9	22684.3	11454.3	67445.5	148075	28190.4	83220	103961	15739.9	348098	39473.2	108154	112655	76430.4	24043.9	127322	24198.2	45613.6	46295.9	15358.5	39512.9	46808	112655	49528	94752.9	23145.7	19744.9	25418.6	38608.4	20099.2	23004.5	32443
1	14945.5	10169.8	9551.92	8528.34	5949.3	38456.8	18239.9	14871.2	15902.8	31377	22537.4	10813.2	17774.7	21099.7	27331.9	31350.8	10802.4	13420.9	14342.7	9009.87	34895.2	72019.4	27151.7	42289.6	49956	11768.3	171792	26041.7	67114.3	63355.7	42231.1	21864.4	64581.9	18850.1	33155.5	32130.4	16881.6	27701.3	30967	63355.7	37066.7	59762.4	25178.6	19301	21779.6	27199.8	17530.3	20359.1	24594.8
1	14186.1	10278.5	9675.73	9103.01	5618.09	41920.8	19352.8	14986.1	19256.7	38046.5	26103.3	12291	24499.2	25539.5	36846.3	40699.9	11583.6	14877.3	17958.1	10264.6	47692.8	88407.8	32523.9	52463.3	67642.8	14012.2	225468	30265	73910.1	64950	50516.8	20690	72272.3	18985.7	35496.4	33160.2	15615.5	28628.4	32815.6	64950	36685.8	66708.5	24447	18086.2	20039.7	26680.1	16187	18990.7	23539.8
1	12825	16992.7	15652.1	19248.1	10905.6	52772.4	31395.2	47348.5	27132.7	55944.5	63871	23242.8	45551.1	85179.1	24454	53735.7	11935.9	19567	33165.6	13978.8	120004	356398	40490	39168.7	72148.2	15919.4	392382	71083	66419.5	13736.5	58436.3	16725.1	17193.6	17824.8	126733	102478	20629.4	21452.9	20590.4	13736.5	25475.7	146672	23851.5	35832.4	14764.7	16909.2	18507.1	56407.5	39091.8
1	17307.1	26218	23770.5	32115.8	15865.1	98667.5	65867	91376.2	49720.4	119662	147749	47991.3	98717.1	185209	50694.7	123662	22746.6	48709.3	70869.7	25546	289050	862920	164060	93914.8	170505	32591	986927	172404	177427	31485.2	143683	34857.8	37838	39787.8	318339	271937	65550.6	57963.2	58392.7	31485.2	58169.3	392904	50037.2	85907.6	31046.3	34486.6	42329.5	177080	124062
1	26119.6	37097	33979.4	44180	24764.4	131164	86995.6	119912	67244.1	158458	190908	66179.5	129162	238897	69683.8	163369	34304.9	66754.7	96089.9	38136.7	368759	1.09575e+06	205330	124197	228957	48608.2	1.26352e+06	225237	229258	47043.8	189327	52846.1	54948.1	57694.2	411098	350517	87441.1	79483.4	79438.2	47043.8	82464.5	508360	74108.9	117743	47213.5	51420.5	61085.7	232381	163622
1	6499.71	11467.5	8137.66	10251.8	8674.25	46688.5	27659.7	21223.7	16625.2	37888.6	48843.4	16265.7	57172.7	35675.8	11139.8	37837.9	9940.4	15914.8	21539.2	11732.6	140078	236233	25513	19962.2	47912.8	15365.1	698585	78519.2	24545.7	13060.2	37441.3	14685.5	22610.1	16635.8	79305.9	49150.7	13667.7	13537.1	12392.2	13060.2	24556.1	183531	17717.5	22549.5	15763	18658.2	14560.9	27470.5	22163.3
1	6781.57	12066.1	8863.85	11276.2	8797.6	55100.4	32300.5	26356.8	21049.4	57271.9	67326.8	22469.1	84907.1	49980.2	13924.2	60349.2	12874.2	21495	32145.3	15621.5	225027	361662	39297	27843.8	91767.1	19625.4	1.07138e+06	127634	35578.4	17395.7	63511.9	18251.8	32832	22662.8	125162	79988.6	18161.2	18423.2	16251.8	17395.7	34143.9	329393	30684.1	33427.3	20537.9	26019.8	18754	43033	33841.9
1	8568.03	13860.5	10690.5	11870.8	9793.66	46356	37438.1	23248	18413.1	39651.7	60110.7	18845.7	63315	38050.3	14012.2	38315.1	12638.5	23447.8	24516.2	14968.5	152525	232772	66431.6	28766.6	50195.9	18592.5	777253	89946.6	57804	17288.1	42762.5	20396.9	27752.7	23135.5	82140.4	51888.9	23469.2	21503.5	20485.9	17288.1	30167.6	193100	27508.8	29731.1	22145	22952.2	19592.6	33205.5	26470.7
1	6034.27	9371.77	8106.17	8244.11	8480.99	31412.4	21191.8	16049.5	12759.3	31407.1	37433.3	14141.1	41633.5	24549.6	10310.3	31411.5	10845.1	15700.3	18124.1	12439.1	95560.3	136823	33033.4	17932.4	44539.9	14962.1	506537	58310.4	26543.4	12557.8	35080.3	14572.6	19175.4	15952.8	53661.8	35735.3	15459.1	14286.1	12938.7	12557.8	22911.3	135788	25826.3	21079.2	14650.5	16585	13794.7	22543.1	18592.5
1	2799.62	3447.67	3047.68	3111.74	3968.47	6191.9	4986.96	4725.19	4292.1	7093.88	6682.98	4580.42	8660.1	5515.89	4592.67	6468.74	4316.89	4974.25	5443.65	4689.04	15244.6	22781.4	7098.37	5424.06	7797.81	4860.46	117336	12772.2	6718.83	5539.63	7807.12	6629.3	6460.95	6842.27	19205.7	10542.2	5785.44	5382.82	5275.17	5539.63	8403.77	38881.8	8417.2	8131.11	6456.42	7002.98	6781.37	10070.4	7723.14
1	2796.82	3460.09	3081.33	3154.17	3919.79	6300.33	5139.48	4739.76	4407.61	7459.4	6687.49	4907.5	9028.68	5548.06	4510.94	6657.5	4174.9	4944.36	5383.57	4703.28	15937.9	23297	7166.16	5405.4	7977.68	4796.39	121087	12833.6	6456.38	5066.51	7796.46	6244.62	6259.28	6548.27	19084.4	10127.7	5687.39	5118.48	4962.26	5066.51	8263.22	36194.3	7966.02	7841.54	5990.61	6608.04	6390.46	9525.84	7343.08
1	1653.9	2974.27	2266.9	2282.92	2526.26	9106.22	7238.8	5246.27	4066.82	14459.8	16596	6039.44	19836.6	8309.73	5059.26	12422.7	3894.44	7089.43	8053.06	6083.37	47254.6	72399.6	18386.8	7774.83	17706.9	5653.89	429735	32734.4	15064.3	5774.47	16092.2	7777.08	9652.21	12239.4	52996.9	24736.4	9674.5	7502.15	6716.96	5774.47	15731.2	123808	14899.2	13341.7	7281.71	9698.83	8892.94	20496.2	12345.7
1	14431	16462.7	15337	15878.6	16854.9	43320.8	36298.7	44495.1	26228.8	61843.4	74619	27829.2	59713.1	83122.6	22824.1	61796.6	16920.4	25777.6	40561.9	20540.2	144565	496932	42455.7	37639.6	80290.3	20732.6	664638	73078.8	56348.6	19903.6	51334.4	24539.2	25026.7	23009.3	101301	132099	23850.3	23693.1	22017.9	19903.6	33969.1	170971	31360.6	31154.6	22054.1	23430.5	22423.9	36491	40920.5
1	4806	5371.41	5214.84	5464.64	6290.5	11344.7	10279	12304.4	8389.26	17252.8	19254.8	9024.33	15618.3	19353.6	7980.94	18000.9	7572.65	8519.41	11593.4	7851.24	33708.3	107712	13347.5	12143.4	24197.6	9277.5	157452	20597.2	17376.2	8172.76	16871.5	9991.94	9567.34	8857.74	27388.6	38306.5	9270.02	9422.5	8808.54	8172.76	12725.3	50763.4	14996.7	12087.5	8926.54	9754.24	9003.36	13516.8	14526.3
1	12013.8	17528.5	13924.9	18077.5	12257.6	52021	38269	48470	24520.9	72148.5	83438.5	28463.6	63165.6	92271.8	22772.3	77504.7	16690.7	29207.3	46988.3	19371.6	176705	659729	81883.5	47187.3	116222	23725	963364	97498.1	88373.8	28477.4	74506.2	29701.9	31132.6	29084.2	145543	220284	38194.2	33694.3	30305.8	28477.4	45777.3	289947	45996.3	41793.3	26756.5	30347.3	27216.8	61659.4	76859.8
1	8015.47	9756.36	8632.62	10260.7	9323.22	21966.8	18904.6	20917.9	13197.2	28921.3	35996.8	15190.4	28691.7	36749.5	13995	32139.5	12114.5	16695	22965.7	13452.5	71869.3	230375	38790.4	23619.1	52602.2	16659.9	371582	44515.4	39370.6	17860.4	34085	19915.6	18201.5	18111	61092.2	82597.3	21073.7	19467.6	18122.4	17860.4	26099.5	115815	30751	24892.4	17564.1	19260.8	18503.4	31139.1	35052.4
1	12041.1	21581.5	13743.5	19540.9	11282.9	52883.8	37565.3	49954.5	37713.6	66247.9	76246.8	24642.2	93178.9	100069	33819.7	64274.9	14062	21178.8	37292.6	15820.4	146176	527767	69217	50485.7	85238.3	19456	500664	107105	73527.6	29469.7	74536.7	22739.4	32127.7	26430.3	132839	205305	45375	32413.8	30521.4	29469.7	35130	206241	28316	63838.8	21314.9	28322.9	30991.6	71767.2	90647.1
1	14883.5	28073.9	16753.1	24828.4	12364.1	64205	49452.1	63623	48143.1	81544.4	102529	29641.8	126800	129494	42341.5	80096.3	15645.6	25511.1	47277	18021.1	199932	676466	100258	65930.9	109091	21771.7	667282	157261	96164.8	21250	97910.6	24333.2	31576	33070.9	193056	273607	63505.1	38365.7	37269.5	21250	44777.4	277758	31329.7	89372	23570.4	34458.7	39585.1	96741.1	112428
1	4773.67	6844.95	6162.23	6857.66	5954.86	16790.8	13431.6	15804.4	12797.4	25147.2	26853.7	11097.9	30707.2	30498.4	13815.2	27190.2	9209.99	11497.1	15437.7	9733.56	50385.2	155524	36509.3	20882.1	39235	12420.4	156086	36785.5	28330.2	16340.4	31884.8	12899	21064.2	12884.2	42785.8	63739.4	21022.5	15522.6	14669.3	16340.4	17487.7	66273.7	18614.7	24848.2	13478.8	16575.9	14175.8	26074.8	32430.5
1	2878.91	4018.45	3648.05	3960.14	4022.78	7681.54	7494.33	8281.86	6768.02	10583.5	13835.8	6225.53	14747.1	14685.8	7297.59	11831.7	4900.35	6758.98	7757.28	5439.74	24362.7	70782.4	22714.2	11230.7	18571.1	6845.9	74453.3	20351.4	16406.5	6503.9	14842.3	7298.07	7377.58	7483.88	24700.9	34476.6	13876.4	9677.3	9187.75	6503.9	10243.1	39399.5	9796.53	16169.8	7439.67	9012.86	9151.68	17263.7	19784.8
1	12728.4	23269.2	16483.4	22088.2	13631.2	108332	60969.9	55721.7	42326.3	115787	113841	42332.6	177949	114299	74766.2	102177	19852.7	34883.6	56676.6	23154	366030	846605	190132	77002.2	166925	28589.1	1.51454e+06	245362	96514.5	28041.1	127640	35673.4	51217.6	50772.6	321053	206221	36483.7	31374.8	28203.6	28041.1	83556.9	405506	40923.8	55265.7	47830.3	34918.1	56952.7	67657.1	67732.3
1	1456.51	2287.21	1627.25	1833.74	1740.76	6031.75	5532.7	3649.18	3122.22	6735.72	8888.33	3275.22	11805.9	7067.46	5606.23	7043.63	2741.62	4638.17	4661.05	3556.46	27488	50592.4	25016.7	7973.18	14444.7	4418.24	153411	24702.8	14108.9	4016.29	12605.1	5488.67	6361.72	6956.69	31937.8	18091.7	7369.71	5990.22	5260.98	4016.29	11321.9	43725	8690.31	7887.73	6303.63	4930.03	7326.68	8842.93	7874.26
1	4907.34	7183.99	4644.93	6064.62	4867.27	23475.1	19413	13324.2	10469.5	23668.9	30938.8	9544.89	41939.5	23891.9	16315	18808.3	6259.43	11218.5	12034.9	6927.32	76250.7	150454	64796.6	19174.7	27232.1	8684.35	316324	53162	31383.1	8635.25	23778.2	11641.2	13263.4	13848.1	63939.2	36539.8	14714.5	11732.7	10796.2	8635.25	20169.7	77319.3	13216.9	15329	13745.5	10226	14660.8	16200.9	15095
1	3597.61	5036.17	4028.32	4257.93	5201.74	10087.1	8755.41	7113.28	6203.04	12465.2	14901	6743.38	21405.8	9950.18	6355.18	13075.1	6861.18	8519.82	8871.88	6957.19	40674.1	63589.9	12767	8634.09	17294.7	8067.14	249248	22211.6	11369.8	10929.1	15776.5	11058.5	13367.3	10384.1	36414.2	30433	9052.94	9330.6	8789.36	10929.1	15980	86889.1	13101.5	12972.6	12150.9	14294.7	10507.1	16094.5	15163.4
1	3220.8	4263.49	3508.68	3736.04	4724.23	7869.25	6996.48	5841.47	5344.48	8967.26	10506.6	5729.97	14806.7	7432.47	5451.78	9701.4	5700.2	6790.49	7130.99	5916.76	27543.3	41751.1	9832.56	7138.77	12645.2	6802.47	165497	16575.3	9258.36	9292.77	12054.7	9427.42	10796.4	8472.56	27426.7	22401.3	7777.99	7754.42	7525.57	9292.77	13358.5	62266.8	10941.7	10682.1	10406.9	11935.2	9334.16	13380.2	12580.3
1	1799.97	4018.46	2688.02	3020.27	3182.73	11598.5	10447.9	6718.16	5074.9	17446.2	23181	6787.01	33150.1	11955.6	5673.66	18234.7	5933.24	9782.17	10238.7	6974.99	68885.2	107446	20219.5	9077.91	23277.3	7614.13	413086	29243.1	14327.9	10217.1	18367	9433.96	14430.8	9971.39	48141.5	37683.4	9316.32	8454.62	7826.25	10217.1	17025.1	116049	12392.8	11830.1	10539.2	13318.9	8672.19	16189.7	15054.6
1	1239.3	2615.94	1704.9	2019.23	2085.96	7112.29	6400.19	4287.13	3337.67	10554.2	14982.3	4606.32	20418.1	7231.22	3617.94	11209.9	4046.16	6431.36	6519.4	4614.15	41316.4	64657	13689.4	5971.96	14321.9	4995.53	256043	18350.6	9534.46	7169.75	11408.8	6389.61	9848.78	6624.26	30400.1	24079	6356.72	5908.3	5568.76	7169.75	11214.7	74672	8590.92	8141.15	7117.77	9243.73	6080.72	10917.7	9595.94
1	5281.23	7053.37	6438.67	5425.69	6998.4	21647.3	10692.6	9831.5	7291.95	15417.1	18836.2	9805.11	22535.3	10342.6	8233.31	16268.4	9915	10911.6	12754.2	10367.2	38814.3	72850.3	17436.6	13163.2	23994.4	10239.9	245365	60236.7	21599.2	62665	20924.5	22504.8	49704.8	24349.3	134075	34025.6	14641.2	14256.8	13387.9	62665	26011.9	95921.8	25505.5	23673	27456.3	29278	17096	42492.3	18958.5
1	7436.66	11562.6	9951.89	7834.76	8289.99	44562.3	19164	16280.8	9777.98	28597.3	39566.5	15389	49084.1	18081.1	11641.2	30834.2	15651.1	16356.9	22173.9	16944.5	92365.1	170028	35891.4	23509.2	49196.1	16151.5	634068	153970	42926.3	172171	42979.4	42226.2	124494	51353.7	364984	75407.6	25084.8	23233	21076.2	172171	53012.2	242861	48815.5	45815	58890.5	64585.3	28351.1	100797	31948.4
1	2674.12	5907.47	4834.6	3316.99	3193.37	27784.1	12047.9	8584.4	4311.02	16154.6	23242.2	7638.03	25087.2	8729.03	4965.03	15830.9	6976.31	8627.05	11382.1	7944.41	49459.2	95150.3	23430	11825.3	23919.1	7228.05	343731	74968.1	25117.8	80392.2	22038	21057.4	58707.1	27026.1	192352	42763.2	14750.2	15171.4	13042.8	80392.2	29636.1	145307	25886.1	25369	29638.3	35612	15488.5	59840.6	18616.8
1	2668.08	6110.43	4588.28	3627.19	3665.66	29784	14772.8	9449.98	4973.42	19721.6	33335	9796.32	39634.7	12109.2	6785.28	21987.2	9987.38	12555.5	16174.1	11962.8	81580.9	147042	37789.8	17802.4	35863.1	9617.31	590297	131900	40168.7	132185	32079.2	30205.8	94637.7	40816.5	312417	58862.1	20727.8	21148.4	18582.8	132185	42073.4	210227	37648.7	34753.1	41401.6	45790	19343.5	81330	21761.2
1	6057.73	6659.55	7063.91	7840.39	7808.01	25067.3	14890.9	16966.8	12264	21692	25122.8	12668.3	25672.6	28604.2	11658.7	18769.8	7926.36	10793.7	16022.8	9277.65	71100.9	157949	20793.6	16410.8	26066.3	9675.92	355516	36781.7	23132.4	10295	22174.7	13336.3	12282.3	12665.5	47609.5	47044.6	12395.7	11384.5	11013.8	10295	17746	95138.3	15962.4	16713.5	11988.3	12462.7	13284.6	20371.8	22434.2
1	5265.69	5837.65	5907.59	6080.51	6639.04	16773.7	10723.6	11715.7	9232.55	15508.3	17232.5	10212.3	18195.4	19149.4	9955.86	14883.6	7476.45	9284.55	12611.2	8099.75	47606	97803.3	16806.3	13184.5	22447.9	9856.79	241372	27768.7	18046.6	10273	18026.3	12734.5	11633.2	12051.2	34433.9	33035.8	11335.6	10735.8	10501.9	10273	15901.7	66213.1	15339.4	15288.6	11803.6	12054.5	12334.9	16659.7	17987.2
1	857.016	1432.27	1343.53	1772.23	1024.22	6378.36	5865.95	4241.91	2667.47	5004.18	10270	2756.91	8761.84	7935.55	2749.31	4024.99	1313.77	3175.08	3849.61	2273.7	29730.6	54149	16977.2	5902.63	7062.16	2230.96	182450	16539.9	14659.4	2513.58	6341.23	2619.59	3371.56	3758.72	21801.8	18405.5	6227.56	3858.08	3577.04	2513.58	6307.59	47891	4815.73	5296.24	2913.63	2854	3520.05	7706.08	7666.15
1	4155.66	4171.23	4498.65	5658.58	5349.54	17078.9	14317	12689.7	8741.62	15508.5	22705.2	10108.8	20671.4	23760.2	10234.6	15096.6	6809.08	10221	13077.4	7849.01	64905.7	143697	39232.5	18130.8	21669.6	9386.99	367497	40214.4	32850	11362.4	20713.8	12972.2	12523.3	14551.2	51255.5	50496	18235.3	13999	14328.2	11362.4	19659.1	102034	15358.2	18157.8	12638.6	12503.5	14252.9	22761.8	24858.6
1	13856.5	16063.4	18487.9	32010.2	17204.9	72694.9	59113.7	77076.3	49698.6	68946.5	105147	45681.7	113327	200545	34234.5	64838.1	18893.2	34362	59288.5	22831.6	355297	811612	63943.5	66249.6	105371	24380.7	1.03869e+06	127014	112551	47791.8	72475.3	32775.3	56745.1	30716.2	197425	175357	28240.5	30351.9	28483.7	47791.8	36973.7	249945	42061.5	39712.5	28034.7	31696.9	26930.1	55659.2	55621.4
1	9020.27	9531.75	10771.3	16466.3	11595	30194.5	27534.6	34105.4	23715.1	26999.9	43483.2	21810.8	42968.4	75024.1	17309.9	25195.3	12023.5	19021.4	28115.2	15096.5	124530	288445	26467.9	28472.7	34592.9	14295.8	364947	47293.4	42856.9	13159.7	26492.6	17065.1	14538.3	15653.2	67837.8	61521.5	14393.9	15318.9	14744.8	13159.7	18599.9	83163.2	19394.7	18818.4	13537.8	14711.1	13846.1	22561.7	22534.1
1	4317.37	4996.28	7306.39	14394.2	4713.47	32157.9	33018.1	37053	22808.1	31794.9	56987.6	20849.4	55377.2	97301.3	14456.2	28939.2	7361.99	18614.5	26882.5	12048	180395	406320	83168.6	34624.9	49366	12131.8	555726	59577.5	65727.4	10007.3	32137.2	11022.2	11779.6	12722.9	90522	81634.3	19751.7	15395.4	14398.3	10007.3	15366.2	118889	16466.2	16279.3	8488.22	9017.94	9069.33	22796.1	22025.9
1	567.524	816.054	1008.37	2066.32	841.558	4595.71	6225.81	5739.62	3809.34	5129.27	12230.9	3293.59	11421.9	16668.5	2813.24	4783.55	1513.18	4107.9	4733.13	2893.53	41451.7	74562.2	23560.8	7964.47	10285.7	2590.8	133236	14349.8	15944.1	1722.45	5957.67	2049.6	2476.73	2702.6	22006.6	15131.5	5011.93	3815.25	3558.45	1722.45	3372.34	27248.9	3221.78	3414.6	1709.65	1801.83	1771.43	4914.08	3953.55
1	7131.67	15004.4	9525.32	11230.2	9941.33	50759.7	35137.4	26831.4	15460.1	59649.1	64427.9	21827.1	81078.2	36712.9	23893.1	53445.8	22268.2	23172.2	32265	19868.8	168190	360214	58870.7	28014.6	81834.8	25971.5	1.17326e+06	111687	37060.3	484443	75615.7	52412.6	351630	36327.8	145751	79201.8	30362.7	31350.3	27255.7	484443	59595.8	290939	43600.4	39323.9	66765.1	85907.5	28733.1	48785.5	38683.8
1	4523.95	8996.27	5709.62	6561.84	6074.78	29000.9	18971.4	15397.9	9275.73	37488.9	38209.2	13301.1	53809.7	21575.5	13681.3	34490.7	14137.7	13775	19213.1	11376.1	112130	216002	37874.5	16338.5	56996.7	15052.8	820248	75559.5	22042.6	407190	50943.9	37371.3	259665	22649.9	100641	49485.5	17355.3	19212.2	16675.4	407190	39045.6	218185	28729.4	24264.8	49921.9	61598.1	17878.6	32903.9	24316.1
1	5806.89	13521.8	7665.37	8327.71	6156.19	43665.3	30485.7	20787.8	10336.9	51325.9	57811.3	17093	65499.6	26468.9	15736.6	42739.6	15293.3	18132.8	22935.5	12577.3	135475	287680	57980.9	20025.8	66366.9	16540.8	1.00755e+06	88221.2	34858	420895	59477.7	45245.3	282838	29359.8	119105	66226.9	23763.5	24457.2	20795.1	420895	53259	268360	39288.1	30787.2	55162.6	72854.8	22916.1	40414.8	31905
1	1128.59	1635.88	1346.55	1365.9	1618.82	3764.76	3342.37	2474.16	1958.47	4319.89	5299.05	2556.78	5356.22	3250.4	2579.11	4653.68	2625.54	3210.27	3502.23	2655.37	12714.1	26934.4	8551.55	3663.14	7896.21	3252.71	111277	11661.7	8072.02	54252.2	8632.95	8224.81	35319.3	5927.35	17751.6	10688.1	5757.2	5551.51	5337.28	54252.2	11019	35958.8	7569.84	6896.28	10072.3	12943.7	5722.55	7978.32	6791.31
1	9703.76	12181.3	8827.01	8237.4	9388.32	19157.5	13678.1	11626.4	9905.02	22449.8	16936.1	9890.57	19996.8	13165.3	10419.7	20673.4	12046.6	10026	10737.7	9669.25	29203.1	39792.5	18410.3	11204.2	24925	10378.9	96964.7	21489.1	12003.1	58958	21636.2	15518.1	61688.6	13615.8	24846.3	15329.9	11771.6	10971.3	10481.7	58958	19147.2	33996	13805.8	14731.7	21705	21237.3	13982.8	15550.8	14219.5
1	4155.04	5514.32	4065.14	3912.94	4476.31	8549.85	5907.59	5300.31	4833.27	9385.16	6438.89	4550.51	7283.56	5389.4	4525.57	8185.64	4985.27	4426.74	4749.07	4390.31	9505.33	12835.7	6515.23	4918.19	9468.15	4907.3	28523.1	7678.45	5128.67	22656.8	8905.2	6817.88	21280.7	5710.88	9239	6603.35	5118.28	5002.36	4767.61	22656.8	8103.71	13311.4	6062.87	6363.18	9013.37	9316.41	6388.95	7096.5	6545.03
1	8060.46	10304.4	11765.6	11281.2	10833.2	50692.2	31866.8	24679	19486.8	39169.3	48737.7	20487.8	45108.3	44729.5	20975.1	42040.5	17075.6	22702.4	26983.1	16608.8	126462	204350	68467.2	41892.8	51049.3	18343	575861	108619	72240.3	26516.6	45275.6	27453	30000	33261.4	176640	72779.3	36730.7	34925.3	35383	26516.6	66509.1	193629	32469.3	52150.9	38646.3	27404.7	31799.1	72744.4	35648.4
1	14099.5	17205.1	21756.2	19534.3	18652.3	86540.8	53234.2	43551.8	34318.3	67934.1	80230.2	36425.8	73795.3	77101.1	38772.7	75363.9	33031.1	39227.5	48796.2	31248.3	213074	374072	110625	75085.7	93181.5	33257.7	1.03188e+06	189907	123083	55540.6	80925.4	50134.1	57473.5	59491.1	324765	142677	64306.1	61065.7	61754.9	55540.6	121297	354554	55976	93384.6	71827.8	49684.2	55532.1	138672	66226.4
1	3220.78	3116.9	4108.71	3546.91	4280.91	11589.6	6138.04	5569.98	4815.24	14046.3	8689.29	5261.76	15587.6	6554.82	7649.14	12997	7801.84	5591.59	6267.87	5268.38	15835.5	23585.5	13502.5	7476.03	16333.4	6618	63932.3	15155.4	7960.24	43768.2	16040	12077.9	43805	9744.99	15625.2	10408.6	7472.96	7359.29	6919.14	43768.2	12394.2	23169	9166.08	8543.71	14368.3	14089.7	8368.23	9376.98	8518.33
1	7314.97	5375.12	11678.6	7812.51	8082.49	52265.7	18794	14881.7	10813.8	62025.6	34515.7	12016.4	75941.6	19262	25748.8	51779.3	26508.1	13820.9	16302.9	11977.8	71351.3	106662	61641.7	22840.7	65848.6	17790.3	336308	69853.4	23257.1	250418	66051	43180.4	236008	34236.9	67718.9	34491.9	19894.2	20534.6	16867.7	250418	41649.7	106341	24866.8	22830.9	62437.3	57871.7	23920.7	29505.8	25711.7
1	1014.23	859.288	1861.54	1373.77	1315.34	9291.32	4042.33	3078.23	1989.35	13108.2	8554.87	2618.38	15543.7	4189.3	4787.08	10619	4981.99	3625.4	3367.89	2456.03	14330.2	22670.4	12852.1	4531.4	12437.9	3502.5	63696.2	11849.2	5249.06	32708.2	11157.1	7485.54	33946.7	6154.48	12104.4	6523.7	3980.04	4191.8	3761.11	32708.2	7926.39	18888.7	5249.79	4279.33	8852.59	8858.43	4130.21	5233.3	4124.68
1	4783.64	3344.98	10155.9	6195.65	5514.7	52739.6	21862.5	14635.4	9198.38	66551.2	42105.5	11763	75330.5	19957.3	24681.6	53547.4	25283.6	16110.7	15450.4	9972.83	71348.9	126786	66275.7	23011.3	65657.3	16034.6	348172	63056.8	30175.4	230453	62765.9	42747.3	233948	33887.4	71801.2	40404.7	20979.9	21767.1	18673.8	230453	48595.4	118908	28544.5	22973.3	58573.7	61751.3	23960.9	30780.9	25649.2
1	3919.38	6242.06	4291.59	3597.81	4459.34	12753.9	6732.84	5675.17	4673.98	19164.7	8732.68	5897.48	13087.7	6851.29	5651.69	16644.5	6543.06	5882.35	6885.09	5849.14	20259.5	33487.9	10841.4	7698.24	24348.7	7294.78	138589	19196.7	9934.87	101522	24342.5	14563.1	62438.3	11219.6	30319.5	13861.2	9051.5	9510.69	8309.95	101522	18368.3	44458.5	13075	11440.1	22869.2	20437	10046	15096.1	11349.2
1	4454.59	7279.6	4577.61	3680.82	4669.21	12420.2	6885.23	5868.86	4684	15457.5	8033.87	5247.58	12193.5	6171.81	5271.23	12583.1	6121.3	5421.27	6081.96	5418.87	17449.6	26530.1	9814.53	6685.22	18325.4	6420.78	120175	17468.8	8109.2	102357	19346.5	12742.5	58375.2	9608.05	26980.8	11728.2	7923.92	8043.29	7119.76	102357	15666.9	37849.8	11171.2	10336.5	21887.6	18354.2	9051.83	13326.7	10426.1
1	9631.46	28941.6	13109.6	7689.42	7193.11	99082.6	38578.9	24088.9	11885.9	178825	68672.4	23782.5	98225.5	35369	20400.6	145425	28102.5	30587.8	35260.5	19375.2	164863	359482	89667.1	37899.7	203855	26675.7	1.21777e+06	124377	59563.8	669439	168999	55168.6	514141	48423.8	191777	76698.6	33576.8	38740.9	29342.5	669439	90761.2	262083	47416.8	38163.2	106198	105818	30455	58874.2	38750.4
1	9835.59	28901.3	11782.3	6311.15	6337.9	61550	36562.8	15544.6	8885.36	86262	53790.6	14239.8	63621.8	22609.7	13716.8	63865.4	18007.9	25753.1	18977.2	14174.2	100087	170279	76874.8	26499	91626.2	17811.2	725007	86462.2	69244.3	447219	89169.2	51747.4	278120	41435.5	144311	46206.2	31135.7	35900.4	29994.7	447219	100929	172001	48458	34645.1	78785.3	64351	29271.2	48142.4	29488.4
1	12774	16897.6	10902.4	10970.7	9679.63	32317	25509.2	20226.9	12889.5	30169.1	44620	13103.7	38103.4	25218.1	13779.4	27860.3	15960.1	13890	16409.6	11651.3	72088.1	150536	43230.4	17036.4	37168.7	17526.6	300107	48259	23606.7	59198.6	33448.2	22700.7	60844.2	27098.8	53238.9	41101.7	23105	16997.4	16121	59198.6	31459.6	102480	20968.4	25788.4	25273.1	30214.9	22740	27881.9	24509.9
1	4931.46	6415.23	4592.38	4727.94	5077.68	11124.1	9034.23	7888.42	6026.74	10593.1	13286.8	6193.77	12150.6	8899.69	6310.55	9835.18	6734.23	6440.2	6750.99	5710.91	18640.5	37836.5	13219.3	7586.72	12181.2	8061.66	69712.7	14368.6	9999.22	17969.6	11397.7	10109.9	18389.8	9811.91	15998.6	13987.1	9136.29	7709.7	7525.73	17969.6	12456.4	28975.8	9726.46	10504.4	10772.1	11757.4	9910.96	10992.1	10543.1
1	4805.95	8183.38	4515.03	4749.23	3577.99	14264.8	13961.5	8761.64	5295.94	12107.5	23703.1	5629.56	16013.2	11886.4	5677.67	11146.4	7025.76	6803.2	7216.45	4961.81	31863.9	65685.9	27166.8	8042.13	14893.9	7399.96	133910	21746.4	12753.9	24152.6	13882	9833.86	24815	11635.5	24464	18423.8	11844.9	8523.72	8421.48	24152.6	14554	46454.2	9392.14	11350.4	11286.5	12923.4	10053.1	12681.5	10641.9
1	14721.4	14997.4	10010.1	10264.4	8551.27	25533.4	23732.4	16267.9	10525.1	23725.7	39219.8	10875.2	30958.7	20325.7	11572.8	21793.7	12208.1	12929.1	12498.1	9140.03	57178.9	117773	46676	15176	27995.1	16979.8	227030	37084.4	22245.5	39031.7	23807.7	17129.9	41250	20034.5	40208.4	31182.8	19569	14792	14514.2	39031.7	24005.2	73494.8	17089.1	19656.3	18257.5	20786.8	16656	20695.4	17769.7
1	8524.59	19635.9	9265.21	11161.8	9931.38	45733	38563.7	21869.6	16890.1	48896.2	60087	18709.5	103125	33563.3	13541.6	41545.1	15894.8	18651.6	22598	16716.4	185245	201115	45786	20577.6	51110.7	19113.2	903651	84749.7	26728.6	234238	46998.2	30386.1	122023	24383.6	104388	40381.3	20138.1	19474.6	17367.1	234238	37179.9	185033	27139.6	23743.3	40897	36619.3	17643.2	28119.8	21580.1
1	10557.5	26392.8	11726.8	14387.1	10812.4	65282.8	55115.7	29766.4	21724.9	67139.8	81306.3	23736.8	132581	43982.5	16258.3	55286.9	19502.7	22369.6	28193.8	18695.2	246774	280194	58414.5	25952.8	70237.2	24557.3	1.24643e+06	116789	36067.9	377272	66328.3	41276.9	186618	32220.1	156413	58897.9	27261.3	28154.7	23616.8	377272	50209.8	279527	33895.3	30938.7	61315.1	54778.5	22815.2	39499.8	30227
1	3314.89	5226.62	3638.07	3885.95	4214.24	10954.5	10061.1	6529	5396.28	14582.4	16848.6	6721.04	25817.5	9527.28	5753.84	14161.2	6709.32	7809.74	8515.71	7158.81	49208.2	51159.1	17345.3	8793.92	20676.6	9073.18	284175	26861.7	14103.8	65067.2	20531.2	15651.6	36667.3	11714.6	33116.6	16628.9	10209.3	10807.5	9945.3	65067.2	18116.9	68408.2	17607.8	12155.5	16295	15334.8	9204.8	12339.3	10410
1	4174.33	10163.4	5046.11	5821.73	5058.42	21133.2	23434.1	11271.6	8989.79	24283.5	37630.7	10062.3	57103.5	18437.4	8607.42	22552.7	9452.44	14204.1	12882.1	10513.7	116719	116853	50074.6	17269.2	33440.7	12548.9	704358	64636.4	47748.5	206913	36426.2	29953.2	94694.5	21863.4	87925.8	32199	18339	20186.2	18172	206913	46246.9	172510	28796	21110	37010.2	32030.5	14781.1	24660.5	17256.1
1	2859.93	3882.69	3121.56	3255.76	4077.18	6240.24	5587.43	4832.72	4132.97	6334.08	6705.93	4403.32	8151.05	4908.75	4137.44	6292.97	4296.42	4712.85	4907.39	4208.43	10320.6	27437.7	6311.29	4776.05	7397.72	4499.68	84002.4	9802.28	5410.08	11543.5	7059.16	6099.61	10017.6	5518.54	11075.8	10900	4984.11	4823.89	4647.49	11543.5	6847.06	25832.1	6602.58	6411.48	5977.79	7209.1	5649.9	6659.56	6593.46
1	2985.92	3994.27	3313.53	3555.85	4353.87	6865.04	6130.83	5358.88	4512.66	8064.59	8833.43	5078.89	12118.4	6001.62	4887.81	8880.84	5174.62	6085.67	6286.84	5071.4	18441.5	54371.2	9640.5	6333.65	13181.9	5768.42	206620	19247.4	7840.59	27609.6	11996.4	8570.66	21836.8	8238.83	24504.1	22804.2	7335.02	6392.1	6024.67	27609.6	10929.4	68215.9	10860.2	9699.08	8755.45	12097.4	7686.56	10565.4	10683.7
1	2501.35	4202.37	2834.06	3257.15	3984.5	7863.72	7648.57	5350.07	4582.41	9421.82	11425.6	5558.95	13177.5	6815.26	5264.85	10180.7	5468.25	7576.02	7413.06	5446.91	20829.8	65694.6	22054	8546.89	14330.4	6339.8	212044	22884.3	17616.3	26890.4	14469.5	11504.9	22624.5	11331.6	27964.7	28156.1	12536.3	9778.9	9157.42	26890.4	15302.5	67417	12965.2	13227.4	11216.5	15021.8	10536.3	13762.6	14129.9
1	3611.39	7199.19	4484.16	5001.79	5543.88	14913.6	13479.6	9053.82	6555.72	20742.1	24335.2	9253.03	32214.8	12371.7	8391.21	22145.1	8740.32	13511.6	14240	9029.6	51119.6	153588	32169.8	13202.4	36245.4	10552.3	532826	45407.6	21960.9	46219.9	27387.9	16152.2	40881.3	16943	53772.3	51865.2	16307	12992.8	12016.6	46219.9	22936.1	150615	20224.2	18378.3	15336.6	22347.9	13513.9	20280	21141.6
1	9852.69	15301.8	11979.2	15539.4	13069.7	54677.3	37689.2	30703.2	22550.1	47745.3	59010.3	22312	77310.2	50056	19857.1	40903.6	14400.3	21799.3	30262.6	17358.7	185096	441611	50524.1	26228.5	62610.7	20268.7	1.1038e+06	89023.1	36024.9	18220.2	49277.5	22917	35000.8	26279.1	132777	86004.9	21597.1	19868.5	18193.7	18220.2	39123.1	377928	37266.9	32152.2	20072.6	26542.1	19872.6	37121.8	30673.9
1	10230.5	17957.1	12470.8	16733.1	14674.1	65021.9	47539.8	34809	25265.6	55190	73515.9	25190.5	94441.5	58113.8	21961.2	45455.1	15856.4	24405.2	33317.3	19325.8	227078	508742	59001.5	28671	63788.6	21052.7	1.26507e+06	103378	37982.3	18587.6	50007.5	23179.5	37635	27708.7	151524	90879	22316.5	20165.8	18562.9	18587.6	41474.7	416928	36110.6	33192.5	20004.4	26952.9	19594.8	39890.6	30849.2
1	3075.96	4074.8	3478.51	3870.75	4608.19	9268.95	8462.91	6564.19	5664.4	8342.39	11221.1	5624.03	12204.4	8613.72	5418.8	7484.41	4783.17	6008.59	6453.13	5439.29	23454.4	47449.2	15469	7281.76	9861.15	5737.9	130375	14149.2	11756.6	5740.41	8758.57	7200.18	7548.7	6849.04	16824.2	12235.4	7371.33	6773.69	6586.25	5740.41	9104.19	42500.3	8596.92	8361.37	6935.87	7292.03	6563.88	8908.71	7892.86
1	7243.24	9405.89	8172.62	9083.36	10527.7	20946.6	19487	14995.2	13011.4	19199.8	26555.5	13261.4	29048.5	21045.7	13420.3	18986.2	11670.9	15331.3	16701	13437.7	69799.4	148676	48893.3	20880.7	30039.1	15831.7	492809	50195.2	43517.1	17050.9	29106.1	21220.6	23816.3	21363.7	68193.4	45103.8	23172.8	20803.3	20044.3	17050.9	30518	188100	28688.6	26719.8	20384.9	22667.6	19495.5	30844.5	26059.1
1	10482	28166.7	11402.1	11219.8	8216.96	59894.1	33752.2	34308	16709	80965.1	71952.5	21449.8	113891	48742.2	15140.5	74462.3	19169.5	19032.9	32571.7	15568.5	179149	541833	50962.7	25426.1	104047	20541.4	970727	96894.2	29318	162972	87730.2	27638	184163	27220.4	102848	78984.3	21182.5	20749.3	17087.5	162972	34296.9	289393	30204.4	29025.7	28429.2	44526.3	19168	32795.4	30508.6
1	4967.02	9539.09	5409.34	5841.11	5909.36	21649.4	13315.7	14150.9	8902.12	34612.9	27254.9	11222.6	43566.2	20755.4	9716.9	34244	11131.2	10301	15280.9	9723.12	66034.7	181001	23118.9	13640.8	49100.3	12671.5	338721	38239.2	16661.3	59429.3	40146	15513.1	67222.2	14127.1	41135.5	34017	11959.6	12543.9	11061.9	59429.3	18258.6	116405	19353.2	15878.1	14877.9	21311.6	11392.2	17547.3	16996.9
1	5475.77	10404.7	6003.99	5790.19	5700.19	18642.1	14025.5	12829.5	7683.63	27394.1	27613.3	9951.85	34212	17351.7	8284.6	26670.7	10046.5	12371.1	13584.5	9770.1	58687.3	157269	40533.5	14374.1	42761	12270.9	386839	41272.7	24502	60128.4	40102.7	17741.9	65135.3	16196.9	48136.8	36617.5	16720.1	15159.4	13404.4	60128.4	24754.5	141674	22798.6	19326.3	17645.7	24514.8	13523.4	21419.6	19818.1
1	11646.6	31415.7	12841.8	13060.6	10773.6	57670.5	48202.6	35645	18693.4	75851.6	92689.2	23572.8	116461	51677	20340.6	69601.8	22486.1	32815.5	33401.1	20101	200111	547272	167027	41318.1	100414	26820.6	1.21141e+06	129923	103170	207261	95321.7	43202.7	203042	41979.6	153011	99766.5	44716.5	38234.2	34664.1	207261	65987.5	402288	47711.5	45753.6	45757.6	61676.6	31418.7	54752.6	45612.8
1	7370.12	11174.3	7907.94	7382.27	9227.99	18644.7	13939	11674	11120	23129.2	21650.5	11629.8	37257.8	14906.6	10646.3	21759.3	11128.4	13094.8	14593.7	11729.7	46290.2	105369	25020.3	15312.4	26604.4	13231.4	250484	40854	20782.4	44154.8	27968.2	24452.9	38329.3	22370.8	52948.5	42437.9	17831.1	18482.5	16887	44154.8	32827.1	73654.7	26316	23425.1	28421.2	28926.8	22092.7	25698.2	24203.2
1	8892.08	14839.9	9886.7	9306.05	11503.9	26627.4	19563.7	16556.9	15744.2	36370.9	34290	16945	62644.1	23853.8	15842.5	35178.2	16358.2	20342	23960.3	17830.3	86210.5	216082	45402.4	25715.8	49114.7	21665.7	564453	84109.7	40802.4	102298	56900	45607.9	86903.2	43131.2	125897	98800.9	34528.5	35048.7	31094.7	102298	69217.2	181139	48423.6	45773.1	59902.4	61863.3	43194.3	53577.3	50785.2
1	3642.73	5742.02	4208.67	4154.8	5340.69	10594	8900.44	7235.73	6118.51	15856.1	15363.1	7292.39	23792.5	9193.18	6706.74	14609.1	7436.39	8687.17	9336.08	7658.26	29527.5	60742	18231.2	9374.27	17500.1	8470.1	148266	22599.1	12716.7	18553.3	17377.8	11883.7	18121.6	11480.7	27106	22600.5	9533.29	9496.18	8817.01	18553.3	16695.7	39652.3	13741.2	11697.8	13158.5	13031.4	9896.23	11760.3	11585.5
1	4815.88	7037.5	5164.03	5226.31	6364.99	12689.9	9846.54	8475.7	7362.99	18742.9	17388.3	8725.92	27194.9	11202.1	7829.52	18021	8193.02	10660	11980.3	9232.55	36789.8	81992.7	20893.4	11602.9	23582.6	10248.3	218989	30924.8	17923.8	29898.3	24981.6	17911.8	28174.6	16477.8	43894	37832.4	13935.4	14241.5	12348.9	29898.3	26110.9	69670.4	19399.1	17568.9	21454.2	21546	15647.5	19808.1	19400.9
1	8143.57	10324.1	12067.4	16971.8	10183.5	49170.7	29177.2	45105.9	36202.7	68282.8	62064.4	28087.5	88597.8	115629	26002.7	64341.4	13015.7	21651.9	42602.1	16078.1	161596	630967	50394.3	44310.2	117750	19048.2	538094	76261	85133.5	16287.8	79888.2	17267.5	21651.3	18777	130415	205059	19642.9	23232.3	20563.1	16287.8	24161.4	166189	25427.7	26128.6	14948.2	20684.4	15529.9	34543.6	60804.4
1	6373.8	6866.28	7522.51	8072.95	9231.64	19076.4	15239.3	19389.9	16796.8	23266.9	24636.8	12975.7	30158.2	39242.2	12678.4	21680.5	9295.88	11791.5	17624	10434.1	52769.4	206227	21261	19184.9	35330	11188.4	187396	32378.4	33573.3	10934.9	28681.6	12798.2	13068.8	12180.2	56293.1	76576.1	12942.4	13522.4	12815.1	10934.9	15228.3	70899.5	15162.3	16434	11538.7	14177.5	12066.5	20488.6	28929.3
1	7538.93	11803.8	12477.8	21175.4	11242.9	56560.3	54574.5	58395.8	42217.8	69549.8	99052.2	29263.5	114495	129039	31720.7	58842.8	13014.5	35137.4	41180.2	19477.5	199007	669117	217348	55525.2	87034.3	18426.2	563950	87823.2	108291	14247.5	62356.7	15370	19054.9	18522.3	126522	160703	48986.8	28857.5	26429.8	14247.5	22325.6	141192	20460.2	24506.9	12712.7	17460.5	13984.6	35353.8	53336.3
1	6738.86	8769.06	9027.67	12036.9	9546.42	28398.5	26201.4	27932.1	22285.8	33945.2	46482.8	17852	54434.7	60906.8	19918.9	33591	11793.5	19822.8	26155.6	14118.7	106118	366185	99200.5	36831.9	56371.1	16069.2	373556	64000.7	70566	15770.7	46970.2	17017.9	18760.8	17370.2	100645	123729	34337.5	24804.9	24375	15770.7	22142.2	118803	21354.7	24353.7	14545.8	18300.5	15788	33650	48515.3
1	11237.8	16583.8	11036.9	10793.5	12380.9	47588.1	40019.2	29958.7	18248.3	68047.4	67917	20482.4	50454.8	35037.1	24286.1	62094.8	21576	19571	28267.9	14896.5	83183.2	291355	32752.3	41092.9	69086.2	21034.6	472657	58801.1	72606.2	145019	58997.2	27314.8	204447	22167.2	88605.1	78346.6	19900.8	26011.7	24291.3	145019	36795.9	169784	28864.3	23921.2	35826.3	66288.6	18084.2	28546.6	29050.4
1	15801.3	28956.9	14989.2	14343.7	11993.4	59507.7	49087	31468.1	17347.4	75526.5	87149	22401.8	66963.6	38346.2	25980.2	71437.2	23664.8	22245.4	30492	15464.8	114687	360514	42432.1	47458.4	83295.5	22496.8	717826	81981.3	88356.7	226638	68299.7	33785.2	275134	25165.7	132121	96267.9	22106.3	29722.9	27546.4	226638	43905.6	252546	34443.4	28099.8	46400	83960.3	19137.9	35574.7	33752.1
1	2874.99	3605.83	2721.62	2587.84	3128.53	6397.39	6447.06	4853.75	4152.06	8984.67	12949.7	4005.44	6038.85	6230.62	4411.19	10605.7	4139.21	4733.51	5294.12	3594.34	13132	29527.1	7461.86	7889.53	16253.3	4872.17	61651.5	8734.77	15688.6	6926.77	10547.1	5790.54	11098.7	5039.75	13061.8	14557	4997.51	6287.28	6097.68	6926.77	6884.23	35221.8	8275.03	6235.71	5872.96	8810.08	4693.63	7325.98	8519.44
1	7748.42	14802.5	7373.6	6981.11	6337.28	25446.5	35132.2	17799.5	13347.6	38960.4	80032.1	12019.6	28408.4	27232.9	14358.1	44288	11755	19066.2	16518.5	8901.87	74986.2	158303	51882	36060.3	61628.1	12710.4	379611	43498	88047.7	27828	41211.5	15160.4	54528.3	15694.5	69431.6	63004.2	19171.7	21656.8	21050.4	27828	24294.6	182626	24957.3	17605.5	18049.4	32417.1	11290.7	26929.8	28005.4
1	9740.03	14947.5	9420.32	9412.03	9016.25	29640.3	33867.5	21838.9	17032.8	44703.9	74952.3	14430.6	30195.6	32732.7	17762.8	53513.7	13893.9	15422	20524.2	11101.3	78391.6	198791	26929.5	40744.8	72857.2	14343.7	390250	40426.5	89731.4	28378.8	48183.8	17826.6	59774	16962.7	70186	76256.9	14169.7	22439.1	21978.3	28378.8	24502.9	196045	23875.5	19470.4	20074.4	36552.4	13622.8	29404.2	35700.9
1	16947.5	26543.4	17369.8	16139.9	18786	52685.3	61663.9	38381.3	37531.1	76513.9	119114	24801.2	48643.1	53258.4	30060.1	80747.4	22625.9	24396.4	32127.9	18531.6	107952	282711	40301.2	59775.2	97033.1	22397.6	478571	55115.6	118483	38984.3	64762.1	23700.5	74851.2	22536.5	80512.8	87012.6	19694.5	29483	28355.8	38984.3	30055.4	194179	28709.4	24241.4	24141.4	39259.5	16964.1	30763.4	36921.6
1	13684.4	24961.7	13587.7	12720.7	11735.4	54402.4	42724.1	30235.9	16091.4	80080.6	89623.8	23706.6	62442	38258.4	26406.4	78242.4	24433.3	27092.8	34579.9	16846.6	112917	375506	56678.4	50005.4	104945	25543.5	769236	86646.9	100459	242994	80462.7	44821.9	294679	32792.2	143811	122692	30406.5	37227.1	34413.9	242994	55345.4	318097	52084.7	36075.8	56565.4	110287	26397.5	51443	53812
1	7549.63	13426.1	8093.27	7953.78	7888.22	28276.2	24530.1	17401.7	10507.4	43792.6	52158.9	14907	37709	23444.8	17470.4	45528.7	16112.9	17865.8	22252	12419.7	70907.2	217522	36951.4	31761.4	63154.8	17148.5	447306	54206.5	59243.3	120188	46545.7	26979.1	150189	20650.3	84010.4	67709.1	19704.1	22695.4	21835.2	120188	32848.2	169497	31480.8	23129.8	32374.9	57720.6	17320.6	31594	30916.5
1	4047.14	5341.82	4452.48	4760.8	6187.88	10728.3	8969.63	8454.98	8197.42	12793.3	13251.1	8527.47	20414.9	11624.9	8006.33	11424.1	7184.23	8433.61	10295.9	7819.04	30774	51376.2	15319.3	10333.1	14109	8684.56	144108	22734.2	12076.2	8704.53	12606.5	11107.2	10692	11417.3	26326.4	16383.4	9723.68	9410.51	8747.69	8704.53	14017.5	35995.7	11665.2	12821.7	10570.2	11125.2	10586.5	12782	11784
1	7336.75	14578.9	8576.29	9368.47	8715.26	41712.4	27398.3	20273.3	15556.7	39572.3	44496.7	19107.1	78471.4	33599.8	17278.7	34765.4	12308.9	18331.9	26203.7	14625.4	145494	226464	62215.6	26897.5	54288.4	17577.9	748961	112572	33993.2	17508	45118.6	21725.1	27956.3	32338.2	155485	64768	25464.9	19992.8	17712.1	17508	46960.8	212573	26908.6	37573.4	23471.8	25427.6	24269.9	40322.7	29931.7
1	8468.91	19492.3	9987.18	11358.9	9867.07	55287.7	42910.2	26029.7	19312.3	52145	64900.7	24170.4	106311	42007.8	21847.7	42373	13925.1	26163.6	32065.1	16593.4	196583	299420	118449	39205.4	69246.6	19515.8	1.13084e+06	152197	78386.2	21985.2	62523.9	27094.8	36035.1	44313.3	212136	93561	43013.6	33866.3	30517.5	21985.2	65518.5	343292	39709.4	53335.6	31798.8	34480.8	35001.7	68774.7	51001.7
1	7996.55	21335.6	10037.1	11597.9	9181.47	65102.6	51836.5	28809.5	21118.6	65773.4	82519.2	26449	139475	48368.5	23701.9	50638.9	12898.7	30018.5	34350.5	17538.6	246354	345996	149399	43674.2	85990.6	19130.5	1.36648e+06	189636	100659	20614.5	76051.5	24882.7	38613.9	49028.7	253502	106957	50368.5	37185.5	32060.8	20614.5	76544.8	428413	50845.2	61593.3	32544	35658.1	37522	78728.8	54717.1
1	7511.12	11842.6	9350.43	11189.9	8208.12	46068.4	22562.1	27479.3	16387.1	40800.3	37833.6	21703.2	41284.8	46514	15054.3	31893.3	11013.4	14612.9	27233.3	12193.4	128892	373120	34117.8	24623.8	54883.6	14153.7	786717	73661.8	40150.9	17089.7	50187	20304.8	23059.5	22405.2	120917	135145	17147.9	18219.5	16682.5	17089.7	41175.5	287651	27219.6	29689.5	27260.3	24404.4	21380.8	48476.7	65382.7
1	4800.49	7002.27	5802.61	6789.28	6067.13	23550	12342.7	15001.3	10101.2	22069.4	19663	12929.9	22323	24345.7	9950.08	17715.1	7834.62	9626.14	15545.6	8265.03	59469.6	165390	18278.6	13900	27153.9	9316.45	319405	32321.8	19246.8	10160	22341.4	12675.7	12482.3	12059.4	45554.6	51264.1	10490.4	10564.1	10165.1	10160	19194.2	99190.9	14518.5	15733.5	14160.6	13493.2	12179	20630.3	26341
1	2536.71	4380.84	3693.63	4473.6	2947.35	22383.5	11073.8	12804.7	7493.31	24326.2	21299.6	11799.5	23727.2	25700.1	7972.62	20079.5	5339.77	8586.8	16546.8	6292.21	75681.5	215810	23750.1	12868.9	35738.9	7383.43	445659	36657.3	21415.1	10300.6	25993.7	9665.91	11999.2	10575.5	54057.7	64386.9	9716.97	8964.67	8278.82	10300.6	18755.3	134082	12300.8	13419.3	12186.8	11032.9	9155.6	20557.6	29362.6
1	688.113	1380.89	977	1348.22	768.498	6807.74	3972.6	3909.21	2146.36	6519.31	7002.59	2906.61	7782.51	7023.4	2065.24	4781.99	1272.9	2498.94	3888.02	1561.78	22732.5	57562.1	11918.3	3728.36	8006.12	1621.48	132491	10899	7468.07	2169.64	6198.83	2027.82	2970.99	2576.43	14759.3	15045.6	3324.56	2352.25	2022.82	2169.64	4616.3	35313.7	3295.13	3343.28	2920.91	2649.01	2226.91	5031.38	6476.54
1	3361.79	4020.75	3701.37	3831.3	4331.32	7946.73	6553.65	6194.85	4979.93	7657.5	8483.1	5759.32	12297.8	7560.74	5441.16	7571.08	5041.6	5561.64	6650.88	5262.97	22169	50462.1	9248.47	7023.7	11746.2	6288.71	148388	14840.5	9476.94	8789.97	10555.7	7829.97	8905.49	6893.33	23422.1	15942.6	6629.46	6608.32	6194.4	8789.97	9313.05	50364	10398.1	8487.41	7276.6	8347.73	6945.2	9643.73	9433.58
1	4098.14	6023.47	4832.73	5323.08	4965.37	15444.3	12116	10928.4	7268.3	16064.1	19494.5	9233.67	32792.7	15773.9	7577	14774.5	6180.62	8304.54	11266	6828.5	65273.6	163220	19142.5	12534.9	22713.8	8308.33	464957	37335.8	17766.6	17759.7	19775.1	9667.7	16873.8	9780.47	68041.9	39634.6	8271.3	8725.54	8096.14	17759.7	14738.8	142544	13742.4	12083	9767.7	13179.6	8514.79	18026.7	16900.5
1	2596.1	3667.15	2713.34	2933.74	2351.16	8907.97	8133.31	6206.34	3890.86	9301.92	14297.1	5925.92	21431.9	11236.3	5615.11	10636.3	4239.76	7044.87	8975.4	5013.54	58140.8	148880	40523.9	13698.2	20944.4	7650.28	518442	40699.7	33682.8	15087	21012	10496.1	16258.7	10591.7	72454.4	41313.6	13688.4	12382.4	12171.4	15087	15963.2	156945	14517.6	13824	10999.3	13570.3	8766.9	19851.3	18703.4
1	3733.97	8629.41	5911.76	6944.44	4471.21	24551.4	29294.7	17985.3	10195.4	24113.2	47891.7	14930.3	68274.7	28610.9	13014.6	21918.5	8644.14	16208.4	18410.5	10721.3	133605	281445	93210.1	28009.5	35090.9	14248.8	873282	71643.6	74082.5	20556.5	30910.7	14348.4	25070.5	16647.7	112569	54481.2	21201.2	20573.6	19475	20556.5	23174.8	211141	20241.7	19662.1	14574.1	17441.6	11284.6	26025.2	21031.7
1	7282.83	8888.68	9869.49	12167.1	11147.9	39530.4	28695.5	34359.8	51416.1	83685.8	59997.6	30542.6	137039	105260	48427.9	85176.6	15112.7	29189.1	53049.7	18962.8	198046	487637	114804	73090.2	168731	22275.9	561169	191275	111601	18899.9	136327	20006.8	26602.6	32053.4	252043	200736	47005.2	34806.4	35186.9	18899.9	42834	195636	28085.4	72667.7	19664.1	26735.1	25538.3	88659.1	63398.4
1	11377.1	14884.5	14766.5	18131.7	13029	44064.9	27720	40786.4	28074.5	48549.9	53655	23585.2	38413.4	75781.4	23573	48182	13111.4	19929.1	33395.6	15642.2	95509.5	303771	32842.7	34865.6	62821.4	16169.8	295097	57003.4	56483.3	14430.8	51379.7	18472.5	17332.8	17880.7	94991	86913.8	20263.8	21120	20428	14430.8	24521.9	112923	22417	31124.8	15834.5	16597.4	18339	43048.9	34129.4
1	12190	15286.7	15577.6	18489.9	16151.9	51477.5	36767.2	36275.1	45437.8	63431.1	57720.2	29282.7	107090	80646.8	43434.9	63453	18987.3	31534.6	44682.3	21110.2	155041	361385	121302	68946.3	123042	26768.4	454291	170879	104347	28587.7	111886	32321.8	32614.3	38955.2	225500	161432	60545.5	44441.4	44810.6	28587.7	49152.8	170057	41626	76409.2	29692.6	33932.4	34887	96270	68842.8
1	4714.41	6210.34	6268.85	7185.07	6982.56	17812.4	14634.8	12861.1	15567.6	20812.8	19621.8	10468.2	34048.6	25621	14546.5	20087.5	6821.71	11363.9	14498.6	7832.86	47136.5	108077	40705.3	21318.4	32774.5	8639.65	125933	47097.2	29276.6	8311.44	28995.1	9586.67	9890.09	11211.2	58627.5	41425.9	17843.6	12642.7	12889	8311.44	13916.4	41953.4	11072.2	19988	8803.19	9952.37	10118	24602	17565.5
1	5500.54	10389.2	6545.83	6759.15	7253.76	25448.4	13955.8	14169.6	10197.2	19776.8	29017.5	12132.6	23966.2	24195.6	10585.8	19603.3	9705.55	12600.6	17874.6	9129.15	61029.7	150785	25653.7	19244.3	26400.9	11095.7	265379	69021.4	28123.9	13426.9	22593.7	14707.2	21454.3	18627.7	128281	52869.9	16171.9	13543.5	13222.6	13426.9	41265.5	90833.7	18094.5	29883.6	21947	20700.9	16969.8	51362.2	24091.2
1	4726.47	6631.88	4957.11	4915.51	5698.24	14527.7	8709.52	8987.97	7125.01	12612.8	15662.4	8270.53	14620.4	14095.5	7942.4	13503.5	7305	8981.83	11611	6795.39	33198	78846	16453.1	12773.2	19729.1	8389.38	136396	36689.8	16771.6	8988.5	14779	10057.1	12521.4	11776.8	61367.6	27606.6	10653.1	9566.23	9376.3	8988.5	21633.4	45020.3	13936.4	17586.6	13192.5	12670.9	11065.9	26536.3	14276.2
1	4160.27	7553.33	4898.84	4697.57	4976.42	20541.7	11393.8	10699.8	6926.74	19217.1	25742.6	10134.5	21554.7	19649.9	9345.66	20707.2	8535.83	12315.6	16519	7970.2	59227.8	133614	32533.6	17846.7	34167.3	10689	264411	61733.1	26891.1	11860.9	24436.7	11530	19188.9	16446.2	111227	48085.6	16408.3	13475.4	12578.7	11860.9	35519	88083.8	21660.8	26273.6	17952.5	17230.8	14336	47732.7	21522.3
1	1942.07	3449.62	2149.71	2269.49	2999.07	7643.37	5490.43	4280.28	3341.52	5911.04	9137.74	3883.98	7371.35	7109.93	3665.01	5672.09	3290.47	4515.04	5190.08	3162.61	16051.1	37094.8	14404.6	6484.12	6969.24	3748.51	62141.5	17566.2	10356.7	4533.16	6914.49	5311.64	6039.35	5893.91	28418	12720.7	6795.3	6249.91	6063.94	4533.16	10841.3	20810.8	6422.84	8698.23	6575.89	6314.46	5658.19	12505	6732.03
0	2877.19	4002.39	3598.58	4133.32	4342.01	9314.79	8449.51	6831.36	6116.44	10643.9	11128.4	6170.87	25212.9	10604.8	11321.8	10565.7	5244.17	6358.26	7930.91	5947.87	53453.3	73295.6	24786	9294.49	17619.4	6727.53	228796	28616.4	9486.27	9834.52	13993	8360.01	10297.3	7513.31	27227.6	20011.7	7307.29	7312.7	6582.11	9834.52	11050.8	49902	10746.2	9329.23	8951.98	9207.39	7601.74	10260.3	10706.7
0	2778.38	3813.89	3363.14	3976.49	4287.32	8581.87	7853.71	6440.67	5777.64	9553.28	9583.59	5662.88	21267.4	9407.53	9985.26	9247.49	4793.64	6020.84	7259.29	5615.1	46269.1	66002.7	20959.4	8207.8	16072.7	6014.67	204332	25283	8549.22	9243.18	12887.4	7686.45	9525.25	6945.84	24244.3	18316.8	6558.35	6542.96	6073.59	9243.18	10237.2	45767.2	9866.07	8715.91	8683.41	8806.29	7138.7	9452.45	10333.4
0	2253.94	4796.52	3496.14	6152.85	3649.16	29909.2	26303.1	16008.1	11710.9	41693.8	43042.6	13419.9	104696	33997	34329	33662.4	7040.05	15194	20530.9	12081.5	228291	316762	103597	24089.7	67524.7	12061.8	901607	110919	32491	23527.5	57885.1	13608.6	25815.5	16446.5	120775	85143.2	15916.2	15903.7	12744	23527.5	24945.9	233731	23721.4	19205.6	15661.5	16286.9	11280	24718	29781.9
0	1577.29	3426.97	2494.36	4345.37	2413.78	21819.5	18556.2	11262.6	8524.89	30275.1	29940.9	9505.13	75875.1	23633.1	24134.3	23990.7	4597.56	9757.24	13807.4	7919.1	159008	218262	68960.6	15484.9	45327.1	7498.11	609172	73875.2	20143.5	15420.5	37666.7	8202.99	17100.2	10181.5	80552	56339.6	9573.92	10242.3	8077.36	15420.5	16064.4	154838	14394.4	12339.1	10049.2	10507.2	7220.69	15906.5	19695
0	5328.99	8707.27	7413.14	6801.95	6919.25	35604.1	14704.8	11642.4	9935.29	39077.8	19027.4	9666.69	40088.4	18970.8	9564	42909.7	13861.4	10869	13148.3	12847.2	57074.3	104132	24607.9	12829.5	63339.1	15148.3	165212	38720.4	13768.4	102546	60404.4	32322.1	170637	27258.6	42782.3	16891.4	12070.2	12200.3	11014.5	102546	25391.9	36053.5	28393.6	14608.6	31025	21005.7	15153.6	15543.3	12567.5
0	8535.56	15117.6	12519.1	11068.9	9335.72	68124.6	24402.8	18227.2	14795.3	65000.6	29144.6	13023.3	65667.7	30150.1	13517.3	68178.7	21213.8	14788.7	18153	17543.2	90899.6	171635	38572.6	18681.5	102382	21634.1	273141	66505.6	19731.5	197761	104742	54501.8	319937	43592.8	69424.6	23813.1	16639.3	16862.1	14379.4	197761	38319.2	61242.8	47395.2	21641.1	59266	37458.7	23951.8	21464.7	18768.3
0	3689.18	6272.8	5187.03	4830.17	3966.55	29303.1	11725.7	8886.44	6046.43	37551.2	17365.3	7571.86	36189.5	14900	7630.08	44711.1	11652.9	10393.2	11979.9	10804.2	58411.3	124299	27756	12500.1	80240.8	17172.2	220490	45466	17753.2	135296	84943.4	44849.4	237542	37415.2	58126.4	25053.5	14918.4	16834.7	14499.3	135296	32610.3	60581.3	40818.5	18311.1	41850.9	31296.3	18483.6	19333.1	13963.5
0	6233.96	12329.7	8896.37	8630.77	5933.45	57432.3	28100.6	16313.8	11022.1	64972.8	37672.4	11643.4	68347.7	27551.3	12603.7	74228.1	20771.7	22465.2	19540.3	17925.9	112108	236974	70188	23221.7	129988	25435.5	422875	92022.2	37925.4	297219	147575	85385.3	480638	71721	127709	42513.6	27965.7	31682	26653.1	297219	72506.8	114901	78279.5	32840.9	87347.2	59567	35881.5	35613.8	25126
0	18933.3	54930.4	22724.1	18818.7	13026.2	138576	58163.5	35921.4	28257.6	175082	80395.5	25175.7	133576	52772.1	32932.1	138367	40475.7	22873.7	31252.3	18151.6	191910	295901	98613.9	31853.4	161364	26846.5	659357	96758.7	31541.7	374844	110594	38924.2	437241	39914.5	101145	49432.5	25978.4	25447.4	19623	374844	54208.2	148078	29820.9	27766.6	76902.2	75853.4	28418.6	33312.6	30698.7
0	4818.41	9582.07	5655.09	5234.39	5657.59	28698.5	15956	11725.5	10055.2	53580.4	26192.8	10127.7	42213.7	18411.5	12462.9	45104.8	15681.3	9751.66	12199.6	8901.49	61079.3	93109	33371.3	12894.4	52471.1	11848.9	207699	33124.7	13434.5	119456	37303.2	17200.3	139955	15704.9	33860.8	19006.9	11504.8	11888	9870.4	119456	21748	49583.1	14119.5	13189.6	26935.1	27182.4	13100.8	14754	12269.9
0	9521.97	26582	10512.9	9311.92	6657.85	62770.5	33628.2	19607.3	14626.2	89404	54664.8	16424.4	71730.1	32151	20345.7	80563.9	26153.3	21210.8	22321.2	13676.7	127685	223572	80880.7	26668.8	112768	22720.8	583497	82729.7	38054.2	367989	89378.2	44338.7	392418	41003.8	108148	60595.3	29080.8	29175.3	24503.2	367989	66382	182432	35839.8	33295.5	84190.4	95649.2	36130.5	44754	38722.2
0	7690.88	18850.9	7712.1	6726.3	4967.12	40125.2	21627.5	13055.5	9641.36	55511.5	32415.6	10388.4	41766.9	19327	12316.4	46355.4	14939.7	12455.8	13278.1	8749.73	68761.3	117453	44666.4	15547.4	61255.7	13190	300488	45162.3	22280.2	180287	48201.2	25916.3	190791	23655.3	59160.5	33478	17932.1	17997.6	15256	180287	39473.1	97355.6	22665.4	20500.6	46037.9	50783	22147.2	26414.1	22191.5
0	3823.45	6354.75	4511.32	4998.51	4806.57	19287.4	12494.2	7292.01	7257.55	16771.7	13096.4	6243.88	36269.3	10773.5	10999.2	14906.2	7348.11	7077.82	7564.05	7015.61	52784.6	31380.2	24303	8948.29	21967.3	8692.24	131256	34513.5	10106.9	91812.2	24327.9	18525.8	57393.9	13054.8	38865.5	12329.9	9855.21	10249.3	9059.56	91812.2	15922.1	40265.4	20718.9	12997.1	22812.6	16601.5	10970.8	15865.1	11252.9
0	3101.64	4771.14	3527.31	3849.96	3948.69	13318.2	8358.76	5588.9	5586.81	11362.9	8509.45	4835.22	20788.8	7185.53	7198.68	9421.16	5324.88	4976.13	5293.46	5117.79	27346.3	17578.6	13164.7	5962.94	12393.7	5789.04	65005.4	17238	6579.88	45934.5	13031.1	10423.6	29136.1	7691	18964.5	7482.91	6130.98	6315.88	5858.91	45934.5	9499.31	19882.4	11347.8	7801.11	12390.1	9531.89	6830.38	9070.5	6956.83
0	1293.13	9633.92	5087.82	8808.12	5110.09	60357.3	41941.2	16033.6	18027.1	52130.1	62183.2	12942.8	149181	35834.1	36805.6	41898.9	16327.7	25652.7	18273.9	18168.7	233898	130873	125353	38662.6	70823.7	18154.2	577964	136390	74524.9	325801	78926.4	55937.2	194315	44181.9	162737	36572.9	30863	42886	34368	325801	90684.6	142175	69457.6	35807.1	64146.7	40332.8	27770	45651	23088.5
0	6067.06	13787.1	7255.45	9457.63	5017.24	56308.8	38666.1	16049	16134.4	49471.1	43848.5	12485.9	111237	30088.8	29906.7	42185.1	15781.8	17384.4	17940.2	15390.3	198396	131924	96996.4	28389.7	71947.4	18302.3	575785	132469	42981	366592	81063	54115.2	222997	38657.5	163204	42498.2	27234.1	32080.9	25885	366592	62093.1	166219	58221	37469.6	76553.8	53737.9	29481.4	55610.7	29491.2
0	4288.47	9954.08	6606.39	12696.3	6630.98	43992.7	30213.1	22807.1	21288.9	46274.5	41960.3	19127.3	159064	53487.8	35437.6	46605	18164.5	17380.5	27256.7	15619.4	314611	398186	99491.4	29848.4	75267.3	19375.5	887526	108902	26128.8	248555	53740.9	31568.9	322044	33581.6	87412.6	40249.1	23014.6	19730.3	16814.4	248555	36744.8	129417	32603	22654.5	41626.3	43731.5	16534.2	23002	19352.7
0	7104.95	12453.7	8304.25	16256.4	8879.94	68381.4	46675.6	32100.6	32235	72388.2	62494.5	26697.1	221162	71972.8	48106.3	63975.5	25779.1	24798.5	36993.4	22668.5	413098	503247	136517	42457.1	103984	29918.2	1.1387e+06	164076	44949.8	470969	98376.3	62101.9	577712	64759.9	167668	75843.6	37449.9	35410.1	29901.4	470969	61656	247139	58895.4	42423.1	77096.4	81295.8	31956.3	46483.3	35672.1
0	1193.85	2616.51	1584.26	3217.49	1538.35	12957.8	10638.7	6041.29	5307.84	12427	13371.1	4617.15	39399.9	12243.1	8068.5	10535.8	4428.76	5324.11	6508.69	4809.08	75822.9	88109.5	33797.4	9469.23	18055.2	5684.44	246960	32533.9	15138	79161.7	18473.9	12592	92495.5	13363.4	37244.2	15422.9	8659.72	8385.7	6872.11	79161.7	16205.5	53051.3	12741	8330.68	14033	14047.2	6081.18	9360.41	6691.57
0	2162.42	4357.87	2682.2	5294.69	2604.07	21223.8	16712.4	10204.8	8632.48	20446.4	20827.6	8080.67	58576	19881.7	13056.7	17641.8	7452.36	8963.95	12339.7	8765.2	121344	151931	48481.9	15060	34549.1	11033.3	421029	53588.6	21908.2	126566	35457.6	21112.2	156626	22907.9	63039.4	30308.5	14777.6	14650.3	12546.7	126566	25733.3	102773	21794.7	15580.9	23936.6	27030.9	11474.4	18022.2	13172.8
0	8888.65	14026.1	11042.7	16335.4	12312.8	61618.8	36978.3	34646.8	22458.5	42486.7	59958.8	24582	69822.1	51779.5	43015.9	37613.6	14748.7	21709.8	32902	21229.1	165613	438690	97170	37012.3	58307.2	23542.5	918250	116540	43509.4	24193.5	53042	30373.6	35235.2	36205.1	129539	93736.1	25956.5	22402.3	20443	24193.5	48776.6	230671	43226.7	32621.9	32249.3	26204.1	31315.8	37029.9	36152.9
0	4514.77	6101.74	5331.96	7274.91	6698.45	22424.1	15483.2	14561.2	10245	18365.2	26736	11886.8	30989.9	22369.4	18848.3	17243.2	8201.71	11250.1	16101.6	10444	76751	190998	43532.2	16758.2	29330.6	11683.4	444409	53118.1	19907.3	11577.5	24184.5	14184.3	16736	17062.7	62902	45654.3	12129.5	10413.3	10013	11577.5	23778.9	121267	20955.7	16311.2	15744.1	12979.6	15935.6	19504.1	18201.9
0	2914.1	3740.64	3281.98	4231.9	3934.19	12667.3	10224.8	8060.16	5541.56	9457.8	14485.8	6211.9	14807.4	11427.2	9339.97	8814.74	4531	6697.1	7920.18	5758.26	36706.9	93517.6	36603.1	10406.6	12564.7	7096.85	221078	25541.1	18445.1	7308.37	12624	9157.17	9561.82	10461.1	28825.4	22087.4	10182.1	8971.94	8306.87	7308.37	13643.9	54462.8	12462	10276.2	10200.7	8217.92	8984.69	10429.7	10594
0	3910.31	5857.23	4862.58	6838.1	5363.06	22826.2	19799.5	14844.6	9599.79	18929.4	34390.7	11622.2	36238.1	23976.4	18727.9	17937.3	7621.44	13720.4	16098.4	11616.6	94224.3	208724	83475.1	21216.5	35292.9	11999.8	579651	65290.2	40694.2	12521.2	28976.3	15383.3	18734.9	20257.4	73236.7	50038.6	19359	16384.5	13945.9	12521.2	28441.9	152044	28386.4	19867.3	18231.7	14060.3	17249.3	22366.1	20721.9
0	4832	8092.64	6759.51	6906.13	6887.95	34116.4	15914.6	15512.6	11311	39546.2	36067.7	13334.4	30092.3	25115.6	14653.6	51122.6	8843.89	14724.2	20453.4	10276.2	75645.1	145076	30905.7	18574.2	72769.4	14807.5	356403	61809	21415.9	14374.9	59720	16071.8	20345.7	21793.6	65355.3	40407.8	13740.6	12890.7	11662.1	14374.9	27053.8	94034.7	17174.3	18295.1	16292.5	18790.4	14183.6	23134.4	19281.7
0	2870.92	4205.94	3647.87	3775.21	4346.15	13039	8015.25	7112.63	5875.56	15607.3	16528.8	6438.19	14480.6	10808	6847.17	20887.4	5328.22	7847.47	9552.22	5923.48	37636.5	57511	15906.6	8970.67	30703.1	7797.03	180269	32421.7	10248.8	7421.51	26847.6	8514.79	10572.3	11540.9	33513.4	18114.3	7221.84	6665.45	5979.47	7421.51	14947.3	51011.3	9604.13	9850.45	9370.91	10668.5	8013.64	12953.9	10090.7
0	3707.14	9507.4	7034.14	7020.06	5346.41	45468.9	27167.7	17640.6	11766.4	52643.6	61495.6	15508.7	44256.9	33266.9	16598.3	69376.2	10033.2	27789.4	26195.1	11984.4	123720	213795	73877.2	27584.7	107025	19591.4	603602	99211.5	49684.3	18886.7	87643.3	21456.7	28889	32868.6	101466	60295.4	24577.5	23702.7	20015.1	18886.7	40069	161256	23985.8	26782.9	22862.5	25711.9	18616.4	33408.7	27026.4
0	1789.93	3715.8	2776.5	2934.64	2489.19	16055.3	10957.2	6806.07	4916.81	20802.8	27545.5	6580.26	22593.9	14054	7772.13	30453.6	4539.24	13465.6	11776.2	5703.89	70118.5	101265	41773.7	13640.4	52786.1	9623.54	375731	62936.4	26237	10301.9	45429.9	11606.9	16013.3	19716.4	67904.3	33139.7	14242.6	12773.9	10286.2	10301.9	26007.5	114549	15347.1	16443.4	13819.4	16387.3	11248.1	23216.7	15929.6
0	5008.32	6269.51	7599.52	10393.7	5965.63	32934.2	19070.6	25260.1	23690	32423.8	37503.3	18314.6	54338.6	61199.9	31840.4	33457.8	7518.29	14801.8	26072.2	9857.18	131645	267149	60181.4	40265.1	75526.2	12441.6	542819	95860.9	58113.3	10352.6	43233.7	11010.3	13062.7	13611.9	123845	73944.8	21010.2	17668	18789.5	10352.6	16543.2	136425	16802.3	33758	10320.7	13245.1	11018	49329.3	31909.7
0	8087.03	10121.7	12165.2	16786.8	8363.78	52902.2	32538.4	38248.8	35670.8	43830.2	61258.5	26363.7	80703.2	88287.5	46957.3	42213.4	10275.7	21619.8	36834.1	14390.8	186505	347258	88723.3	56171.5	83429.4	16669.3	693072	136435	78678.4	15310.5	52523.9	17171.2	18837.5	20126.6	173762	88616.9	29371.2	24619.7	25483.5	15310.5	23913.1	162241	23087.5	44128.2	15018.5	18764.2	15437.6	64375.8	37208.5
0	2310.33	3235.98	3888.86	6209.9	2746.05	22710.3	17465.5	17993.5	16061.7	24141.3	34515.1	12140.9	43187.4	42381.6	22159.4	23791.3	5069.24	13007.6	17707.7	7886.8	99656.8	170527	66944	28354.1	50512.7	10162.4	348334	60944.8	43528.7	6246.18	29007	6568.62	9287.98	9347.72	70376.1	39068.6	17074.7	13488.8	13380	6246.18	10458	71765	10686.4	18413.5	5731.54	6771.99	5948.38	24702.5	14582.8
0	3383.2	4502.64	5411.08	7915.22	4392.74	23741.4	22390.8	18844.4	18441.5	20657	35471.1	13333.1	43969.4	45207.2	27039.2	21374.8	7487.57	15687.6	19113.1	9965.22	102621	176946	91774.2	38057	44091.4	12360.1	379723	80259.4	67608.8	11536.8	32064.7	13271.3	13741.7	16498.7	95365.4	49840.3	27364.9	24404.1	24644.3	11536.8	17488.9	86071.7	14971.6	27817.3	11231	12314.8	11806.5	35793.7	21616.7
0	6617.18	7949.17	8051.17	11165.4	7460.46	28946.3	19413.3	22010.1	20233.4	26207.8	31850.5	15333.6	40265.1	48238.5	15899.2	23786.9	9053.65	13074.7	21297.8	10183.6	84384.8	241309	28665.7	21216.8	34927.3	11701	321505	46797.3	32718.4	14555.3	26407.8	13977.1	20498.7	15515.1	74397.8	74758.8	14364.4	13520.9	12915.3	14555.3	28965.9	111587	17455.2	23159.1	18370	23628.7	21595	33113.6	30957
0	8788.22	10642.8	11620.2	14642.9	10860.4	37054.2	25454.5	29136.3	26509.8	33451.5	38858.1	19810.9	51376.7	56250.8	21769.7	28280.8	12118.4	16493.2	24329.8	13863.2	94228.7	243275	35964.3	25884	38600.3	15136	300135	47284.5	33696.3	16384.7	28029.6	17927.9	22269.7	17861	59881.2	63175.9	16735.6	15931.2	15169.5	16384.7	27255.9	82758.2	22660.9	23178.2	18805.5	22206.3	22001.5	25322.7	25655
0	5583.31	6524.86	6748.28	8728.86	6842.51	19063.4	17376.8	16716	15200.6	18669	27430.3	12233.5	31596.4	30936	14274.8	17441.5	8662.24	12488.7	15435.6	10231.3	59844	133084	41812.3	19274.7	25390.1	11586	196780	33769.7	29617.9	13001.4	20114.4	13736.1	16422.3	13604.6	42776.7	42966.2	16285.8	13821.7	13301.3	13001.4	21187.9	65352.9	16975.2	17925.1	14601.1	17462.9	17399.2	20853.8	19814.6
0	12049.9	13382.4	14847.3	19396.3	13728.9	51276.5	36371.6	41302.2	37380.2	54183.8	63924.9	32136.4	86102.8	86633	36799.2	51853.7	21100.9	29630.8	47688.8	24019.6	178740	440103	81270.5	51328.8	87341.5	30650.5	678103	103401	78171.9	42638.4	63971.2	44548.6	50565.2	41254.7	147670	159277	40837.8	38319.2	36302	42638.4	70131.5	242217	67798.7	58601.6	47271.5	58340.5	58361	68333.7	69391.7
0	4126.31	4823.2	4930	6540.08	6161.48	16191.4	12814.5	16424.8	18652	24276.8	23439.2	12047.4	52376.6	40848.2	35386.9	21566.8	7417.35	10878.5	17280.6	8817.06	78206	237243	62624.4	24079.6	41849.5	10595.7	283927	58233.2	30204.7	10180.4	36786.6	12413.3	12937.3	14705	71912.9	82620	14177.4	14048	12273.5	10180.4	21227.6	105305	15504	19825.2	13021.4	12307.5	14841.5	23089.7	28465.5
0	10248.7	10933.5	10448.8	11765	13693.1	24073.7	21337.4	24060.1	27270	27314.5	29919.2	16971.5	55404.2	44898.5	40120.4	22537.1	12809.7	16178.7	20932.9	14106.6	70743.2	215309	66340.9	29327.8	33994.3	16270.1	237307	59699.7	32893.3	16007.6	33294.1	20566.1	18695	20774.9	63441.7	66145.9	19935.5	19351.6	17905.8	16007.6	26716.1	75422.1	21441.9	25238.8	18799.7	18583.3	19934.6	24548	26057.9
0	5914.37	7119.94	7449.55	11119.7	6800.09	28196.3	21945.4	24048	24198.5	28827.1	31542.7	13992.9	64688.9	46981.9	40989.9	22365.3	7864.51	12482.1	17461	9049.43	84290.6	250335	87948.3	26623.1	36164.9	10387.3	280399	59079	30642.9	10690.7	31806.4	12496.8	12355.2	14497	63806.1	65348.7	16719	14030.8	12781.4	10690.7	19468.6	81984.5	14881.3	17882.5	12101.5	11325.2	13806.1	20913.1	25234.6
0	3269.76	4073.63	3910.36	5158.29	4622.5	11958.2	11530.7	10751.7	11351.3	13265.1	17213.3	7598.98	33669.8	21894.1	20739.1	11278.4	5173.83	8145.63	9564.83	6014.43	45974	118060	58197.1	15068.6	18001.8	6527.92	140219	31209.4	19420.1	6035.46	15979.5	7538.7	7241.37	8403.05	31142.4	28281.4	10710.7	8734.96	7939.3	6035.46	10736.1	36508.9	8545.57	9871.36	7335.52	6977	8041.19	10805.5	11368.1
0	3258.7	3734.71	3510.29	3544.24	4496.52	6632.1	5494.09	5015.44	4767.93	8483	6206.54	4864.46	14294.5	5906.11	5676.88	8223.23	4683.84	5627.78	5588.51	5284.16	15157.5	33583.8	17940.6	6225.88	13445.1	6012.62	51050.2	17623.2	6922.97	7280.01	14009.2	8048.88	9002.12	9158.18	16958.7	14470	5794.73	6256.54	5679.29	7280.01	7604.18	21682.5	10324.2	7380.25	6569.98	7116.46	6265.38	8061.6	7989.52
0	5013.16	6513.25	5694.64	6422.79	6373.32	17179.7	12838.8	9827.38	8185.74	22816.5	15276.5	8169.49	47385.8	13127.1	11359.6	18319	7445.67	9882.06	10585.7	9103.47	45688.2	106935	55470.4	12283.8	32145	10093.9	160258	50531.1	13602.2	16858.4	32061	15179.3	20760.2	19633.3	46283.8	34004.8	10220.2	10941.3	9556.19	16858.4	14341	52057	20427.5	13173.7	11275.2	12910.3	10344.3	15682.7	14167.7
0	8989.74	9429.81	8775.81	10221.2	9269.97	28489.5	23569.6	18572.5	13160.8	45799	35105.8	15014.8	98986.6	25053.4	22727.4	40046.9	14476.9	21707.9	22743.1	18985.7	100514	223936	123330	26651.8	77266.5	22418.6	333829	102834	31684.8	29278.9	72702.4	31237.5	40254.6	41075.1	90823.2	71094.2	24238.6	26034.1	22947.1	29278.9	31599.5	103315	45628.3	28658	23512.3	25967.5	22496.3	30809	28618.5
0	2376.46	2855.05	2496.83	3002.12	2733.33	8561.08	6337.55	4853.16	3812.59	14016.9	10073.2	4810.96	32997.3	7985.3	7479.59	13780.2	4777.1	7542.08	7920.6	6262.46	38241.3	87796.2	48651.3	8832.66	27904.2	7205.21	149037	43550.8	11068	11386.1	27525.8	12352.3	16031.4	16249.1	39646.7	29619.3	8326.07	9083.08	7949.4	11386.1	11630.6	45198.4	17792	10631.7	8933.58	10056.4	8179.33	12313.6	10878.6
0	4069.88	4325.32	4458.29	5266.2	5512.06	16427.2	10275.7	8860.88	7924.1	13457.9	12262.6	8811.19	33985.4	12885	8983.03	13042.8	7329.76	8468.97	10922.9	7597.63	54604.1	85581.2	21683.2	12483.7	20460.8	9421.96	294335	42366.7	14852.9	75489	17468.3	16923.6	55468.4	13587.5	54270.1	25696.5	11844.5	11650.2	10658	75489	20495.4	74475.1	16755.3	15627.2	20417.5	22012	12542.5	17515.4	15120
0	3232.08	3568.27	3650.17	4300.58	4737.55	11156.7	7739.89	6926.42	6256.54	9960.32	9354.41	6933.55	23807.5	9205.84	6813.09	9753.3	5607.26	6885.15	8564.39	6251.28	36160.2	53043.7	14020.3	8875.15	14317.8	7118.79	172015	24077.2	9912.86	35662.4	11330.9	10920.4	27808.9	9060.24	28265.6	15467.7	7823.32	7886.47	7509.43	35662.4	12768.9	41437.1	11005.2	10553.2	11987.3	12804.8	8457.03	10999.6	9817.38
0	1587.2	1853.85	2090.36	2707.7	2407.73	12175.9	7683.14	5771.64	4710.86	11216.9	11283.8	6135.83	30029.6	9673.04	6594.38	11002.1	4710.5	6858.8	9069.59	5866.53	51234	82266	20211.3	9276.74	19949.4	6670.09	291169	34783.6	13895.1	56221.9	15033.8	12283.4	47555.5	11121.1	45948.7	23612.4	9653.89	9307.11	8518.14	56221.9	17320.2	72074.9	13286.6	12108.4	14655.6	17467.9	8375.7	13586.7	11295.9
0	1599.18	2407.68	2239.53	3457.79	2436.91	20647.7	13623.9	8454.52	7082.05	18119.7	19274	9131.7	64399.1	17201.1	10149	18363.5	6314.21	10679.8	13798.6	7141.59	119169	186734	53669.4	18179	35181.6	9910.86	707703	83722.9	34089.7	168601	28796.6	23160.1	113222	18814.6	114137	47635.9	16545.5	15653.1	13139.7	168601	35344.6	166187	24304.5	20209.4	31761.7	35595.8	14127.5	25893.7	20090.7
0	6625.04	9694.14	8337.92	11725.1	8445.66	32698.3	20466.2	19548	17110.9	31801.7	34170.2	19946.7	61159.7	40340.2	27543.5	33087.6	11636.9	17943.1	26679.9	13677.4	147542	365766	59861.9	31283.4	58366.3	17007.4	845265	99660.4	38754.9	30815.3	40030.7	24695.9	42368.1	24336.1	104599	83972.8	19612.5	19365.1	17385.8	30815.3	43898.3	194480	30572.2	28749.5	29996.6	28937.5	23018.6	35522.1	37049.3
0	5022.19	7270.81	6323.08	8446.16	6700.74	22784.5	15031.5	14815	12608.4	21565.4	22970.8	13351.3	40347.9	25912.6	17736.7	20610.8	8096.1	11904.7	16629.1	9222.59	86141.1	202442	34838.9	18607	30798.7	10727.4	441902	52685.7	20600.2	15647.6	20766	13657.3	21883.9	13485.3	52859	40334.4	11298.2	11010.4	10130	15647.6	22459.7	89518.2	16016	15334.1	15997	15390.7	12605.1	18426	18474.8
0	3329.1	6026.56	4153.06	7083.56	3893.92	21788.6	27753.3	15640.1	13184.7	19963.5	42648.1	12215.7	56885.1	30927.9	20738.3	18082.7	7719.47	16619.8	17242	11279.7	132152	236321	118753	30691	30030.9	13484	668407	89705.9	82141.8	19608.9	30145.7	17213.1	29575.8	22283	106525	67336.6	29186.5	23419.6	21056.8	19608.9	34392.6	185594	23264.3	25687.3	22153.9	19788	18085.9	33566.9	28241.7
0	2658.27	4115.81	3421.68	5608.74	2483.05	17764.4	14846	11271.6	8326.57	17926.2	24183.5	8551.22	34277.9	19031.6	11802.1	15138.7	4400.26	9176.28	10804.7	6353.04	80444.6	167054	53739.6	16818.2	28756.5	8024.3	470880	56343.6	34028.9	13512.9	25717.5	9962.53	18733.8	12982.4	75066.5	56656.5	15983.6	11958.5	10518.7	13512.9	23321.5	157713	18973.5	17419.6	14003.6	13643.6	11331.9	24374.5	24677.6
0	7194.35	6723.71	6905.25	6391.34	8021.02	14093.2	9740.9	8567.48	7655.2	15251.9	10844.7	8229.51	11326.2	8749.31	9230.77	15322.2	8186.44	8108.47	8780.61	8180.69	19275	19592	14151.6	9167.83	20340.9	8876.69	70634.4	18457.8	8891.6	42277.7	21504.4	13442.9	23336.9	10161.6	17555.9	9098.49	8231.14	8995.35	8330.98	42277.7	12109.5	19110	11691.6	10250.4	13312.1	11260.6	9040.17	10048.9	9388.51
0	4588.52	4922.14	4796.5	4651.57	6093	10176.1	7300.27	6838.87	6169	11159.1	8007.55	6302.45	8684.89	6878.28	6942.33	11125.6	6520.5	6352.06	6768.19	6386.15	12826.5	13147.7	9614.89	6782.58	14723.2	7176.48	40548.1	11981.3	7115.5	30123.9	15262.7	10541.8	16156.8	7792.51	12197.2	7314.26	6550.59	6986.45	6681.32	30123.9	9803.49	14104	9286.24	8260	10683.9	9327.38	7629.57	8215.77	7924.73
0	3767.59	6084.91	4782.03	4961.09	4156.26	22330.8	19835.9	8629.62	6682.88	26500.9	28251	6693.56	26256.3	11615.6	11001.9	24402.7	8072.18	13091	8459.36	8451.35	50500.9	39477.4	33169.7	11539.2	34733.4	9176.47	183738	36738.8	19569.4	92152.1	36605.9	18597.3	45399.1	14467.7	37422.9	11097	9432.95	12083.4	10204.6	92152.1	25601.8	36569	17151	11236.7	19516.2	13194.8	8901.9	11820.5	8557.66
0	2589.96	2338.78	2345.06	2306.5	2311.53	5932.25	4751.69	3121.8	2393.81	6519.77	5989.41	2537.23	4300.56	3197.98	2993.67	6630.02	2989.02	3736.12	3081.76	3181.01	9462.6	8814.95	6882.87	3213.77	9499.86	3376.8	40863.7	9394.48	4944.33	20495.9	10830.3	6475.08	10793.1	5000.12	9600.43	4029.62	3804.14	4334.67	3900.56	20495.9	7324.59	11129.1	5560.95	4716.66	6354.74	4807.53	3779.32	4407.41	3520.54
0	7777.22	8950.33	8878.69	11540.9	9916.04	24455.9	18785.7	22029.4	15837.7	25214.6	29925.7	16537.1	43706.8	46570.8	28217.5	30388.1	11476.8	17627	26304.2	13417.7	106568	347855	61467.1	28773.8	55695.9	15552.5	457925	71713.3	35645.2	16062.1	31786.9	19689.3	19488.7	20005.8	67605.3	85157.3	18230.5	18094	16786.8	16062.1	27392.8	94323.3	24528.1	24154.2	17806.7	18217.1	18449.4	24656.3	36748
0	6125.45	6463.41	6368.01	7831.87	7487.18	16799.2	13085.8	14845.9	11388	17435.3	20800.2	11904.4	26959.6	29893.6	18911.9	19903.9	9192.5	13079.4	18431.9	9988.42	70732.2	240238	41568.2	20906.4	39792.4	12075	339359	51766.5	27950.1	13781.3	24774	17501.5	16362.2	16643	53398	70348.4	15673.5	15599.7	14084.5	13781.3	23292.7	78406.8	21288.6	20498.1	15843.7	16068.3	17089.8	21642.2	30988.1
0	1963.61	2953.73	2832.86	5356.52	2506.74	15875.2	14630.5	13372.1	8310.46	17619.1	29074.3	8758.68	37193.7	32958.3	17961.2	18200.2	4826	12709.7	16428.6	7712.18	108563	300819	100906	23394.8	45044.7	9513.05	516903	79822.5	47555.6	9592.27	33021	9251.45	12856.8	14604.3	100752	124619	26405.9	14718.4	13641.4	9592.27	22017.1	157248	18776.2	19656.3	8785.5	9598.73	10116.5	26662.1	48131.5
0	4905.14	6854.71	6777.58	12344.6	4848.94	30316	30400.4	26169	15561.8	25734	49127.3	14594	54634.4	54984.9	28664.3	25403.3	8296.63	18164.4	24100.8	10796.6	153009	449813	163772	38763.5	47043.5	13556.1	776615	123600	84141.6	15700.2	45715.1	17146.7	20481.3	24099.6	160049	178883	47608.2	29226.1	29308.9	15700.2	34855.1	226753	24465.1	32524.5	15978.2	17017.1	18988	44100.9	68312.2
0	3601.12	5986.33	4391.56	3945.06	4826.45	14565.8	7028.01	6271.18	5788.08	18324.2	9429.95	6935.54	17010.2	8951.23	9624.71	18835.4	6857.06	6998.47	9106.38	6254.1	30297.4	58188.8	24157.4	10606.8	30969.7	8339.02	212806	37087.7	11400.7	67589.3	24450.9	18371.6	53752.6	14149.9	34740.6	16239.7	10506	10648.9	9276.47	67589.3	29268.5	47681.8	13933.9	13336.8	32258.3	20560.4	14946.2	13643.5	11476.5
0	4081.93	7980.16	5659.11	4915.29	5447.39	21966.7	9069.56	8211.2	7268.4	26347.8	11655.5	8266.17	22027.1	11767.5	12229.4	24640.6	8171.85	7969.54	11005.6	6983.34	37253.5	79321.3	29442.2	12813.4	37913.6	9337.98	255691	43975.9	13393.5	82396.9	29523.2	20693	70750.5	16153.9	39891.8	18796.8	11836.4	12047.9	10196.4	82396.9	33468.1	53204.9	15255.2	14732	37476	24750.3	17217.5	15566.7	12915.7
0	946.292	2207.62	1258.17	970.04	1073.99	8771.14	3275.01	2427.03	1843.94	12085.3	5443.44	2777.12	8957.26	3764.73	3922.11	9395.59	2185.74	2917.14	3849.88	2221.31	15549.9	32153.9	12378.9	4026.78	14991.3	2912.32	107125	16409.3	5200.89	23522.3	13118.1	5986.8	22299.7	5736.55	16685.2	7227.29	3444.1	4077.94	3280.88	23522.3	9950.6	24690.5	4797.83	4223.86	10527.3	6879.77	5418.82	4871.02	3319.73
0	1359.18	2596	1550.15	1215.53	1288.55	9256.72	3891.32	2701.12	2210.82	12065.7	6156.46	3084.95	10789.1	4559.38	4806.16	11094.1	2750.13	3635.64	4763.44	2735.77	20475.5	42060.8	17386.6	5577.66	19811.3	3990.87	167508	26911.7	8560.69	57206	20457.7	11202.6	46289.4	10377.2	32025.5	13115.4	6010.54	7020.78	5561.57	57206	19405.5	49336.9	8751.69	7951.95	22470	14943.5	10923.2	9599.07	6465.09
0	3317.49	3928.24	3816.41	3712.17	4387.41	9690.95	5636.78	5880.52	4795.27	8486.8	7417.89	5130.71	7421.12	6960.49	5708.41	9483.69	4762.4	5346.84	5789.56	5111.32	12748.4	29520.3	9291.26	6628.53	15985.7	6082.27	51681.3	15516.9	7871.16	7662.3	18348.2	8539.31	8599.37	10599	18319.1	13410.2	7188.2	6106.2	5761.29	7662.3	16384	21888.3	8438.47	8725.43	11033.3	7708.61	8085.95	9485.54	8881.94
0	5688	7905.65	6928.53	6622.42	7072.8	29532.5	12782.5	12918.1	8891.82	28074.1	23292.8	10384	22901.8	18700.1	13377.5	34919.8	9246.3	12384.3	14885.4	10401	54261.6	134440	34282.2	17242.3	73428.8	14088.1	292750	67697.4	22025.1	17781.6	88052.6	21822.4	25091.4	40734.8	82344.1	48349.7	20150.4	14650	12756.6	17781.6	65030.4	100192	23771.5	23144.5	34278.9	18513.1	21522.5	28683.3	23188.5
0	4702.09	7756.96	6286.75	6689.19	6254.65	27492.1	20414.6	13429.1	9806.54	24765.5	33162.5	11336.2	26685.6	21741.5	13726.2	30742.7	9595.54	18947.3	16154.9	13060.7	58169.5	119480	62782.8	20519.1	54520.2	14554	241565	60194.4	34384	17264.1	58399.4	19971.9	23357.5	33701.2	62530.4	37075.7	24907.6	22426.4	18856.1	17264.1	48448.5	68458.3	22839.8	22435	26239.6	15583.5	18239.7	21232.8	17450.6
0	1831.94	3876.79	3115.16	3192.64	3413.3	20704.1	11322.8	9394.89	6024.23	24239.1	26193.3	8583.31	22442.2	18185.4	11652	36073	7392.3	14931.9	14206.2	9999.52	59620.1	148329	50549.6	17051.4	72615.3	12060.1	289654	61819.9	24787.7	15098.4	75942.1	17211.9	21670.9	33500.5	67650.7	42448.8	19808.5	15946.3	13030.9	15098.4	50094.8	78772	19548.4	18920.2	26453.8	13722	16228.4	21649	17777.7
0	6621.88	11638.7	8115.66	11671.4	8095.37	55382.7	30146.1	24981.1	21181.2	70576.1	49844.8	23203	118534	46035.3	83596.7	57583.8	15231.1	25243.9	32949.4	19296.3	206771	445721	211706	43106.3	109022	21520.3	887995	184183	43495.4	59678.9	95519	32675.5	80360.6	60282.9	170463	97302.8	28679.9	23821.5	20492.2	59678.9	44693.8	242845	45107.2	42141.8	30617.9	35818.2	30068	46012.3	34328.3
0	5253.18	8433.37	6104.56	8129.78	6654.37	31660.9	18468.8	15189.6	12922.3	37437.4	28097.9	14081.4	62281.8	24187.3	42233.6	28913.4	9899.94	14452.7	17740.7	11679.2	103829	213303	108171	23215.7	51317.3	13273.6	461308	95485.2	23180	36071.4	47934.7	19411.5	44341.5	32798.8	91103.7	49670.9	16363.9	13967.6	12342.1	36071.4	25893.6	126766	26998.6	24442.3	19440.5	21559.7	18301.5	26893	20177.1
0	1803.22	3855.72	2405.11	3572.87	2493.16	19495.4	11607.9	8844.52	6947.18	29212.8	22080.9	9835.39	50100.2	18639.8	33002.5	25865.6	6640.31	12918.9	15688.4	8926.83	99856.8	213170	110618	21104.7	58535.4	10577.9	536320	98233.3	26923.9	35311	53818.6	18541.2	43425	35550.2	98304.9	57473.7	17796.2	15372.6	12472.3	35311	27014.8	157899	28318.8	25055.1	17840.5	20693.1	17336.5	28091.2	20823.8
0	2553.54	5143.44	3123.18	5038.9	3033.54	24887.7	16964.5	10893.3	8913.64	34042.2	29217.7	10975.8	57851.6	21282.8	36686.8	27628.9	7655.13	15814.6	16488.6	10374.7	105643	214247	129059	24322.8	57445.1	11895.3	517750	97818.4	36116.8	34035.5	52721.2	18933.2	43136.4	34463.2	95660.9	55792.9	21958	18161.7	14990.5	34035.5	27714.1	148056	28320.7	25723.6	18190.4	21126.3	17604.2	27423	20220.3
0	6221.68	10675.4	8207.88	11793.7	8630.94	34794.6	25876.4	18480.6	15372.3	29205.1	34922.8	18704.4	67707.3	29674.5	11560.1	29643	13548.1	15969.2	23543.8	14129.7	151633	192675	32105.9	19071.7	40129.2	18388.2	1.04227e+06	77126.5	25593.8	231291	35014.5	33419.7	95184.7	25086	74089.9	36362.6	22909.9	20594.5	18874.3	231291	36114.6	152146	30333.9	26126.4	30923.6	32420.4	19428.2	25801.4	22302.7
0	4985.87	7889.1	6020.21	8902.04	7121.01	29028.8	20430.4	15669.6	13391.1	24162.9	26356.4	15699.9	55129.9	24080	10099.8	25284.3	11651.3	13402.5	19765.6	12017.3	123645	153583	26035.6	15334.7	35874.1	16027.3	888021	58306.9	21873.1	186100	29948	27742.2	72140.5	20387.7	53311.8	28565.5	18659.6	17036.3	16191.5	186100	29957.7	116069	26458.9	21106.7	23444.8	24895.7	15596.7	19570.6	17865.9
0	2298.02	4800.93	3180.98	5485.6	3080.16	23542.1	16369.5	10814.6	8044	19647.6	24431.1	11640.8	41604.7	17467.8	5320.35	17944.5	6493.42	9128.93	13924.5	7149.15	104278	135897	21183.2	10662.8	27898.7	10089.7	932487	55987.6	19846.8	246106	29875.5	22581.3	81663	17387.8	73880.6	34926	13082.2	13989.2	12330	246106	26737.6	192884	21523.1	17946.6	23775.4	26337.9	12083.5	20997.3	17036.6
0	3240.68	9022.71	4862.1	9978.18	4724.14	44147.6	41573.9	20003.8	14765.1	35347.5	59712.4	20414	99060.5	33862	10229.9	30928.5	12167.1	19221	24830	15215.3	235985	252699	63659.8	22598.9	45961.4	19467.1	1.70212e+06	115783	65943.4	455821	48474.1	40104.8	140777	30921.4	138517	52488.6	25623.7	25923.7	22890.3	455821	53978.6	298227	36322.5	29258.4	38908.6	37208.1	18234.8	32325.8	22648.3
0	6063.01	10007.2	7081.27	9221.76	7149.75	32725	23061.4	13648.1	14374.6	27541	25241.1	10711.1	59898.8	21875.6	18190.3	22717.3	13479.1	11306.1	12799.6	11634.9	78549.1	73363.1	40217.3	15219.6	28881	16944.5	232428	45467.4	16775.5	126709	26728.4	23438.1	92394.5	19000.8	47111.8	22176.5	14938	13575.7	13027.4	126709	29283.7	48433.7	20437.8	19286.4	32216.2	30471	15950.1	20573.4	19105.7
0	6326.27	10665.4	7211.2	10364.2	6838.08	40184.4	27813.5	15618.2	16920.5	36108.4	32572.6	12837.2	86469	28465.8	24037.5	31354.9	17235.9	13160.1	16022.7	13619.1	130961	120543	67108.9	20750.5	46113.3	19306.3	461265	86034.5	23664.8	305167	45620.7	40760.2	201579	31542.8	97640.4	38273.8	22511.1	20160.7	18204.6	305167	53681.2	106402	32299.7	30698.3	65008.5	61131.3	26345.8	39086	35541.4
0	1927.04	3954.43	2214.48	3334.43	1665.85	14318.8	9766.02	5334.21	4947.45	13589.3	11999.4	4322.7	30284.9	8942.17	7469.33	11433.2	4960.76	4489.4	5539.07	4018.92	50144.8	49124.4	25207.6	7254.47	18784	5861.55	218358	33349.7	9901	140088	18478.7	16487.7	86094	12505.7	42909.4	18003.1	7880.41	7548.82	6641.51	140088	24142.6	55806	13602.8	11571.3	28359.2	29818.1	10076.8	16714.4	15316.6
0	4130.54	8270.23	4482.7	7110.12	3672.59	29563.3	24460.9	11016	11437.3	24371.2	26286.2	8195.38	58198.4	18884.2	16584.7	19269.7	10390.6	10591.2	10204.6	9017.62	81603.8	75404	52692.3	15718.9	27722	12347.8	269104	52602.8	24324.8	142241	26964.4	24680.4	101811	20269.1	58216.1	24198.9	15314.8	15380.5	14969.5	142241	37423.9	58127.9	21179.7	19169	33721.1	32194.6	15858	21214.2	18527.7
0	4952.97	7412.04	6554.35	7953.16	6363.99	40643.7	20557.7	15655.5	11934	33818.2	28437.1	12788.9	63011.6	22434.5	28545.8	30551.8	12265.2	12250.6	16321.9	12872.2	123513	130137	66048.1	21573.2	46396.7	15229.7	481747	77302.1	22018	202857	44322.1	31056.4	130420	23638.6	75632.8	28870.9	16093.4	15866.8	14297.3	202857	34717	100973	41346	19535.1	44672.9	32243.1	16541.6	21607.1	18089.8
0	3525.51	4886.33	4155.43	4932.38	4753.63	21388.4	11283.7	9139.25	7312.73	18114.9	15455.8	7846.62	33344.9	12588.6	16283.2	17220.5	7612.24	7707.09	9415.67	7700.15	63263.5	65577.8	34953.5	12524.3	24509	9189.36	247047	40794.5	12031.9	111731	23732.7	18272.6	70577.2	13287.5	40011.1	16131.5	9472.54	9540.75	8431.66	111731	19652.7	55015	23085.2	11587.2	25936.2	18457.2	9711.8	12476.2	10662.9
0	1364.21	3012.71	2218.5	3088.8	1817.74	21530.9	12829.2	7788.07	5215.06	19355.2	19524.1	6537.26	38922.2	12850.7	15852.2	18243.6	5918.98	8013.81	8872.5	6988.68	86915.1	92216.3	50449.5	13975.1	31260.8	8389.44	387505	55553.9	21215.2	152483	30430.7	21122.6	91916.7	15555.3	58485.7	20242.8	10218.4	11722	9665.68	152483	27902.3	84770	27142.5	12242.2	30779.8	21599.5	9070.67	13928.4	10401.6
0	2798.44	5709.32	4521.74	6306.66	3812.94	40146.1	23409	15145.8	10386.8	37026.7	35427.3	12860.8	69886.2	24940.3	30974.7	35318	11541.8	14768	17504.5	13088.2	160344	182008	93670.8	27308.4	61489.7	16552	737204	106171	39050	298144	60099.6	41195.5	183193	30745.4	115984	41635.6	20407.3	22562.2	18843.1	298144	53937.4	171554	52942.2	24408.1	61952	44632.2	18665.9	28701.8	21481.8
0	3493.19	4229.85	3961.78	5156.87	5307.88	13790.6	12459.2	9802.25	10695.5	15889.9	16452.1	9351.79	53065.3	17520.2	11716.9	14417.3	8326.95	9311.99	12262.6	9402.04	75279.4	115016	29355.9	12109.3	23001.8	10593.8	233995	37237.4	14495.2	44796.6	20231	14202.2	66190.6	13398.8	43039.7	29215.6	11091.3	10276.5	9877.83	44796.6	17444	62775.8	18231.1	13599.1	14627.8	20869.2	10201.8	14495.8	12357.5
0	6365.8	10344.8	7542.43	14012.9	8693.52	39535.9	33491	21516.8	23627.2	34292.7	39272.7	17791.3	130678	40577.4	23311	30016.1	14219.3	16776.8	24076.5	16238.4	193578	330518	69988.3	23657.3	46487.2	17101.6	667131	102770	28933.6	144363	47158.5	31240.9	200952	29082.5	130666	81334.5	23729.1	20438.8	18998.9	144363	43811	197254	38665.3	30961.8	39133.6	61260.1	23277.4	38815.1	30706.5
0	8753.94	18046.7	10965.3	26155.1	10484.3	79608.7	76747.8	38644.8	41593.1	61965.7	82465.3	29907.6	252517	74854.4	40695.3	49221	21194.9	30210.4	37624.2	24237.8	358122	595581	199715	49727.1	76330.7	25093.9	1.22065e+06	181283	82973.9	253545	80085.5	50044.8	359555	52898.8	233582	143383	49286.2	40591.3	36591.4	253545	81980.1	346224	69224.8	50673.5	61861.7	106453	35017.2	69046.7	54515.4
0	5669.23	8902.77	6794.35	12148.3	7601.71	34275.4	32448.1	19453.4	20727.4	31118.6	37734.6	16575.3	113911	36944.7	22216.4	27102.4	13577.1	17133.8	22696.9	16214.4	172411	287189	87181.7	26949.8	41876.3	16530.3	596836	92202.5	41284.8	124750	42078.7	30442.7	172523	30003.7	115894	74031.1	26898.3	23166.6	20977.2	124750	45250	167795	40935.8	29664.1	35302.2	55665.7	21657.5	38213	30637.3
0	3307.81	5243.76	5013.3	5580.74	4813.38	28683.9	14675.3	12342.1	8761.12	25253.4	26063	10131.8	31789.8	23192.2	17672.8	25109.8	6615.16	11570.3	16438.1	7818.18	81778.8	153693	36592.2	16492.9	42224	10674.5	366158	63262	20233.6	10947.2	42363.4	11900.8	17580.8	17211	74762.6	39547.6	11525.4	10705.6	9806.93	10947.2	21072.9	123328	14749.6	21063	10917.9	14289.2	12143.6	29157.2	18978.3
0	3780.7	5413.94	5081.78	5364.73	5475.47	21893	11728.9	10368.4	7991.74	18564.7	17345.9	8452.98	21005.2	16086.9	12004.9	16886.1	5937.28	9416.29	11752	6768.65	45918	83972.8	21425	10987.2	25088.1	8568.61	185466	31927.1	11876.2	7509.49	24249.7	8759.2	11189.8	10732.7	33709.1	18934.3	7893.56	7624.4	7289.86	7509.49	12469.6	47771.1	9228.57	11353.5	7879.13	8972.4	8178.71	12937.6	9724.89
0	3020.59	6521.44	5046.54	5617.89	3450.03	35424.1	24978.6	12876.2	8575.44	26596	36049.7	9081.62	34450.3	23037.5	14335.8	23561	5723.82	16089.7	14717.9	7285.57	84419.8	139687	69823.2	18319.4	39952.3	10094.4	365396	58810.5	38860.6	8304.92	37014.4	8877.21	15617.6	15374	60251.2	27411.8	14150	13599.9	11846.4	8304.92	16327.1	92198.7	11208.3	15304.5	8427.47	9557.29	8250.2	19138.7	11466.4
0	2867.72	4395.11	3782.09	4410.81	3407.89	20420.7	13178.6	9588.57	6510.18	17878.1	21003.4	7889.5	24367.7	16277.3	12006.5	19662.6	5660.05	11080	13608.2	6525.23	70072.2	122265	44970.8	16199.2	39357.8	9874.83	375849	61695.9	27087.7	11315.3	41452.3	11665.1	17924.5	18024.2	76477	37502.1	14895	13713.8	12788.9	11315.3	21395.3	131779	14224.9	21501.7	11202.6	13839	11872.8	28819.9	17709.3
0	5359.54	6037.23	5932.09	6390.49	7303.4	14186.8	11407.8	11176.3	9557.34	16026.5	16928.8	9357.7	25356.8	16691.2	11701.2	15330.9	8225.01	10947.4	12626.6	9434.84	48097.7	94711	29662.1	15619.6	25501.5	10673.7	211975	55563.2	19784.7	13431	30453.6	16435.7	16015.3	17909.1	60221.4	38120.5	18177.3	15117.4	14592.8	13431	20631	81894.3	20032	29183.8	15624	17358.6	17136.6	29922.5	23654.6
0	14294.9	16229.1	15122.8	16722.7	17329.9	46061	34406.2	32673.4	27466.5	55820.3	57643.1	25421	95317.5	54866.6	35616.4	50384.4	19295.2	29804.5	35207.8	22601.7	168287	317157	98279.3	43603.6	79397.2	25643.1	615261	163113	51158.7	30458.2	82674.5	35620.7	37539.9	42145.5	163027	96286	42578.4	34661.5	33066.9	30458.2	46923.4	200671	43786.1	67317	32321.6	37012.8	36047.3	67609.4	51298
0	2447.25	3103.21	3053.41	3263.2	3010.83	9721.29	8212.64	6842.98	5645.05	11706.2	14137.6	5390.21	20494.8	11988	7313.05	10505.9	4097.03	6500.05	6982.02	4735.99	34410.1	67027.1	24729.2	9646.59	14644.6	5190.85	127569	30239.2	11930.7	6220.73	14946.1	7397.15	6935.28	8369.74	27714.8	17695.2	9814.12	8172.15	8102.16	6220.73	8961.62	36142.6	8434.13	12823.8	6499.23	6837.32	6849.07	12202	9779.71
0	2401.5	3479.03	2997.59	3848.08	3126.44	13170.5	11474.4	8488.41	7262.52	16788.3	20829.7	6751.98	32331.1	16512.2	9867.13	14246.5	4603.1	9819.9	9984.71	6073.61	59716.1	106085	44286.7	13922.3	24527.9	7029.36	232735	54025.8	20958.4	8709.46	24896.3	9739.82	10974.5	13150.2	53292.2	31628.9	16239.1	12378.9	11419.9	8709.46	14580	71724.8	14379.7	21780.4	9156.78	10537.7	10524.2	21871.3	15546.8
0	9175.63	13023.5	10474	11288.6	11903.3	41765.9	28415	23296.6	18448.5	52091.1	46780.3	18674.7	52537.1	33337.7	34496.5	40854.3	12774.7	18558.4	24029.8	15172.3	97726.7	249343	78202.8	25306	63519.2	15923.6	542050	88569	25481.3	27971.4	61629.4	20220.7	34210.8	21019	79425.7	63038.6	16064.6	18033.9	15741.1	27971.4	27175.9	124393	24349.4	21668.3	18493.1	19680.9	15598.5	20572.9	23512.7
0	7617.69	10824.6	8647.66	9216.82	9998.99	31262.1	21739.6	17838.8	14004.5	39637.3	36670.3	15222.7	44003.4	24994.9	28249.2	31408.2	11098.5	15020	19025.1	13236.3	82709.6	182035	69637.4	22317.9	50703.1	14412.2	441903	83128.5	22711.8	28425.1	49145.9	19456.8	33411.1	19467.9	75056	55959.2	15456.6	16086.4	14637.8	28425.1	26335.8	120077	24465.6	21713.7	18966.7	19393.2	14877.2	20586.6	21974.8
0	8019.5	11496.9	11514.3	19678.2	11136.6	60709.6	42607	53263.6	34644.9	65435	82763.7	38880.4	161368	115391	80149	57003.3	16044.9	32207.2	57758.1	26980.8	332905	1.05664e+06	201641	83900.7	102824	25776.2	1.29885e+06	253390	122506	24042.2	82388.4	29481.1	37219.6	46122.5	411782	314840	34045.8	32203.7	29602.8	24042.2	75864.8	311717	48957.5	52961.3	29571.3	31595.2	32010.9	80851.7	93480.5
0	4749.75	6004.79	5864.61	9211.96	6407.54	26334.8	18918.3	22309.4	15366.8	28669.5	35158	16633.2	69174.2	48528.8	32643.4	27770.1	8409.26	14698.9	26138.9	12523.8	153880	492936	93578.9	36432.3	56113.8	12372.7	668309	128214	57592.5	18836.5	44175.7	16552	24235	24066.5	222918	161813	17744.4	16034.9	14771.4	18836.5	40974.2	180843	26704.9	28196.8	18002.7	19520.1	18631.4	47463.8	54259.3
0	4338.04	6999.3	4932.11	7634.41	5327.43	26304.9	15429.3	11560.6	13540.9	25977.2	17440.1	10728.4	51251.6	23285.4	24979	22347	10128.3	9552.85	12624.4	8672.41	87225.5	62588.2	52760.1	14379.7	32349.6	11507.3	259007	54013.7	13843.1	150006	29554.1	26717.9	87899.3	16425.1	49068	17351.6	12650.6	12674.1	11226.3	150006	25664.7	59415.1	20058.9	16716.8	33706	22329.2	14112.3	19132.9	16068.7
0	4278.73	6422.86	4867.28	7353.56	5327.74	22028.8	13919.3	10757.9	12168.3	22413.6	15771.6	10160.8	46559.3	21342.3	22950.3	20092.8	10043.8	9749.11	12412.7	9331.66	85834.9	62816.9	52323.8	15699.5	33718.5	13107.7	292673	60566.8	17684.7	177114	34859.8	34101.3	100366	20042.4	62320.5	22184.2	15938.5	16639.9	15012.4	177114	34069.1	83592.3	26517.6	21230.8	43671.3	29522.4	18472.7	26361.7	20128.2
0	997.811	2169.7	1321.39	2601.59	1238.82	11372.8	7222.78	4565.47	5290.63	12765.2	9550.31	4361.55	27628.9	10903.3	11614.4	11367.3	3883.99	4527.97	5927.22	3832.78	54768	38639.7	31776.7	7227.23	18479.4	4841.74	186215	31913.7	7709.34	76449.7	15902	12288	43949.1	7694.95	30392.8	8967.34	5334.73	5817.25	4926.39	76449.7	13592.2	39903.6	9169.74	7168.88	16369.7	10676.9	5814.68	9156.97	6633.35
0	2408.28	5507.26	3153.85	6231.09	2552.82	27185.1	17482.8	10666.1	12571	26130.7	21101.3	9131.67	61770.5	24546	25299.7	21888.6	8240.56	9203.32	11436.7	7100.87	111357	79231.6	67026.3	15202	34541.1	10164.9	371335	67514.5	19248.9	179619	31163.4	27798.3	99689.7	17357.3	63979.5	19003.5	12051.7	13309.4	11558.4	179619	31095.8	83684.6	20734.8	15701.8	36361.8	22887.4	12892.3	19566.4	14613.4
0	8432.39	12588.9	14763.9	24521.8	15124.3	86023	49250.8	75620.4	55861.3	83036	106375	43060.2	112941	190596	33089.4	75021.7	16402.6	30708.1	61498.6	23455.8	330732	858673	59224	54487	115865	22767.4	1.1845e+06	127169	85618.9	21459.5	89846.5	22492.7	31223.7	24419.1	149481	196984	24306.5	26417.7	24011.9	21459.5	34208.4	324207	32005.8	36579.7	20885.5	23867.5	19292.9	44351.9	55889.1
0	6959.91	8050.49	9149.59	11442.1	13540	24752	20774.5	31825.5	26919.6	29915.5	42579.4	21315	37111.4	86321.7	19984.3	25136.6	12517.6	16813.1	27929.9	15592.6	104007	334583	27989.3	27471	36622.9	14876.5	295515	38993.8	38991.2	13392.2	31118.7	16314.1	15036.9	14354.6	47038.7	77098.6	16659.9	16062.7	15494.3	13392.2	17849.4	79477.8	18238.8	19120	13861.6	13968.2	14031.2	20783	26156.5
0	4208.89	4671.73	5497.9	7307.1	7517.91	13414.8	12851.3	15056.8	11736	11546.7	18169.8	10050.1	16689.1	30305.5	10059.7	11761.5	7633.2	9958.34	12773.2	9240.97	46566.6	128434	38388.9	16888.6	17540.8	9650.19	146150	24063.2	26664.3	9672.23	18663.5	11415.4	10069.4	9958.36	29568.7	41570.6	17210.1	12637.8	13218	9672.23	12318.9	50605.8	12783.7	13957.1	9894.55	9738.22	10145.7	16129.6	20465.9
0	8087.36	8854.9	11315	16600.4	14682	31563.3	28798.1	37276.4	26809.5	29194.6	48378.7	22720.2	39746	79125.1	21750.1	28528.2	14621.2	19489	28856	18238.5	114105	334004	69238.3	34458.1	44542.7	18611.7	341230	49436.6	52285.2	18507.7	37314.9	21070.5	19402.2	18371.7	60269.4	91752.4	29652.1	22826.2	23316.8	18507.7	22850.5	102964	23872	24936.4	17586.9	17343.3	17362.5	29674	39091.2
0	6774.05	10270.6	7537.4	9878.12	7030.12	27667.1	23957.9	18211.2	17692.6	31226.5	36039.7	13699	81318.4	32900.6	13288.9	21957.2	9148.8	13732.2	16224.4	10063.6	121541	174326	48230.1	17082.7	33949.3	12673.5	394120	54318.4	22272.1	19470	29029.6	13556.8	23776.5	14264.2	73406	46711.6	11794	12196.5	11263	19470	20359.9	90556.9	15602.2	15023.9	15232.8	17856.2	11069	18356.4	18047.9
0	11657.6	18525.9	13244.3	17499.6	10660.6	55957	48892	34725.6	33497.2	65542.6	79977.5	26743.1	187357	74981.5	26412.9	51434.6	16479	28527	35965	18770.1	342106	496973	135214	39799	92791.2	26577.2	1.23299e+06	178232	60918.6	63502.4	86236.7	29220.6	76305.6	33138.2	276604	156586	25533.3	27443.4	23633.8	63502.4	58447.2	352955	35881.9	38243.3	42990.1	55205.3	23214.7	56534.7	54864.6
0	3554.3	6548.14	4236.06	5829.69	3340.32	19500.6	19833.6	12244.2	11695.2	24091	32263.7	9685.68	68728.1	26867.1	10779.2	18270.8	6039.62	12572	13353.8	7528.54	120307	170255	67370.3	17310.1	34262.6	10415.1	439574	58644.5	31929.6	20287.3	30214.8	13831.7	24523.3	14144.6	83000.1	51328.7	15174.7	14048.6	12689.8	20287.3	21715.1	106993	15599.5	15409.8	15936.3	18162	9770.41	18931.6	19440.4
0	2257.86	3839	2819.79	4087.08	2784.93	11704.2	14356.3	8867.68	8559.75	15343.4	22960.1	7075.04	47582.4	19769.5	8550.91	11681	4995.7	9051.46	8914.13	5654.96	87806.5	123886	54134.7	13344	18460.5	8042.8	315084	44264.4	22952	12626.8	16883.6	8173.47	15965.1	9446.35	59638.2	32668.5	11117.3	8945.23	8413.22	12626.8	13822.1	66516.8	8821.28	9606.74	9722.67	11232.2	6002.56	12574	10877.6
0	5169.28	8156.5	6406.23	8763.17	6859.4	44372.6	19189.7	16299.9	15441.2	29278.1	28633.6	18680.9	81010.4	28530	20637.2	30201.9	14735.3	15938	25469.9	14779.4	147198	176667	45446.5	24929.9	64885.1	21986.1	794816	98323.1	30609	405618	52346.7	56547.8	233178	46193	121211	46947.1	24434.8	23148.1	19881.7	405618	57126.8	179708	57183.9	29447.4	66730.4	55961.3	22230.8	35064.7	25427.4
0	4669.52	6814.64	5549.46	7640.84	6130.95	36366.6	15197.9	13686.8	13342.7	26277.5	22175.9	15759.5	61056.6	23834.5	17388.7	26648.2	11659.9	13133.6	21021.8	11675	101741	133442	32794.4	19888.4	53616.6	16945.3	519008	64466.9	24099.6	240495	42037	41995.7	149716	32606.4	78987.7	36247	18593.2	19688.3	17043.1	240495	41769.8	118238	41618.1	23622.1	45051.3	39439.3	18721.1	26572.9	20748.6
0	1795.74	3898.41	2400.58	4311.7	1956.78	29342.1	13964.8	8563.59	7696.95	16519.4	17963	9006.65	46305.7	14170.9	9261.92	13295.8	5541.85	7650.62	11109.8	5658.97	76931.1	89305.1	31286.7	12051	27423.8	7867.95	444280	47268.8	22882.7	193839	22194.8	24889.5	103028	21028.8	61174.2	21884.6	10633.6	11362.4	9293.67	193839	31861.8	91340.6	27359.2	12087	29376.8	24070.2	9032.41	14546.2	10038.6
0	1567.06	4073.69	2621.82	4528.57	2402.99	25823.7	16783.3	8887.99	7915.09	15214	20772.1	9579.6	48323.1	15552.4	11339.4	14312.2	6720.46	9870.57	13313.5	8376.12	86619.7	97113.1	41450.6	16500.1	30895.5	10927.3	478266	58280.7	37480.4	194591	27049.6	31345.2	110083	26426.1	75659.1	25907.5	15805	17752.9	14426.3	194591	43922.4	100931	32371.9	16992.4	33148	25970.3	11726	18148.5	11686.7
0	8349.1	14004.8	9654.48	12631.6	9271.5	48152.4	26126.6	22473.4	24591.2	56518.2	40177.8	18174.1	79632.5	46605.6	43492.1	39638.9	17521.3	17083.1	23048.4	18630.2	136413	285539	91247.5	31430.3	58367.6	20056.9	514378	90670.5	28452.8	159189	47108.5	36543.9	245855	30507	94372.7	65962.4	19659.3	18865.8	16931.4	159189	46352.8	119028	49084.7	23921.8	59454.7	71627.3	22548.1	30259.8	31295.6
0	8690.19	14777.7	9451.54	12095.7	8641.12	47725.4	25514.8	20711.1	22605.2	52290.9	36315.7	16051.3	78159.7	39336.4	40191.8	34276.4	15038.2	14767	19341.2	15623.7	121906	235545	87540.4	26265.8	48207.2	17025.2	435762	80928.7	22442.5	131143	37689.8	28872.6	201917	25228.9	78783.6	48471.9	15303.3	14557.4	13094.1	131143	36522.2	90222.5	38769.6	18555	47639.4	53306.8	17049.3	22307.7	22399.4
0	2341.42	3646.61	2693.69	3249.2	3221.56	8880.63	7660.96	5541.8	5631.47	11106.6	11841.7	4785.08	20893.9	9693.83	10084.2	8581.96	5174.99	5777.53	5939.59	5759.55	36764.7	57240.1	35849.1	9423.51	14142.3	5825.36	149073	28859.2	12944.6	47550.8	12679.4	13052.3	63136.7	11230.4	32778.5	17124.5	8477.84	8337.21	7184.25	47550.8	17785.5	37515.1	17307.6	9345.43	19707.3	20219.8	8426.66	10889.7	9443.83
0	10623.2	12324.4	8883.82	10506.5	8575.47	28949.4	18745	15341.8	15334.5	31428.3	24784.2	12346.1	40363.7	24358	23078.7	22672.1	12072	12879.1	14879.3	12802.3	68480.6	147365	62905.7	21518.2	35657.1	15030.9	293392	58645.1	27362.8	109999	35387.4	33794.4	163752	28149.8	72359.7	54046.4	21589.7	21831.5	19607.8	109999	42506.6	97698.4	44083.6	24596.6	50564.5	64481.7	23555.2	29557.6	30984.7
[truncated: 10 more columns]

## Sheet: Table S6
Table S6. Relative areas of neutral N-glycan dataset.
y	H3N2	H3N2F1	H4N2	H3N3	H4N2F1	H5N2	H3N3F1	H4N3	H3N4	H6N2	H4N3F1	H5N3	H3N4F1	H4N4	H3N5	H7N2	H5N3F1	H6N3	H4N4F1	H5N4	H3N5F1	H4N5	H8N2	H5N4F1	H4N5F1	H5N5	H9N2	H4N5F2	H5N5F1	H6N5	H4N6F1	H10N2	H5N6	H6N5F1	H5N6F1	H5N6F2	H6N6F1	H7N6	H7N6F1	H6N7F1	H7N6F2	H7N7F1	H8N7F1	H9N8F1	H10N9F1
1	0.00544048	0.00840262	0.00631328	0.006487	0.00820749	0.0137814	0.0104311	0.0105149	0.00892117	0.018125	0.0141862	0.010831	0.0216198	0.0111315	0.00926188	0.016351	0.010864	0.0124609	0.0337564	0.0502361	0.0165871	0.0120346	0.0211877	0.23983	0.0382098	0.013196	0.0211565	0.016239	0.0285358	0.0163627	0.0131983	0.0131459	0.012112	0.0561791	0.0190153	0.013957	0.0172261	0.0138662	0.028103	0.0150827	0.0130283	0.0151299	0.0224469	0.0200051	0.0168415
1	0.0092429	0.0113172	0.0102325	0.0103702	0.0136127	0.0169031	0.0151481	0.0147781	0.01391	0.0192521	0.0168694	0.0147746	0.0206653	0.0150145	0.0137532	0.0185378	0.0150684	0.0160276	0.0280857	0.0382474	0.0185949	0.0156438	0.0213918	0.148866	0.0314491	0.016478	0.0217408	0.0181811	0.0259429	0.0187159	0.0163772	0.0164412	0.0158035	0.0452571	0.0222401	0.0189229	0.0212329	0.0185585	0.0280809	0.0195382	0.0179501	0.0197622	0.023813	0.0246718	0.0225353
1	0.00207207	0.00486385	0.00345226	0.00290003	0.00355188	0.00978521	0.00732317	0.00710515	0.00429849	0.0168373	0.0144328	0.00753914	0.0206038	0.00809254	0.00526071	0.0147978	0.00786204	0.0101057	0.0374846	0.0635286	0.0168884	0.00843932	0.0215428	0.321026	0.0404966	0.0113294	0.0205503	0.0126158	0.0279147	0.0145429	0.00916349	0.00981237	0.0085366	0.0664155	0.014846	0.00912296	0.0134979	0.00864166	0.0316476	0.0104024	0.00793059	0.0109838	0.0225562	0.0169848	0.0122146
1	0.00219912	0.00606361	0.00295024	0.00297196	0.00327444	0.0113965	0.0086776	0.00727061	0.00443452	0.0175269	0.0154553	0.00733277	0.0219446	0.00791303	0.00494442	0.0139992	0.00746083	0.00877578	0.0383461	0.063495	0.0197281	0.00858013	0.0182763	0.324785	0.042758	0.0140006	0.0190867	0.0124885	0.0295829	0.0139582	0.00940246	0.00946853	0.00797092	0.0647081	0.0154209	0.00875073	0.0128557	0.00887086	0.0283562	0.0100889	0.00781515	0.0104218	0.0202721	0.0151192	0.0108011
1	0.00500249	0.0141197	0.00754298	0.00588822	0.00611139	0.0329609	0.012487	0.00925275	0.00685467	0.0348083	0.0174605	0.00802089	0.0359841	0.0119214	0.00798028	0.0314096	0.00953163	0.0103865	0.0387533	0.0814231	0.0286922	0.01139	0.0317436	0.13813	0.0449939	0.0120628	0.0204411	0.0223421	0.0446847	0.0143805	0.0126583	0.0109644	0.00984725	0.036185	0.0188202	0.0148213	0.0224665	0.0112168	0.0257871	0.016561	0.0130285	0.0228122	0.0128812	0.0084368	0.00675281
1	0.00307805	0.0100285	0.0050003	0.00380604	0.00365337	0.0235297	0.00909544	0.0062472	0.00453668	0.0287768	0.0143365	0.00583604	0.033542	0.0100558	0.00635654	0.0280157	0.00753502	0.00864418	0.0396513	0.0816048	0.0290621	0.0104264	0.0325008	0.153286	0.0480167	0.0117733	0.021892	0.0253255	0.0546818	0.0147562	0.0134597	0.011287	0.0099944	0.0440485	0.0202441	0.0152387	0.0256555	0.0104628	0.0317213	0.0168553	0.0144448	0.0270075	0.0135681	0.00657933	0.004382
1	0.00222375	0.00716686	0.00309438	0.00243599	0.00201808	0.024835	0.010861	0.00535915	0.00317351	0.0333457	0.0190101	0.00460101	0.0358047	0.0092244	0.00520805	0.0283998	0.00835575	0.00729485	0.0408049	0.082853	0.0337717	0.00902165	0.030659	0.149462	0.0475297	0.0117236	0.0240521	0.027704	0.0625551	0.0143018	0.0120185	0.0096419	0.008511	0.0503193	0.0193205	0.0144478	0.0281708	0.00844623	0.0338704	0.014893	0.0119887	0.0246836	0.00975135	0.00470763	0.00237853
1	0.00244452	0.00826153	0.0032278	0.00226466	0.00178204	0.0254974	0.0102548	0.004979	0.00272353	0.0299742	0.0165582	0.00401647	0.0319068	0.00759015	0.00422671	0.0246733	0.0066612	0.0061349	0.0383007	0.0844036	0.0302455	0.00797829	0.0275094	0.16109	0.0499995	0.0106805	0.0222195	0.0272574	0.0698072	0.014339	0.0111063	0.00840387	0.00727719	0.0546692	0.0192452	0.0143935	0.0299795	0.008141	0.0364941	0.0154885	0.012351	0.0271866	0.010795	0.00505285	0.00240856
1	0.00376773	0.00508519	0.00419715	0.00485458	0.00451664	0.0163891	0.0107716	0.0100214	0.00770897	0.0171548	0.0193531	0.00785484	0.0218474	0.0163442	0.00592929	0.0171415	0.00753034	0.0104962	0.0540229	0.104081	0.0121615	0.00936407	0.024551	0.249928	0.0313426	0.012022	0.0180303	0.00796272	0.032744	0.0247769	0.00704883	0.00709273	0.00640717	0.0790013	0.0107867	0.00696749	0.0132538	0.0115042	0.0324484	0.00686113	0.00721046	0.00778797	0.0144241	0.0100842	0.00717022
1	0.00280087	0.00465781	0.00338735	0.00441925	0.00307064	0.0128245	0.0104662	0.0115211	0.00621678	0.0176447	0.0207947	0.00675557	0.0183468	0.0222805	0.00563476	0.0183749	0.00658314	0.0106367	0.0480072	0.162856	0.0131393	0.00930811	0.0262032	0.207948	0.0208552	0.0151001	0.0186413	0.00597171	0.0353051	0.0406144	0.00704415	0.00665161	0.00590839	0.0694452	0.00949714	0.00598644	0.0144101	0.0149612	0.0290721	0.00575409	0.00641918	0.00741451	0.0125298	0.00876434	0.00577549
1	0.00369043	0.00521229	0.00399308	0.00503986	0.00357997	0.0133214	0.0110591	0.0116133	0.00612152	0.0176101	0.0207436	0.00696851	0.0158185	0.0195861	0.00568184	0.0179712	0.00769228	0.0101471	0.0410199	0.14621	0.0235608	0.00985492	0.0266172	0.194191	0.018745	0.0172842	0.0181642	0.00640499	0.031673	0.0400034	0.00953671	0.00778229	0.00707126	0.0703086	0.0101644	0.00647796	0.015573	0.0173367	0.0347304	0.0068594	0.007863	0.00928221	0.0171798	0.0124828	0.00777215
1	0.00339587	0.00484205	0.0037555	0.00467698	0.00339807	0.012708	0.0105013	0.0110937	0.00590985	0.0175472	0.0201845	0.00686884	0.0158356	0.0192785	0.00591458	0.0178298	0.00762275	0.00990789	0.041458	0.14695	0.0252528	0.0101419	0.0259583	0.199744	0.0198449	0.0180933	0.0196387	0.00670718	0.0326124	0.0404455	0.0100809	0.00813864	0.00738428	0.0684776	0.0102584	0.00644011	0.0151184	0.0169562	0.0317831	0.00670716	0.00751065	0.00869132	0.0157277	0.0112771	0.00733053
1	0.00482213	0.00980804	0.00646777	0.00594722	0.00607329	0.0298217	0.0170047	0.0110223	0.0087292	0.0270812	0.0219517	0.00955204	0.0342832	0.0151075	0.0118963	0.0238962	0.00947061	0.0110436	0.0567178	0.0652684	0.0218948	0.0113322	0.0260031	0.208762	0.0330912	0.0123665	0.0227468	0.0130155	0.0365782	0.0162731	0.0111795	0.0104411	0.0100507	0.0466822	0.0129203	0.0102446	0.0143759	0.0113716	0.0187086	0.00787345	0.00856058	0.00890078	0.0131881	0.0152472	0.0122272
1	0.00382762	0.00771573	0.00466288	0.00451766	0.00464617	0.0269207	0.0143184	0.00916239	0.00700753	0.0269786	0.0200324	0.00803971	0.0336315	0.0136309	0.00981486	0.0239094	0.0077859	0.00977814	0.0594025	0.0668948	0.020555	0.00940144	0.0269359	0.239637	0.0348277	0.0105938	0.0229247	0.0116031	0.0402287	0.0148519	0.00968113	0.00913725	0.00826772	0.0550541	0.0117681	0.0089913	0.0138993	0.0104911	0.0212871	0.00704145	0.00805524	0.00857214	0.0130405	0.0115963	0.00888082
1	0.00152371	0.00379317	0.00239991	0.00195223	0.00208834	0.0102132	0.00898633	0.00439864	0.00335064	0.0103269	0.0129873	0.00519322	0.0161543	0.00755601	0.00562175	0.0112353	0.00702606	0.00744402	0.0391259	0.0429406	0.02401	0.0105311	0.0169254	0.211002	0.035444	0.0276769	0.0211218	0.0180476	0.0556116	0.0207367	0.0163169	0.0166758	0.015526	0.077543	0.0198228	0.0158024	0.0239603	0.0159647	0.0375353	0.0111643	0.0132584	0.0149858	0.0277723	0.026788	0.0214597
1	0.00136211	0.00387971	0.00211137	0.0019198	0.00176019	0.01224	0.0107398	0.00391136	0.00317926	0.0143754	0.0164854	0.00396099	0.0256531	0.00785806	0.00547632	0.0148719	0.00754212	0.00576867	0.0576748	0.049375	0.0264573	0.00753037	0.0197869	0.29186	0.039561	0.0188068	0.0209117	0.0128708	0.0556841	0.0149781	0.00930445	0.0105888	0.00895757	0.0827996	0.0124563	0.00951809	0.0172055	0.00875076	0.029833	0.00643179	0.00812504	0.0090129	0.0130712	0.00907336	0.00627964
1	0.0112559	0.00811536	0.00697436	0.00796062	0.00466009	0.0363655	0.0110078	0.013308	0.0156509	0.0304613	0.0160737	0.00893784	0.0169491	0.0199565	0.0301421	0.0302403	0.00717966	0.0113712	0.0319215	0.0684703	0.0136218	0.0418168	0.0442477	0.148718	0.0184792	0.0520613	0.0341798	0.0111325	0.0200508	0.0210797	0.00806127	0.0191686	0.0224018	0.0390872	0.0100756	0.00967564	0.0104905	0.0142142	0.0173947	0.00691803	0.00934738	0.00707001	0.0118448	0.0119024	0.00995775
1	0.0110481	0.00760712	0.00622844	0.00734351	0.0036109	0.0358314	0.00947216	0.0119188	0.0141078	0.0302945	0.0146444	0.00823971	0.0163117	0.018456	0.0278747	0.030614	0.00614455	0.0104746	0.0311434	0.0683746	0.0130171	0.0384274	0.0480048	0.160737	0.018227	0.0499411	0.0352923	0.0111737	0.0210624	0.0213775	0.00709188	0.0182453	0.0216139	0.0437528	0.00911733	0.00928095	0.0106225	0.0149808	0.0202447	0.00648669	0.0101267	0.00687575	0.0130625	0.0124029	0.00909497
1	0.0115429	0.00785447	0.00737726	0.00658672	0.00459484	0.0297015	0.0140873	0.0114855	0.0122822	0.0242335	0.0174064	0.00835136	0.013728	0.016296	0.0211093	0.0242133	0.0103654	0.0110773	0.0269507	0.0556229	0.0209702	0.0326616	0.0385827	0.132681	0.0201128	0.0518346	0.0326165	0.0145585	0.0256071	0.0248154	0.0130382	0.0213947	0.0239168	0.0461565	0.0149068	0.0135392	0.015724	0.0189954	0.0245083	0.0109157	0.0130513	0.010483	0.0161543	0.0157194	0.0121895
1	0.00957282	0.00693599	0.00652921	0.00614274	0.0037911	0.0282883	0.0130593	0.0101127	0.0129945	0.0256739	0.0176146	0.00829397	0.0165321	0.0172341	0.024864	0.0274644	0.0100392	0.0121182	0.0321833	0.0596578	0.0219472	0.0354024	0.0456455	0.152146	0.0204229	0.0498748	0.0340889	0.0128116	0.0239531	0.0223766	0.0105374	0.0193185	0.0221441	0.0450151	0.0122047	0.010923	0.012815	0.0158847	0.0217665	0.00864749	0.0112085	0.00838255	0.0132905	0.0116577	0.00843272
1	0.00488045	0.00646642	0.00595624	0.00732466	0.00415001	0.020082	0.0119471	0.018018	0.0103251	0.0212891	0.0243055	0.00884483	0.017334	0.0324141	0.00930574	0.0204486	0.00744602	0.0126209	0.0456665	0.135624	0.0154081	0.0149053	0.0274553	0.149317	0.0270499	0.0252753	0.0222374	0.00678305	0.0482271	0.038997	0.00785031	0.0081637	0.00783548	0.0558146	0.0136357	0.00704269	0.0214653	0.014876	0.0238492	0.00840661	0.00477299	0.010309	0.00730596	0.00472265	0.00384524
1	0.00260435	0.00394525	0.00357696	0.00483275	0.00238737	0.0148474	0.00991159	0.0137502	0.00748187	0.0180066	0.0222332	0.00722167	0.0148548	0.02787	0.00762848	0.0186086	0.00732972	0.0106644	0.0434959	0.129851	0.0246876	0.0141322	0.0256574	0.148512	0.0259431	0.026699	0.0216213	0.00598723	0.0479034	0.0409207	0.00986397	0.00872224	0.00878686	0.0591238	0.0129273	0.0063697	0.0266468	0.0186688	0.0329356	0.00902836	0.00409292	0.0168005	0.0161047	0.0105033	0.00625957
1	0.00301004	0.00427508	0.00391581	0.00509134	0.00285386	0.0151155	0.0100254	0.0138187	0.00774926	0.0182608	0.0220004	0.00762658	0.0148847	0.0275307	0.00803042	0.0188267	0.00769287	0.0110735	0.0424961	0.126275	0.0236624	0.0143125	0.0263851	0.145609	0.0259564	0.0264198	0.0218182	0.00664873	0.0473752	0.0403938	0.0100768	0.00915973	0.00915452	0.0585838	0.0135688	0.00703957	0.0267797	0.0188559	0.032864	0.00950313	0.00470183	0.0170002	0.0162101	0.0107758	0.00659189
1	0.00271245	0.00478558	0.003396	0.00427826	0.00361993	0.019484	0.0115429	0.00885702	0.00693801	0.0158116	0.0203833	0.00678796	0.0238592	0.0148882	0.00464883	0.0157904	0.00664156	0.00898871	0.058457	0.0985846	0.0106471	0.00833061	0.0199949	0.291532	0.0327675	0.0102434	0.0156249	0.00694241	0.0330958	0.0205115	0.00570378	0.00564928	0.00517148	0.0765908	0.00941033	0.00607654	0.011464	0.00924917	0.0290287	0.00576118	0.00618736	0.0066924	0.0138136	0.0110563	0.00799908
1	0.00184324	0.00327957	0.0024092	0.00306487	0.00239119	0.0149763	0.0087793	0.00716379	0.00572124	0.0155665	0.0182995	0.00610712	0.0230778	0.0135846	0.0037846	0.0164029	0.00584236	0.0087371	0.0611624	0.0982998	0.010681	0.00756798	0.0249423	0.291201	0.0346909	0.00967024	0.0172626	0.00615976	0.0340192	0.021741	0.00493623	0.00500743	0.00441726	0.0895293	0.00908555	0.00509734	0.0116964	0.00919824	0.0346294	0.00532072	0.00590208	0.00658258	0.0145672	0.00944142	0.00615913
1	0.00308686	0.00499361	0.00385154	0.00427678	0.00352843	0.016701	0.0134881	0.00837573	0.00663382	0.0142856	0.0216565	0.00678969	0.0228109	0.0137087	0.00504828	0.0138041	0.00844769	0.00883261	0.0549512	0.0838625	0.0239338	0.010364	0.0180844	0.280026	0.0324057	0.0208255	0.0154064	0.00833519	0.0295933	0.0186944	0.0084554	0.00774723	0.0073806	0.0695694	0.0107114	0.00705878	0.0119632	0.00953677	0.0289331	0.00703317	0.00708093	0.00776277	0.0163014	0.0137176	0.00994572
1	0.00332092	0.0051577	0.00446118	0.0045371	0.00466746	0.0172876	0.0116628	0.00883276	0.00702203	0.0172847	0.0206012	0.00778246	0.0229128	0.0135107	0.00567423	0.0172871	0.00864054	0.0099745	0.052591	0.0752997	0.0181797	0.00986897	0.0245123	0.27877	0.0320908	0.014608	0.0193062	0.00877951	0.0295324	0.0196667	0.00850781	0.00786225	0.00712075	0.0747302	0.0116008	0.00759182	0.0124065	0.0102323	0.0302562	0.00735754	0.00788722	0.00791093	0.0141239	0.0108382	0.00775076
1	0.00572597	0.00705142	0.00623332	0.00636435	0.00811658	0.0126641	0.0101997	0.00966428	0.00877849	0.0145089	0.0136685	0.00936819	0.0177122	0.0112815	0.00939325	0.0132303	0.0101737	0.0111337	0.0311793	0.0465941	0.0145181	0.0110937	0.0159486	0.239983	0.0261225	0.0137418	0.0159676	0.0139943	0.0392808	0.0215616	0.0118328	0.0110093	0.0107891	0.0795238	0.0166303	0.0138697	0.0205966	0.0157959	0.0375877	0.0133894	0.0134396	0.0170057	0.0238457	0.021323	0.0181075
1	0.00576068	0.00712682	0.00634668	0.00649672	0.00807369	0.0129769	0.0105859	0.00976259	0.00907845	0.0153643	0.0137744	0.0101081	0.0185966	0.0114275	0.00929129	0.0137126	0.010184	0.0110887	0.0328276	0.0479854	0.0147603	0.0111336	0.0164318	0.249405	0.0264336	0.0132984	0.0160585	0.0134876	0.0393085	0.0208603	0.0117144	0.0105427	0.0102209	0.0745503	0.0161514	0.0131626	0.0196206	0.0151247	0.0351616	0.0128041	0.0122777	0.0161593	0.022812	0.0207113	0.0172397
1	0.00135111	0.00242975	0.00185188	0.00186498	0.00206377	0.0074391	0.00591356	0.00428581	0.00332229	0.0118126	0.0135577	0.00493377	0.016205	0.00678843	0.00413304	0.0101484	0.00579153	0.00657875	0.0386035	0.0591451	0.0150206	0.00635145	0.0144652	0.351061	0.0267416	0.0123064	0.0131461	0.00999869	0.0432945	0.0202078	0.00790334	0.0061287	0.00548725	0.101141	0.0108992	0.00726486	0.0167438	0.0100855	0.041498	0.00717616	0.00674698	0.0113421	0.0215372	0.0150558	0.010176
1	0.00463492	0.00528745	0.00492589	0.00509985	0.0054134	0.0139137	0.0116583	0.0142908	0.00842408	0.0198627	0.0239659	0.00893812	0.0191785	0.0266971	0.00733057	0.0198477	0.00827918	0.0130275	0.0464311	0.159603	0.0136358	0.012089	0.0257874	0.213467	0.0234712	0.0180979	0.0164875	0.00739006	0.0325356	0.0424271	0.00766018	0.00760968	0.00707165	0.0549122	0.0100062	0.00720205	0.0117201	0.0131427	0.0168014	0.00619647	0.0052419	0.00615124	0.00588026	0.00440434	0.0038015
1	0.00555591	0.00620954	0.00602853	0.00631731	0.00727204	0.0131149	0.0118829	0.0142243	0.00969828	0.0199448	0.0222593	0.0104324	0.0180553	0.0223735	0.00922624	0.0208097	0.00984875	0.0134024	0.038968	0.124519	0.0154302	0.0140382	0.0279732	0.18202	0.0238111	0.0200875	0.019504	0.0102399	0.0316621	0.0442837	0.0107165	0.0108927	0.010183	0.0586843	0.0139736	0.0104082	0.0156259	0.016793	0.0219532	0.00929585	0.00836035	0.00929491	0.00912209	0.00815646	0.00734694
1	0.00277048	0.00404222	0.0032112	0.00416883	0.0028267	0.0119965	0.00882516	0.0111776	0.00565473	0.016638	0.0192416	0.00656395	0.0145665	0.0212787	0.00525148	0.0178732	0.00673546	0.0108359	0.0407497	0.152139	0.018883	0.0108818	0.0268017	0.22216	0.0224839	0.0203797	0.0171818	0.00670707	0.0335635	0.0507993	0.0088079	0.00777019	0.00698878	0.0668642	0.00963788	0.00627643	0.0142192	0.0177245	0.0262205	0.00568406	0.00491163	0.00746734	0.0107	0.00626398	0.00407471
1	0.0043198	0.00525803	0.00465241	0.00552985	0.00502459	0.0118386	0.0101883	0.0112734	0.00711241	0.0155866	0.0193999	0.00818664	0.0154629	0.0198055	0.00754237	0.017321	0.00899747	0.012377	0.0387328	0.124157	0.0209055	0.0127291	0.0283491	0.200258	0.0239908	0.0212181	0.0183695	0.00976062	0.0329246	0.0445145	0.0113573	0.0104917	0.00976675	0.0624165	0.0134153	0.00997209	0.0167819	0.0188909	0.0269166	0.00856045	0.0075676	0.00999276	0.0126218	0.00887787	0.00658383
1	0.00328909	0.00589507	0.00375411	0.00533768	0.00308197	0.0144455	0.0102611	0.0136453	0.0103016	0.0180959	0.0208272	0.00673113	0.0254522	0.0273344	0.00923801	0.017557	0.00578508	0.0101866	0.0399286	0.144162	0.0189069	0.0137904	0.0232832	0.136759	0.0292563	0.0200844	0.02036	0.00721956	0.0362855	0.0560799	0.0123944	0.00885396	0.00833705	0.0563355	0.0174379	0.0084655	0.0196035	0.0247607	0.0293277	0.01169	0.00673094	0.0113778	0.0129041	0.00903492	0.00541136
1	0.00307949	0.00580868	0.00346632	0.00513716	0.00255822	0.0132844	0.010232	0.013164	0.00996114	0.0168721	0.021214	0.00613308	0.0262358	0.0267933	0.00876074	0.0165725	0.00527841	0.00978193	0.0413673	0.139965	0.0207441	0.0136415	0.0225717	0.138065	0.0325384	0.0198972	0.0202584	0.00684259	0.0399445	0.0566111	0.0131396	0.00793812	0.00771131	0.0574701	0.0184917	0.00819042	0.0200164	0.0232622	0.0289566	0.0115562	0.00617787	0.0111361	0.0130904	0.00974033	0.00634227
1	0.00368741	0.00528736	0.00476	0.00529718	0.00459982	0.01297	0.0103752	0.0122081	0.00988533	0.0194249	0.0207431	0.00857257	0.0237197	0.0235585	0.0106715	0.021003	0.00888087	0.0119248	0.03892	0.120134	0.0282015	0.0161303	0.030307	0.120569	0.0284149	0.0218836	0.0246293	0.00995236	0.0330498	0.0492353	0.0162388	0.0119904	0.0113313	0.051193	0.0191939	0.0109501	0.0201415	0.0250509	0.0286908	0.0132196	0.0098821	0.0124391	0.0138512	0.0102313	0.00660034
1	0.00410809	0.00573418	0.00520562	0.00565097	0.00574036	0.0109613	0.0106941	0.0118179	0.0096577	0.0151022	0.0197431	0.00888359	0.0210436	0.0209561	0.0104134	0.0168834	0.0096448	0.0110693	0.0347647	0.101004	0.0324122	0.0160257	0.0265003	0.106242	0.0290406	0.0234114	0.0211793	0.0106792	0.0352472	0.0491968	0.019801	0.0138091	0.0131106	0.0562216	0.0230736	0.0130591	0.0246346	0.0282321	0.0344349	0.016917	0.012031	0.0162413	0.0173324	0.0130628	0.00902595
1	0.0024078	0.00378107	0.00269006	0.00303141	0.00287771	0.0099713	0.0091463	0.00603258	0.00516144	0.011135	0.0146936	0.00541438	0.0195168	0.0116835	0.00926785	0.0116441	0.00766751	0.00770533	0.0454414	0.083636	0.041356	0.0131807	0.0238791	0.253609	0.040837	0.0233239	0.0208379	0.0115003	0.0527974	0.029908	0.0121831	0.00990264	0.00869711	0.0722832	0.0130395	0.012112	0.0146185	0.0130172	0.0241402	0.00685808	0.00569868	0.00690737	0.00796322	0.00491562	0.00352912
1	0.00349585	0.00511766	0.00330891	0.00432026	0.0034673	0.016723	0.0138293	0.0094918	0.00745816	0.016861	0.0220399	0.0067995	0.0298764	0.0170199	0.0116223	0.0133984	0.0079917	0.00857329	0.0543187	0.107179	0.0461592	0.0136595	0.0193993	0.22534	0.0378711	0.0223564	0.0169389	0.00986498	0.0455484	0.0260299	0.0104822	0.00835806	0.00769087	0.05508	0.0109199	0.010444	0.011541	0.0107532	0.0179207	0.00567415	0.00512239	0.00576496	0.00653473	0.00452905	0.00312481
1	0.00371661	0.00520276	0.00416157	0.00439878	0.0053738	0.0104208	0.00904502	0.00734857	0.00640823	0.0128775	0.0153939	0.00696643	0.0221139	0.0102793	0.00656539	0.0135076	0.00880164	0.00916534	0.0420196	0.0656933	0.0131893	0.00891969	0.0178668	0.257493	0.0229463	0.0117459	0.0162983	0.0107275	0.0376187	0.0314397	0.0093524	0.00963924	0.0090801	0.0897632	0.0134017	0.0108547	0.0166268	0.015665	0.0388761	0.0105147	0.012232	0.0116121	0.0226726	0.018325	0.0136789
1	0.0045135	0.00597468	0.00491692	0.00523553	0.00662033	0.0110276	0.00980457	0.00818598	0.00748953	0.0125663	0.0147236	0.00802974	0.0207495	0.0104156	0.00763989	0.0135951	0.0095159	0.00999307	0.0385981	0.0585082	0.0137789	0.010004	0.0177205	0.231921	0.0232279	0.0129743	0.016893	0.0118731	0.0384347	0.0313922	0.0108997	0.0108667	0.010546	0.0872581	0.0149694	0.0130805	0.0187504	0.0176295	0.0389646	0.0123744	0.0144009	0.0136172	0.0241655	0.0205729	0.0155811
1	0.00137845	0.00307741	0.00205854	0.00231298	0.00243739	0.00888236	0.00800119	0.00514489	0.00388645	0.0133606	0.0177524	0.00519762	0.025387	0.00915584	0.00434499	0.0139645	0.00749136	0.00784094	0.0527535	0.0822844	0.0154844	0.00695203	0.0178262	0.316349	0.0223949	0.0109725	0.0140658	0.00763627	0.0368676	0.0288586	0.00713461	0.0064747	0.00599348	0.0888726	0.00905974	0.00664132	0.0123984	0.0115291	0.0351396	0.00620215	0.00763716	0.00753242	0.0193521	0.0133162	0.00859638
1	0.00150533	0.00317749	0.00207089	0.00245269	0.00253374	0.00863904	0.00777408	0.00520742	0.00405416	0.0128198	0.0181985	0.00559514	0.0248011	0.00878352	0.00439459	0.0136163	0.00781194	0.00791888	0.0501856	0.0785366	0.0166281	0.00725393	0.0173963	0.311006	0.0222898	0.0115812	0.0138578	0.00804626	0.036926	0.0292479	0.00772128	0.00717661	0.00676418	0.0907015	0.00988877	0.00738604	0.0132614	0.0116558	0.0355789	0.0069044	0.00841911	0.00820221	0.0191465	0.0139343	0.00894851
1	0.00406232	0.00542545	0.00495263	0.00417344	0.00538317	0.0166511	0.00822472	0.0075624	0.00560897	0.0118589	0.0144888	0.00754209	0.0173342	0.00795557	0.00633307	0.0125136	0.00839323	0.00981055	0.029856	0.0560365	0.0134122	0.0101252	0.0184565	0.188735	0.0463341	0.0166141	0.0160951	0.0187295	0.10313	0.0261725	0.011262	0.0109663	0.0102979	0.0737831	0.0182093	0.0131502	0.0326851	0.0145829	0.0366076	0.0116198	0.0121857	0.0157108	0.015273	0.0121048	0.00959053
1	0.00254997	0.00396473	0.00341243	0.00268648	0.00284257	0.0152801	0.00657118	0.00558257	0.00335279	0.00980581	0.0135671	0.00527677	0.0168306	0.00619986	0.00399167	0.0105728	0.00560867	0.00760326	0.0316713	0.0583013	0.0123069	0.00806113	0.016869	0.217417	0.0527952	0.0147191	0.0147373	0.0176088	0.12515	0.0258567	0.00860139	0.00796643	0.00722688	0.0832752	0.0157096	0.00972139	0.0345624	0.0109549	0.0393183	0.00861775	0.00940197	0.0139722	0.0134157	0.00944745	0.00661533
1	0.00164582	0.00363582	0.00297551	0.00204148	0.0019654	0.0171	0.007415	0.00528336	0.00265327	0.00994251	0.0143047	0.00470091	0.0154402	0.00537238	0.00305578	0.00974332	0.00530961	0.00700527	0.0304402	0.0585613	0.0144203	0.00727802	0.0147213	0.211553	0.0461399	0.015459	0.0135635	0.0166335	0.118385	0.0263191	0.00907817	0.0093374	0.00802733	0.0894306	0.0156136	0.00953255	0.0368296	0.0114579	0.0471847	0.0087591	0.00970261	0.015805	0.0166725	0.0117767	0.00772767
1	0.00109855	0.00251589	0.00188917	0.00149345	0.00150929	0.0122632	0.00608252	0.00389091	0.00204774	0.0081201	0.0137252	0.00403351	0.0163191	0.0049858	0.00279375	0.00905295	0.00516958	0.00665949	0.0335899	0.0605428	0.0155595	0.00732992	0.0147662	0.243047	0.0543083	0.016539	0.0132082	0.0168057	0.128634	0.0242357	0.00853442	0.00870757	0.00765124	0.0865582	0.0143092	0.00796443	0.0334866	0.0089599	0.0395875	0.00686577	0.0076271	0.0127867	0.012386	0.00752605	0.00483343
1	0.00423357	0.00465417	0.00493677	0.00547943	0.0054568	0.0175188	0.0104068	0.0118576	0.00857097	0.0151599	0.0175576	0.00885352	0.0179419	0.0199906	0.00814796	0.0131177	0.00754338	0.0111979	0.0496904	0.110386	0.014532	0.011469	0.018217	0.24846	0.0257057	0.0161666	0.0154973	0.00885158	0.0332729	0.0328781	0.00866301	0.00795631	0.00769722	0.0664894	0.0116806	0.00928423	0.0142373	0.0156786	0.024894	0.00803169	0.00690369	0.00886531	0.0130891	0.0106119	0.00816539
1	0.00503783	0.00558504	0.00565195	0.00581739	0.00635175	0.0160479	0.0102596	0.0112087	0.00883303	0.0148372	0.0164868	0.00977035	0.017408	0.0183208	0.00952505	0.0142396	0.00888279	0.0120654	0.045546	0.0935711	0.016079	0.012614	0.0214765	0.230927	0.0265671	0.0172657	0.0172463	0.0115297	0.0329438	0.0316063	0.0108451	0.0102712	0.0100475	0.0633479	0.014627	0.0118011	0.0159388	0.0172088	0.0265983	0.0102071	0.00905919	0.0105932	0.0141795	0.0120208	0.00955236
1	0.00148675	0.00248471	0.00233076	0.00307446	0.00177683	0.0110652	0.0101763	0.00735887	0.00462753	0.00868126	0.0178164	0.0047827	0.0152	0.0137666	0.0047695	0.00698255	0.00550814	0.00667831	0.0515767	0.0939377	0.0294521	0.0102399	0.0122514	0.316514	0.0286935	0.0254311	0.0110008	0.00652062	0.0378217	0.0319299	0.0108036	0.00669299	0.00620545	0.0830814	0.00918792	0.00610659	0.0133685	0.0132992	0.0298927	0.00494851	0.00374485	0.00658986	0.0110074	0.00673816	0.00439622
1	0.00288237	0.00289318	0.00312027	0.0039248	0.00371045	0.011846	0.00993033	0.00880163	0.00606321	0.0107567	0.0157484	0.00701146	0.0143377	0.0164802	0.00709876	0.010471	0.00708929	0.00907053	0.0450188	0.0996684	0.0272118	0.0125756	0.0150301	0.254897	0.0278928	0.0227849	0.0143672	0.0100928	0.035551	0.0350242	0.0126481	0.00970976	0.00993808	0.0707711	0.0125943	0.00988582	0.0157876	0.017242	0.0293855	0.00805318	0.00603559	0.00936022	0.015834	0.0124123	0.00899222
1	0.00277409	0.00321591	0.0037013	0.00640847	0.00344443	0.0145536	0.0118346	0.0154307	0.00994969	0.0138031	0.0210505	0.00914551	0.0226882	0.0401492	0.00685377	0.0129806	0.0068793	0.0118696	0.0711308	0.162485	0.0128015	0.0132632	0.0210954	0.207946	0.0254283	0.0225327	0.0145096	0.00614941	0.0395245	0.0351065	0.00565377	0.00607647	0.00570246	0.0500392	0.00795048	0.00539143	0.011143	0.0111354	0.0166982	0.00464203	0.0039914	0.0059517	0.00792672	0.00534079	0.00365024
1	0.00472463	0.00499254	0.00564181	0.00862471	0.00607323	0.0158153	0.014422	0.0178637	0.0124215	0.014142	0.0227756	0.0114241	0.022506	0.0392961	0.00906657	0.0131968	0.00996304	0.0147261	0.0652263	0.151082	0.0138633	0.0149134	0.0181191	0.191152	0.0247713	0.0224475	0.0138763	0.00819883	0.0355321	0.0322237	0.00753923	0.00802374	0.00772303	0.0435592	0.00985672	0.00725232	0.0118173	0.0118029	0.0155247	0.00626515	0.00535524	0.0069342	0.00805412	0.00632525	0.00488591
1	0.00173347	0.00200606	0.00293359	0.00577943	0.00189251	0.0129117	0.0132571	0.0148772	0.00915769	0.012766	0.0228811	0.00837123	0.0222345	0.0390675	0.0058043	0.0116194	0.00747391	0.0107936	0.0724305	0.163142	0.0333931	0.0139023	0.019821	0.22313	0.023921	0.0263902	0.0129034	0.00510838	0.0363455	0.032777	0.00793052	0.0061814	0.00578105	0.0477352	0.0065363	0.00364143	0.00915286	0.00884363	0.0140038	0.0032257	0.00229033	0.00413275	0.00584361	0.00360524	0.00227242
1	0.00107153	0.00154077	0.00190387	0.00390138	0.00158893	0.00867705	0.0117548	0.0108369	0.00719233	0.00968446	0.023093	0.00621855	0.0215655	0.0314714	0.00531161	0.00903171	0.00775604	0.00893651	0.078264	0.140779	0.0444846	0.0150375	0.0194201	0.25156	0.0270935	0.0301037	0.0112485	0.00510272	0.0415501	0.0285695	0.00946291	0.00720348	0.00671862	0.0514481	0.00644703	0.00334459	0.00927816	0.00746461	0.0142647	0.00303368	0.00239783	0.0040535	0.00497142	0.00293975	0.0022218
1	0.0018768	0.00394861	0.00250672	0.00295539	0.0026162	0.0133581	0.00924691	0.00706105	0.00406854	0.0156975	0.0169551	0.0057441	0.0213369	0.00966151	0.0062878	0.014065	0.00609808	0.00849099	0.0442617	0.0947953	0.0154927	0.00737244	0.021536	0.30876	0.0293921	0.00975294	0.0198993	0.00956016	0.0383564	0.0208431	0.00799037	0.00825027	0.00717272	0.0765647	0.0103486	0.00756152	0.0128386	0.0101802	0.0284319	0.00551924	0.00714177	0.00661474	0.0166892	0.013769	0.00893015
1	0.00180032	0.00358009	0.00227216	0.00261131	0.00241748	0.011541	0.00754971	0.00612765	0.00369131	0.0149188	0.0152055	0.0052932	0.0214137	0.00858604	0.00544453	0.0137257	0.00548182	0.0076459	0.0446225	0.0859588	0.0150723	0.00650196	0.022682	0.32642	0.0300691	0.00877193	0.0202733	0.00901361	0.0400503	0.0196929	0.00690661	0.00764556	0.00663602	0.0868274	0.00965625	0.00711484	0.0130942	0.00967667	0.0326255	0.00516675	0.00768582	0.00644949	0.0156842	0.0100723	0.00632311
1	0.00182928	0.00425962	0.00241474	0.00262339	0.00193932	0.0137554	0.00960359	0.00654856	0.00325633	0.0161687	0.0182117	0.00538462	0.0206336	0.00833823	0.00495734	0.0134638	0.00571217	0.00722512	0.0426772	0.0906247	0.0182651	0.00630852	0.0209069	0.317398	0.0277914	0.010981	0.0187366	0.00924891	0.0375204	0.0208628	0.00748597	0.0077045	0.00655085	0.0845386	0.00969857	0.00721902	0.0127315	0.0100507	0.0313288	0.00507917	0.00737852	0.0061978	0.016468	0.0120591	0.00786164
1	0.00266776	0.00386688	0.00318296	0.0032287	0.00382657	0.00889913	0.00790068	0.00584841	0.00462942	0.0102113	0.0125259	0.00604371	0.012661	0.00768328	0.00609648	0.0110004	0.00758844	0.00827855	0.0300536	0.0636674	0.0202141	0.00865893	0.018665	0.263036	0.027566	0.0190806	0.0204065	0.0140111	0.0419611	0.0252645	0.0136089	0.0131227	0.0126162	0.0849993	0.0163014	0.0135269	0.0188591	0.0160533	0.0373639	0.0105327	0.0122799	0.011474	0.0253639	0.0207765	0.0143964
1	0.0124252	0.0155977	0.0113026	0.0105476	0.0120213	0.0245303	0.0175141	0.014887	0.0126829	0.028746	0.0216859	0.0126644	0.0256049	0.0168575	0.0133419	0.0264714	0.0128379	0.0137491	0.0373932	0.0509525	0.0235736	0.0143464	0.0319153	0.124159	0.0275158	0.0153694	0.0277042	0.0174344	0.0318146	0.0196293	0.015073	0.0140483	0.0134213	0.0435303	0.0188633	0.0179044	0.0199121	0.0182074	0.0232187	0.0140434	0.0159147	0.0145954	0.0169121	0.0162515	0.0128287
1	0.0131843	0.0174974	0.0128991	0.0124161	0.0142037	0.0271294	0.0187453	0.0168183	0.0153364	0.02978	0.0204312	0.0144392	0.0231114	0.017101	0.01436	0.0259738	0.0140464	0.0150692	0.0301613	0.0407287	0.0206734	0.0156059	0.0300433	0.0905063	0.0243644	0.0162737	0.028257	0.0181211	0.0293162	0.020953	0.0162408	0.0158729	0.015128	0.0422381	0.0201909	0.0202727	0.0225178	0.020768	0.0253756	0.016765	0.0196035	0.0174138	0.0197019	0.0217996	0.0185646
1	0.00290293	0.00371107	0.00423731	0.00406287	0.0039015	0.0182565	0.0114766	0.00888798	0.00701804	0.0141066	0.0175526	0.00737855	0.0162455	0.0161091	0.00755405	0.0151406	0.00817613	0.00971782	0.0455445	0.0735955	0.024658	0.0150875	0.0183851	0.207393	0.0391186	0.0260169	0.0163057	0.0119789	0.0636159	0.026211	0.0132283	0.0125781	0.012743	0.0697343	0.0187818	0.0114522	0.0261985	0.0128385	0.022461	0.0120556	0.00719234	0.014569	0.00940373	0.00748366	0.00493365
1	0.00284954	0.00347717	0.00439697	0.00394792	0.00376965	0.01749	0.0107587	0.00880187	0.00693578	0.0137296	0.0162146	0.00736171	0.0149141	0.0155822	0.00783601	0.0152311	0.00792793	0.00986177	0.0430625	0.0756004	0.0223575	0.0151749	0.0188321	0.208545	0.0383804	0.0248753	0.0163551	0.0120232	0.0656354	0.0288352	0.0129963	0.0123415	0.0124807	0.0716559	0.0188732	0.0112231	0.0280258	0.0133844	0.023869	0.0118651	0.00695698	0.0152172	0.00952251	0.00641507	0.00440982
1	0.00660777	0.00639465	0.00842944	0.00727687	0.00878274	0.0237773	0.0125928	0.0114274	0.00987897	0.0288175	0.017827	0.0107951	0.0319795	0.0134479	0.015693	0.0266646	0.0114717	0.0128592	0.0324881	0.048388	0.0277018	0.0153379	0.0335097	0.131164	0.0310929	0.0163313	0.0329078	0.0199929	0.0320568	0.0213543	0.0153316	0.0150984	0.0141953	0.0475336	0.0175283	0.0171683	0.0192379	0.0174762	0.025707	0.0134482	0.0178323	0.0148447	0.0192693	0.0205696	0.0177105
1	0.00387467	0.00284715	0.00618603	0.00413821	0.00428121	0.0276846	0.00995497	0.0078827	0.00572794	0.0328544	0.0182826	0.00636499	0.0402255	0.0102029	0.0136389	0.027427	0.00732079	0.0086355	0.0377941	0.0564979	0.032651	0.0120985	0.0348794	0.178139	0.0370007	0.012319	0.0349866	0.0181349	0.03587	0.01827	0.0105378	0.010877	0.00893468	0.0563276	0.0120933	0.0126706	0.0156289	0.0136192	0.0261804	0.00809946	0.0140705	0.0102777	0.0182167	0.0207215	0.0155732
1	0.00286412	0.00242657	0.00525687	0.00387944	0.00371443	0.0262381	0.0114153	0.00869273	0.00561779	0.0370166	0.0241584	0.00739412	0.0438943	0.0118303	0.0135184	0.0299873	0.0102379	0.0095107	0.0404676	0.0640198	0.0362935	0.0127964	0.0351238	0.179874	0.0334613	0.014823	0.0315069	0.0173798	0.0341819	0.0184225	0.0112394	0.0118374	0.0106211	0.0533404	0.0120846	0.0116635	0.0147785	0.0116478	0.023892	0.00749219	0.012199	0.00924114	0.0137699	0.0119976	0.00819167
1	0.00244995	0.00171314	0.00520134	0.00317311	0.00282437	0.0270107	0.011197	0.00749554	0.00471097	0.0340844	0.0215644	0.00602445	0.0385807	0.0102212	0.0126408	0.0274244	0.00825114	0.00791296	0.0365415	0.064934	0.0339432	0.0117853	0.0336265	0.178317	0.0322947	0.0154544	0.0321457	0.0173555	0.0367732	0.0206934	0.0107449	0.0111481	0.00956381	0.0608991	0.0117658	0.0122716	0.0157645	0.0131363	0.0287089	0.00731812	0.0144642	0.00968616	0.0181875	0.0176113	0.0123848
1	0.0056661	0.00902391	0.00620418	0.00520122	0.00644669	0.0184378	0.00973341	0.00820437	0.006757	0.0277057	0.0126245	0.00852576	0.0189204	0.00990465	0.00817042	0.0240622	0.00850388	0.00995351	0.0292884	0.0484122	0.0156731	0.011129	0.0351999	0.200353	0.0277519	0.0143625	0.0351911	0.0162198	0.0438318	0.0200386	0.0130854	0.0137492	0.0120134	0.064272	0.0165385	0.0145231	0.0218238	0.0164071	0.0304581	0.0122651	0.014598	0.0150821	0.0206245	0.0184407	0.0146219
1	0.00733302	0.0119835	0.00753555	0.00605927	0.00768633	0.0204459	0.0113343	0.00966116	0.00771068	0.0254457	0.0132252	0.00863844	0.0200726	0.0101599	0.00867736	0.020714	0.00892436	0.010012	0.0287251	0.0436732	0.0161564	0.011005	0.0301668	0.197828	0.0287567	0.0133492	0.0318478	0.0158165	0.044415	0.0193067	0.0130442	0.0132407	0.0117204	0.0623074	0.0170157	0.0149009	0.0219381	0.0171632	0.0289486	0.0123197	0.0143878	0.015639	0.0210185	0.0216976	0.0179924
1	0.00216422	0.00650328	0.00294577	0.00172784	0.00161632	0.0222642	0.00866881	0.00541286	0.00267081	0.0401826	0.0154309	0.005344	0.0220716	0.00794753	0.00458407	0.0326775	0.00687319	0.00792314	0.0370453	0.0807768	0.0201485	0.00851618	0.0458069	0.273636	0.027948	0.0133842	0.0379747	0.010881	0.043093	0.0172344	0.00754481	0.0087052	0.00659335	0.058891	0.00857538	0.00684334	0.0132292	0.00870735	0.021689	0.00468018	0.00735618	0.00710574	0.0119235	0.00882571	0.00587678
1	0.00339427	0.00997387	0.00406607	0.00217798	0.00218722	0.0212409	0.0126179	0.00536446	0.00306634	0.0297691	0.0185632	0.00491418	0.0219559	0.00780262	0.00473369	0.02204	0.0088874	0.00654904	0.0345401	0.0587633	0.0265296	0.00914482	0.0316203	0.2502	0.0298382	0.0238963	0.0307724	0.0142994	0.0498017	0.0159458	0.0107449	0.0123893	0.0103512	0.0593576	0.011956	0.0101015	0.016614	0.0101765	0.0235164	0.00678797	0.00808858	0.00949893	0.0172427	0.0166755	0.0118428
1	0.00774061	0.0102394	0.00660649	0.00664786	0.00586551	0.0195829	0.0154577	0.0122568	0.00781061	0.0182814	0.0270381	0.00794037	0.0230893	0.0152813	0.00834982	0.0168823	0.00841685	0.00994366	0.0436829	0.0912193	0.0261961	0.0103234	0.0225229	0.181854	0.0292432	0.0143048	0.0202684	0.0164209	0.0322609	0.0249062	0.0140008	0.0102998	0.00976877	0.0620993	0.0156268	0.0137797	0.0168955	0.0148521	0.0295166	0.0104247	0.0120431	0.0109321	0.0164739	0.0133187	0.00933367
1	0.00912674	0.0118728	0.0084992	0.00875008	0.00939735	0.0205875	0.0167198	0.0145992	0.0111538	0.0196049	0.02459	0.0114629	0.0224872	0.0164708	0.011679	0.0182021	0.011919	0.0124942	0.0344983	0.0700246	0.0244653	0.0140409	0.022544	0.129018	0.0265923	0.0185057	0.0210939	0.0181591	0.0296089	0.0258862	0.0169087	0.0142685	0.013928	0.0536261	0.0194406	0.0183424	0.0203433	0.0195122	0.0304726	0.0155657	0.0168806	0.0154805	0.0194047	0.0175192	0.0142527
1	0.00634465	0.0108034	0.0059606	0.00626977	0.00472354	0.0188319	0.0184315	0.0115668	0.00699152	0.0159839	0.0312921	0.00743196	0.0211401	0.0156921	0.00749547	0.0147151	0.00898136	0.00952692	0.0420657	0.0867163	0.0358647	0.010617	0.0196625	0.176783	0.0287089	0.0168372	0.0183266	0.0153609	0.0322965	0.0243225	0.0156373	0.0112527	0.0111178	0.0613274	0.0149844	0.0132718	0.0167417	0.0140491	0.0312955	0.00961533	0.0114302	0.0108773	0.0198587	0.0171267	0.0116696
1	0.0113519	0.0115647	0.00771889	0.007915	0.00659399	0.0196891	0.0183004	0.0125444	0.00811604	0.0182952	0.0302429	0.00838602	0.0238727	0.0156734	0.00892393	0.0168054	0.00996983	0.00963747	0.0440914	0.0908166	0.0359925	0.0117024	0.0215874	0.175066	0.0285963	0.0171538	0.0183584	0.0154489	0.0310052	0.0240455	0.0150899	0.0114063	0.0111921	0.0566728	0.0151572	0.0128437	0.0159585	0.0137025	0.0269364	0.00960596	0.0107602	0.00999191	0.0139714	0.0105713	0.00667438
1	0.00302032	0.00695712	0.00328273	0.00395471	0.00351875	0.0162035	0.0136634	0.00774854	0.00598429	0.0173243	0.0212892	0.00662889	0.0365377	0.0118917	0.00479789	0.0147197	0.00660837	0.00800662	0.0656334	0.0712563	0.0162223	0.00729079	0.0181089	0.32017	0.0300274	0.00947011	0.0166518	0.00863927	0.0369853	0.0143074	0.00713507	0.00689999	0.00615329	0.0655586	0.0084124	0.0062511	0.00996304	0.00764598	0.0209126	0.00508814	0.00639445	0.00597252	0.013596	0.0134697	0.00964684
1	0.00268912	0.00672255	0.00298696	0.00366458	0.00275406	0.0166283	0.0140386	0.00758185	0.0055336	0.0171013	0.0207097	0.00604604	0.03377	0.0112029	0.00414119	0.0140822	0.00569782	0.00718129	0.0628563	0.0713687	0.0148789	0.00661048	0.0178903	0.317481	0.0297475	0.00918693	0.0168946	0.00820684	0.0398403	0.015002	0.00694378	0.00717133	0.00601548	0.0711988	0.00788047	0.00581132	0.0100611	0.00769917	0.022653	0.00464211	0.00595757	0.00583959	0.0160668	0.0170289	0.0125344
1	0.00351119	0.00553614	0.00385352	0.00411607	0.00446381	0.0116032	0.0106569	0.00691565	0.00571585	0.0154459	0.0178464	0.00711906	0.0273464	0.0100915	0.00609458	0.0149998	0.00827223	0.00902001	0.0521223	0.0541887	0.0183724	0.00931469	0.021901	0.301004	0.0284525	0.0149391	0.0217471	0.0124084	0.0350777	0.0176137	0.0108139	0.0114475	0.0105343	0.0724593	0.0128753	0.0097499	0.01307	0.0110265	0.0266487	0.00810865	0.0090851	0.00852718	0.0148876	0.0119679	0.00904855
1	0.00197396	0.00480609	0.00238621	0.00275298	0.00239203	0.00999347	0.0110816	0.00533014	0.0042511	0.0114832	0.0177949	0.00475825	0.0270031	0.00871868	0.00407029	0.0106648	0.00671684	0.00609172	0.0551941	0.0552578	0.0236793	0.00816629	0.0158135	0.333078	0.0305653	0.0225793	0.0172253	0.0103388	0.0415785	0.0152263	0.00867216	0.00954569	0.00859317	0.0815767	0.00998252	0.00698971	0.0116615	0.0081601	0.0273688	0.00543281	0.00687604	0.00653883	0.0152581	0.0132668	0.00910561
1	0.00724404	0.00983462	0.00790673	0.00824665	0.0103273	0.0158062	0.0141526	0.012241	0.0104686	0.0160439	0.0169857	0.0111534	0.0206461	0.0124336	0.0104799	0.0159397	0.0119374	0.0124301	0.0261415	0.0694981	0.0159861	0.0120975	0.018738	0.212773	0.0248286	0.0137034	0.0178804	0.0139781	0.0280543	0.027609	0.0126245	0.0122186	0.0117718	0.0654312	0.0162399	0.0143109	0.0168683	0.0167009	0.0300688	0.0131939	0.0143527	0.0135202	0.0190642	0.0202329	0.0178352
1	0.00418856	0.00560305	0.00464812	0.00498804	0.00610749	0.00963007	0.00860015	0.00751727	0.00633023	0.0113128	0.0123913	0.00712452	0.0169993	0.00841889	0.00685647	0.0124578	0.00853679	0.00881899	0.0258691	0.0762703	0.0135234	0.00888466	0.0184911	0.28984	0.0269997	0.0109986	0.0168282	0.0115572	0.0343737	0.0319891	0.0102893	0.00896665	0.00845123	0.0956913	0.0136056	0.0107825	0.0148209	0.0149868	0.035068	0.00949102	0.0115464	0.00978874	0.0165834	0.0133401	0.010433
1	0.00297959	0.00500584	0.00337592	0.00387991	0.00474632	0.00936724	0.00911095	0.00637298	0.00545855	0.0112232	0.0136101	0.0066218	0.015697	0.00811831	0.00627147	0.0121272	0.00902452	0.0088304	0.0248124	0.0782551	0.0262707	0.010181	0.0170704	0.252586	0.0272596	0.0209844	0.017236	0.0134982	0.0333114	0.0335395	0.0149332	0.0116486	0.0109083	0.0803069	0.0157564	0.0125508	0.016394	0.0168315	0.0350788	0.0108501	0.0124778	0.0117723	0.0206348	0.0188476	0.0141824
1	0.0021422	0.00427041	0.00265991	0.00296696	0.00328851	0.00884641	0.00799581	0.00537054	0.00388871	0.0123038	0.0144351	0.0054887	0.0191091	0.00733863	0.00497749	0.013136	0.00801479	0.00844684	0.0303231	0.091105	0.0190824	0.00783141	0.0215	0.316061	0.0269349	0.0130268	0.0162459	0.0100502	0.0318966	0.0307654	0.00967295	0.00770706	0.00712797	0.0893417	0.0109016	0.00801618	0.0120297	0.0125407	0.0340833	0.00698238	0.00872094	0.00735985	0.0159589	0.0120477	0.00800615
1	0.0027131	0.00421359	0.00329868	0.00427904	0.00359895	0.0150563	0.0103783	0.00845465	0.00620955	0.0131475	0.0162495	0.00614397	0.0212886	0.0137838	0.00546799	0.0112635	0.0060028	0.0083333	0.0509694	0.121605	0.0139127	0.00722246	0.0172409	0.303949	0.024514	0.00992005	0.0135694	0.0072364	0.0365623	0.0236829	0.00594711	0.00547113	0.00500995	0.104069	0.00885365	0.00547224	0.0102221	0.00844657	0.0279627	0.00467437	0.00453812	0.00492314	0.00707032	0.00397321	0.00309943
1	0.0024927	0.0043753	0.00303856	0.00407707	0.0035754	0.0158428	0.0115832	0.00848134	0.00615605	0.0134472	0.0179124	0.00613775	0.023011	0.0141596	0.00535092	0.0110753	0.00594641	0.00811787	0.0553284	0.123957	0.0143759	0.00698579	0.0155423	0.308239	0.0251885	0.00925452	0.0121845	0.00675132	0.0369193	0.022143	0.00543749	0.00491346	0.00452292	0.101586	0.00808745	0.00477433	0.00971947	0.00751651	0.0262822	0.0042137	0.00400032	0.00454029	0.00653952	0.00350616	0.00271059
1	0.00527105	0.0069827	0.00596088	0.00663304	0.00789673	0.0158835	0.0145023	0.0112486	0.00970669	0.0142958	0.0192288	0.0096375	0.0209138	0.0147607	0.00928581	0.0128255	0.0102965	0.0110583	0.0401921	0.0813103	0.0265081	0.0124782	0.0168984	0.223415	0.0242465	0.0201464	0.015009	0.0117367	0.0288305	0.020967	0.0126317	0.0116076	0.0112864	0.0728298	0.0143283	0.0112481	0.0152662	0.0135254	0.0294467	0.0105305	0.0105487	0.0107865	0.0176381	0.016653	0.0135469
1	0.00373437	0.00484935	0.00421352	0.00468307	0.00542771	0.0107993	0.0100468	0.00773099	0.00670823	0.00989876	0.0136911	0.00683713	0.0149764	0.0108505	0.00691905	0.00978864	0.00790428	0.00861045	0.0359862	0.0766522	0.0252077	0.0107654	0.0154871	0.254075	0.0258789	0.0224359	0.0150061	0.0110144	0.0351582	0.023254	0.0119471	0.0107254	0.0103342	0.0969777	0.0137758	0.0100512	0.0159023	0.0134352	0.0386172	0.00917785	0.00931149	0.0101877	0.0210658	0.017403	0.0124969
1	0.00282448	0.00758977	0.00307239	0.00302328	0.00221413	0.016139	0.00909482	0.00924459	0.0045024	0.0218168	0.0193882	0.00577983	0.0306889	0.013134	0.00407975	0.0200645	0.00512859	0.00877673	0.0482732	0.146002	0.0137323	0.0068513	0.0280364	0.261571	0.026109	0.00789999	0.0236397	0.00733478	0.0277133	0.021283	0.00570782	0.00559108	0.00460437	0.0779795	0.00782123	0.00516497	0.00883701	0.00822082	0.027987	0.00431554	0.0065931	0.004853	0.0124	0.00903941	0.00587722
1	0.00331413	0.00636473	0.00360925	0.00389734	0.00394288	0.0144451	0.00888456	0.00944187	0.00593973	0.0230946	0.0181852	0.00748801	0.0290685	0.0138486	0.00648337	0.0228485	0.00687312	0.0101958	0.0440601	0.120768	0.0154256	0.00910148	0.032761	0.226003	0.0255142	0.0111168	0.0267865	0.00942599	0.0274467	0.022697	0.00797974	0.00836959	0.0073808	0.0776684	0.0105943	0.00760121	0.011708	0.0113408	0.0323558	0.0071154	0.0092996	0.0076667	0.0147561	0.0102788	0.00685275
1	0.00341731	0.00649336	0.00374696	0.00361353	0.00355737	0.0116341	0.00875302	0.00800661	0.00479519	0.0170961	0.0172329	0.00621074	0.021351	0.0108288	0.00517024	0.0166446	0.00772055	0.00847781	0.0366255	0.098148	0.0252961	0.00897055	0.0266862	0.241418	0.0257574	0.0152911	0.0250273	0.0101081	0.0300411	0.0228522	0.0104347	0.00946065	0.00836541	0.0884156	0.0120611	0.00843967	0.0133675	0.0123681	0.0396472	0.00794225	0.010748	0.00842259	0.0182502	0.0130399	0.00806521
1	0.00242571	0.00654318	0.00267465	0.00272023	0.00224389	0.0120115	0.0100395	0.00742404	0.00389341	0.0157982	0.019305	0.00490967	0.0242562	0.0107631	0.00423647	0.0144965	0.00683471	0.00695668	0.0416786	0.113984	0.0347879	0.00860562	0.020914	0.25231	0.02706	0.0214879	0.0198533	0.0087434	0.0318688	0.0207791	0.00931342	0.00796332	0.00721974	0.0837874	0.00952942	0.00654379	0.0114037	0.00950011	0.0351849	0.00584729	0.0080032	0.00669582	0.0178525	0.013111	0.0084391
1	0.00568989	0.00862683	0.0061051	0.00569927	0.0071242	0.0143941	0.0107612	0.00901257	0.0085849	0.0178562	0.0167147	0.00897847	0.0287638	0.0115082	0.00821917	0.0167986	0.0101095	0.0112667	0.035737	0.0813471	0.0193162	0.0118215	0.0205392	0.193379	0.0315402	0.0160445	0.021592	0.0172707	0.0408773	0.032763	0.013766	0.0142689	0.0130371	0.056863	0.0180846	0.017056	0.0198396	0.0186853	0.0245739	0.0125345	0.0128007	0.0127093	0.0145239	0.0127654	0.0100508
1	0.00343713	0.00573617	0.00382158	0.00359714	0.00444669	0.0102925	0.0075621	0.00639989	0.00608575	0.0140588	0.0132544	0.00654988	0.0242143	0.0092204	0.00612373	0.0135977	0.00786294	0.00926157	0.0333236	0.0835238	0.0175497	0.00994013	0.0189847	0.218183	0.0325116	0.0157717	0.021994	0.0166718	0.048664	0.0381903	0.0133466	0.0135477	0.0120193	0.070017	0.0176931	0.0166962	0.0207097	0.0196304	0.0299079	0.0118738	0.0121867	0.0121064	0.0159482	0.0134241	0.0100623
1	0.00489671	0.00771865	0.00565747	0.00558504	0.00717917	0.0142408	0.0119643	0.00972655	0.00822475	0.0213144	0.0206517	0.00980271	0.0319829	0.0123578	0.00901546	0.0196381	0.0116776	0.0125499	0.0396921	0.0816517	0.0245071	0.0126013	0.0235243	0.199305	0.0303786	0.0170943	0.0233599	0.0154328	0.036437	0.0303804	0.012815	0.0127651	0.0118522	0.0533021	0.0157246	0.0133029	0.0158086	0.0155737	0.0233429	0.0104618	0.0108331	0.0111196	0.0132718	0.0117917	0.00948679
1	0.00455881	0.00666184	0.00488838	0.00494734	0.00602524	0.0120125	0.00932095	0.00802328	0.00696996	0.0177424	0.0164602	0.00826014	0.0257432	0.0106041	0.00741159	0.0170591	0.010091	0.0113408	0.034826	0.077616	0.0197781	0.0109836	0.0223238	0.207299	0.029274	0.0169671	0.0236481	0.0155983	0.041551	0.035813	0.0131916	0.0134813	0.0116897	0.0659515	0.0166311	0.0148123	0.0187508	0.0183653	0.0292394	0.011573	0.0122242	0.012026	0.0155728	0.0128892	0.00980249
1	0.00240413	0.00304786	0.00356253	0.00501039	0.00300635	0.0145161	0.00861364	0.0133161	0.0106877	0.0201584	0.0183226	0.00829196	0.0261557	0.0341359	0.00767648	0.0189948	0.00639203	0.0125769	0.0477062	0.186273	0.0148773	0.0130812	0.0347621	0.158855	0.0225137	0.025133	0.0235845	0.00554333	0.0385009	0.0605373	0.00579896	0.00685862	0.0060706	0.0490621	0.00771365	0.00458473	0.0101979	0.0179506	0.0177742	0.00461699	0.00457224	0.00512336	0.00502227	0.00346357	0.00295265
1	0.00474147	0.00510783	0.005596	0.00600547	0.00686742	0.0141909	0.0113365	0.0144242	0.0124952	0.0173083	0.0183273	0.00965264	0.0224347	0.0291923	0.00943148	0.0161282	0.00877171	0.0131105	0.0392552	0.153413	0.0158161	0.0142717	0.026282	0.139404	0.0240863	0.0249752	0.0213363	0.00906085	0.0418765	0.056965	0.00962785	0.0100593	0.00953312	0.0527422	0.0122253	0.00897627	0.0152415	0.0215205	0.0216505	0.00826402	0.00821522	0.00890243	0.0083162	0.00672665	0.00613525
1	0.0020005	0.00313222	0.00331106	0.00561903	0.00298338	0.0150086	0.0144817	0.0154957	0.0112027	0.0184554	0.0262841	0.00776524	0.0303819	0.0342414	0.00841729	0.0156143	0.00932391	0.0109274	0.0528078	0.177554	0.0576747	0.0147339	0.0230951	0.149647	0.0233044	0.0287356	0.0165467	0.00491502	0.0335733	0.0426434	0.0129989	0.0076575	0.00701332	0.0374661	0.00650304	0.00371089	0.00938135	0.0141531	0.0149223	0.00378237	0.00410411	0.00512683	0.00631872	0.0041608	0.00282286
1	0.00280262	0.00364696	0.00375451	0.00500601	0.00397025	0.0118106	0.0108969	0.0116167	0.00926842	0.0141174	0.0193317	0.00742445	0.0226388	0.0253305	0.00828404	0.0139701	0.0082441	0.0108778	0.0441333	0.152292	0.0412564	0.015318	0.0234441	0.155358	0.0266172	0.0293476	0.0195344	0.00722407	0.0418572	0.0514574	0.0142806	0.0103161	0.0101373	0.0494087	0.0101284	0.00656605	0.0139947	0.020177	0.0217712	0.00627723	0.00676001	0.0080176	0.00965605	0.00689138	0.0047863
1	0.00462477	0.00682486	0.00454213	0.00444195	0.0050952	0.0195843	0.0164694	0.0123292	0.00750988	0.0280041	0.0279504	0.00842928	0.0207641	0.0144191	0.00999467	0.0255544	0.0080542	0.0116333	0.0342331	0.119904	0.0134788	0.0169113	0.0284316	0.194516	0.0241989	0.0298802	0.0242796	0.00912266	0.0364644	0.0322426	0.00818992	0.0107048	0.00999678	0.0698726	0.00984449	0.00744233	0.011748	0.0119554	0.0231289	0.00625748	0.00852169	0.00618793	0.00740962	0.00479439	0.00405691
1	0.00495979	0.00908916	0.00470491	0.0045023	0.00376456	0.0186786	0.0154077	0.00987739	0.00544511	0.0237067	0.0273549	0.00703162	0.0210189	0.0120363	0.00815483	0.0224231	0.00698253	0.009571	0.0359987	0.11316	0.0133188	0.0148965	0.0261453	0.225315	0.0257328	0.0277339	0.0214383	0.00789916	0.0414708	0.0302172	0.00693887	0.0093296	0.00864643	0.0792705	0.00882013	0.00600713	0.0111664	0.0105943	0.0262252	0.00521501	0.00828566	0.00555988	0.00800314	0.00440802	0.00349295
1	0.00650156	0.00815429	0.00615472	0.00585219	0.00707492	0.0144672	0.0145795	0.0109764	0.00938953	0.0203181	0.0292847	0.00905798	0.0136563	0.01409	0.00997553	0.0239838	0.0107044	0.0119722	0.029697	0.0667731	0.0168744	0.0178415	0.0367554	0.13942	0.019753	0.0354785	0.0238514	0.011397	0.0295382	0.0329195	0.0113015	0.0142182	0.0137894	0.0796512	0.0141015	0.0106143	0.0165671	0.019266	0.042962	0.0100461	0.0174444	0.011388	0.0230601	0.0173675	0.0117304
1	0.00378835	0.00723723	0.00360509	0.00341319	0.00309842	0.0124413	0.0171768	0.0087025	0.00652588	0.0190485	0.0391292	0.00587659	0.0138894	0.0133147	0.00701993	0.0216532	0.00932181	0.00807621	0.0366622	0.0773974	0.0253661	0.0176306	0.0301312	0.185599	0.021267	0.0430482	0.0201491	0.00767333	0.0339464	0.030804	0.00937341	0.0105884	0.0102919	0.0892895	0.00860764	0.00552022	0.0131665	0.0136924	0.0419132	0.00518852	0.0126956	0.00711121	0.0195863	0.0127899	0.00719249
1	0.00440222	0.00675583	0.00425772	0.00425397	0.00407509	0.0133966	0.0153071	0.00987055	0.00769833	0.0202049	0.0338763	0.00652222	0.0136475	0.0147943	0.00802826	0.0241867	0.00697033	0.00927636	0.0354308	0.0898478	0.0121714	0.0184155	0.0329294	0.176382	0.0182716	0.0405561	0.0217777	0.00766664	0.0317221	0.034466	0.00640428	0.0101418	0.00993358	0.0886067	0.00880009	0.00615712	0.0132898	0.0161358	0.0426874	0.00576091	0.0136754	0.00757041	0.020569	0.0143769	0.00872922
1	0.00589475	0.00923244	0.00604164	0.00561385	0.00653424	0.0183252	0.0214482	0.01335	0.0130542	0.0266134	0.0414309	0.00862649	0.0169193	0.0185246	0.0104556	0.0280859	0.00848569	0.0111749	0.0375486	0.0983339	0.0140178	0.0207913	0.0337505	0.166459	0.0191706	0.0412112	0.0225259	0.00783877	0.0280043	0.0302651	0.00685025	0.0102549	0.00986285	0.0675403	0.00843176	0.00590055	0.0107003	0.0128422	0.0286538	0.0050662	0.00998079	0.00584772	0.012922	0.00936612	0.00605174
1	0.0036953	0.00674062	0.0036692	0.00343509	0.00316902	0.0146908	0.0115372	0.00816486	0.00434529	0.0216249	0.0242019	0.00640171	0.0168618	0.0103312	0.00713075	0.0211285	0.00731612	0.0093379	0.0304919	0.101401	0.0153054	0.0135034	0.0283391	0.207724	0.023398	0.0271277	0.021728	0.00885517	0.0388344	0.0331316	0.00821092	0.0100528	0.00929308	0.0858985	0.00974186	0.00712834	0.0138916	0.0145313	0.0385648	0.00595126	0.0148834	0.00800222	0.0189297	0.0131733	0.00812539
1	0.00348301	0.00619412	0.00373382	0.00366946	0.00363922	0.0130452	0.0113169	0.00802825	0.00484755	0.0202036	0.0240634	0.0068773	0.017397	0.0108162	0.00805993	0.0210046	0.00824236	0.0102659	0.0327129	0.100353	0.0170475	0.0146531	0.0291364	0.206364	0.0250081	0.0273318	0.0214738	0.009527	0.0387581	0.0312375	0.00909047	0.0104705	0.0100736	0.0781972	0.0106709	0.00799083	0.0145759	0.0142633	0.0355171	0.00686227	0.0140823	0.00872051	0.0187089	0.0136247	0.0086598
1	0.00567328	0.00748817	0.00624149	0.00667369	0.00867418	0.0150389	0.0125736	0.0118522	0.0114912	0.0179337	0.0185755	0.0119538	0.0286176	0.0162957	0.0112233	0.0160143	0.0118222	0.0144327	0.043139	0.0720191	0.0214746	0.014485	0.019778	0.202011	0.0318689	0.0169285	0.0176718	0.0160048	0.0369044	0.0229662	0.0136307	0.0131917	0.0122625	0.0504588	0.0179735	0.0148402	0.0179178	0.0165188	0.0203457	0.0133641	0.0126723	0.0129118	0.0124131	0.0123376	0.0113347
1	0.00265634	0.00527842	0.00310512	0.00339194	0.00315544	0.0151024	0.00991981	0.00734012	0.00563242	0.0143275	0.0161104	0.00691791	0.0284113	0.0121651	0.00625592	0.0125871	0.00663722	0.0094873	0.0526773	0.0819933	0.0225257	0.00973847	0.0196556	0.271168	0.0407578	0.0123075	0.0163356	0.0117083	0.0562949	0.0234498	0.00921979	0.00723857	0.00641281	0.076964	0.0136038	0.00878712	0.0145992	0.0108371	0.0247347	0.00826421	0.00664702	0.00790789	0.00787714	0.00547254	0.00434013
1	0.00204151	0.00469883	0.00240751	0.00273818	0.00237856	0.0133277	0.0103439	0.00627473	0.00465543	0.0125701	0.015645	0.00582651	0.0256274	0.0101264	0.0052666	0.0102144	0.00630699	0.0077296	0.0473882	0.0721783	0.0285534	0.00945086	0.0166926	0.2726	0.0366886	0.0188958	0.015072	0.0106822	0.0511375	0.0225538	0.0103689	0.00816381	0.00735655	0.0827541	0.0128571	0.0084375	0.0165788	0.0122945	0.0343216	0.0089066	0.00809559	0.0106017	0.0136285	0.00943563	0.00612694
1	0.00162458	0.00433455	0.00203913	0.00235623	0.00186531	0.0132263	0.0105311	0.00585295	0.00429046	0.0133626	0.0167646	0.0053734	0.0283358	0.00982656	0.00481528	0.0102878	0.00609857	0.00697867	0.0500494	0.0702928	0.0303519	0.00887288	0.0174699	0.277614	0.0385265	0.0204498	0.0154507	0.0099607	0.0515017	0.0217295	0.0102329	0.00755463	0.00651349	0.0870365	0.0125133	0.00762299	0.0159946	0.0111164	0.0337961	0.00842177	0.00768328	0.010028	0.0107993	0.00665292	0.00380035
1	0.00238106	0.00375415	0.00296413	0.00354725	0.00260201	0.0146039	0.00715229	0.00871106	0.0051948	0.0129339	0.0119934	0.00688001	0.0130875	0.0147452	0.00477229	0.0101103	0.00463236	0.00863308	0.0408592	0.118281	0.0108155	0.00780588	0.0173984	0.249393	0.0233511	0.012728	0.0159095	0.00710255	0.0383314	0.0428415	0.00543596	0.00577566	0.00528844	0.0911868	0.00941171	0.00677782	0.0153673	0.0207266	0.0384474	0.00634325	0.00639298	0.00946176	0.0220179	0.0196726	0.0141779
1	0.00348796	0.00508774	0.00421609	0.00493299	0.00440828	0.0171111	0.008968	0.0108997	0.0073394	0.0160353	0.0142869	0.00939465	0.0162195	0.0176892	0.00722958	0.0128715	0.00699421	0.0112952	0.0432097	0.12017	0.0132809	0.0100995	0.0197296	0.232075	0.0234845	0.0139844	0.0162329	0.00876219	0.0330993	0.0372477	0.00762213	0.00767573	0.00738581	0.0720706	0.0114317	0.00884904	0.0149896	0.019139	0.0312531	0.00853314	0.00820609	0.00993477	0.0174383	0.0148053	0.0108232
1	0.00155872	0.00269187	0.0022696	0.00274886	0.00181104	0.0137539	0.00680448	0.00786804	0.00460437	0.0149476	0.0130878	0.00725034	0.0145795	0.0157918	0.00489889	0.0123381	0.00527628	0.0101674	0.0465035	0.132607	0.0145936	0.00790749	0.0219603	0.273841	0.0225246	0.0131588	0.0159722	0.00649829	0.0332165	0.0395634	0.00597073	0.00550847	0.00508703	0.0823884	0.00824567	0.00562579	0.0126319	0.0180423	0.0329237	0.00508527	0.00516106	0.00725601	0.0165165	0.0114656	0.00729549
1	0.00152349	0.00305732	0.00216309	0.00298497	0.00170147	0.0150724	0.00879539	0.00865504	0.00475207	0.0144338	0.0155038	0.00643526	0.0172306	0.0155499	0.00457247	0.0105874	0.00553268	0.00860812	0.0503301	0.127443	0.0263872	0.00825465	0.0177257	0.293336	0.0241305	0.0165344	0.0137243	0.00570425	0.0326774	0.0333113	0.00736063	0.00520791	0.00447855	0.078185	0.00740206	0.00493042	0.0111396	0.0143391	0.0282431	0.004522	0.00459728	0.00604316	0.0127291	0.00867234	0.00543081
1	0.00539945	0.0064578	0.00594484	0.00615353	0.00695662	0.0127634	0.010526	0.00994968	0.00799838	0.0122989	0.0136249	0.00925016	0.0197517	0.0121435	0.00873916	0.0121601	0.00893266	0.0106821	0.035606	0.0810482	0.0148542	0.0112809	0.0188659	0.238329	0.0238357	0.0152211	0.0169538	0.0110715	0.0376188	0.0256057	0.0106477	0.0106138	0.00994895	0.0808907	0.0136318	0.0111548	0.015489	0.0151515	0.0369102	0.0105625	0.0119209	0.0110611	0.0205656	0.0175229	0.0139056
1	0.00268647	0.0039486	0.00316802	0.00348946	0.00325497	0.0101243	0.00794243	0.00716396	0.00476462	0.0105306	0.0127793	0.00605299	0.0214968	0.0103404	0.00496698	0.00968522	0.00544391	0.00738526	0.0427891	0.106996	0.0125486	0.00821708	0.0148897	0.304795	0.0244749	0.0116466	0.0129632	0.00641144	0.0446038	0.0259819	0.00542212	0.00571989	0.0053073	0.0934426	0.00792082	0.00558174	0.0118171	0.0110789	0.0384767	0.00541159	0.00710858	0.00710714	0.0189524	0.0145461	0.0105648
1	0.00162	0.00228835	0.00169316	0.00183069	0.00146715	0.00555869	0.00507529	0.00387283	0.00242794	0.00580452	0.00892158	0.00369785	0.0133738	0.00701159	0.0035039	0.00663716	0.00439609	0.00560077	0.0362806	0.0929028	0.0252874	0.00854784	0.0130696	0.323515	0.0253971	0.0210185	0.0131118	0.00660934	0.0452125	0.0257803	0.00854173	0.0077268	0.00759514	0.0979358	0.00862637	0.00547066	0.0123875	0.0116712	0.0430804	0.00512942	0.00658474	0.00737452	0.0240036	0.0186371	0.0137214
1	0.00135714	0.00313642	0.00214867	0.00252401	0.0016251	0.00892337	0.0106474	0.0065369	0.00370558	0.00876412	0.0174066	0.00542652	0.024815	0.0103988	0.00473025	0.00796644	0.00589108	0.00669144	0.0485597	0.102293	0.0338779	0.0101803	0.0127541	0.317401	0.0260394	0.0269258	0.0112347	0.00605072	0.040914	0.0198016	0.00770572	0.00747762	0.00707835	0.0767407	0.00714633	0.00410148	0.00945905	0.00764412	0.0309898	0.00393244	0.00461159	0.00527962	0.017484	0.0130074	0.00861463
1	0.00176	0.00214808	0.00238511	0.00294037	0.00269407	0.00955311	0.0069347	0.00830356	0.0124255	0.0202239	0.0144993	0.00738108	0.0331176	0.0254377	0.0117033	0.0205842	0.00705398	0.0128203	0.0478609	0.117845	0.0277442	0.0176633	0.0407764	0.135615	0.0462244	0.0269701	0.0329455	0.00774619	0.06091	0.0485109	0.0113595	0.00841148	0.00850343	0.0472783	0.0175612	0.0061717	0.0214258	0.0153212	0.0183111	0.0091751	0.00431621	0.00903436	0.00481309	0.00311562	0.00242456
1	0.00514478	0.00673083	0.00667746	0.00819921	0.00589176	0.0199263	0.0125351	0.0184438	0.0126954	0.0219544	0.024263	0.0106653	0.0173707	0.0342686	0.0106598	0.0217881	0.00901198	0.0151016	0.0431897	0.137366	0.0148516	0.0157663	0.028408	0.133444	0.0257771	0.025542	0.0232341	0.0080857	0.0429552	0.0393027	0.00916335	0.00955053	0.00923763	0.0510641	0.0140747	0.00829297	0.0194669	0.0154334	0.0223087	0.00895746	0.005614	0.00993594	0.00772489	0.00541179	0.00451291
1	0.00324283	0.00406661	0.00414399	0.00491874	0.00429679	0.0136942	0.00978094	0.00965001	0.0120875	0.0168741	0.0153549	0.00778987	0.0284885	0.0214539	0.0115547	0.01688	0.00838895	0.0118865	0.0412446	0.0961368	0.0322691	0.0183413	0.0327321	0.120852	0.0454578	0.0277588	0.0297644	0.010363	0.0599884	0.0429447	0.0161065	0.0118225	0.0119207	0.045239	0.0203266	0.00928076	0.0256101	0.0183138	0.021903	0.0122311	0.00696835	0.015143	0.0104265	0.00728203	0.00501999
1	0.0042961	0.0056593	0.00571261	0.00654754	0.006363	0.0162319	0.0133363	0.01172	0.0141863	0.0189661	0.0178807	0.00953935	0.0310275	0.0233477	0.0132558	0.0183051	0.0103556	0.0132122	0.0429541	0.0984875	0.0370935	0.0194268	0.0298665	0.114759	0.0429183	0.0266789	0.0264224	0.0102164	0.0534255	0.0377502	0.0162604	0.0115209	0.0117453	0.0382309	0.0182145	0.00922021	0.022419	0.0160069	0.0189276	0.0114946	0.0073016	0.0137868	0.0102033	0.00818521	0.00654048
1	0.00352808	0.00666373	0.00419854	0.00433537	0.00465261	0.0163228	0.00895135	0.00908849	0.00654057	0.012685	0.018612	0.00778195	0.0153721	0.0155192	0.0067898	0.0125737	0.00808213	0.0114649	0.0391449	0.0967145	0.0164545	0.0123434	0.0169338	0.170216	0.0442708	0.0180389	0.0144918	0.0119479	0.0822801	0.0339112	0.0103728	0.00868692	0.00848105	0.0582614	0.0191676	0.0108846	0.0329441	0.0154523	0.0263841	0.0132859	0.0114737	0.0236904	0.0125214	0.0105715	0.00791265
1	0.00539428	0.0075689	0.00565751	0.00561002	0.00650335	0.0165803	0.00994009	0.0102579	0.00813171	0.0143949	0.0178753	0.00943908	0.0166862	0.0160871	0.00906458	0.0154114	0.0102509	0.0132515	0.0378885	0.0899862	0.0187777	0.0145779	0.0225167	0.155668	0.0418738	0.0191413	0.0168671	0.0134408	0.0700383	0.0315072	0.0121583	0.0109178	0.0107011	0.0513812	0.0200715	0.0126294	0.0302856	0.0162932	0.0247513	0.0144062	0.0126103	0.0219268	0.0122462	0.0106273	0.00860554
1	0.00288537	0.00523864	0.00339761	0.00325802	0.00345141	0.0142468	0.00790224	0.00742086	0.00480406	0.0133281	0.0178539	0.00702883	0.0149493	0.0136283	0.00648172	0.0143616	0.00854151	0.0114568	0.0410777	0.0926687	0.0225638	0.0123777	0.0236969	0.183383	0.0428152	0.0186505	0.0169482	0.0114063	0.0771416	0.03335	0.01138	0.00934594	0.00872399	0.0610909	0.0182222	0.00994279	0.0331052	0.0149269	0.0283821	0.012362	0.0111567	0.0234215	0.0106663	0.0067652	0.00419332
1	0.00452417	0.0080361	0.00500788	0.00528693	0.00698654	0.0178057	0.0127903	0.00997119	0.00778428	0.0137702	0.0212869	0.00904798	0.017172	0.016563	0.00853788	0.0132135	0.0105181	0.0120906	0.037392	0.0864146	0.0335564	0.0151052	0.0162353	0.144763	0.0409216	0.0241266	0.0161077	0.0137303	0.0662016	0.0296337	0.0158301	0.0145596	0.0141263	0.04848	0.0202631	0.0131811	0.0291312	0.0156827	0.0233587	0.0143982	0.0120902	0.0207875	0.0125161	0.0114086	0.00960558
0	0.00339419	0.00472157	0.00424521	0.00487603	0.00512222	0.0109885	0.00996779	0.00805887	0.00721549	0.0125565	0.013128	0.0072797	0.0297434	0.0125104	0.0133562	0.0124642	0.00750076	0.009356	0.0630583	0.0864659	0.0292398	0.0109646	0.0207854	0.269908	0.0337584	0.0111908	0.0165073	0.00886336	0.0321201	0.0236076	0.00862033	0.00862671	0.00776484	0.0588688	0.0110056	0.00896769	0.012104	0.0126305	0.024787	0.00851262	0.00889709	0.00904532	0.0164993	0.0122486	0.00846691
0	0.00364155	0.00499877	0.00440799	0.00521189	0.00561929	0.011248	0.0102937	0.00844163	0.00757262	0.0125213	0.012561	0.00742219	0.0278747	0.0123302	0.0130874	0.0121205	0.00789136	0.00951457	0.0606438	0.0865081	0.027471	0.0107578	0.0210661	0.267813	0.0331378	0.0112052	0.0168913	0.00910374	0.0317764	0.0240074	0.00859587	0.0085757	0.00796051	0.059986	0.0114237	0.00935652	0.0123891	0.0135438	0.0252862	0.00898871	0.0092159	0.00957966	0.0167701	0.0122912	0.00889741
0	0.000741974	0.00157897	0.00115089	0.00202545	0.00120126	0.00984581	0.00865871	0.00526971	0.00385511	0.0137252	0.0141692	0.00441771	0.0344647	0.0111915	0.0113008	0.0110813	0.00500172	0.00675856	0.0751511	0.104275	0.0341031	0.00793007	0.0222284	0.2968	0.0365133	0.0106957	0.0190552	0.00541403	0.0397577	0.0280282	0.00523946	0.00523532	0.0041952	0.0769419	0.00632227	0.00371325	0.00813692	0.0098039	0.0246248	0.00302652	0.00324901	0.00360931	0.00948723	0.00619072	0.00383434
0	0.000767602	0.00166776	0.0012139	0.00211471	0.00117468	0.0106186	0.00903052	0.00548101	0.0041487	0.0147336	0.014571	0.00462574	0.0369252	0.0115012	0.0117451	0.0116752	0.00474843	0.00671946	0.0773826	0.106219	0.0335602	0.00753586	0.0220588	0.296458	0.0359519	0.009803	0.0183308	0.00495489	0.0392012	0.0274181	0.00465922	0.00498449	0.00393091	0.0753532	0.00600493	0.003514	0.00774099	0.0095847	0.0241489	0.00281473	0.0031822	0.00341087	0.00897202	0.00584289	0.0035189
0	0.00467892	0.0076451	0.00650884	0.0059722	0.0060752	0.0312609	0.0129111	0.0102222	0.00872332	0.0343109	0.0167063	0.00848749	0.0351982	0.0166567	0.00839732	0.0376753	0.00954315	0.0115444	0.050112	0.0914295	0.021606	0.0112644	0.0556126	0.145058	0.0339971	0.0120889	0.0530359	0.0239334	0.0375634	0.0148308	0.0105978	0.010712	0.00967087	0.0316554	0.0128266	0.0133051	0.0136473	0.0110344	0.0127318	0.00757018	0.00773139	0.0076429	0.00966865	0.00990447	0.00825153
0	0.0046687	0.00826891	0.00684758	0.00605435	0.00510637	0.0372621	0.0133476	0.00996975	0.00809261	0.0355534	0.0159413	0.00712334	0.0359183	0.0164912	0.00739357	0.0372917	0.008089	0.00992917	0.0497194	0.0938794	0.0210981	0.0102182	0.056	0.1494	0.0363766	0.0107926	0.0572909	0.023844	0.0379732	0.0130251	0.00910123	0.00922308	0.00786509	0.033498	0.0118371	0.0131009	0.0117406	0.0102657	0.0125625	0.00637079	0.00715194	0.00692249	0.00929301	0.00988533	0.0082157
0	0.00280178	0.00476394	0.00393934	0.00366832	0.00301243	0.0222546	0.0089052	0.00674889	0.00459202	0.0285186	0.0131882	0.00575052	0.0274845	0.011316	0.00579473	0.0339562	0.00789325	0.00909822	0.044361	0.0944004	0.0210795	0.00949335	0.0609397	0.167453	0.0345296	0.0134828	0.0645111	0.0284154	0.0441447	0.0190271	0.0113299	0.0127853	0.0110116	0.0460091	0.0139065	0.0140375	0.0146827	0.0106047	0.0160664	0.00669036	0.00753101	0.00729475	0.00930282	0.00769275	0.00552975
0	0.00250986	0.00496405	0.00358177	0.00347484	0.00238887	0.0231228	0.0113136	0.00656811	0.00443763	0.0261587	0.0151673	0.00468776	0.0275175	0.0110925	0.0050744	0.029885	0.00904474	0.00786713	0.045136	0.0954084	0.0282584	0.0093493	0.0523345	0.170254	0.0370491	0.0152692	0.0594153	0.0288756	0.0514169	0.0171164	0.0112593	0.0127555	0.0107308	0.0462604	0.0132221	0.0144463	0.0143385	0.010116	0.0157277	0.00576092	0.00694226	0.00660769	0.00946792	0.00804446	0.00558039
0	0.00542978	0.0157532	0.00651692	0.00539691	0.0037357	0.0397414	0.0166804	0.0103017	0.00810384	0.0502107	0.0230562	0.00721999	0.0383074	0.0151342	0.00944442	0.0396813	0.00655982	0.00896265	0.0550368	0.0848599	0.0282809	0.00913507	0.0462766	0.189093	0.0277489	0.00904567	0.0317166	0.0114468	0.0290067	0.0141765	0.00745019	0.00729791	0.00562757	0.0424664	0.00796303	0.00815	0.00955354	0.0088039	0.0154054	0.00458396	0.00795174	0.00538267	0.00922857	0.00874449	0.00533056
0	0.0042064	0.00836499	0.0049368	0.00456954	0.00493899	0.0250534	0.0139294	0.0102362	0.00877804	0.0467748	0.0228659	0.00884131	0.0368519	0.0160729	0.0108799	0.0393758	0.00851304	0.01065	0.0533213	0.0812827	0.0291326	0.0112566	0.0458064	0.181318	0.0289173	0.0117281	0.0325651	0.0137101	0.02956	0.0165927	0.0100435	0.010378	0.0086167	0.0432853	0.0115143	0.0114368	0.01288	0.0107115	0.0149111	0.00784424	0.00830732	0.00752073	0.00788608	0.00739867	0.0062359
0	0.00331915	0.0092659	0.00366455	0.00324593	0.00232078	0.0218804	0.0117221	0.0068347	0.00509837	0.0311643	0.019055	0.0057252	0.0250036	0.0112072	0.00709208	0.0280828	0.00739364	0.00778068	0.0445083	0.0779323	0.0281933	0.00929617	0.0393083	0.203395	0.0288378	0.0132649	0.0311553	0.014293	0.0376982	0.0211222	0.010137	0.0101699	0.00854128	0.0635917	0.0116061	0.0125943	0.0156003	0.0134977	0.0271244	0.00717669	0.0130133	0.00898011	0.016452	0.0142246	0.00843011
0	0.00478499	0.0117283	0.00479819	0.00418486	0.00309036	0.0249644	0.0134558	0.00812267	0.00599851	0.0345372	0.0201678	0.00646326	0.0259858	0.0120245	0.00766285	0.0288406	0.00774956	0.00826115	0.0427808	0.0730752	0.0277898	0.00967303	0.0381111	0.186953	0.0280983	0.0138619	0.029989	0.0147175	0.0368075	0.0208288	0.0111567	0.0111974	0.00949174	0.0605711	0.0127547	0.0137792	0.0164339	0.0138067	0.0260853	0.00820835	0.0129129	0.00973222	0.0160116	0.0138895	0.00846145
0	0.00485018	0.00806123	0.00572278	0.00634079	0.00609732	0.0244668	0.0158494	0.00925018	0.00920647	0.0212755	0.0166132	0.0079206	0.0460089	0.0136666	0.0139529	0.0189091	0.00897847	0.00959528	0.0669592	0.039807	0.0308292	0.0113512	0.0278664	0.166503	0.0437816	0.012821	0.0308608	0.0165604	0.0493023	0.0156409	0.0125017	0.0130016	0.0114924	0.0510782	0.0164873	0.0139169	0.0201255	0.0142747	0.0199633	0.010444	0.0106993	0.0130357	0.0123927	0.0116329	0.00990484
0	0.00678132	0.0104315	0.00771199	0.00841741	0.00863328	0.0291185	0.0182753	0.0122194	0.0122148	0.0248434	0.0186048	0.0105716	0.045452	0.0157102	0.015739	0.0205981	0.0108796	0.0115734	0.059789	0.0384334	0.0287829	0.0130372	0.0270971	0.142126	0.0376886	0.014386	0.0284907	0.0168154	0.0414634	0.0163604	0.0134046	0.0138088	0.0128097	0.0434701	0.0170561	0.0149337	0.0198314	0.0152102	0.0195387	0.0121025	0.0125161	0.0138875	0.0135897	0.0135594	0.0120362
0	0.000456237	0.00339901	0.00179507	0.00310765	0.00180293	0.0212951	0.0147976	0.00565692	0.00636027	0.0183924	0.0219393	0.00456644	0.0526336	0.0126429	0.0129856	0.0147826	0.00905071	0.00644733	0.0825232	0.0461741	0.0442268	0.0136408	0.0249878	0.203915	0.0481208	0.0262936	0.0278466	0.0155881	0.0574164	0.0129035	0.010889	0.0151309	0.0121256	0.0501617	0.0126333	0.00979774	0.0161064	0.00814602	0.015912	0.00557596	0.00510782	0.00782509	0.00821127	0.00380489	0.00282372
0	0.00221985	0.00504448	0.00265466	0.00346041	0.00183574	0.0206026	0.0141474	0.00587208	0.00590335	0.0181007	0.0160435	0.00456842	0.0406999	0.011009	0.0109424	0.0154349	0.0063607	0.00656407	0.0725901	0.0482689	0.0354896	0.0103874	0.0263245	0.210671	0.0484684	0.0157261	0.0296598	0.0141442	0.0597139	0.0155495	0.00996457	0.0117379	0.00947094	0.0608172	0.0137096	0.0107868	0.0203472	0.0107904	0.0223483	0.00686843	0.00733999	0.0112446	0.0117945	0.00866889	0.00565291
0	0.00135965	0.00315592	0.00209454	0.00402534	0.00210234	0.0139478	0.009579	0.00723095	0.00674962	0.0146712	0.0133034	0.00606428	0.0504309	0.0169582	0.0112354	0.014776	0.00551046	0.00864167	0.0997469	0.126244	0.0315436	0.0094634	0.0238634	0.281388	0.0345271	0.0082841	0.0170385	0.010647	0.027714	0.0127609	0.00729675	0.00625545	0.00533096	0.0410313	0.00718258	0.00524215	0.00729274	0.00613575	0.0125435	0.00369701	0.00475122	0.0041918	0.00737872	0.00414405	0.00246779
0	0.00156555	0.00274413	0.00182981	0.00358203	0.00195666	0.0150676	0.0102848	0.00707323	0.00710284	0.0159504	0.0137704	0.0058826	0.0487321	0.0158589	0.0106	0.0140967	0.00546425	0.00815135	0.0910244	0.110888	0.0300809	0.00935523	0.0229123	0.250908	0.0361534	0.00990451	0.0216768	0.0142696	0.036945	0.0167118	0.00825192	0.00780246	0.00658866	0.054456	0.00934776	0.00704143	0.0102424	0.00786019	0.0160606	0.00459124	0.0058998	0.00513531	0.00725895	0.00522344	0.00369613
0	0.00130398	0.00285787	0.0017304	0.00351428	0.00168025	0.0141531	0.0116201	0.00659857	0.00579746	0.0135734	0.0146045	0.00504306	0.0430344	0.0133724	0.00881278	0.0115077	0.00581523	0.00710908	0.0828171	0.0962371	0.036915	0.0103427	0.0197207	0.269741	0.0355349	0.0165344	0.020178	0.0145961	0.0406798	0.0168456	0.00945854	0.00915924	0.00750602	0.057945	0.00909914	0.00664213	0.0102239	0.00730884	0.0176033	0.00418883	0.00533824	0.00512402	0.00824686	0.00596772	0.00391732
0	0.00137837	0.0027778	0.0017097	0.00337495	0.00165989	0.0135285	0.0106529	0.00650478	0.00550253	0.013033	0.013276	0.0051508	0.0373376	0.012673	0.00832264	0.0112453	0.00571382	0.0078656	0.077347	0.0968444	0.0309035	0.00959961	0.0220224	0.268373	0.0341586	0.0139648	0.0226014	0.014602	0.0401827	0.0193193	0.00941959	0.00933841	0.00799752	0.0655096	0.0099316	0.00731405	0.0114877	0.00839662	0.0212567	0.00481254	0.00627836	0.0057562	0.00991903	0.00668878	0.00426751
0	0.00256821	0.00405259	0.00319058	0.0047198	0.00355756	0.0178036	0.0106842	0.0100106	0.00648897	0.0122758	0.017324	0.00710252	0.0201738	0.0149607	0.0124287	0.0108678	0.00627265	0.00950643	0.0478508	0.126751	0.0280755	0.010694	0.0168468	0.265312	0.033672	0.0125712	0.0153255	0.0104608	0.037428	0.0270833	0.00749964	0.00647274	0.00590663	0.066648	0.00942551	0.00904813	0.0106991	0.0104457	0.0220025	0.00546858	0.00519709	0.00589785	0.0112474	0.010303	0.00767864
0	0.00274502	0.00370991	0.00324188	0.00442321	0.00407271	0.013634	0.00941393	0.00885337	0.00622903	0.0111662	0.0162557	0.0072273	0.0188421	0.0136008	0.0114599	0.010484	0.00684018	0.00978991	0.0466653	0.116128	0.026468	0.0101891	0.0178333	0.270205	0.0322963	0.0121038	0.0147044	0.0103743	0.038245	0.0277582	0.00737482	0.00633135	0.00608799	0.0737316	0.00991735	0.00968895	0.0118587	0.0110669	0.0272221	0.00613545	0.00615685	0.00686615	0.0136838	0.0108078	0.00811043
0	0.00336849	0.0043239	0.00379373	0.00489177	0.00454764	0.0146425	0.0118191	0.00931696	0.00640564	0.0109325	0.0167446	0.0071805	0.0171163	0.0132091	0.0107963	0.0101892	0.00774136	0.00915515	0.0424305	0.1081	0.0423105	0.0120293	0.0145239	0.25555	0.0295236	0.0213212	0.0145924	0.0120923	0.03332	0.0255315	0.0117697	0.0103709	0.00960213	0.0629551	0.0118786	0.0103856	0.0120559	0.0122459	0.0231137	0.00744231	0.0072047	0.0076836	0.0132363	0.0123848	0.0101717
0	0.00192936	0.00288998	0.00239922	0.00337395	0.00264616	0.0112626	0.00976916	0.0073244	0.00473658	0.00933985	0.0169685	0.00573442	0.0178801	0.0118301	0.00924041	0.00885036	0.00676973	0.00794301	0.0464907	0.102985	0.041187	0.0104683	0.0174137	0.286002	0.0322145	0.0200787	0.0142971	0.00999507	0.0361353	0.0246893	0.00955183	0.00808421	0.00688098	0.0750191	0.00980263	0.00851089	0.0110355	0.0102243	0.0273705	0.00562289	0.00526052	0.00636484	0.0136243	0.0115006	0.008302
0	0.00291967	0.00488986	0.00408434	0.00417294	0.00416195	0.0206144	0.00961619	0.00937329	0.0068345	0.0238952	0.0217934	0.00805714	0.0181828	0.0151757	0.00885426	0.0308902	0.00889688	0.0123587	0.0457075	0.0876602	0.0186744	0.0112232	0.0439699	0.215352	0.0373472	0.0129403	0.036085	0.0131685	0.0394901	0.0244159	0.00830255	0.00778902	0.00704667	0.0568192	0.0110546	0.00857024	0.0139787	0.0116507	0.0230648	0.00640991	0.0081804	0.0073049	0.0115083	0.00986796	0.00764673
0	0.00351888	0.00515521	0.00447118	0.00462726	0.00532706	0.0159819	0.00982427	0.00871793	0.00720165	0.0191298	0.0202593	0.00789127	0.0177488	0.0132473	0.00839256	0.0256016	0.00961862	0.0117081	0.0461309	0.070491	0.0194966	0.0109953	0.0376327	0.220955	0.0397392	0.0125619	0.032907	0.0141456	0.0410773	0.0222026	0.00885179	0.00816982	0.00732902	0.0625244	0.0120737	0.00982229	0.0158775	0.0123682	0.0271518	0.0081931	0.0101561	0.00955235	0.0150738	0.0145388	0.0115597
0	0.00143669	0.00368455	0.00272605	0.0027206	0.00207198	0.0176213	0.0105287	0.00683653	0.00456003	0.0204018	0.0238324	0.00601032	0.0171516	0.0128924	0.00643259	0.0268865	0.0107697	0.0101518	0.0479471	0.0828554	0.0286308	0.0106903	0.0414771	0.233923	0.038449	0.0192549	0.0339658	0.0127381	0.0393226	0.0233672	0.00952493	0.00918589	0.00775678	0.0624941	0.0103796	0.00721471	0.0129474	0.010474	0.0250681	0.00505318	0.00687434	0.00617331	0.0122037	0.00918872	0.006124
0	0.00122375	0.00254045	0.00189826	0.00200638	0.00170183	0.0109768	0.00749128	0.00465323	0.00336156	0.0142226	0.0188325	0.00449884	0.0154472	0.00960857	0.00531371	0.0208208	0.00920629	0.00805123	0.0479392	0.0692338	0.0285602	0.00932575	0.0360893	0.256882	0.0430289	0.0179379	0.0310599	0.0134799	0.0464254	0.0226572	0.00973746	0.00873333	0.00703252	0.0783155	0.0112422	0.00769018	0.015873	0.0108909	0.0343927	0.00583206	0.00879398	0.00740705	0.0144173	0.00951289	0.00565392
0	0.00204042	0.00255424	0.0030961	0.00423448	0.00243044	0.0134176	0.00776948	0.0102911	0.00965148	0.0132097	0.0152791	0.00746151	0.0221379	0.0249333	0.012972	0.0136309	0.00603034	0.010622	0.053633	0.108838	0.0245183	0.0164043	0.0307699	0.221148	0.0390544	0.0236757	0.0176137	0.00554557	0.0504554	0.0301256	0.00855971	0.00719805	0.00765498	0.0555806	0.0137532	0.0044888	0.0200971	0.0130003	0.0204437	0.0081632	0.00451134	0.012437	0.00892758	0.00670099	0.00493879
0	0.00246899	0.00309018	0.00371409	0.00512507	0.00255349	0.0161512	0.00993408	0.0116775	0.0108904	0.0133815	0.0187024	0.00804892	0.0246389	0.0269544	0.0143362	0.0128879	0.00660058	0.0112456	0.0569406	0.106019	0.0270875	0.0171493	0.0254712	0.211597	0.0416541	0.0240208	0.0160357	0.0061447	0.0530501	0.027055	0.00896711	0.00751647	0.0077802	0.0495327	0.0134725	0.00471314	0.0196541	0.0113599	0.0175661	0.00775673	0.00431547	0.0116556	0.00867573	0.00711741	0.00529053
0	0.00145328	0.00203555	0.00244624	0.00390626	0.00172737	0.0142857	0.0109865	0.0113186	0.0101034	0.0151858	0.0217113	0.00763707	0.0271665	0.0266596	0.0139391	0.0149656	0.00818227	0.0111388	0.0626879	0.107268	0.0421103	0.0178358	0.0317744	0.219115	0.0383366	0.0273812	0.0182465	0.00588007	0.0442692	0.0245756	0.0107406	0.00848494	0.00841652	0.0451429	0.0115828	0.00374175	0.0155388	0.00917314	0.01458	0.00593147	0.00302861	0.00833208	0.00530222	0.00344215	0.00223231
0	0.00178229	0.00237202	0.00285059	0.00416979	0.00231412	0.0125071	0.0117956	0.00992736	0.00971509	0.0108822	0.0186864	0.00702396	0.0231633	0.0238154	0.0142444	0.0112604	0.00826432	0.0100689	0.0540615	0.0932165	0.0483472	0.0200487	0.0232276	0.20004	0.0422812	0.0356168	0.0168919	0.00869163	0.0502391	0.0262562	0.014416	0.0128562	0.0129828	0.0453431	0.0146543	0.00621976	0.0188563	0.0113878	0.0164593	0.00790737	0.00432228	0.0112869	0.00821314	0.00644275	0.00488966
0	0.00369492	0.00443868	0.00449564	0.00623458	0.00416579	0.0161631	0.0108401	0.0122901	0.011298	0.014634	0.0177848	0.00856204	0.0224834	0.0269355	0.00887785	0.0132822	0.00730068	0.0118923	0.0471191	0.134743	0.0160065	0.0118471	0.0195028	0.179523	0.0261308	0.0182694	0.0147457	0.00866337	0.0415424	0.0417441	0.00802083	0.00754986	0.00721168	0.0623084	0.0129317	0.0120583	0.0184901	0.0172859	0.0262591	0.00897162	0.0102223	0.0111997	0.0126568	0.0110703	0.00855269
0	0.00487818	0.00590764	0.00645016	0.008128	0.0060284	0.0205681	0.0141293	0.016173	0.0147151	0.0185683	0.0215694	0.0109967	0.0285182	0.0312237	0.012084	0.0156982	0.00915507	0.013505	0.0523046	0.135037	0.0199631	0.0143677	0.0214263	0.166599	0.0262467	0.0187042	0.0155587	0.00991428	0.0332389	0.0350678	0.00928959	0.00884309	0.00842032	0.0459375	0.0128658	0.0122126	0.0140561	0.0142406	0.017701	0.0083131	0.00867774	0.00812043	0.00924148	0.00844178	0.00691359
0	0.00453324	0.00529771	0.0054791	0.00708719	0.00555562	0.0154781	0.0141087	0.0135722	0.0123417	0.0151579	0.0222714	0.00993271	0.025654	0.0251177	0.0115901	0.0141613	0.0101399	0.0125326	0.0485889	0.108055	0.0339485	0.0156496	0.0206149	0.159771	0.0274185	0.0240476	0.0163314	0.011046	0.0347315	0.0348854	0.0132228	0.0112222	0.0107997	0.0530617	0.0145539	0.0141269	0.0169318	0.016088	0.0229049	0.00981726	0.0104535	0.0100261	0.0123878	0.0107433	0.00856106
0	0.00318525	0.00353748	0.00392469	0.00512717	0.00362907	0.0135543	0.00961438	0.0109177	0.009881	0.0143228	0.0168978	0.00849486	0.0227602	0.0229004	0.00972741	0.0137069	0.00783253	0.012606	0.0472477	0.116336	0.0214829	0.0135681	0.0230877	0.179248	0.0273327	0.0206638	0.01691	0.0109052	0.0390348	0.0421028	0.010795	0.0101292	0.00959598	0.0640271	0.0154906	0.015427	0.0180632	0.0183429	0.0268383	0.00961098	0.0110191	0.00976029	0.0125907	0.0102574	0.0075126
0	0.00245374	0.00286815	0.00293166	0.00388911	0.00366397	0.00962834	0.00762021	0.0097671	0.0110915	0.0144364	0.0139383	0.00716411	0.0311461	0.0242907	0.0210431	0.0128249	0.00646901	0.010276	0.0465058	0.141079	0.0372401	0.0143191	0.0248861	0.168839	0.0346288	0.0179615	0.0218754	0.00874443	0.0427635	0.0491306	0.0084307	0.00835376	0.00729855	0.0626205	0.0117892	0.0088256	0.0137304	0.0169272	0.0224452	0.00703104	0.00557434	0.00657905	0.00678928	0.00542371	0.0047057
0	0.00604534	0.00644926	0.00616334	0.00693974	0.00807704	0.0142002	0.0125861	0.0141921	0.0160855	0.0161118	0.0176482	0.0100108	0.0326808	0.0264839	0.0236655	0.0132937	0.00954318	0.0123475	0.0417287	0.127003	0.039132	0.0172993	0.0200519	0.139978	0.0352146	0.0194025	0.0196389	0.0122543	0.0374219	0.0390169	0.0117592	0.0114148	0.010562	0.0444886	0.0148874	0.0117587	0.0144799	0.0153706	0.0170119	0.0092859	0.00813618	0.00836895	0.00815238	0.00723899	0.00641861
0	0.00337971	0.00406862	0.00425697	0.00635422	0.00388584	0.0161125	0.0125405	0.013742	0.013828	0.016473	0.0180247	0.00799609	0.0369658	0.0268473	0.0234233	0.0127804	0.00713275	0.00997793	0.048167	0.143051	0.0502572	0.0152135	0.0206661	0.160231	0.0337601	0.0175106	0.0181755	0.00828418	0.0364614	0.0373428	0.00955389	0.00801777	0.00730379	0.0468492	0.0102188	0.00788935	0.0119506	0.0144201	0.018752	0.00605615	0.00511709	0.00645142	0.0086573	0.00677223	0.00507981
0	0.00363967	0.00453448	0.00435274	0.00574185	0.00514544	0.013311	0.0128351	0.011968	0.0126355	0.0147657	0.0191607	0.00845866	0.0374789	0.024371	0.0230853	0.0125543	0.00906715	0.0106469	0.051175	0.131416	0.064781	0.0167733	0.0200384	0.156082	0.0347402	0.0216171	0.0177873	0.0093537	0.0346656	0.0314809	0.0119224	0.00972315	0.00883748	0.0406391	0.0109881	0.00895089	0.0120279	0.0126542	0.0161116	0.00723245	0.00644457	0.00745853	0.00879989	0.00791345	0.00663334
0	0.00739092	0.00847052	0.00796153	0.00803854	0.0101984	0.015042	0.0124609	0.0113753	0.0108139	0.0192399	0.0140768	0.0110329	0.0324206	0.0133954	0.0128755	0.0186507	0.0127641	0.0126751	0.0343781	0.0761698	0.0406904	0.0141206	0.0304943	0.115785	0.0399704	0.0157017	0.0317736	0.0207713	0.0384632	0.0328187	0.0131428	0.0141902	0.0128809	0.0491772	0.0167388	0.0142102	0.0182841	0.0181207	0.0257885	0.0132996	0.0132349	0.0140032	0.0165805	0.0163467	0.0139822
0	0.00470934	0.00611853	0.00534953	0.00603355	0.00598708	0.0161386	0.0120607	0.00923181	0.00768966	0.0214337	0.0143507	0.0076744	0.0445141	0.0123316	0.0106712	0.0172088	0.00928317	0.00994415	0.0429194	0.100454	0.0521087	0.0115393	0.0301969	0.150546	0.0474688	0.0127778	0.030118	0.0184435	0.0434789	0.031944	0.00960086	0.0102782	0.00897705	0.0489022	0.0123753	0.00971744	0.0147323	0.0133091	0.0212155	0.00796223	0.00849007	0.00944833	0.0123568	0.0113243	0.0085841
0	0.00413558	0.00433802	0.00403716	0.00470208	0.00426449	0.0131061	0.0108428	0.00854396	0.00605439	0.021069	0.0161498	0.00690732	0.0455371	0.0115254	0.0104554	0.0184229	0.00998633	0.0104626	0.0462397	0.103018	0.0567357	0.0122607	0.0355451	0.153572	0.0473068	0.0145761	0.0334455	0.0188959	0.0417817	0.0327057	0.0111506	0.0119765	0.0105564	0.0475281	0.0131836	0.0103491	0.0141732	0.0131654	0.0189788	0.00732702	0.00720944	0.00762293	0.00910944	0.00663361	0.00441221
0	0.00282612	0.00339527	0.00296926	0.00357017	0.00325051	0.010181	0.00753671	0.00577145	0.00453399	0.0166691	0.0119792	0.00572126	0.0392409	0.00949624	0.00889484	0.0163877	0.00896915	0.0094193	0.0454772	0.104409	0.0578569	0.0105039	0.033184	0.177237	0.0517912	0.0131623	0.0327341	0.0193237	0.0471484	0.0352237	0.00990149	0.0108017	0.00945354	0.0537506	0.0126433	0.00972698	0.0146435	0.012937	0.0210652	0.00686309	0.00708291	0.00801983	0.0110684	0.00782951	0.00534956
0	0.00364098	0.00386951	0.00398847	0.00471124	0.00493119	0.0146961	0.00919286	0.0079271	0.00708904	0.0120397	0.0109704	0.00788265	0.030404	0.0115271	0.00803638	0.0116683	0.0075765	0.00977179	0.0488498	0.0765625	0.0193982	0.0111681	0.0183046	0.263317	0.037902	0.0132876	0.0156274	0.0121556	0.048551	0.0229885	0.0105963	0.0104225	0.00953487	0.0666268	0.0139804	0.0112207	0.0156696	0.0135266	0.0235774	0.00926989	0.011348	0.0103004	0.0131011	0.01217	0.0106197
0	0.00455873	0.00503292	0.00514844	0.00606582	0.00668215	0.0157361	0.0109168	0.00976948	0.00882464	0.0140487	0.0131941	0.00977954	0.0335797	0.0129845	0.00960962	0.0137567	0.00971127	0.0120798	0.0510027	0.0748163	0.0197752	0.0125181	0.0201948	0.242622	0.0339601	0.0139818	0.0159818	0.0127792	0.0398677	0.0218167	0.0110345	0.0111236	0.0105918	0.0584455	0.014885	0.0119283	0.0155146	0.0138471	0.0231546	0.0102281	0.0115088	0.0110156	0.0131569	0.0120918	0.0106788
0	0.0016151	0.00188644	0.0021271	0.0027553	0.00245006	0.01239	0.0078182	0.00587309	0.00479367	0.0114141	0.0114821	0.00624369	0.0305575	0.00984308	0.0067103	0.0111955	0.00697937	0.00922903	0.0521346	0.0837122	0.0205665	0.00943982	0.0203001	0.296288	0.0353951	0.0141393	0.015298	0.0113166	0.0467564	0.0240275	0.0098236	0.00947072	0.00866788	0.0733419	0.0123213	0.00852294	0.0138255	0.0114944	0.0254928	0.00677023	0.00858634	0.00797955	0.0125283	0.00961684	0.00682012
0	0.000754363	0.00113575	0.00105643	0.00163111	0.00114953	0.00973991	0.00642666	0.00398815	0.00334073	0.00854739	0.0090919	0.00430759	0.0303782	0.00811409	0.00478748	0.00866242	0.00503787	0.00650907	0.0562144	0.0880856	0.0253169	0.00857538	0.0165958	0.333837	0.0394936	0.0160807	0.0135839	0.00887519	0.0538404	0.0224708	0.00780483	0.00738385	0.00619826	0.0783935	0.00953315	0.00666421	0.0122145	0.00947716	0.0237151	0.00482534	0.00709541	0.00609645	0.0100997	0.00753996	0.0053305
0	0.00226956	0.00332095	0.00285634	0.00401669	0.00289326	0.0112016	0.00701117	0.00669663	0.00586173	0.0108944	0.0117058	0.0068332	0.0209517	0.0138195	0.00943566	0.0113349	0.00614682	0.00913982	0.0505438	0.125301	0.0205071	0.0107168	0.0199947	0.289565	0.034141	0.0132764	0.0137135	0.00833688	0.0358329	0.0287668	0.0067187	0.00663396	0.00595589	0.0666236	0.00984881	0.00788554	0.0121689	0.0126921	0.0265665	0.00650245	0.00623607	0.006925	0.0143248	0.00968684	0.00414498
0	0.00312982	0.00453116	0.00394053	0.00526364	0.00417589	0.0141993	0.0093676	0.00923268	0.0078575	0.0134395	0.0143154	0.00832053	0.0251447	0.0161487	0.0110535	0.0128446	0.00741897	0.0103633	0.053683	0.126161	0.0217116	0.0115959	0.0191937	0.275392	0.0328336	0.012838	0.0129414	0.00840404	0.0329416	0.0251363	0.00704101	0.00686166	0.006313	0.0557876	0.0095562	0.00785551	0.0114831	0.0115135	0.0219584	0.00662667	0.00629281	0.00706306	0.0134955	0.00957219	0.00499975
0	0.00133103	0.00240951	0.00166046	0.00283212	0.00155685	0.00871143	0.0110962	0.00625315	0.00527146	0.00798173	0.0170514	0.00488402	0.0227436	0.0123655	0.00829151	0.00722976	0.00664485	0.00689363	0.0528364	0.0944849	0.0474793	0.0122708	0.0120068	0.26724	0.0358658	0.0328416	0.0120527	0.00890911	0.0425906	0.0269222	0.0116692	0.00936353	0.00841882	0.0742035	0.0102702	0.00723103	0.0134206	0.0112915	0.0280011	0.00574752	0.00490142	0.0061498	0.0121945	0.0109588	0.00547038
0	0.00155017	0.00240013	0.00199535	0.00327074	0.00144799	0.0103593	0.00865743	0.00657304	0.00485564	0.0104536	0.0141026	0.00498664	0.0199892	0.0110983	0.00688241	0.00882815	0.00535115	0.00630075	0.0469113	0.0974173	0.0313382	0.00980752	0.0167694	0.274594	0.0328568	0.019844	0.0149972	0.00757069	0.043775	0.0330392	0.00932085	0.00697359	0.00613401	0.0919702	0.0101582	0.00660821	0.014214	0.0143908	0.0352369	0.00593219	0.00534564	0.00638818	0.0131435	0.0113487	0.00481195
0	0.0130728	0.0122176	0.0125474	0.0116136	0.0145749	0.0256085	0.0177001	0.0155679	0.0139102	0.027714	0.0197058	0.0149537	0.0205807	0.0158983	0.0167731	0.0278418	0.0147338	0.0159551	0.0350243	0.0356004	0.0257147	0.0166588	0.0369612	0.128349	0.0335395	0.0161568	0.0390754	0.0184644	0.0319007	0.0165328	0.0149567	0.0163453	0.0151381	0.0347246	0.0186259	0.0164268	0.0182597	0.0170598	0.0188264	0.0138996	0.0140934	0.0135294	0.0147059	0.0149088	0.0135523
0	0.0114161	0.0122462	0.0119336	0.011573	0.0151593	0.0253178	0.0181629	0.017015	0.0153483	0.0277637	0.0199226	0.0156804	0.0216078	0.017113	0.0172724	0.0276804	0.0158038	0.0168391	0.031912	0.0327112	0.0239217	0.0168749	0.0366312	0.100883	0.0298092	0.0177032	0.0379734	0.0193876	0.0303464	0.0181977	0.0162977	0.0173821	0.016623	0.0350905	0.0205507	0.0189822	0.0204407	0.0197166	0.0217008	0.01645	0.0165311	0.0160194	0.0172735	0.0171628	0.015572
0	0.00417957	0.00675029	0.00530494	0.00550359	0.00461075	0.0247726	0.0220049	0.00957326	0.00741364	0.0293987	0.0313403	0.00742549	0.0291275	0.0128857	0.0122049	0.0270711	0.0145225	0.00938438	0.0560231	0.0437942	0.0367968	0.012801	0.0385314	0.203829	0.0407562	0.0217093	0.0406087	0.0160497	0.041515	0.0123105	0.0104644	0.0134047	0.0113204	0.0405678	0.0124654	0.00987531	0.0131131	0.00949343	0.01398	0.00615611	0.00632052	0.00679128	0.00789728	0.00581959	0.00413133
0	0.0103366	0.00933418	0.00935925	0.00920534	0.0092254	0.0236759	0.0189642	0.0124592	0.00955379	0.0260207	0.023904	0.0101262	0.0171637	0.0127633	0.0119479	0.0264607	0.014911	0.0122995	0.0377656	0.0351809	0.0274698	0.0128263	0.0379143	0.163089	0.0374938	0.019733	0.0432243	0.0199557	0.0383157	0.0160824	0.0151825	0.0172999	0.0155673	0.0444165	0.0188244	0.0150834	0.0175902	0.0140506	0.0196924	0.0109456	0.0108715	0.0107497	0.0127122	0.0114809	0.00877166
0	0.00363681	0.00418539	0.00415189	0.00539678	0.00463697	0.0114361	0.00878464	0.0103014	0.00740608	0.0117909	0.013994	0.00773313	0.0204383	0.0217776	0.0131952	0.0142102	0.00824278	0.0123005	0.0498338	0.162665	0.0287435	0.0134553	0.0260447	0.214136	0.0335348	0.0166685	0.0148643	0.0093552	0.0316139	0.0398216	0.00852503	0.00846118	0.00784989	0.0441078	0.0112951	0.0086274	0.0115299	0.0171843	0.0179389	0.0070213	0.00615941	0.00700117	0.00970118	0.00600841	0.00423301
0	0.0038425	0.00405451	0.00399467	0.00491295	0.00469672	0.0105382	0.00820876	0.00931287	0.00714373	0.0109372	0.013048	0.00746768	0.0169118	0.0187523	0.0118635	0.0124857	0.00820475	0.0115624	0.0443705	0.150702	0.0260758	0.0131146	0.0249619	0.212881	0.0324732	0.0175331	0.0155408	0.0104402	0.0334966	0.0441297	0.00983201	0.0097857	0.00883523	0.0491847	0.0128585	0.0107205	0.0135762	0.0194389	0.0214503	0.00862194	0.00784455	0.00854423	0.0118733	0.00792054	0.00585615
0	0.000898733	0.00135191	0.00129658	0.00245165	0.00114732	0.00726601	0.00669628	0.00612036	0.00380365	0.00806415	0.0133071	0.0040088	0.0170233	0.0150848	0.00822076	0.00833013	0.00581715	0.00751928	0.0496887	0.137683	0.0461842	0.0107077	0.0206167	0.236584	0.0365343	0.0217659	0.0151136	0.00668429	0.0461135	0.0570376	0.0120858	0.00673654	0.0062436	0.0719717	0.00899659	0.00463026	0.0122031	0.0220295	0.0253553	0.00428563	0.00285019	0.00459366	0.0079937	0.00437407	0.00252874
0	0.00144593	0.00202062	0.00199789	0.00363892	0.00142937	0.00893652	0.0089614	0.00771409	0.0045873	0.00758584	0.0144817	0.00430202	0.0161051	0.0162084	0.00844964	0.00748835	0.00535447	0.0071044	0.0451038	0.132595	0.0482765	0.0114267	0.0138675	0.22893	0.0364348	0.0248032	0.0134759	0.00710407	0.0471791	0.0527311	0.0140339	0.00861525	0.00863964	0.066842	0.00958755	0.00559726	0.013	0.020137	0.0248004	0.00458644	0.00319116	0.00594195	0.0113546	0.00836231	0.00557075
0	0.00410617	0.00682589	0.00500746	0.00449834	0.00550334	0.0166086	0.00801366	0.00715069	0.00659984	0.0208941	0.0107525	0.00790823	0.0193959	0.0102066	0.0109745	0.021477	0.00797999	0.0103835	0.0345465	0.0663495	0.0275453	0.0120943	0.0353131	0.242651	0.0422891	0.0129996	0.02788	0.0161344	0.0396129	0.0185173	0.0119794	0.0121423	0.0105775	0.054369	0.0152073	0.0170423	0.015557	0.0130861	0.0222172	0.010342	0.0115519	0.0106885	0.0149996	0.0114371	0.00858272
0	0.00385719	0.0075408	0.00534754	0.00464467	0.00514747	0.0207573	0.00857021	0.00775912	0.00686822	0.0248971	0.0110137	0.00781106	0.0208144	0.0111196	0.0115561	0.023284	0.00753076	0.0103996	0.0352024	0.074954	0.0278211	0.0121079	0.0358262	0.241613	0.0415547	0.0126561	0.0278977	0.0152645	0.0376954	0.0177619	0.0111847	0.0113846	0.00963505	0.0502756	0.0139209	0.0162696	0.0147096	0.0122046	0.0202301	0.00941643	0.0107223	0.00974457	0.0130693	0.0103208	0.00763779
0	0.0023498	0.00548188	0.00312425	0.00240877	0.00266689	0.0217802	0.00813239	0.00602671	0.00457882	0.0300099	0.013517	0.00689604	0.0222424	0.00934846	0.00973926	0.0233308	0.00724374	0.00955988	0.038613	0.0798436	0.030739	0.00999916	0.037226	0.266009	0.040747	0.0129147	0.0325745	0.0142448	0.0414322	0.0179466	0.00855228	0.0101262	0.00814698	0.0613105	0.0104885	0.0134558	0.0120956	0.00824344	0.0194994	0.0056759	0.00678087	0.00574581	0.00881856	0.00617916	0.00415484
0	0.00218533	0.00417393	0.00249238	0.00195437	0.00207177	0.0148833	0.0062566	0.00434295	0.00355463	0.0193996	0.00989856	0.00496008	0.017347	0.00733072	0.0077275	0.0178374	0.00584551	0.00765881	0.0329211	0.0676267	0.0279547	0.00896794	0.0318533	0.269326	0.0432696	0.0137642	0.0328926	0.0166848	0.0514916	0.0210873	0.00966395	0.0112882	0.00894207	0.0793255	0.0127854	0.0175627	0.0154337	0.0103948	0.0264936	0.0068093	0.0092417	0.00779335	0.0123914	0.00809587	0.00601852
0	0.00740591	0.00876933	0.00851969	0.00828697	0.00979437	0.0216339	0.0125834	0.0131276	0.0107049	0.0189458	0.0165596	0.0114537	0.0165668	0.0155385	0.0127434	0.0211712	0.0119362	0.0129245	0.0284593	0.0659005	0.0207416	0.0147974	0.0356862	0.115372	0.0346397	0.0175714	0.0409602	0.0236609	0.0408953	0.0299367	0.0160468	0.0136314	0.0128614	0.0488631	0.0194785	0.0180509	0.0211753	0.0198279	0.0268354	0.0137735	0.0147144	0.0145564	0.0182204	0.0185423	0.0161351
0	0.00353451	0.00491254	0.00430537	0.00411515	0.00439502	0.0183514	0.00794303	0.00802725	0.00552535	0.0174452	0.0144741	0.00645256	0.0142311	0.0116202	0.00831272	0.0216991	0.00769559	0.00924971	0.033718	0.0835404	0.0213028	0.0107143	0.0456285	0.181914	0.0420669	0.0136863	0.0547156	0.0253125	0.0511684	0.0300443	0.0125214	0.00910348	0.00792693	0.0622592	0.014382	0.013374	0.0178237	0.0144093	0.0253672	0.00776004	0.00862771	0.00876098	0.0130118	0.0107226	0.00784739
0	0.00322779	0.00532484	0.0043156	0.00459186	0.00429357	0.0188722	0.0140138	0.00921857	0.00673179	0.0170005	0.0227648	0.00778185	0.0183186	0.0149247	0.00942251	0.0211037	0.0130065	0.0110897	0.039931	0.0820186	0.0430979	0.0140856	0.0374259	0.165825	0.041321	0.0236032	0.0400888	0.0231346	0.0429246	0.025451	0.0170981	0.0153948	0.0129439	0.0469939	0.0154007	0.0125208	0.0145755	0.0119791	0.018609	0.00728546	0.00662522	0.00748059	0.0113483	0.00984072	0.0069941
0	0.00123506	0.00261366	0.00210018	0.00215242	0.00230119	0.0139583	0.00763365	0.00633386	0.00406142	0.0163415	0.0176591	0.00578671	0.0151301	0.0122603	0.00785557	0.0243198	0.0100668	0.00957758	0.0401948	0.100001	0.0340796	0.0114957	0.0489559	0.195279	0.0416779	0.0167114	0.0511988	0.0225854	0.0456088	0.0286182	0.0133545	0.0107507	0.00878517	0.0531066	0.0127557	0.0109409	0.0145954	0.0119854	0.0218304	0.00591879	0.00627837	0.00666242	0.0111665	0.00850957	0.00556566
0	0.00169112	0.00297234	0.0020726	0.00298068	0.00206742	0.0141438	0.00769879	0.00637974	0.00540931	0.0180239	0.0127295	0.00592566	0.0302716	0.0117566	0.0213492	0.0147059	0.00644686	0.00841471	0.0528057	0.113829	0.0540662	0.0110086	0.0278424	0.226779	0.0470371	0.011108	0.0243939	0.0153952	0.0435332	0.0248495	0.00732437	0.00608359	0.00523337	0.0620185	0.0107623	0.00767885	0.0117508	0.00876686	0.0199303	0.00538819	0.005249	0.00634764	0.00736895	0.00505241	0.00335677
0	0.00253375	0.00406765	0.0029444	0.00392122	0.00320959	0.0152709	0.00890801	0.00732638	0.00623278	0.0180571	0.0135524	0.00679188	0.0300402	0.0116662	0.0203704	0.0139457	0.00697092	0.00855683	0.0500798	0.102882	0.052174	0.0111976	0.0247518	0.222502	0.0460552	0.0111804	0.0231202	0.0158198	0.0439419	0.0239576	0.00789278	0.00673697	0.00595294	0.0611426	0.0117892	0.00882731	0.0129712	0.00973199	0.0208065	0.00677112	0.00667307	0.00764678	0.00900694	0.00691759	0.00510447
0	0.000854479	0.00182708	0.00113969	0.00169305	0.00118142	0.00923815	0.00550055	0.00419108	0.00329201	0.0138428	0.0104633	0.00466062	0.0237406	0.00883269	0.0156387	0.0122568	0.00612176	0.00743413	0.0473184	0.101013	0.0524177	0.0100007	0.0277377	0.254142	0.0465491	0.0127582	0.0255026	0.0168459	0.046583	0.0272346	0.00843297	0.00728449	0.00591015	0.0748226	0.0118727	0.00821513	0.0133114	0.00986762	0.02507	0.00575732	0.00570839	0.0069652	0.00850218	0.00528305	0.00298479
0	0.0011757	0.00236815	0.00143798	0.00232002	0.00139671	0.0114588	0.0078108	0.00501552	0.00410403	0.0156737	0.0134524	0.0050535	0.0266361	0.00979904	0.0168914	0.0127209	0.00728138	0.00759168	0.0486402	0.0986437	0.0594213	0.0111987	0.0264489	0.238383	0.0450376	0.0166289	0.024274	0.0158676	0.0440443	0.0256882	0.0101099	0.00836202	0.00690192	0.0681683	0.0118437	0.00810532	0.0126261	0.00930985	0.0234149	0.00571797	0.00557154	0.00679129	0.00830253	0.00521592	0.00309443
0	0.00237322	0.00407205	0.00313085	0.00449862	0.00329222	0.0132722	0.00987039	0.00704931	0.00586368	0.0111401	0.0133211	0.00713467	0.0258265	0.0113192	0.00440954	0.0113071	0.00609135	0.00898062	0.0578394	0.0734949	0.0122466	0.00727477	0.0153071	0.397566	0.0294194	0.00976258	0.0133561	0.00956891	0.0282611	0.0138703	0.00873883	0.00785564	0.0071995	0.0580353	0.00996576	0.00741076	0.00984177	0.00850725	0.0182734	0.00615952	0.00635479	0.00626875	0.012624	0.00759616	0.0042485
0	0.00232144	0.0036732	0.00280303	0.00414483	0.00331557	0.0135159	0.00951247	0.00729584	0.00623493	0.0112503	0.0122716	0.00730993	0.0256687	0.0112117	0.00470252	0.0117725	0.00624027	0.00920295	0.0575696	0.071509	0.0121223	0.0071399	0.0167031	0.413466	0.0271479	0.0101842	0.0139439	0.00949261	0.0248222	0.0133002	0.00868798	0.00793219	0.00753882	0.0540424	0.00982738	0.00726187	0.00911217	0.00831842	0.0167795	0.00607845	0.00610314	0.00593706	0.0111527	0.00680418	0.00457474
0	0.00106054	0.00221563	0.00146802	0.00253161	0.00142149	0.0108647	0.00755453	0.00499092	0.00371231	0.00906737	0.011275	0.00537224	0.0192006	0.00806139	0.00245534	0.0082814	0.004213	0.00642614	0.0481245	0.0627163	0.00977603	0.00492091	0.0128753	0.430343	0.0258383	0.00915929	0.0137875	0.00802446	0.0340959	0.0161183	0.00603746	0.00645603	0.00569028	0.0890159	0.00828234	0.00557654	0.00969027	0.0078624	0.0282759	0.00471483	0.00543608	0.00506986	0.0155955	0.00993269	0.00641222
0	0.000816749	0.00227399	0.00122539	0.0025148	0.00119062	0.0111265	0.0104779	0.00504154	0.00372126	0.00890862	0.0150493	0.00514494	0.0249662	0.00853423	0.00257825	0.00779491	0.00484427	0.00625789	0.0594752	0.0636876	0.0160442	0.0056956	0.0115836	0.428985	0.0291808	0.0166197	0.0122169	0.00779313	0.0349105	0.0132287	0.00645794	0.00653355	0.00576903	0.0751621	0.00737399	0.00459572	0.00814708	0.00570805	0.0209268	0.00352037	0.00380406	0.00406192	0.0126006	0.00828374	0.00516631
0	0.00489154	0.00807365	0.00571305	0.00743996	0.0057683	0.026402	0.0186056	0.0110111	0.0115972	0.0222196	0.0203641	0.00864156	0.0483253	0.0176488	0.0146756	0.018328	0.00912154	0.0103265	0.0633721	0.0591881	0.0324466	0.0122789	0.0233007	0.187519	0.0366823	0.0135342	0.0215641	0.0153295	0.038009	0.0178916	0.0120517	0.0109527	0.0105103	0.0390755	0.01556	0.0128683	0.0165983	0.0154142	0.0157954	0.00991393	0.0106018	0.010411	0.0115514	0.0106172	0.00780851
0	0.00306646	0.00516973	0.0034954	0.0050237	0.00331454	0.0194781	0.0134817	0.00757046	0.00820167	0.0175024	0.0157885	0.00622244	0.0419131	0.0137979	0.0116514	0.0151983	0.00637892	0.00776652	0.063479	0.0584294	0.0325289	0.0100581	0.022352	0.223584	0.0417025	0.0114708	0.0221132	0.0152894	0.0473281	0.018552	0.0109115	0.00977227	0.00882412	0.0515749	0.0148801	0.0127703	0.0189457	0.0172276	0.0188551	0.00910536	0.0109006	0.0110911	0.0138664	0.011905	0.00746123
0	0.00225302	0.00462336	0.00258908	0.00389849	0.00194764	0.0167409	0.011418	0.00623654	0.00578436	0.0158881	0.0140292	0.00505393	0.0354079	0.0104548	0.00873284	0.0133673	0.00524882	0.00647606	0.0586273	0.0574343	0.0294717	0.00848163	0.0219615	0.255295	0.0389911	0.0115759	0.0216045	0.0146212	0.050168	0.0210485	0.00921345	0.00882578	0.00776499	0.0652461	0.0135287	0.0117814	0.0195418	0.0179075	0.0234556	0.00781491	0.0115728	0.01112	0.0153736	0.0115829	0.00583894
0	0.00321104	0.0064292	0.0034848	0.00552734	0.00285504	0.0229822	0.0190157	0.00856371	0.00889121	0.0189459	0.0204347	0.00637101	0.0452428	0.0146804	0.0128928	0.01498	0.00823352	0.00793295	0.063438	0.0586183	0.0409624	0.0122197	0.0215508	0.209199	0.0408929	0.0189099	0.0209619	0.015757	0.0452566	0.018812	0.0119056	0.0119566	0.0116371	0.045188	0.0149018	0.0123278	0.0164917	0.0144032	0.0153047	0.00786231	0.00876822	0.00875352	0.0101182	0.00805867	0.00506929
0	0.00267713	0.00400629	0.0035427	0.00429877	0.00343981	0.0219684	0.0111117	0.00846197	0.00645044	0.0182791	0.0153706	0.00691255	0.0340585	0.0121261	0.0154293	0.0165136	0.00662158	0.00882219	0.0667603	0.0703403	0.0356998	0.0116606	0.025078	0.26039	0.0417826	0.011901	0.0239566	0.0127769	0.0408804	0.015605	0.00869867	0.00857621	0.00772788	0.0545773	0.0105589	0.00894094	0.0116789	0.00977774	0.0164196	0.00656282	0.00779696	0.00698282	0.00924593	0.00856825	0.00696494
0	0.00352344	0.00488346	0.004153	0.00492949	0.00475084	0.0213759	0.0112771	0.00913389	0.00730844	0.0181043	0.0154467	0.00784202	0.0333253	0.0125812	0.0162737	0.0172104	0.00770257	0.00941014	0.0632265	0.0655393	0.034933	0.012517	0.0244946	0.246902	0.0407706	0.0120249	0.0237188	0.0132797	0.0399877	0.016122	0.00946699	0.00953516	0.00842671	0.0549827	0.0115804	0.00970611	0.0124689	0.0106566	0.0170306	0.00748984	0.00909065	0.00772434	0.010535	0.0100537	0.00850402
0	0.00104664	0.00231139	0.00170207	0.00236976	0.00139459	0.0165188	0.00984274	0.00597511	0.00400106	0.0148496	0.0149791	0.00501547	0.0298616	0.00985921	0.012162	0.0139967	0.00614829	0.00680709	0.0666824	0.0707495	0.0387055	0.0107219	0.0239837	0.297299	0.0426217	0.0162766	0.0233468	0.0119342	0.0448709	0.0155305	0.00783966	0.00899326	0.00741563	0.0650366	0.00939236	0.00695913	0.010686	0.00798028	0.0181522	0.00430575	0.00590904	0.00508807	0.00912291	0.00670094	0.00485439
0	0.00110981	0.00226422	0.00179324	0.00250111	0.00151215	0.0159213	0.00928362	0.00600658	0.00411924	0.0146842	0.0140498	0.00510038	0.0277157	0.00989089	0.012284	0.0140065	0.00585673	0.00694198	0.0635897	0.0721812	0.0371482	0.01083	0.0243857	0.292362	0.0421056	0.0154866	0.0238345	0.0121931	0.0459974	0.016512	0.00809317	0.00894779	0.00747283	0.0680355	0.00967982	0.00740256	0.0113826	0.0085193	0.0196445	0.00464113	0.00646637	0.00546641	0.00987894	0.00741623	0.00528515
0	0.00320637	0.00388254	0.00363648	0.00473344	0.00487205	0.0126582	0.0114362	0.0089974	0.00981731	0.0145852	0.0151013	0.00858393	0.0487082	0.0160816	0.0107548	0.0132335	0.00854739	0.0112557	0.0690983	0.105572	0.0269455	0.011115	0.0211131	0.214782	0.0341799	0.013305	0.0185698	0.0122986	0.0395058	0.0268167	0.0101806	0.00943267	0.00906677	0.0576213	0.0124825	0.00936418	0.0133055	0.0113428	0.0195579	0.00769343	0.00784682	0.00781637	0.00821144	0.00668246	0.00600186
0	0.00224461	0.00364763	0.0026595	0.00494101	0.00306538	0.0139406	0.0118091	0.00758692	0.00833105	0.0120918	0.0138477	0.00627331	0.0460777	0.0143078	0.00821956	0.0105838	0.00591557	0.00848951	0.0682565	0.116542	0.0246782	0.00834167	0.0163916	0.235234	0.0362371	0.0102021	0.0166283	0.0102546	0.0460734	0.0286789	0.00836699	0.00720684	0.00669912	0.0695526	0.0109173	0.00820771	0.0136864	0.0108273	0.0232378	0.00656881	0.00728049	0.00725855	0.00859948	0.00557833	0.00446137
0	0.0016484	0.00339826	0.00206479	0.0049251	0.00197423	0.0149906	0.0144519	0.00727695	0.00783213	0.0116684	0.0155285	0.00563171	0.0475498	0.0140953	0.00766306	0.00926848	0.00568871	0.00708477	0.0674356	0.11215	0.037607	0.00936378	0.0143733	0.229852	0.0341362	0.0156243	0.0150804	0.00996101	0.0439843	0.0269996	0.00928075	0.00764347	0.00689028	0.0651951	0.00954199	0.00659386	0.0130017	0.0102654	0.0243088	0.00500435	0.00756741	0.00702548	0.0125505	0.00954907	0.00627316
0	0.00214055	0.00336144	0.00256536	0.00458685	0.0028702	0.0129415	0.0122515	0.00734509	0.00782609	0.0117495	0.0142475	0.0062584	0.0430096	0.0139493	0.00838829	0.0102331	0.00646927	0.00856974	0.0650976	0.108435	0.0329174	0.0101755	0.0158114	0.225349	0.0348131	0.015588	0.0158878	0.0113286	0.0437583	0.0279521	0.0101561	0.00874708	0.00792041	0.0633547	0.0112004	0.00817728	0.0144282	0.0115678	0.0248726	0.00628048	0.00858302	0.00814052	0.0137512	0.0102379	0.00670545
0	0.00203491	0.00322587	0.0030841	0.00343318	0.00296111	0.0176459	0.00902797	0.00759267	0.00538969	0.0155355	0.0160335	0.00623293	0.0195566	0.0142674	0.010872	0.0154471	0.00711783	0.0101124	0.0503089	0.0945493	0.0225109	0.0101461	0.0259754	0.225254	0.0389177	0.0124474	0.0260612	0.0105879	0.0459927	0.024329	0.00709022	0.00658592	0.00603306	0.0758694	0.0129576	0.00747055	0.017937	0.0116751	0.034493	0.00741689	0.00720282	0.0104206	0.0166928	0.0125821	0.00892132
0	0.00422633	0.00605209	0.00568077	0.00599707	0.00612086	0.0244736	0.0131114	0.0115905	0.00893373	0.020753	0.0193904	0.00944934	0.0234811	0.0179831	0.0134199	0.0188765	0.0105262	0.0131372	0.0513304	0.0938707	0.0239504	0.0122822	0.0280453	0.207326	0.0356903	0.0132761	0.0271081	0.0119978	0.0376824	0.0211661	0.00882397	0.00852309	0.00814912	0.0534019	0.0126917	0.00914274	0.0144625	0.0108712	0.0211184	0.00826703	0.00784921	0.00892137	0.0115195	0.0105695	0.00875941
0	0.00195049	0.0042111	0.00325871	0.00362765	0.00222779	0.0228744	0.0161294	0.00831456	0.00553743	0.0171739	0.0232784	0.00586428	0.0222457	0.014876	0.00925706	0.015214	0.0103896	0.00950378	0.0545125	0.0902006	0.045087	0.0118294	0.0257985	0.235948	0.0379758	0.0250935	0.0239014	0.00992745	0.0389061	0.0177007	0.00913708	0.00878191	0.00764959	0.0595356	0.00988257	0.00532742	0.0123584	0.00740424	0.0223492	0.00505329	0.00457686	0.00678465	0.0124219	0.00982302	0.00609908
0	0.001852	0.0028384	0.00244251	0.00284854	0.00220085	0.0131879	0.00851084	0.00619238	0.00420434	0.0115459	0.0135642	0.00509511	0.0157369	0.010512	0.00775394	0.0126983	0.00715558	0.00878831	0.0452532	0.0789598	0.0290426	0.0104616	0.0254176	0.242726	0.0398437	0.0174935	0.0267703	0.0116402	0.0493895	0.0242192	0.00961931	0.0088565	0.0082592	0.0851042	0.013886	0.00766756	0.0186121	0.0114368	0.0373133	0.00713879	0.0069568	0.0103668	0.0173349	0.0118951	0.00720718
0	0.00437118	0.00492389	0.00483814	0.005212	0.00595656	0.0115705	0.00930404	0.00911524	0.00779485	0.013071	0.013807	0.00763202	0.0206807	0.0136132	0.00954333	0.0125037	0.00892858	0.0102981	0.0392279	0.0772451	0.024192	0.0127391	0.0207987	0.172884	0.0453166	0.0161361	0.0248376	0.0146064	0.0491158	0.0310906	0.0148252	0.0123296	0.0119017	0.066792	0.0238019	0.0139764	0.0244044	0.0192924	0.0298431	0.0153852	0.0112428	0.0160819	0.0154916	0.012857	0.0104205
0	0.00421467	0.00478495	0.00445876	0.00493048	0.00510951	0.0135805	0.0101442	0.00963334	0.00809815	0.0164579	0.0169953	0.00749505	0.0281031	0.0161767	0.010501	0.0148552	0.00878746	0.0103806	0.0496174	0.0935096	0.0289764	0.012856	0.0234093	0.181402	0.0480918	0.0150835	0.0243755	0.0124261	0.0480665	0.0283887	0.0125537	0.0102195	0.00974934	0.0591651	0.0198475	0.0106281	0.0199338	0.0151246	0.0240293	0.0115788	0.00801599	0.0122662	0.0112999	0.00848655	0.00619218
0	0.0035859	0.00454707	0.00447409	0.00478149	0.0044117	0.0142444	0.0120338	0.0100269	0.00827156	0.0171528	0.0207155	0.00789816	0.0300306	0.0175657	0.0107156	0.0153941	0.00952437	0.0102306	0.0504204	0.0982133	0.0362351	0.0141349	0.0214584	0.186924	0.0443087	0.0174818	0.0219002	0.012264	0.0406099	0.0259284	0.0143804	0.0119745	0.0118719	0.0529589	0.0187905	0.0100358	0.0178794	0.01433	0.0207464	0.0101334	0.00715523	0.0105794	0.0102623	0.00785594	0.00556294
0	0.00210847	0.00305451	0.00263182	0.00337853	0.00274494	0.0115634	0.0100743	0.00745264	0.00637633	0.0147398	0.018288	0.00592809	0.028386	0.0144973	0.00866312	0.0125081	0.00862165	0.00876635	0.0524294	0.0931404	0.0388828	0.0122235	0.0215349	0.204336	0.0474334	0.018401	0.0218584	0.0115456	0.0467894	0.0277695	0.0142575	0.0108684	0.0100264	0.0629728	0.0191227	0.00924004	0.0192025	0.0136498	0.0244481	0.0103435	0.00660322	0.0110945	0.0103169	0.00712479	0.0046008
0	0.00408365	0.00579614	0.00466152	0.00502403	0.00529763	0.0185881	0.0126462	0.0103682	0.00821057	0.0231834	0.0208198	0.00831128	0.0233819	0.0148371	0.0153528	0.0181824	0.00825951	0.0106946	0.0434937	0.110971	0.0348045	0.0112626	0.0282695	0.241242	0.039418	0.0113406	0.0274284	0.00935459	0.0353488	0.0280556	0.00714962	0.00802608	0.00700566	0.0553617	0.00964356	0.00694219	0.00915606	0.0104644	0.0170737	0.00544685	0.00520951	0.00512471	0.00612231	0.00466679	0.0039188
0	0.00402989	0.00572641	0.00457477	0.00487586	0.00528964	0.0165382	0.0115007	0.00943705	0.00740863	0.0209688	0.0193992	0.00805307	0.0232786	0.0132227	0.0149443	0.0166155	0.00794586	0.0100646	0.0437548	0.0962996	0.0368394	0.0118066	0.0268228	0.233774	0.0439764	0.012015	0.0259991	0.0102988	0.0397059	0.0296034	0.00817683	0.00850997	0.00774364	0.0635228	0.011487	0.00787032	0.0108907	0.0116251	0.0207647	0.00622944	0.00601868	0.00576551	0.0068921	0.00524792	0.00448554
0	0.00129197	0.0018522	0.001855	0.00317024	0.00179416	0.00978057	0.00686416	0.00858098	0.00558144	0.0105418	0.0133336	0.00626379	0.025997	0.0185899	0.0129123	0.00918347	0.00518871	0.00930507	0.0536323	0.17023	0.0324853	0.0135167	0.0165653	0.209251	0.0408222	0.0197362	0.0132731	0.00743052	0.0663398	0.050722	0.00548492	0.00518815	0.00476913	0.0502188	0.00853228	0.00515709	0.0130255	0.0150601	0.0166592	0.00437738	0.00351346	0.00659865	0.00687107	0.00487332	0.00358068
0	0.00151885	0.00192019	0.00187536	0.00294576	0.00204898	0.00842124	0.00604961	0.00713399	0.00491395	0.0091678	0.0112427	0.0053189	0.0221202	0.0155183	0.0104386	0.0088802	0.00470036	0.00835859	0.049207	0.157629	0.0299243	0.0116502	0.0179438	0.213709	0.0409998	0.0184167	0.0141263	0.0076959	0.0712839	0.0517439	0.00567423	0.00512758	0.00472353	0.0578291	0.00901666	0.00595786	0.0151778	0.0173508	0.0207429	0.0050007	0.00457753	0.00810195	0.00994342	0.00801005	0.00586256
0	0.00112298	0.00182183	0.00163558	0.00345866	0.00111603	0.0108571	0.00874218	0.00835868	0.00499205	0.010516	0.0142886	0.00509254	0.0266999	0.0155611	0.0100071	0.00784418	0.00463328	0.00654925	0.0503203	0.151887	0.0482131	0.0124825	0.0155381	0.223078	0.0387696	0.0223965	0.0133651	0.0068231	0.0645345	0.0459928	0.0100973	0.00737591	0.00641576	0.0537009	0.00827971	0.0043538	0.0129324	0.0152021	0.0185069	0.00393044	0.00309664	0.0062526	0.0067191	0.00390667	0.00253223
0	0.000953459	0.00125355	0.00134615	0.00230717	0.00108856	0.00822407	0.00548994	0.00651183	0.00382661	0.0094521	0.0111117	0.00482583	0.0219032	0.0143287	0.00938901	0.00847744	0.00408402	0.00740678	0.0481477	0.157012	0.0361515	0.0113172	0.0185268	0.222436	0.0387994	0.019795	0.0147901	0.007133	0.0697124	0.0549272	0.00755957	0.00587746	0.00525354	0.0610655	0.00865711	0.00495102	0.0144584	0.0182933	0.0216838	0.00430659	0.00339778	0.00735664	0.00832417	0.00506454	0.00302269
0	0.00348598	0.00562452	0.00396336	0.00613489	0.00428104	0.0211382	0.0123987	0.00928992	0.0108813	0.0208749	0.0140146	0.00862119	0.041185	0.0187118	0.0200728	0.0179577	0.00767652	0.0101447	0.070093	0.0502949	0.0423972	0.0115553	0.0259956	0.208134	0.0434045	0.0111241	0.0237492	0.0131989	0.0394302	0.0139435	0.0101658	0.0101847	0.00902128	0.0477451	0.0134333	0.0113404	0.0153749	0.0129126	0.0198574	0.00841828	0.00941805	0.00915206	0.0133249	0.0114923	0.00838136
0	0.0030897	0.00463799	0.0035147	0.00531006	0.0038472	0.0159072	0.0100512	0.00776834	0.00878682	0.016185	0.0113888	0.00733721	0.0336208	0.0154114	0.0165726	0.0145091	0.00703991	0.00896327	0.061982	0.0453606	0.0377834	0.0113367	0.0243483	0.211341	0.0437357	0.0127703	0.0251725	0.0144728	0.0450021	0.0160194	0.0115093	0.0120158	0.0108406	0.0603626	0.0153309	0.0133393	0.0190359	0.0145347	0.0267045	0.00976394	0.0111918	0.0114827	0.0173918	0.0139045	0.00932507
0	0.00141202	0.00307038	0.00186993	0.00368156	0.00175308	0.0160939	0.0102211	0.00646068	0.00748687	0.0180643	0.0135148	0.00617212	0.0390982	0.0154295	0.0164357	0.0160861	0.00640762	0.00838773	0.0775033	0.0546799	0.0449678	0.0102274	0.0261505	0.263517	0.0451617	0.0109096	0.0225032	0.0108893	0.0430095	0.0126899	0.00754928	0.0082321	0.00697144	0.0564684	0.0101448	0.00822846	0.0129582	0.00938698	0.0220543	0.0053347	0.00665182	0.00695406	0.0117342	0.0085603	0.00491629
0	0.00162977	0.00372696	0.00213432	0.0042168	0.00172758	0.0183971	0.0118312	0.00721815	0.00850722	0.0176836	0.01428	0.00617973	0.0418023	0.0166111	0.0171212	0.0148128	0.00622822	0.00773965	0.0753591	0.0536189	0.0453591	0.0102877	0.0233752	0.251296	0.0456895	0.0130264	0.0210894	0.0117463	0.0432972	0.0128603	0.00815578	0.00900693	0.00782199	0.0566324	0.0106259	0.00872467	0.0132413	0.00988941	0.0212765	0.00548491	0.00674709	0.00672135	0.0126395	0.00903534	0.00514421
0	0.00165728	0.0024742	0.00290167	0.00481947	0.0029725	0.0169068	0.00967965	0.0148623	0.0109789	0.0163197	0.0209068	0.00846295	0.0221972	0.0374593	0.00650332	0.0147446	0.0060353	0.0120868	0.0650014	0.168762	0.0116398	0.0107088	0.0227719	0.232799	0.0249936	0.0168274	0.0176582	0.00479927	0.0293786	0.0387148	0.00477714	0.00519207	0.00471925	0.0637189	0.00718929	0.00379178	0.00871683	0.0109843	0.016985	0.0034534	0.00287212	0.00338233	0.00366569	0.00255581	0.00197318
0	0.00380153	0.0043972	0.00499754	0.0062497	0.00739562	0.0135196	0.0113471	0.0173832	0.0147036	0.01634	0.023257	0.0116423	0.0202704	0.0471492	0.0109155	0.0137297	0.00918337	0.0152554	0.056809	0.182751	0.0152879	0.0150048	0.0200036	0.161411	0.0212985	0.0212971	0.0169971	0.00784051	0.0256927	0.0421115	0.00909968	0.00877348	0.00846302	0.043411	0.0104434	0.0076639	0.0113518	0.0142868	0.014218	0.00647605	0.00591482	0.00617063	0.00575305	0.00524065	0.00469104
0	0.00426193	0.0047306	0.00556718	0.00739917	0.00761264	0.0135839	0.0130132	0.0152465	0.0118839	0.0116922	0.0183988	0.0101768	0.0168994	0.0306873	0.0101865	0.0119097	0.0100838	0.0129342	0.0471534	0.130052	0.0388726	0.0171014	0.0177619	0.147992	0.0243664	0.0270003	0.0188987	0.0100838	0.0299413	0.0420944	0.0174269	0.012797	0.0133845	0.0512435	0.014133	0.0102736	0.0163329	0.0207238	0.020873	0.00944924	0.00824209	0.00953854	0.0110503	0.00922381	0.00772167
0	0.00374149	0.00409657	0.00523471	0.00767991	0.00679238	0.0146022	0.013323	0.0172453	0.012403	0.0135064	0.0223816	0.0105111	0.0183878	0.036606	0.0100623	0.0131981	0.00901629	0.0133498	0.0527886	0.154522	0.032032	0.0159415	0.020607	0.157865	0.0228711	0.0241889	0.0172631	0.00849936	0.0278827	0.0424478	0.0137181	0.0105602	0.0107871	0.0476348	0.0115364	0.00803248	0.0137282	0.0180849	0.0178854	0.00717555	0.00573654	0.00722958	0.00806683	0.00610837	0.00466927
0	0.00394674	0.00598394	0.00439148	0.00575524	0.00409593	0.0161196	0.0139585	0.0106103	0.0103082	0.0181934	0.0209976	0.00798137	0.0473782	0.0191688	0.00774245	0.0127928	0.00800074	0.00945274	0.0708132	0.101567	0.0281001	0.00995284	0.0197797	0.229625	0.0316473	0.0129763	0.0169134	0.00831066	0.0427682	0.0272154	0.00687149	0.00710601	0.00656213	0.0527608	0.00875333	0.00644911	0.0106949	0.0105152	0.0190578	0.00607	0.00633468	0.00610762	0.0101939	0.00910406	0.00687277
0	0.0023817	0.00378491	0.00270585	0.00357523	0.002178	0.0114322	0.00998882	0.00709456	0.00684359	0.0133906	0.0163397	0.00546372	0.0382777	0.015319	0.00539626	0.0105083	0.00582816	0.00734778	0.0698935	0.101533	0.0276248	0.00813108	0.0189576	0.251903	0.0364134	0.0124459	0.0176185	0.00677025	0.0565111	0.0319911	0.00521655	0.00560679	0.00482847	0.0721099	0.00781324	0.00474285	0.0115502	0.011209	0.0246097	0.0050039	0.00585624	0.00548896	0.0121624	0.00998623	0.00616571
0	0.00203593	0.00375082	0.00242644	0.00333928	0.00191336	0.0111701	0.0113608	0.00701359	0.00669908	0.0137995	0.0184809	0.00554802	0.0393679	0.0153897	0.00617442	0.0104656	0.00720133	0.00764912	0.0689125	0.0975235	0.0385902	0.00991534	0.0196258	0.251791	0.0335919	0.0182895	0.0173072	0.0081021	0.047543	0.0294014	0.00869217	0.00804713	0.00726879	0.0612865	0.00882682	0.00559656	0.0108441	0.0111356	0.0214076	0.00546309	0.0055157	0.00555006	0.0109871	0.00904708	0.00595221
0	0.00186189	0.00316573	0.00232527	0.00337031	0.00229652	0.00965157	0.0118385	0.00731252	0.00705858	0.0126525	0.0189335	0.00583426	0.0392376	0.0163025	0.00705129	0.00963242	0.00746406	0.00735082	0.0724074	0.102159	0.0446409	0.0110038	0.015223	0.259826	0.0365015	0.0189268	0.0139226	0.0077897	0.0491792	0.0269393	0.00916759	0.00737646	0.00693775	0.0548515	0.00792195	0.00494987	0.0103688	0.00896993	0.0192956	0.00475933	0.00486053	0.00499144	0.00977617	0.00837401	0.00553992
0	0.00200044	0.00315646	0.00247913	0.00339123	0.0026545	0.0171716	0.00742615	0.00630786	0.00597552	0.0113302	0.0110808	0.00722926	0.0313499	0.0110407	0.00798631	0.0116877	0.0061678	0.0098565	0.0569638	0.0683677	0.0175872	0.00964755	0.0251097	0.307583	0.0380497	0.0118453	0.0202575	0.0178761	0.046907	0.0181679	0.00945596	0.00895802	0.00769397	0.0695447	0.0113958	0.00860304	0.0135696	0.00984008	0.0201051	0.00567834	0.00677574	0.00675395	0.0106718	0.00833738	0.00596165
0	0.00250926	0.00366199	0.00298212	0.00410597	0.00329459	0.0195424	0.00816692	0.00735487	0.00716999	0.0141208	0.0119167	0.00846871	0.03281	0.012808	0.00934419	0.01432	0.00705762	0.0112965	0.0546728	0.0717079	0.0176227	0.0106874	0.028812	0.2789	0.0346426	0.0129504	0.0225895	0.0175217	0.0424457	0.0194781	0.00999145	0.0105799	0.00915846	0.0635376	0.0126938	0.0100602	0.0142795	0.0111497	0.0194812	0.00689073	0.00767473	0.00756521	0.0100966	0.00787366	0.00600572
0	0.00134537	0.00292069	0.00179852	0.00323033	0.00146602	0.0219832	0.0104624	0.00641585	0.00576657	0.0123764	0.0134579	0.0067478	0.0346923	0.0106169	0.00693905	0.00996124	0.00573186	0.00832351	0.0576369	0.0669075	0.02344	0.00902859	0.020546	0.332856	0.0354138	0.0171438	0.0166284	0.0157548	0.0458318	0.016396	0.00796672	0.00851273	0.00696283	0.0684325	0.00905556	0.00676709	0.010898	0.00752091	0.0188201	0.00392084	0.00494898	0.00487526	0.009256	0.00623854	0.004005
0	0.00103031	0.00267837	0.00172379	0.00297745	0.00157992	0.0169786	0.0110347	0.00584368	0.00520402	0.0100029	0.0136572	0.0062984	0.0317715	0.0102254	0.0074554	0.00940998	0.00648971	0.00875334	0.0569507	0.0638499	0.027253	0.0108485	0.0203132	0.31445	0.0383184	0.0246427	0.0177846	0.0173746	0.0497444	0.0170337	0.0103915	0.0116722	0.00948504	0.0663603	0.0111722	0.00770959	0.0119323	0.00768377	0.0185396	0.00447616	0.00473427	0.00510055	0.00939886	0.00595979	0.00370564
0	0.00336351	0.00564195	0.00388939	0.00508876	0.0037351	0.0193986	0.0105253	0.0090536	0.00990678	0.0227688	0.016186	0.00732158	0.0320806	0.0187755	0.0175211	0.0159689	0.00688208	0.00928524	0.0549551	0.115032	0.0367598	0.012662	0.0235139	0.207222	0.0365274	0.0114625	0.0189781	0.01229	0.0380188	0.0265735	0.0079199	0.00760025	0.00682094	0.0479515	0.0096371	0.00908368	0.0121904	0.0126077	0.0184507	0.00583601	0.00959776	0.00674049	0.0126268	0.0126876	0.00886182
0	0.00416029	0.00707456	0.00452477	0.00579062	0.0041368	0.0228478	0.0122148	0.00991509	0.0108219	0.0250334	0.0173856	0.00768428	0.0374177	0.0188317	0.0192412	0.0164093	0.00706946	0.00925928	0.0583604	0.112763	0.0419086	0.0125743	0.0230784	0.208614	0.0387433	0.010744	0.0180434	0.0120779	0.0377164	0.0232051	0.00732621	0.00696914	0.0062686	0.0431926	0.00888292	0.00816208	0.0106795	0.0107233	0.0153442	0.00528807	0.00838367	0.00587016	0.00967997	0.00914234	0.00643946
0	0.00332564	0.00517945	0.00382597	0.004615	0.00457574	0.0126136	0.0108812	0.00787129	0.00799865	0.0157752	0.0168193	0.00679648	0.0296767	0.0137686	0.0143231	0.0121894	0.0082061	0.00843628	0.0522187	0.0813009	0.0509182	0.0133847	0.0200871	0.211736	0.0409901	0.0183859	0.0180092	0.015951	0.0465569	0.0243227	0.0120415	0.0118417	0.0102041	0.0532846	0.0132738	0.0119688	0.0154672	0.0134135	0.0206488	0.00795899	0.0111247	0.0083668	0.0119707	0.0103054	0.0073907
0	0.00633049	0.00734421	0.00529395	0.00626092	0.0051102	0.0172512	0.0111703	0.00914229	0.00913798	0.0187284	0.0147691	0.00735712	0.0240531	0.0145151	0.0137528	0.0135105	0.00767478	0.0088667	0.0408082	0.0878163	0.0374861	0.0128229	0.0212484	0.174835	0.0349471	0.0163057	0.0210877	0.0167748	0.0431198	0.0322068	0.0128655	0.0130096	0.0116844	0.0582194	0.0146574	0.0140368	0.0176137	0.018464	0.0254	0.00914886	0.0144229	0.00995955	0.0160638	0.014572	0.0101539

## Sheet: Table S7
Table S7. Analyte areas of neutral N-glycan dataset.
y	H3N2	H3N2F1	H4N2	H3N3	H4N2F1	H5N2	H3N3F1	H4N3	H3N4	H6N2	H4N3F1	H5N3	H3N4F1	H4N4	H3N5	H7N2	H5N3F1	H6N3	H4N4F1	H5N4	H3N5F1	H4N5	H8N2	H5N4F1	H4N5F1	H5N5	H9N2	H4N5F2	H5N5F1	H6N5	H4N6F1	H10N2	H5N6	H6N5F1	H5N6F1	H5N6F2	H6N6F1	H7N6	H7N6F1	H6N7F1	H7N6F2	H7N7F1	H8N7F1	H9N8F1	H10N9F1
1	3163.36	4885.69	3670.85	3771.86	4772.23	8013.16	6065.16	6113.9	5187.2	10538.7	8248.52	6297.69	12570.8	6472.37	5385.3	9507.26	6316.85	7245.35	19627.6	29209.7	9644.53	6997.5	12319.6	139449	22217	7672.78	12301.4	9442.14	16592.1	9514.07	7674.12	7643.67	7042.52	32665.2	11056.4	8115.31	10016.1	8062.49	16340.4	8769.79	7575.29	8797.27	13051.7	11632	9792.44
1	2682.01	3283.92	2969.17	3009.11	3950	4904.76	4395.52	4288.15	4036.27	5586.37	4894.99	4287.15	5996.44	4356.75	3990.75	5379.1	4372.39	4650.71	8149.61	11098.2	5395.67	4539.36	6207.25	43196.4	9125.58	4781.42	6308.53	5275.61	7527.84	5430.79	4752.17	4770.73	4585.7	13132.3	6453.39	5490.85	6161.15	5385.12	8148.22	5669.39	5208.58	5734.4	6909.8	7159	6539.06
1	1011.7	2374.8	1685.59	1415.96	1734.23	4777.69	3575.58	3469.13	2098.77	8220.9	7046.89	3681.03	10059.9	3951.23	2568.57	7225.11	3838.69	4934.19	18302.1	31018.2	8245.87	4120.55	10518.4	156743	19772.7	5531.63	10033.8	6159.73	13629.5	7100.64	4474.13	4790.95	4168.05	32427.8	7248.66	4454.34	6590.42	4219.35	15452.1	5079.05	3872.16	5362.92	11013.2	8292.94	5963.84
1	2029.29	5595.33	2722.39	2742.44	3021.56	10516.3	8007.44	6709.11	4092.05	16173.3	14261.7	6766.47	20249.9	7301.92	4562.57	12918.1	6884.64	8098.04	35384.6	58591.3	18204.6	7917.5	16864.9	299703	39455.8	12919.3	17612.6	11524	27298.2	12880.3	8676.32	8737.28	7355.34	59710.8	14230	8074.92	11862.9	8185.78	26166.3	9309.71	7211.6	9616.98	18706.5	13951.5	9966.9
1	5171.1	14595.6	7797.23	6086.69	6317.38	34071.9	12907.9	9564.63	7085.72	35981.5	18049	8291.25	37197	12323.2	8249.26	32468.3	9852.91	10736.5	40059.5	84167.6	29659.3	11773.9	32813.6	142786	46510.5	12469.4	21130.1	23095.1	46190.8	14865.2	13085	11334	10179.2	37404.6	19454.6	15320.9	23223.7	11594.9	26656.3	17119.2	13467.6	23581.1	13315.4	8721.18	6980.42
1	6565.7	21391.6	10666	8118.56	7792.91	50190.5	19401.3	13325.7	9677.08	61383	30580.9	12448.7	71547.5	21449.8	13559	59759.7	16072.8	18438.7	84579.2	174069	61991.5	22240.3	69326.7	326971	102423	25113.2	46697.2	54021.2	116640	31476	28710.4	24076.1	21318.8	93958.7	43182.2	32505.3	54725.2	22317.9	67663.9	35953.6	30811.8	57609	28941.7	14034.2	9347.13
1	5688.25	18332.5	7915.28	6231.16	5162.15	63526.7	27781.8	13708.4	8117.68	85296.9	48626.9	11769.2	91586.8	23595.6	13321.9	72645.4	21373.6	18659.9	104377	211934	86386.6	23077	78424.4	382317	121579	29988.5	61524.1	70865.6	160013	36583.3	30742.9	24663.6	21770.8	128714	49421.1	36956.9	72059.6	21605.1	86638.9	38095.7	30666.5	63139.5	24943.5	12041.9	6084.18
1	6868.36	23212.4	9069.15	6363.02	5007	71640.2	28813	13989.5	7652.31	84218.6	46523.6	11285.1	89648.6	21326	11875.8	69324.6	18716	17237.2	107613	237149	84980.8	22416.6	77293.1	452615	140484	30009.1	62430.2	76585.1	196137	40288.3	31205.3	23612.4	20446.7	153604	54073.1	40441.4	84233.3	22873.8	102538	43518.2	34702.5	76386.2	30330.6	14197	6767.32
1	8064.86	10884.9	8984.04	10391.3	9667.91	35081.1	23056.6	21450.8	16501.1	36720	41425.4	16813.3	46764.6	34985	12691.7	36691.6	16118.8	22467.2	115637	222786	26031.8	20043.9	52551.6	534974	67089.2	25733.2	38594	17044.3	70088.8	53035.2	15088.1	15182	13714.6	169103	23089	14914	28369.9	24624.8	69456.2	14686.3	15434	16670.2	30875	21585.4	15347.9
1	10065.1	16738.2	12172.7	15880.9	11034.6	46086	37611.2	41402	22340.5	63407.7	74727.4	24276.7	65930.6	80066.6	20249	66031.8	23657	38223.8	172517	585237	47217.1	33449.4	94163.4	747277	74944.9	54263.5	66988.9	21459.8	126872	145951	25313.7	23903.1	21232.3	249557	34128.7	21512.7	51783.7	53764.3	104473	20677.8	23067.8	26644.6	45027	31495.3	20754.7
1	7547.2	10659.5	8166.13	10306.9	7321.29	27243.2	22616.7	23750	12518.9	36014	42422.2	14251.1	32349.9	40055	11619.8	36752.5	15731.3	20751.6	83888.7	299011	48183.5	20154	54434.2	397134	38334.8	35347.4	37147.1	13098.7	64773.6	81809.7	19503.3	15915.3	14461.2	143786	20787	13247.9	31847.8	35454.7	71026.1	14028	16080.4	18982.8	35134	25528.3	15894.6
1	6333.6	9030.86	7004.34	8722.98	6337.7	23701.5	19585.8	20690.8	11022.4	32727.1	37645.9	12811	29534.8	35956.2	11031.2	33254.2	14217.1	18479.1	77322.8	274075	47098.7	18915.5	48414.6	372540	37012.4	33745.7	36627.9	12509.5	60824.9	75434.5	18801.9	15179.3	13772.3	127717	19132.9	12011.4	28197.2	31624.9	59278.3	12509.4	14008	16210.1	29333.5	21032.9	13672.1
1	5590.87	11371.6	7498.85	6895.31	7041.48	34575.8	19715.6	12779.4	10120.8	31398.4	25451.2	11074.8	39748.5	17515.9	13792.8	27705.6	10980.4	12804.2	65759.6	75673.4	25385.2	13138.7	30148.5	242042	38366.5	14338	26373.1	15090.4	42409.4	18867.3	12961.7	12105.6	11652.9	54124.2	14980	11877.8	16667.7	13184.4	21691.1	9128.62	9925.28	10319.7	15290.5	17677.9	14176.4
1	6875.95	13860.6	8376.42	8115.54	8346.4	48360.4	25721.6	16459.4	12588.4	48464.6	35986.3	14442.6	60415.9	24486.6	17631.5	42951	13986.6	17565.5	106711	120170	36925	16888.8	48387.8	430484	62564.7	19030.8	41182	20843.8	72267	26680	17391.2	16414.2	14852.2	98899.5	21140.3	16152	24968.8	18846.2	38240.3	12649.3	14470.5	15399	23426.1	20831.6	15953.6
1	3993.35	9941.18	6289.72	5116.43	5473.15	26766.8	23551.5	11528	8781.39	27065	34037.3	13610.5	42337.3	19802.9	14733.6	29445.6	18414	19509.4	102542	112539	62925.8	27599.9	44358.3	552996	92892	72536	55356.2	47299.3	145748	54347.1	42763.4	43704.1	40690.7	203226	51951.8	41415.1	62795.4	41840.6	98373	29259.5	34747.7	39275.1	72785.9	70206.3	56241.7
1	372.804	1061.86	577.871	525.44	481.754	3350.02	2939.44	1070.52	870.148	3934.49	4511.97	1084.1	7021.13	2150.71	1498.84	4070.37	2064.24	1578.86	15785.3	13513.7	7241.24	2061.03	5415.58	79880.5	10827.7	5147.32	5723.43	3522.68	15240.5	4099.43	2546.58	2898.1	2451.64	22661.8	3409.23	2605.05	4709.07	2395.04	8165.15	1760.35	2223.78	2466.79	3577.53	2483.33	1718.71
1	17682.2	12748.6	10956.2	12505.5	7320.64	57127.5	17292.4	20905.9	24586.3	47852.3	25250.5	14040.7	26625.8	31350.2	47350.9	47505.2	11278.7	17863.2	50146.2	107562	21398.7	65691	69509.7	233625	29029.4	81784.4	53693.9	17488.3	31498.2	33114.6	12663.6	30112.4	35191.4	61403.1	15828	15199.7	16479.8	22329.4	27325.8	10867.7	14684	11106.4	18607.3	18697.8	15642.9
1	23926.2	16474.3	13488.6	15903.4	7819.92	77597.9	20513.3	25811.7	30552.4	65607	31714.4	17844.3	35325.3	39969.1	60366.6	66298.9	13306.9	22684.3	67445.5	148075	28190.4	83220	103961	348098	39473.2	108154	76430.4	24198.2	45613.6	46295.9	15358.5	39512.9	46808	94752.9	19744.9	20099.2	23004.5	32443	43842.7	14047.8	21930.8	14890.4	28288.6	26860.2	19696.4
1	14945.5	10169.8	9551.92	8528.34	5949.3	38456.8	18239.9	14871.2	15902.8	31377	22537.4	10813.2	17774.7	21099.7	27331.9	31350.8	13420.9	14342.7	34895.2	72019.4	27151.7	42289.6	49956	171792	26041.7	67114.3	42231.1	18850.1	33155.5	32130.4	16881.6	27701.3	30967	59762.4	19301	17530.3	20359.1	24594.8	31732.8	14133.4	16898.5	13573.2	20916.3	20353.1	15782.8
1	14186.1	10278.5	9675.73	9103.01	5618.09	41920.8	19352.8	14986.1	19256.7	38046.5	26103.3	12291	24499.2	25539.5	36846.3	40699.9	14877.3	17958.1	47692.8	88407.8	32523.9	52463.3	67642.8	225468	30265	73910.1	50516.8	18985.7	35496.4	33160.2	15615.5	28628.4	32815.6	66708.5	18086.2	16187	18990.7	23539.8	32256.1	12814.8	16610	12422.2	19695.3	17275.8	12496.6
1	12825	16992.7	15652.1	19248.1	10905.6	52772.4	31395.2	47348.5	27132.7	55944.5	63871	23242.8	45551.1	85179.1	24454	53735.7	19567	33165.6	120004	356398	40490	39168.7	72148.2	392382	71083	66419.5	58436.3	17824.8	126733	102478	20629.4	21452.9	20590.4	146672	35832.4	18507.1	56407.5	39091.8	62671.8	22091.3	12542.7	27090.3	19198.9	12410.4	10104.7
1	17307.1	26218	23770.5	32115.8	15865.1	98667.5	65867	91376.2	49720.4	119662	147749	47991.3	98717.1	185209	50694.7	123662	48709.3	70869.7	289050	862920	164060	93914.8	170505	986927	172404	177427	143683	39787.8	318339	271937	65550.6	57963.2	58392.7	392904	85907.6	42329.5	177080	124062	218872	59997.5	27199.3	111647	107023	69799.1	41597.7
1	26119.6	37097	33979.4	44180	24764.4	131164	86995.6	119912	67244.1	158458	190908	66179.5	129162	238897	69683.8	163369	66754.7	96089.9	368759	1.09575e+06	205330	124197	228957	1.26352e+06	225237	229258	189327	57694.2	411098	350517	87441.1	79483.4	79438.2	508360	117743	61085.7	232381	163622	285177	82463.3	40800.1	147519	140663	93506.6	57201
1	6499.71	11467.5	8137.66	10251.8	8674.25	46688.5	27659.7	21223.7	16625.2	37888.6	48843.4	16265.7	57172.7	35675.8	11139.8	37837.9	15914.8	21539.2	140078	236233	25513	19962.2	47912.8	698585	78519.2	24545.7	37441.3	16635.8	79305.9	49150.7	13667.7	13537.1	12392.2	183531	22549.5	14560.9	27470.5	22163.3	69560.1	13805.2	14826.5	16036.7	33100.8	26493.7	19167.8
1	6781.57	12066.1	8863.85	11276.2	8797.6	55100.4	32300.5	26356.8	21049.4	57271.9	67326.8	22469.1	84907.1	49980.2	13924.2	60349.2	21495	32145.3	225027	361662	39297	27843.8	91767.1	1.07138e+06	127634	35578.4	63511.9	22662.8	125162	79988.6	18161.2	18423.2	16251.8	329393	33427.3	18754	43033	33841.9	127407	19575.8	21714.7	24218.4	53595.3	34736.6	22660.5
1	8568.03	13860.5	10690.5	11870.8	9793.66	46356	37438.1	23248	18413.1	39651.7	60110.7	18845.7	63315	38050.3	14012.2	38315.1	23447.8	24516.2	152525	232772	66431.6	28766.6	50195.9	777253	89946.6	57804	42762.5	23135.5	82140.4	51888.9	23469.2	21503.5	20485.9	193100	29731.1	19592.6	33205.5	26470.7	80307.8	19521.6	19654.1	21546.7	45247	38075.2	27605.8
1	6034.27	9371.77	8106.17	8244.11	8480.99	31412.4	21191.8	16049.5	12759.3	31407.1	37433.3	14141.1	41633.5	24549.6	10310.3	31411.5	15700.3	18124.1	95560.3	136823	33033.4	17932.4	44539.9	506537	58310.4	26543.4	35080.3	15952.8	53661.8	35735.3	15459.1	14286.1	12938.7	135788	21079.2	13794.7	22543.1	18592.5	54977	13369	14331.4	14374.5	25663.7	19693.6	14083.5
1	2799.62	3447.67	3047.68	3111.74	3968.47	6191.9	4986.96	4725.19	4292.1	7093.88	6682.98	4580.42	8660.1	5515.89	4592.67	6468.74	4974.25	5443.65	15244.6	22781.4	7098.37	5424.06	7797.81	117336	12772.2	6718.83	7807.12	6842.27	19205.7	10542.2	5785.44	5382.82	5275.17	38881.8	8131.11	6781.37	10070.4	7723.14	18377.9	6546.51	6571.09	8314.68	11659	10425.5	8853.38
1	2796.82	3460.09	3081.33	3154.17	3919.79	6300.33	5139.48	4739.76	4407.61	7459.4	6687.49	4907.5	9028.68	5548.06	4510.94	6657.5	4944.36	5383.57	15937.9	23297	7166.16	5405.4	7977.68	121087	12833.6	6456.38	7796.46	6548.27	19084.4	10127.7	5687.39	5118.48	4962.26	36194.3	7841.54	6390.46	9525.84	7343.08	17071	6216.43	5960.83	7845.39	11075.3	10055.4	8369.91
1	1653.9	2974.27	2266.9	2282.92	2526.26	9106.22	7238.8	5246.27	4066.82	14459.8	16596	6039.44	19836.6	8309.73	5059.26	12422.7	7089.43	8053.06	47254.6	72399.6	18386.8	7774.83	17706.9	429735	32734.4	15064.3	16092.2	12239.4	52996.9	24736.4	9674.5	7502.15	6716.96	123808	13341.7	8892.94	20496.2	12345.7	50797.9	8784.36	8259	13884	26363.7	18429.8	12456.5
1	14431	16462.7	15337	15878.6	16854.9	43320.8	36298.7	44495.1	26228.8	61843.4	74619	27829.2	59713.1	83122.6	22824.1	61796.6	25777.6	40561.9	144565	496932	42455.7	37639.6	80290.3	664638	73078.8	56348.6	51334.4	23009.3	101301	132099	23850.3	23693.1	22017.9	170971	31154.6	22423.9	36491	40920.5	52311.9	19293	16320.9	19152.2	18308.4	13713.1	11836.1
1	4806	5371.41	5214.84	5464.64	6290.5	11344.7	10279	12304.4	8389.26	17252.8	19254.8	9024.33	15618.3	19353.6	7980.94	18000.9	8519.41	11593.4	33708.3	107712	13347.5	12143.4	24197.6	157452	20597.2	17376.2	16871.5	8857.74	27388.6	38306.5	9270.02	9422.5	8808.54	50763.4	12087.5	9003.36	13516.8	14526.3	18990.1	8041.15	7231.92	8040.33	7890.84	7055.55	6355.29
1	12013.8	17528.5	13924.9	18077.5	12257.6	52021	38269	48470	24520.9	72148.5	83438.5	28463.6	63165.6	92271.8	22772.3	77504.7	29207.3	46988.3	176705	659729	81883.5	47187.3	116222	963364	97498.1	88373.8	74506.2	29084.2	145543	220284	38194.2	33694.3	30305.8	289947	41793.3	27216.8	61659.4	76859.8	113701	24648.1	21298.6	32381	46398.8	27162.9	17669.4
1	8015.47	9756.36	8632.62	10260.7	9323.22	21966.8	18904.6	20917.9	13197.2	28921.3	35996.8	15190.4	28691.7	36749.5	13995	32139.5	16695	22965.7	71869.3	230375	38790.4	23619.1	52602.2	371582	44515.4	39370.6	34085	18111	61092.2	82597.3	21073.7	19467.6	18122.4	115815	24892.4	18503.4	31139.1	35052.4	49944.3	15884.1	14041.8	18541.7	23420	16473	12216.4
1	12041.1	21581.5	13743.5	19540.9	11282.9	52883.8	37565.3	49954.5	37713.6	66247.9	76246.8	24642.2	93178.9	100069	33819.7	64274.9	21178.8	37292.6	146176	527767	69217	50485.7	85238.3	500664	107105	73527.6	74536.7	26430.3	132839	205305	45375	32413.8	30521.4	206241	63838.8	30991.6	71767.2	90647.1	107367	42796.4	24641.5	41653.5	47241.2	33076.2	19810.6
1	14883.5	28073.9	16753.1	24828.4	12364.1	64205	49452.1	63623	48143.1	81544.4	102529	29641.8	126800	129494	42341.5	80096.3	25511.1	47277	199932	676466	100258	65930.9	109091	667282	157261	96164.8	97910.6	33070.9	193056	273607	63505.1	38365.7	37269.5	277758	89372	39585.1	96741.1	112428	139950	55852.2	29858.2	53821.7	63267.4	47076	30652.8
1	4773.67	6844.95	6162.23	6857.66	5954.86	16790.8	13431.6	15804.4	12797.4	25147.2	26853.7	11097.9	30707.2	30498.4	13815.2	27190.2	11497.1	15437.7	50385.2	155524	36509.3	20882.1	39235	156086	36785.5	28330.2	31884.8	12884.2	42785.8	63739.4	21022.5	15522.6	14669.3	66273.7	24848.2	14175.8	26074.8	32430.5	37142.7	17113.9	12793.2	16103.5	17931.6	13245.2	8544.71
1	2878.91	4018.45	3648.05	3960.14	4022.78	7681.54	7494.33	8281.86	6768.02	10583.5	13835.8	6225.53	14747.1	14685.8	7297.59	11831.7	6758.98	7757.28	24362.7	70782.4	22714.2	11230.7	18571.1	74453.3	20351.4	16406.5	14842.3	7483.88	24700.9	34476.6	13876.4	9677.3	9187.75	39399.5	16169.8	9151.68	17263.7	19784.8	24131.6	11855.2	8431.22	11381.8	12146.4	9154.27	6325.29
1	12728.4	23269.2	16483.4	22088.2	13631.2	108332	60969.9	55721.7	42326.3	115787	113841	42332.6	177949	114299	74766.2	102177	34883.6	56676.6	366030	846605	190132	77002.2	166925	1.51454e+06	245362	96514.5	127640	50772.6	321053	206221	36483.7	31374.8	28203.6	405506	55265.7	56952.7	67657.1	67732.3	119519	24489.2	21495.6	26373.6	34093	19743.3	13025
1	1456.51	2287.21	1627.25	1833.74	1740.76	6031.75	5532.7	3649.18	3122.22	6735.72	8888.33	3275.22	11805.9	7067.46	5606.23	7043.63	4638.17	4661.05	27488	50592.4	25016.7	7973.18	14444.7	153411	24702.8	14108.9	12605.1	6956.69	31937.8	18091.7	7369.71	5990.22	5260.98	43725	7887.73	7326.68	8842.93	7874.26	14602.7	4148.53	3447.2	4178.35	4817.05	2973.52	2134.81
1	4907.34	7183.99	4644.93	6064.62	4867.27	23475.1	19413	13324.2	10469.5	23668.9	30938.8	9544.89	41939.5	23891.9	16315	18808.3	11218.5	12034.9	76250.7	150454	64796.6	19174.7	27232.1	316324	53162	31383.1	23778.2	13848.1	63939.2	36539.8	14714.5	11732.7	10796.2	77319.3	15329	14660.8	16200.9	15095	25156.4	7965.16	7190.62	8092.64	9173.22	6357.71	4386.49
1	3597.61	5036.17	4028.32	4257.93	5201.74	10087.1	8755.41	7113.28	6203.04	12465.2	14901	6743.38	21405.8	9950.18	6355.18	13075.1	8519.82	8871.88	40674.1	63589.9	12767	8634.09	17294.7	249248	22211.6	11369.8	15776.5	10384.1	36414.2	30433	9052.94	9330.6	8789.36	86889.1	12972.6	10507.1	16094.5	15163.4	37631.3	10178	11840.4	11240.3	21946.6	17738.2	13240.9
1	3220.8	4263.49	3508.68	3736.04	4724.23	7869.25	6996.48	5841.47	5344.48	8967.26	10506.6	5729.97	14806.7	7432.47	5451.78	9701.4	6790.49	7130.99	27543.3	41751.1	9832.56	7138.77	12645.2	165497	16575.3	9258.36	12054.7	8472.56	27426.7	22401.3	7777.99	7754.42	7525.57	62266.8	10682.1	9334.16	13380.2	12580.3	27804.9	8830.29	10276.4	9717.15	17244.3	14680.7	11118.6
1	1799.97	4018.46	2688.02	3020.27	3182.73	11598.5	10447.9	6718.16	5074.9	17446.2	23181	6787.01	33150.1	11955.6	5673.66	18234.7	9782.17	10238.7	68885.2	107446	20219.5	9077.91	23277.3	413086	29243.1	14327.9	18367	9971.39	48141.5	37683.4	9316.32	8454.62	7826.25	116049	11830.1	8672.19	16189.7	15054.6	45885	8098.73	9972.55	9835.79	25269.9	17388.2	11225.1
1	1239.3	2615.94	1704.9	2019.23	2085.96	7112.29	6400.19	4287.13	3337.67	10554.2	14982.3	4606.32	20418.1	7231.22	3617.94	11209.9	6431.36	6519.4	41316.4	64657	13689.4	5971.96	14321.9	256043	18350.6	9534.46	11408.8	6624.26	30400.1	24079	6356.72	5908.3	5568.76	74672	8141.15	6080.72	10917.7	9595.94	29291.1	5684.2	6931.22	6752.65	15762.8	11471.8	7367.06
1	5281.23	7053.37	6438.67	5425.69	6998.4	21647.3	10692.6	9831.5	7291.95	15417.1	18836.2	9805.11	22535.3	10342.6	8233.31	16268.4	10911.6	12754.2	38814.3	72850.3	17436.6	13163.2	23994.4	245365	60236.7	21599.2	20924.5	24349.3	134075	34025.6	14641.2	14256.8	13387.9	95921.8	23673	17096	42492.3	18958.5	47591.8	15106.3	15842.1	20424.8	19855.6	15736.8	12468.2
1	7436.66	11562.6	9951.89	7834.76	8289.99	44562.3	19164	16280.8	9777.98	28597.3	39566.5	15389	49084.1	18081.1	11641.2	30834.2	16356.9	22173.9	92365.1	170028	35891.4	23509.2	49196.1	634068	153970	42926.3	42979.4	51353.7	364984	75407.6	25084.8	23233	21076.2	242861	45815	28351.1	100797	31948.4	114667	25132.5	27419.6	40748.1	39125	27552.2	19292.7
1	2674.12	5907.47	4834.6	3316.99	3193.37	27784.1	12047.9	8584.4	4311.02	16154.6	23242.2	7638.03	25087.2	8729.03	4965.03	15830.9	8627.05	11382.1	49459.2	95150.3	23430	11825.3	23919.1	343731	74968.1	25117.8	22038	27026.1	192352	42763.2	14750.2	15171.4	13042.8	145307	25369	15488.5	59840.6	18616.8	76665.7	14231.8	15764.8	25679.9	27089.5	19134.8	12555.9
1	2668.08	6110.43	4588.28	3627.19	3665.66	29784	14772.8	9449.98	4973.42	19721.6	33335	9796.32	39634.7	12109.2	6785.28	21987.2	12555.5	16174.1	81580.9	147042	37789.8	17802.4	35863.1	590297	131900	40168.7	32079.2	40816.5	312417	58862.1	20727.8	21148.4	18582.8	210227	34753.1	19343.5	81330	21761.2	96147.5	16675.1	18524.2	31055.4	30082.4	18278.8	11739.1
1	6057.73	6659.55	7063.91	7840.39	7808.01	25067.3	14890.9	16966.8	12264	21692	25122.8	12668.3	25672.6	28604.2	11658.7	18769.8	10793.7	16022.8	71100.9	157949	20793.6	16410.8	26066.3	355516	36781.7	23132.4	22174.7	12665.5	47609.5	47044.6	12395.7	11384.5	11013.8	95138.3	16713.5	13284.6	20371.8	22434.2	35620.3	11492.4	9878.34	12685.2	18728.9	15184.4	11683.7
1	5265.69	5837.65	5907.59	6080.51	6639.04	16773.7	10723.6	11715.7	9232.55	15508.3	17232.5	10212.3	18195.4	19149.4	9955.86	14883.6	9284.55	12611.2	47606	97803.3	16806.3	13184.5	22447.9	241372	27768.7	18046.6	18026.3	12051.2	34433.9	33035.8	11335.6	10735.8	10501.9	66213.1	15288.6	12334.9	16659.7	17987.2	27801.4	10668.8	9468.94	11072.3	14820.8	12564.5	9984.4
1	857.016	1432.27	1343.53	1772.23	1024.22	6378.36	5865.95	4241.91	2667.47	5004.18	10270	2756.91	8761.84	7935.55	2749.31	4024.99	3175.08	3849.61	29730.6	54149	16977.2	5902.63	7062.16	182450	16539.9	14659.4	6341.23	3758.72	21801.8	18405.5	6227.56	3858.08	3577.04	47891	5296.24	3520.05	7706.08	7666.15	17231.2	2852.49	2158.66	3798.63	6345.07	3884.11	2534.13
1	4155.66	4171.23	4498.65	5658.58	5349.54	17078.9	14317	12689.7	8741.62	15508.5	22705.2	10108.8	20671.4	23760.2	10234.6	15096.6	10221	13077.4	64905.7	143697	39232.5	18130.8	21669.6	367497	40214.4	32850	20713.8	14551.2	51255.5	50496	18235.3	13999	14328.2	102034	18157.8	14252.9	22761.8	24858.6	42366.4	11610.7	8701.8	13495.1	22828.6	17895.4	12964.5
1	13856.5	16063.4	18487.9	32010.2	17204.9	72694.9	59113.7	77076.3	49698.6	68946.5	105147	45681.7	113327	200545	34234.5	64838.1	34362	59288.5	355297	811612	63943.5	66249.6	105371	1.03869e+06	127014	112551	72475.3	30716.2	197425	175357	28240.5	30351.9	28483.7	249945	39712.5	26930.1	55659.2	55621.4	83407.4	23186.9	19937	29728.7	39593.8	26677.2	18232.9
1	9020.27	9531.75	10771.3	16466.3	11595	30194.5	27534.6	34105.4	23715.1	26999.9	43483.2	21810.8	42968.4	75024.1	17309.9	25195.3	19021.4	28115.2	124530	288445	26467.9	28472.7	34592.9	364947	47293.4	42856.9	26492.6	15653.2	67837.8	61521.5	14393.9	15318.9	14744.8	83163.2	18818.4	13846.1	22561.7	22534.1	29639.8	11961.4	10224.2	13238.8	15376.9	12076.2	9328.18
1	4317.37	4996.28	7306.39	14394.2	4713.47	32157.9	33018.1	37053	22808.1	31794.9	56987.6	20849.4	55377.2	97301.3	14456.2	28939.2	18614.5	26882.5	180395	406320	83168.6	34624.9	49366	555726	59577.5	65727.4	32137.2	12722.9	90522	81634.3	19751.7	15395.4	14398.3	118889	16279.3	9069.33	22796.1	22025.9	34877.7	8033.93	5704.28	10293	14554.1	8979.21	5659.68
1	567.524	816.054	1008.37	2066.32	841.558	4595.71	6225.81	5739.62	3809.34	5129.27	12230.9	3293.59	11421.9	16668.5	2813.24	4783.55	4107.9	4733.13	41451.7	74562.2	23560.8	7964.47	10285.7	133236	14349.8	15944.1	5957.67	2702.6	22006.6	15131.5	5011.93	3815.25	3558.45	27248.9	3414.6	1771.43	4914.08	3953.55	7555.14	1606.75	1269.99	2146.89	2633.06	1557.01	1176.75
1	7131.67	15004.4	9525.32	11230.2	9941.33	50759.7	35137.4	26831.4	15460.1	59649.1	64427.9	21827.1	81078.2	36712.9	23893.1	53445.8	23172.2	32265	168190	360214	58870.7	28014.6	81834.8	1.17326e+06	111687	37060.3	75615.7	36327.8	145751	79201.8	30362.7	31350.3	27255.7	290939	39323.9	28733.1	48785.5	38683.8	108039	20972.6	27138.1	25135.4	63417.6	52321.2	33933.8
1	4523.95	8996.27	5709.62	6561.84	6074.78	29000.9	18971.4	15397.9	9275.73	37488.9	38209.2	13301.1	53809.7	21575.5	13681.3	34490.7	13775	19213.1	112130	216002	37874.5	16338.5	56996.7	820248	75559.5	22042.6	50943.9	22649.9	100641	49485.5	17355.3	19212.2	16675.4	218185	24264.8	17878.6	32903.9	24316.1	81983.2	12983.3	19313.4	16206.7	39412.3	25310.4	15889.1
1	5806.89	13521.8	7665.37	8327.71	6156.19	43665.3	30485.7	20787.8	10336.9	51325.9	57811.3	17093	65499.6	26468.9	15736.6	42739.6	18132.8	22935.5	135475	287680	57980.9	20025.8	66366.9	1.00755e+06	88221.2	34858	59477.7	29359.8	119105	66226.9	23763.5	24457.2	20795.1	268360	30787.2	22916.1	40414.8	31905	99450.5	16123.4	23422.4	19674.4	52276.1	38280.5	24956.1
1	1128.59	1635.88	1346.55	1365.9	1618.82	3764.76	3342.37	2474.16	1958.47	4319.89	5299.05	2556.78	5356.22	3250.4	2579.11	4653.68	3210.27	3502.23	12714.1	26934.4	8551.55	3663.14	7896.21	111277	11661.7	8072.02	8632.95	5927.35	17751.6	10688.1	5757.2	5551.51	5337.28	35958.8	6896.28	5722.55	7978.32	6791.31	15806.7	4455.85	5194.99	4854.07	10730.1	8789.44	6090.37
1	9703.76	12181.3	8827.01	8237.4	9388.32	19157.5	13678.1	11626.4	9905.02	22449.8	16936.1	9890.57	19996.8	13165.3	10419.7	20673.4	10026	10737.7	29203.1	39792.5	18410.3	11204.2	24925	96964.7	21489.1	12003.1	21636.2	13615.8	24846.3	15329.9	11771.6	10971.3	10481.7	33996	14731.7	13982.8	15550.8	14219.5	18133.2	10967.5	12428.9	11398.6	13207.9	12692	10018.9
1	4155.04	5514.32	4065.14	3912.94	4476.31	8549.85	5907.59	5300.31	4833.27	9385.16	6438.89	4550.51	7283.56	5389.4	4525.57	8185.64	4426.74	4749.07	9505.33	12835.7	6515.23	4918.19	9468.15	28523.1	7678.45	5128.67	8905.2	5710.88	9239	6603.35	5118.28	5002.36	4767.61	13311.4	6363.18	6388.95	7096.5	6545.03	7997.12	5283.51	6178.06	5487.95	6209.07	6870.16	5850.64
1	8060.46	10304.4	11765.6	11281.2	10833.2	50692.2	31866.8	24679	19486.8	39169.3	48737.7	20487.8	45108.3	44729.5	20975.1	42040.5	22702.4	26983.1	126462	204350	68467.2	41892.8	51049.3	575861	108619	72240.3	45275.6	33261.4	176640	72779.3	36730.7	34925.3	35383	193629	52150.9	31799.1	72744.4	35648.4	62366.8	33474.5	19970.7	40453.3	26111	20779.6	13699.1
1	14099.5	17205.1	21756.2	19534.3	18652.3	86540.8	53234.2	43551.8	34318.3	67934.1	80230.2	36425.8	73795.3	77101.1	38772.7	75363.9	39227.5	48796.2	213074	374072	110625	75085.7	93181.5	1.03188e+06	189907	123083	80925.4	59491.1	324765	142677	64306.1	61065.7	61754.9	354554	93384.6	55532.1	138672	66226.4	118104	58708.7	34423.2	75295.2	47117.5	31741.9	21819.9
1	3220.78	3116.9	4108.71	3546.91	4280.91	11589.6	6138.04	5569.98	4815.24	14046.3	8689.29	5261.76	15587.6	6554.82	7649.14	12997	5591.59	6267.87	15835.5	23585.5	13502.5	7476.03	16333.4	63932.3	15155.4	7960.24	16040	9744.99	15625.2	10408.6	7472.96	7359.29	6919.14	23169	8543.71	8368.23	9376.98	8518.33	12530.2	6554.96	8691.88	7235.63	9392.29	10026.1	8632.5
1	7314.97	5375.12	11678.6	7812.51	8082.49	52265.7	18794	14881.7	10813.8	62025.6	34515.7	12016.4	75941.6	19262	25748.8	51779.3	13820.9	16302.9	71351.3	106662	61641.7	22840.7	65848.6	336308	69853.4	23257.1	66051	34236.9	67718.9	34491.9	19894.2	20534.6	16867.7	106341	22830.9	23920.7	29505.8	25711.7	49425.9	15290.9	26563.7	19403.2	34391.2	39120.1	29400.5
1	1014.23	859.288	1861.54	1373.77	1315.34	9291.32	4042.33	3078.23	1989.35	13108.2	8554.87	2618.38	15543.7	4189.3	4787.08	10619	3625.4	3367.89	14330.2	22670.4	12852.1	4531.4	12437.9	63696.2	11849.2	5249.06	11157.1	6154.48	12104.4	6523.7	3980.04	4191.8	3761.11	18888.7	4279.33	4130.21	5233.3	4124.68	8460.52	2653.1	4319.87	3272.43	4876.13	4248.55	2900.8
1	4783.64	3344.98	10155.9	6195.65	5514.7	52739.6	21862.5	14635.4	9198.38	66551.2	42105.5	11763	75330.5	19957.3	24681.6	53547.4	16110.7	15450.4	71348.9	126786	66275.7	23011.3	65657.3	348172	63056.8	30175.4	62765.9	33887.4	71801.2	40404.7	20979.9	21767.1	18673.8	118908	22973.3	23960.9	30780.9	25649.2	56055.4	14288.9	28242	18912.6	35511.9	34386.8	24181.8
1	3919.38	6242.06	4291.59	3597.81	4459.34	12753.9	6732.84	5675.17	4673.98	19164.7	8732.68	5897.48	13087.7	6851.29	5651.69	16644.5	5882.35	6885.09	20259.5	33487.9	10841.4	7698.24	24348.7	138589	19196.7	9934.87	24342.5	11219.6	30319.5	13861.2	9051.5	9510.69	8309.95	44458.5	11440.1	10046	15096.1	11349.2	21068.7	8484.1	10097.8	10432.7	14266.5	12755.9	10114.3
1	4454.59	7279.6	4577.61	3680.82	4669.21	12420.2	6885.23	5868.86	4684	15457.5	8033.87	5247.58	12193.5	6171.81	5271.23	12583.1	5421.27	6081.96	17449.6	26530.1	9814.53	6685.22	18325.4	120175	17468.8	8109.2	19346.5	9608.05	26980.8	11728.2	7923.92	8043.29	7119.76	37849.8	10336.5	9051.83	13326.7	10426.1	17585.4	7483.85	8740.15	9500.22	12768.1	13180.6	10929.8
1	9631.46	28941.6	13109.6	7689.42	7193.11	99082.6	38578.9	24088.9	11885.9	178825	68672.4	23782.5	98225.5	35369	20400.6	145425	30587.8	35260.5	164863	359482	89667.1	37899.7	203855	1.21777e+06	124377	59563.8	168999	48423.8	191777	76698.6	33576.8	38740.9	29342.5	262083	38163.2	30455	58874.2	38750.4	96522.8	20828.3	32737.3	31622.8	53063.3	39277.2	26153.5
1	9835.59	28901.3	11782.3	6311.15	6337.9	61550	36562.8	15544.6	8885.36	86262	53790.6	14239.8	63621.8	22609.7	13716.8	63865.4	25753.1	18977.2	100087	170279	76874.8	26499	91626.2	725007	86462.2	69244.3	89169.2	41435.5	144311	46206.2	31135.7	35900.4	29994.7	172001	34645.1	29271.2	48142.4	29488.4	68143.5	19669.5	23438.3	27525.1	49964.1	48320.7	34316.9
1	12774	16897.6	10902.4	10970.7	9679.63	32317	25509.2	20226.9	12889.5	30169.1	44620	13103.7	38103.4	25218.1	13779.4	27860.3	13890	16409.6	72088.1	150536	43230.4	17036.4	37168.7	300107	48259	23606.7	33448.2	27098.8	53238.9	41101.7	23105	16997.4	16121	102480	25788.4	22740	27881.9	24509.9	48710.2	17203.4	19874.2	18040.8	27186.3	21979.4	15403
1	4931.46	6415.23	4592.38	4727.94	5077.68	11124.1	9034.23	7888.42	6026.74	10593.1	13286.8	6193.77	12150.6	8899.69	6310.55	9835.18	6440.2	6750.99	18640.5	37836.5	13219.3	7586.72	12181.2	69712.7	14368.6	9999.22	11397.7	9811.91	15998.6	13987.1	9136.29	7709.7	7525.73	28975.8	10504.4	9910.96	10992.1	10543.1	16465.3	8410.64	9121.11	8364.61	10485	9466.19	7701.18
1	4805.95	8183.38	4515.03	4749.23	3577.99	14264.8	13961.5	8761.64	5295.94	12107.5	23703.1	5629.56	16013.2	11886.4	5677.67	11146.4	6803.2	7216.45	31863.9	65685.9	27166.8	8042.13	14893.9	133910	21746.4	12753.9	13882	11635.5	24464	18423.8	11844.9	8523.72	8421.48	46454.2	11350.4	10053.1	12681.5	10641.9	23705.7	7283.42	8658.18	8239.33	15042.6	12973.2	8839.47
1	14721.4	14997.4	10010.1	10264.4	8551.27	25533.4	23732.4	16267.9	10525.1	23725.7	39219.8	10875.2	30958.7	20325.7	11572.8	21793.7	12929.1	12498.1	57178.9	117773	46676	15176	27995.1	227030	37084.4	22245.5	23807.7	20034.5	40208.4	31182.8	19569	14792	14514.2	73494.8	19656.3	16656	20695.4	17769.7	34931.9	12457.3	13954.1	12957.8	18118.5	13709.1	8655.52
1	8524.59	19635.9	9265.21	11161.8	9931.38	45733	38563.7	21869.6	16890.1	48896.2	60087	18709.5	103125	33563.3	13541.6	41545.1	18651.6	22598	185245	201115	45786	20577.6	51110.7	903651	84749.7	26728.6	46998.2	24383.6	104388	40381.3	20138.1	19474.6	17367.1	185033	23743.3	17643.2	28119.8	21580.1	59024	14360.8	18047.8	16856.9	38373.4	38017.1	27227.4
1	10557.5	26392.8	11726.8	14387.1	10812.4	65282.8	55115.7	29766.4	21724.9	67139.8	81306.3	23736.8	132581	43982.5	16258.3	55286.9	22369.6	28193.8	246774	280194	58414.5	25952.8	70237.2	1.24643e+06	116789	36067.9	66328.3	32220.1	156413	58897.9	27261.3	28154.7	23616.8	279527	30938.7	22815.2	39499.8	30227	88935.9	18224.9	23389.5	22926.3	63078.2	66855.3	49210
1	3314.89	5226.62	3638.07	3885.95	4214.24	10954.5	10061.1	6529	5396.28	14582.4	16848.6	6721.04	25817.5	9527.28	5753.84	14161.2	7809.74	8515.71	49208.2	51159.1	17345.3	8793.92	20676.6	284175	26861.7	14103.8	20531.2	11714.6	33116.6	16628.9	10209.3	10807.5	9945.3	68408.2	12155.5	9204.8	12339.3	10410	25158.8	7655.31	8577.16	8050.43	14055.2	11298.8	8542.66
1	4174.33	10163.4	5046.11	5821.73	5058.42	21133.2	23434.1	11271.6	8989.79	24283.5	37630.7	10062.3	57103.5	18437.4	8607.42	22552.7	14204.1	12882.1	116719	116853	50074.6	17269.2	33440.7	704358	64636.4	47748.5	36426.2	21863.4	87925.8	32199	18339	20186.2	18172	172510	21110	14781.1	24660.5	17256.1	57876.8	11488.7	14540.7	13827.7	32266.2	28055.3	19255.6
1	2859.93	3882.69	3121.56	3255.76	4077.18	6240.24	5587.43	4832.72	4132.97	6334.08	6705.93	4403.32	8151.05	4908.75	4137.44	6292.97	4712.85	4907.39	10320.6	27437.7	6311.29	4776.05	7397.72	84002.4	9802.28	5410.08	7059.16	5518.54	11075.8	10900	4984.11	4823.89	4647.49	25832.1	6411.48	5649.9	6659.56	6593.46	11871.1	5208.93	5666.41	5337.76	7526.51	7987.92	7041.3
1	2985.92	3994.27	3313.53	3555.85	4353.87	6865.04	6130.83	5358.88	4512.66	8064.59	8833.43	5078.89	12118.4	6001.62	4887.81	8880.84	6085.67	6286.84	18441.5	54371.2	9640.5	6333.65	13181.9	206620	19247.4	7840.59	11996.4	8238.83	24504.1	22804.2	7335.02	6392.1	6024.67	68215.9	9699.08	7686.56	10565.4	10683.7	24999.1	6765.91	8231.11	6978.15	11821.9	9509.8	7437.42
1	2501.35	4202.37	2834.06	3257.15	3984.5	7863.72	7648.57	5350.07	4582.41	9421.82	11425.6	5558.95	13177.5	6815.26	5264.85	10180.7	7576.02	7413.06	20829.8	65694.6	22054	8546.89	14330.4	212044	22884.3	17616.3	14469.5	11331.6	27964.7	28156.1	12536.3	9778.9	9157.42	67417	13227.4	10536.3	13762.6	14129.9	29448.4	9108.6	10475.1	9882.79	17322.8	15822.4	11906.1
1	3611.39	7199.19	4484.16	5001.79	5543.88	14913.6	13479.6	9053.82	6555.72	20742.1	24335.2	9253.03	32214.8	12371.7	8391.21	22145.1	13511.6	14240	51119.6	153588	32169.8	13202.4	36245.4	532826	45407.6	21960.9	27387.9	16943	53772.3	51865.2	16307	12992.8	12016.6	150615	18378.3	13513.9	20280	21141.6	57458.6	11771.1	14702	12407.5	26904	20310.5	13497
1	9852.69	15301.8	11979.2	15539.4	13069.7	54677.3	37689.2	30703.2	22550.1	47745.3	59010.3	22312	77310.2	50056	19857.1	40903.6	21799.3	30262.6	185096	441611	50524.1	26228.5	62610.7	1.1038e+06	89023.1	36024.9	49277.5	26279.1	132777	86004.9	21597.1	19868.5	18193.7	377928	32152.2	19872.6	37121.8	30673.9	101547	16975.1	16480.3	17878.5	25676	14428.8	11255.7
1	10230.5	17957.1	12470.8	16733.1	14674.1	65021.9	47539.8	34809	25265.6	55190	73515.9	25190.5	94441.5	58113.8	21961.2	45455.1	24405.2	33317.3	227078	508742	59001.5	28671	63788.6	1.26507e+06	103378	37982.3	50007.5	27708.7	151524	90879	22316.5	20165.8	18562.9	416928	33192.5	19594.8	39890.6	30849.2	107867	17293.8	16418.1	18634.2	26839.5	14389.9	11124.8
1	3075.96	4074.8	3478.51	3870.75	4608.19	9268.95	8462.91	6564.19	5664.4	8342.39	11221.1	5624.03	12204.4	8613.72	5418.8	7484.41	6008.59	6453.13	23454.4	47449.2	15469	7281.76	9861.15	130375	14149.2	11756.6	8758.57	6849.04	16824.2	12235.4	7371.33	6773.69	6586.25	42500.3	8361.37	6563.88	8908.71	7892.86	17183.8	6145.17	6155.74	6294.52	10292.8	9718	7905.37
1	7243.24	9405.89	8172.62	9083.36	10527.7	20946.6	19487	14995.2	13011.4	19199.8	26555.5	13261.4	29048.5	21045.7	13420.3	18986.2	15331.3	16701	69799.4	148676	48893.3	20880.7	30039.1	492809	50195.2	43517.1	29106.1	21363.7	68193.4	45103.8	23172.8	20803.3	20044.3	188100	26719.8	19495.5	30844.5	26059.1	74902.6	17801.5	18060.7	19760.3	40859.6	33755.3	24239.1
1	10482	28166.7	11402.1	11219.8	8216.96	59894.1	33752.2	34308	16709	80965.1	71952.5	21449.8	113891	48742.2	15140.5	74462.3	19032.9	32571.7	179149	541833	50962.7	25426.1	104047	970727	96894.2	29318	87730.2	27220.4	102848	78984.3	21182.5	20749.3	17087.5	289393	29025.7	19168	32795.4	30508.6	103864	16015.6	24467.9	18010.2	46018.1	33546.5	21811.2
1	4967.02	9539.09	5409.34	5841.11	5909.36	21649.4	13315.7	14150.9	8902.12	34612.9	27254.9	11222.6	43566.2	20755.4	9716.9	34244	10301	15280.9	66034.7	181001	23118.9	13640.8	49100.3	338721	38239.2	16661.3	40146	14127.1	41135.5	34017	11959.6	12543.9	11061.9	116405	15878.1	11392.2	17547.3	16996.9	48493.1	10664.2	13937.7	11490.4	22115.6	15405.2	10270.5
1	5475.77	10404.7	6003.99	5790.19	5700.19	18642.1	14025.5	12829.5	7683.63	27394.1	27613.3	9951.85	34212	17351.7	8284.6	26670.7	12371.1	13584.5	58687.3	157269	40533.5	14374.1	42761	386839	41272.7	24502	40102.7	16196.9	48136.8	36617.5	16720.1	15159.4	13404.4	141674	19326.3	13523.4	21419.6	19818.1	63529.2	12726.4	17222.1	13496	29243.5	20894.6	12923.4
1	11646.6	31415.7	12841.8	13060.6	10773.6	57670.5	48202.6	35645	18693.4	75851.6	92689.2	23572.8	116461	51677	20340.6	69601.8	32815.5	33401.1	200111	547272	167027	41318.1	100414	1.21141e+06	129923	103170	95321.7	41979.6	153011	99766.5	44716.5	38234.2	34664.1	402288	45753.6	31418.7	54752.6	45612.8	168933	28074.6	38425.7	32148.6	85715.1	62949.9	40518.6
1	7370.12	11174.3	7907.94	7382.27	9227.99	18644.7	13939	11674	11120	23129.2	21650.5	11629.8	37257.8	14906.6	10646.3	21759.3	13094.8	14593.7	46290.2	105369	25020.3	15312.4	26604.4	250484	40854	20782.4	27968.2	22370.8	52948.5	42437.9	17831.1	18482.5	16887	73654.7	23425.1	22092.7	25698.2	24203.2	31830.6	16235.9	16580.8	16462.4	18812.8	16535.1	13018.8
1	8892.08	14839.9	9886.7	9306.05	11503.9	26627.4	19563.7	16556.9	15744.2	36370.9	34290	16945	62644.1	23853.8	15842.5	35178.2	20342	23960.3	86210.5	216082	45402.4	25715.8	49114.7	564453	84109.7	40802.4	56900	43131.2	125897	98800.9	34528.5	35048.7	31094.7	181139	45773.1	43194.3	53577.3	50785.2	77373.7	30718.4	31527.8	31320.1	41259.1	34729.2	26031.8
1	3642.73	5742.02	4208.67	4154.8	5340.69	10594	8900.44	7235.73	6118.51	15856.1	15363.1	7292.39	23792.5	9193.18	6706.74	14609.1	8687.17	9336.08	29527.5	60742	18231.2	9374.27	17500.1	148266	22599.1	12716.7	17377.8	11480.7	27106	22600.5	9533.29	9496.18	8817.01	39652.3	11697.8	9896.23	11760.3	11585.5	17365.1	7782.69	8058.89	8272.01	9873.11	8772.01	7057.37
1	4815.88	7037.5	5164.03	5226.31	6364.99	12689.9	9846.54	8475.7	7362.99	18742.9	17388.3	8725.92	27194.9	11202.1	7829.52	18021	10660	11980.3	36789.8	81992.7	20893.4	11602.9	23582.6	218989	30924.8	17923.8	24981.6	16477.8	43894	37832.4	13935.4	14241.5	12348.9	69670.4	17568.9	15647.5	19808.1	19400.9	30888.2	12225.6	12913.5	12704.2	16450.9	13616	10355.2
1	8143.57	10324.1	12067.4	16971.8	10183.5	49170.7	29177.2	45105.9	36202.7	68282.8	62064.4	28087.5	88597.8	115629	26002.7	64341.4	21651.9	42602.1	161596	630967	50394.3	44310.2	117750	538094	76261	85133.5	79888.2	18777	130415	205059	19642.9	23232.3	20563.1	166189	26128.6	15529.9	34543.6	60804.4	60207	15639.2	15487.6	17354.5	17012	11732.2	10001.6
1	6373.8	6866.28	7522.51	8072.95	9231.64	19076.4	15239.3	19389.9	16796.8	23266.9	24636.8	12975.7	30158.2	39242.2	12678.4	21680.5	11791.5	17624	52769.4	206227	21261	19184.9	35330	187396	32378.4	33573.3	28681.6	12180.2	56293.1	76576.1	12942.4	13522.4	12815.1	70899.5	16434	12066.5	20488.6	28929.3	29104.1	11109	11043.4	11967.2	11179.2	9042.41	8247.4
1	7538.93	11803.8	12477.8	21175.4	11242.9	56560.3	54574.5	58395.8	42217.8	69549.8	99052.2	29263.5	114495	129039	31720.7	58842.8	35137.4	41180.2	199007	669117	217348	55525.2	87034.3	563950	87823.2	108291	62356.7	18522.3	126522	160703	48986.8	28857.5	26429.8	141192	24506.9	13984.6	35353.8	53336.3	56235	14254	15466.4	19320.6	23812.2	15680.1	10638
1	6738.86	8769.06	9027.67	12036.9	9546.42	28398.5	26201.4	27932.1	22285.8	33945.2	46482.8	17852	54434.7	60906.8	19918.9	33591	19822.8	26155.6	106118	366185	99200.5	36831.9	56371.1	373556	64000.7	70566	46970.2	17370.2	100645	123729	34337.5	24804.9	24375	118803	24353.7	15788	33650	48515.3	52348.6	15093.5	16254.4	19278.2	23217.9	16570.2	11508.6
1	11237.8	16583.8	11036.9	10793.5	12380.9	47588.1	40019.2	29958.7	18248.3	68047.4	67917	20482.4	50454.8	35037.1	24286.1	62094.8	19571	28267.9	83183.2	291355	32752.3	41092.9	69086.2	472657	58801.1	72606.2	58997.2	22167.2	88605.1	78346.6	19900.8	26011.7	24291.3	169784	23921.2	18084.2	28546.6	29050.4	56201.1	15205.1	20706.9	15036.1	18004.7	11649.9	9857.91
1	15801.3	28956.9	14989.2	14343.7	11993.4	59507.7	49087	31468.1	17347.4	75526.5	87149	22401.8	66963.6	38346.2	25980.2	71437.2	22245.4	30492	114687	360514	42432.1	47458.4	83295.5	717826	81981.3	88356.7	68299.7	25165.7	132121	96267.9	22106.3	29722.9	27546.4	252546	28099.8	19137.9	35574.7	33752.1	83550	16614.4	26397	17713.1	25497	14043.4	11128.1
1	2874.99	3605.83	2721.62	2587.84	3128.53	6397.39	6447.06	4853.75	4152.06	8984.67	12949.7	4005.44	6038.85	6230.62	4411.19	10605.7	4733.51	5294.12	13132	29527.1	7461.86	7889.53	16253.3	61651.5	8734.77	15688.6	10547.1	5039.75	13061.8	14557	4997.51	6287.28	6097.68	35221.8	6235.71	4693.63	7325.98	8519.44	18997.8	4442.37	7713.93	5035.78	10197.2	7679.92	5187.21
1	7748.42	14802.5	7373.6	6981.11	6337.28	25446.5	35132.2	17799.5	13347.6	38960.4	80032.1	12019.6	28408.4	27232.9	14358.1	44288	19066.2	16518.5	74986.2	158303	51882	36060.3	61628.1	379611	43498	88047.7	41211.5	15694.5	69431.6	63004.2	19171.7	21656.8	21050.4	182626	17605.5	11290.7	26929.8	28005.4	85726.4	10612.2	25966.8	14544.8	40060.4	26159.6	14711
1	9740.03	14947.5	9420.32	9412.03	9016.25	29640.3	33867.5	21838.9	17032.8	44703.9	74952.3	14430.6	30195.6	32732.7	17762.8	53513.7	15422	20524.2	78391.6	198791	26929.5	40744.8	72857.2	390250	40426.5	89731.4	48183.8	16962.7	70186	76256.9	14169.7	22439.1	21978.3	196045	19470.4	13622.8	29404.2	35700.9	94447.2	12746.2	30257.2	16749.7	45509.5	31809.3	19313.6
1	16947.5	26543.4	17369.8	16139.9	18786	52685.3	61663.9	38381.3	37531.1	76513.9	119114	24801.2	48643.1	53258.4	30060.1	80747.4	24396.4	32127.9	107952	282711	40301.2	59775.2	97033.1	478571	55115.6	118483	64762.1	22536.5	80512.8	87012.6	19694.5	29483	28355.8	194179	24241.4	16964.1	30763.4	36921.6	82379.9	14565.4	28694.9	16812.2	37151	26927.7	17398.8
1	13684.4	24961.7	13587.7	12720.7	11735.4	54402.4	42724.1	30235.9	16091.4	80080.6	89623.8	23706.6	62442	38258.4	26406.4	78242.4	27092.8	34579.9	112917	375506	56678.4	50005.4	104945	769236	86646.9	100459	80462.7	32792.2	143811	122692	30406.5	37227.1	34413.9	318097	36075.8	26397.5	51443	53812	142812	22038.5	55115.9	29633.6	70099.9	48783.1	30089.7
1	7549.63	13426.1	8093.27	7953.78	7888.22	28276.2	24530.1	17401.7	10507.4	43792.6	52158.9	14907	37709	23444.8	17470.4	45528.7	17865.8	22252	70907.2	217522	36951.4	31761.4	63154.8	447306	54206.5	59243.3	46545.7	20650.3	84010.4	67709.1	19704.1	22695.4	21835.2	169497	23129.8	17320.6	31594	30916.5	76985.5	14874.4	30524.1	18902.2	40552.6	29532.4	18770.6
1	4047.14	5341.82	4452.48	4760.8	6187.88	10728.3	8969.63	8454.98	8197.42	12793.3	13251.1	8527.47	20414.9	11624.9	8006.33	11424.1	8433.61	10295.9	30774	51376.2	15319.3	10333.1	14109	144108	22734.2	12076.2	12606.5	11417.3	26326.4	16383.4	9723.68	9410.51	8747.69	35995.7	12821.7	10586.5	12782	11784	14514	9533.54	9040.01	9210.87	8855.09	8801.28	8085.85
1	7336.75	14578.9	8576.29	9368.47	8715.26	41712.4	27398.3	20273.3	15556.7	39572.3	44496.7	19107.1	78471.4	33599.8	17278.7	34765.4	18331.9	26203.7	145494	226464	62215.6	26897.5	54288.4	748961	112572	33993.2	45118.6	32338.2	155485	64768	25464.9	19992.8	17712.1	212573	37573.4	24269.9	40322.7	29931.7	68316.9	22825.6	18358.9	21841.4	21756.5	15115.1	11987.4
1	8468.91	19492.3	9987.18	11358.9	9867.07	55287.7	42910.2	26029.7	19312.3	52145	64900.7	24170.4	106311	42007.8	21847.7	42373	26163.6	32065.1	196583	299420	118449	39205.4	69246.6	1.13084e+06	152197	78386.2	62523.9	44313.3	212136	93561	43013.6	33866.3	30517.5	343292	53335.6	35001.7	68774.7	51001.7	142378	36947.7	33583.3	43979.7	56535.8	39142.3	25416.7
1	7996.55	21335.6	10037.1	11597.9	9181.47	65102.6	51836.5	28809.5	21118.6	65773.4	82519.2	26449	139475	48368.5	23701.9	50638.9	30018.5	34350.5	246354	345996	149399	43674.2	85990.6	1.36648e+06	189636	100659	76051.5	49028.7	253502	106957	50368.5	37185.5	32060.8	428413	61593.3	37522	78728.8	54717.1	166352	41453.8	37818.8	49359.7	53156.3	32747.1	18706.1
1	7511.12	11842.6	9350.43	11189.9	8208.12	46068.4	22562.1	27479.3	16387.1	40800.3	37833.6	21703.2	41284.8	46514	15054.3	31893.3	14612.9	27233.3	128892	373120	34117.8	24623.8	54883.6	786717	73661.8	40150.9	50187	22405.2	120917	135145	17147.9	18219.5	16682.5	287651	29689.5	21380.8	48476.7	65382.7	121283	20010	20166.8	29847.4	69456.2	62057.9	44724.6
1	4800.49	7002.27	5802.61	6789.28	6067.13	23550	12342.7	15001.3	10101.2	22069.4	19663	12929.9	22323	24345.7	9950.08	17715.1	9626.14	15545.6	59469.6	165390	18278.6	13900	27153.9	319405	32321.8	19246.8	22341.4	12059.4	45554.6	51264.1	10490.4	10564.1	10165.1	99190.9	15733.5	12179	20630.3	26341	43013.7	11744.2	11294.1	13673.2	24000.3	20376.5	14895.9
1	2536.71	4380.84	3693.63	4473.6	2947.35	22383.5	11073.8	12804.7	7493.31	24326.2	21299.6	11799.5	23727.2	25700.1	7972.62	20079.5	8586.8	16546.8	75681.5	215810	23750.1	12868.9	35738.9	445659	36657.3	21415.1	25993.7	10575.5	54057.7	64386.9	9716.97	8964.67	8278.82	134082	13419.3	9155.6	20557.6	29362.6	53581.2	8275.95	8399.3	11808.7	26879.5	18659.6	11872.9
1	688.113	1380.89	977	1348.22	768.498	6807.74	3972.6	3909.21	2146.36	6519.31	7002.59	2906.61	7782.51	7023.4	2065.24	4781.99	2498.94	3888.02	22732.5	57562.1	11918.3	3728.36	8006.12	132491	10899	7468.07	6198.83	2576.43	14759.3	15045.6	3324.56	2352.25	2022.82	35313.7	3343.28	2226.91	5031.38	6476.54	12756.5	2042.45	2076.45	2729.5	5749.35	3917.02	2452.92
1	3361.79	4020.75	3701.37	3831.3	4331.32	7946.73	6553.65	6194.85	4979.93	7657.5	8483.1	5759.32	12297.8	7560.74	5441.16	7571.08	5561.64	6650.88	22169	50462.1	9248.47	7023.7	11746.2	148388	14840.5	9476.94	10555.7	6893.33	23422.1	15942.6	6629.46	6608.32	6194.4	50364	8487.41	6945.2	9643.73	9433.58	22981	6576.42	7422.19	6886.81	12804.5	10910.1	8657.87
1	4098.14	6023.47	4832.73	5323.08	4965.37	15444.3	12116	10928.4	7268.3	16064.1	19494.5	9233.67	32792.7	15773.9	7577	14774.5	8304.54	11266	65273.6	163220	19142.5	12534.9	22713.8	464957	37335.8	17766.6	19775.1	9780.47	68041.9	39634.6	8271.3	8725.54	8096.14	142544	12083	8514.79	18026.7	16900.5	58695.1	8255.23	10843.9	10841.8	28911.3	22189.6	16116.4
1	2596.1	3667.15	2713.34	2933.74	2351.16	8907.97	8133.31	6206.34	3890.86	9301.92	14297.1	5925.92	21431.9	11236.3	5615.11	10636.3	7044.87	8975.4	58140.8	148880	40523.9	13698.2	20944.4	518442	40699.7	33682.8	21012	10591.7	72454.4	41313.6	13688.4	12382.4	12171.4	156945	13824	8766.9	19851.3	18703.4	69037.6	8220.04	10552.2	11817.9	38466.5	29866.5	21989
1	3733.97	8629.41	5911.76	6944.44	4471.21	24551.4	29294.7	17985.3	10195.4	24113.2	47891.7	14930.3	68274.7	28610.9	13014.6	21918.5	16208.4	18410.5	133605	281445	93210.1	28009.5	35090.9	873282	71643.6	74082.5	30910.7	16647.7	112569	54481.2	21201.2	20573.6	19475	211141	19662.1	11284.6	26025.2	21031.7	85263.9	10819.5	12688.1	14526.1	48104.6	35787.9	23701.9
1	7282.83	8888.68	9869.49	12167.1	11147.9	39530.4	28695.5	34359.8	51416.1	83685.8	59997.6	30542.6	137039	105260	48427.9	85176.6	29189.1	53049.7	198046	487637	114804	73090.2	168731	561169	191275	111601	136327	32053.4	252043	200736	47005.2	34806.4	35186.9	195636	72667.7	25538.3	88659.1	63398.4	75770.7	37966.2	17860.3	37383.8	19916.4	12892.3	10032.7
1	11377.1	14884.5	14766.5	18131.7	13029	44064.9	27720	40786.4	28074.5	48549.9	53655	23585.2	38413.4	75781.4	23573	48182	19929.1	33395.6	95509.5	303771	32842.7	34865.6	62821.4	295097	57003.4	56483.3	51379.7	17880.7	94991	86913.8	20263.8	21120	20428	112923	31124.8	18339	43048.9	34129.4	49333.4	19808.5	12414.8	21972.3	17082.8	11967.6	9979.82
1	12190	15286.7	15577.6	18489.9	16151.9	51477.5	36767.2	36275.1	45437.8	63431.1	57720.2	29282.7	107090	80646.8	43434.9	63453	31534.6	44682.3	155041	361385	121302	68946.3	123042	454291	170879	104347	111886	38955.2	225500	161432	60545.5	44441.4	44810.6	170057	76409.2	34887	96270	68842.8	82334.9	45977.4	26194.5	56923.7	39193.9	27373.7	18870.5
1	4714.41	6210.34	6268.85	7185.07	6982.56	17812.4	14634.8	12861.1	15567.6	20812.8	19621.8	10468.2	34048.6	25621	14546.5	20087.5	11363.9	14498.6	47136.5	108077	40705.3	21318.4	32774.5	125933	47097.2	29276.6	28995.1	11211.2	58627.5	41425.9	17843.6	12642.7	12889	41953.4	19988	10118	24602	17565.5	20770.5	12613.8	8012.55	15129.2	11196.8	8982.19	7177.32
1	5500.54	10389.2	6545.83	6759.15	7253.76	25448.4	13955.8	14169.6	10197.2	19776.8	29017.5	12132.6	23966.2	24195.6	10585.8	19603.3	12600.6	17874.6	61029.7	150785	25653.7	19244.3	26400.9	265379	69021.4	28123.9	22593.7	18627.7	128281	52869.9	16171.9	13543.5	13222.6	90833.7	29883.6	16969.8	51362.2	24091.2	41134.8	20713.6	17888.4	36935.1	19521.8	16481.7	12336.4
1	4726.47	6631.88	4957.11	4915.51	5698.24	14527.7	8709.52	8987.97	7125.01	12612.8	15662.4	8270.53	14620.4	14095.5	7942.4	13503.5	8981.83	11611	33198	78846	16453.1	12773.2	19729.1	136396	36689.8	16771.6	14779	11776.8	61367.6	27606.6	10653.1	9566.23	9376.3	45020.3	17586.6	11065.9	26536.3	14276.2	21687.2	12622.7	11049.2	19212.3	10730.2	9311.64	7540.19
1	4160.27	7553.33	4898.84	4697.57	4976.42	20541.7	11393.8	10699.8	6926.74	19217.1	25742.6	10134.5	21554.7	19649.9	9345.66	20707.2	12315.6	16519	59227.8	133614	32533.6	17846.7	34167.3	264411	61733.1	26891.1	24436.7	16446.2	111227	48085.6	16408.3	13475.4	12578.7	88083.8	26273.6	14336	47732.7	21522.3	40922.7	17824.2	16086.3	33770.3	15379.2	9754.4	6046.13
1	1942.07	3449.62	2149.71	2269.49	2999.07	7643.37	5490.43	4280.28	3341.52	5911.04	9137.74	3883.98	7371.35	7109.93	3665.01	5672.09	4515.04	5190.08	16051.1	37094.8	14404.6	6484.12	6969.24	62141.5	17566.2	10356.7	6914.49	5893.91	28418	12720.7	6795.3	6249.91	6063.94	20810.8	8698.23	5658.19	12505	6732.03	10027.1	6180.66	5189.89	8923.36	5372.73	4897.3	4123.34
0	2877.19	4002.39	3598.58	4133.32	4342.01	9314.79	8449.51	6831.36	6116.44	10643.9	11128.4	6170.87	25212.9	10604.8	11321.8	10565.7	6358.26	7930.91	53453.3	73295.6	24786	9294.49	17619.4	228796	28616.4	9486.27	13993	7513.31	27227.6	20011.7	7307.29	7312.7	6582.11	49902	9329.23	7601.74	10260.3	10706.7	21011.5	7215.99	7541.9	7667.55	13986.2	10382.9	7177.25
0	2778.38	3813.89	3363.14	3976.49	4287.32	8581.87	7853.71	6440.67	5777.64	9553.28	9583.59	5662.88	21267.4	9407.53	9985.26	9247.49	6020.84	7259.29	46269.1	66002.7	20959.4	8207.8	16072.7	204332	25283	8549.22	12887.4	6945.84	24244.3	18316.8	6558.35	6542.96	6073.59	45767.2	8715.91	7138.7	9452.45	10333.4	19292.5	6858.08	7031.41	7308.95	12795	9377.74	6788.42
0	2253.94	4796.52	3496.14	6152.85	3649.16	29909.2	26303.1	16008.1	11710.9	41693.8	43042.6	13419.9	104696	33997	34329	33662.4	15194	20530.9	228291	316762	103597	24089.7	67524.7	901607	110919	32491	57885.1	16446.5	120775	85143.2	15916.2	15903.7	12744	233731	19205.6	11280	24718	29781.9	74804.3	9193.85	9869.73	10964.2	28819.9	18805.9	11647.8
0	1577.29	3426.97	2494.36	4345.37	2413.78	21819.5	18556.2	11262.6	8524.89	30275.1	29940.9	9505.13	75875.1	23633.1	24134.3	23990.7	9757.24	13807.4	159008	218262	68960.6	15484.9	45327.1	609172	73875.2	20143.5	37666.7	10181.5	80552	56339.6	9573.92	10242.3	8077.36	154838	12339.1	7220.69	15906.5	19695	49622	5783.81	6538.88	7008.77	18436	12006.2	7230.75
0	5328.99	8707.27	7413.14	6801.95	6919.25	35604.1	14704.8	11642.4	9935.29	39077.8	19027.4	9666.69	40088.4	18970.8	9564	42909.7	10869	13148.3	57074.3	104132	24607.9	12829.5	63339.1	165212	38720.4	13768.4	60404.4	27258.6	42782.3	16891.4	12070.2	12200.3	11014.5	36053.5	14608.6	15153.6	15543.3	12567.5	14500.6	8621.94	8805.55	8704.76	11012	11280.5	9397.95
0	8535.56	15117.6	12519.1	11068.9	9335.72	68124.6	24402.8	18227.2	14795.3	65000.6	29144.6	13023.3	65667.7	30150.1	13517.3	68178.7	14788.7	18153	90899.6	171635	38572.6	18681.5	102382	273141	66505.6	19731.5	104742	43592.8	69424.6	23813.1	16639.3	16862.1	14379.4	61242.8	21641.1	23951.8	21464.7	18768.3	22967.4	11647.4	13075.6	12656	16990	18072.9	15020.4
0	3689.18	6272.8	5187.03	4830.17	3966.55	29303.1	11725.7	8886.44	6046.43	37551.2	17365.3	7571.86	36189.5	14900	7630.08	44711.1	10393.2	11979.9	58411.3	124299	27756	12500.1	80240.8	220490	45466	17753.2	84943.4	37415.2	58126.4	25053.5	14918.4	16834.7	14499.3	60581.3	18311.1	18483.6	19333.1	13963.5	21155.1	8809.37	9916.27	9605.18	12249.3	10129.2	7281.16
0	6233.96	12329.7	8896.37	8630.77	5933.45	57432.3	28100.6	16313.8	11022.1	64972.8	37672.4	11643.4	68347.7	27551.3	12603.7	74228.1	22465.2	19540.3	112108	236974	70188	23221.7	129988	422875	92022.2	37925.4	147575	71721	127709	42513.6	27965.7	31682	26653.1	114901	32840.9	35881.5	35613.8	25126	39064.4	14308.9	17243.1	16412.1	23516.3	19980.7	13860.5
[truncated: 114 more rows]
