# Supplementary material for: Prediction of gastric cancer by machine learning integrated with mass spectrometry-based N-glycomics
Source: Royal Society of Chemistry journal article supplement (doi:10.1039/d2an02057b), 2023-01-01
Supplement: d2an02057b2.pdf [file d2an02057b2.pdf]

# Supporting Information

## **Prediction of Gastric Cancer by Machine Learning Integrated with Mass Spectrometry-based *N*-glycomics**

*Deniz Baran Demirhan<sup>1</sup>, Hakan Yilmaz<sup>1</sup>, Harun Erol<sup>2</sup>, Hacı Mehmet Kayili<sup>1\*</sup> Bekir Salih<sup>3\*</sup>*

<sup>1</sup>Medical Engineering Department, Faculty of Engineering, Karabük University, 78000-Karabük, TURKEY.

<sup>2</sup>Pathology Department, Faculty of Medicine, Karabük University, 78000-Karabük, TURKEY.

<sup>3</sup>Chemistry Department, Faculty of Science, Hacettepe University, 06800-Ankara, TURKEY.

Corresponding Authors

\* [h.mehmetkayili@karabuk.edu.tr](mailto:h.mehmetkayili@karabuk.edu.tr) and [bekir@hacettepe.edu.tr](mailto:bekir@hacettepe.edu.tr)

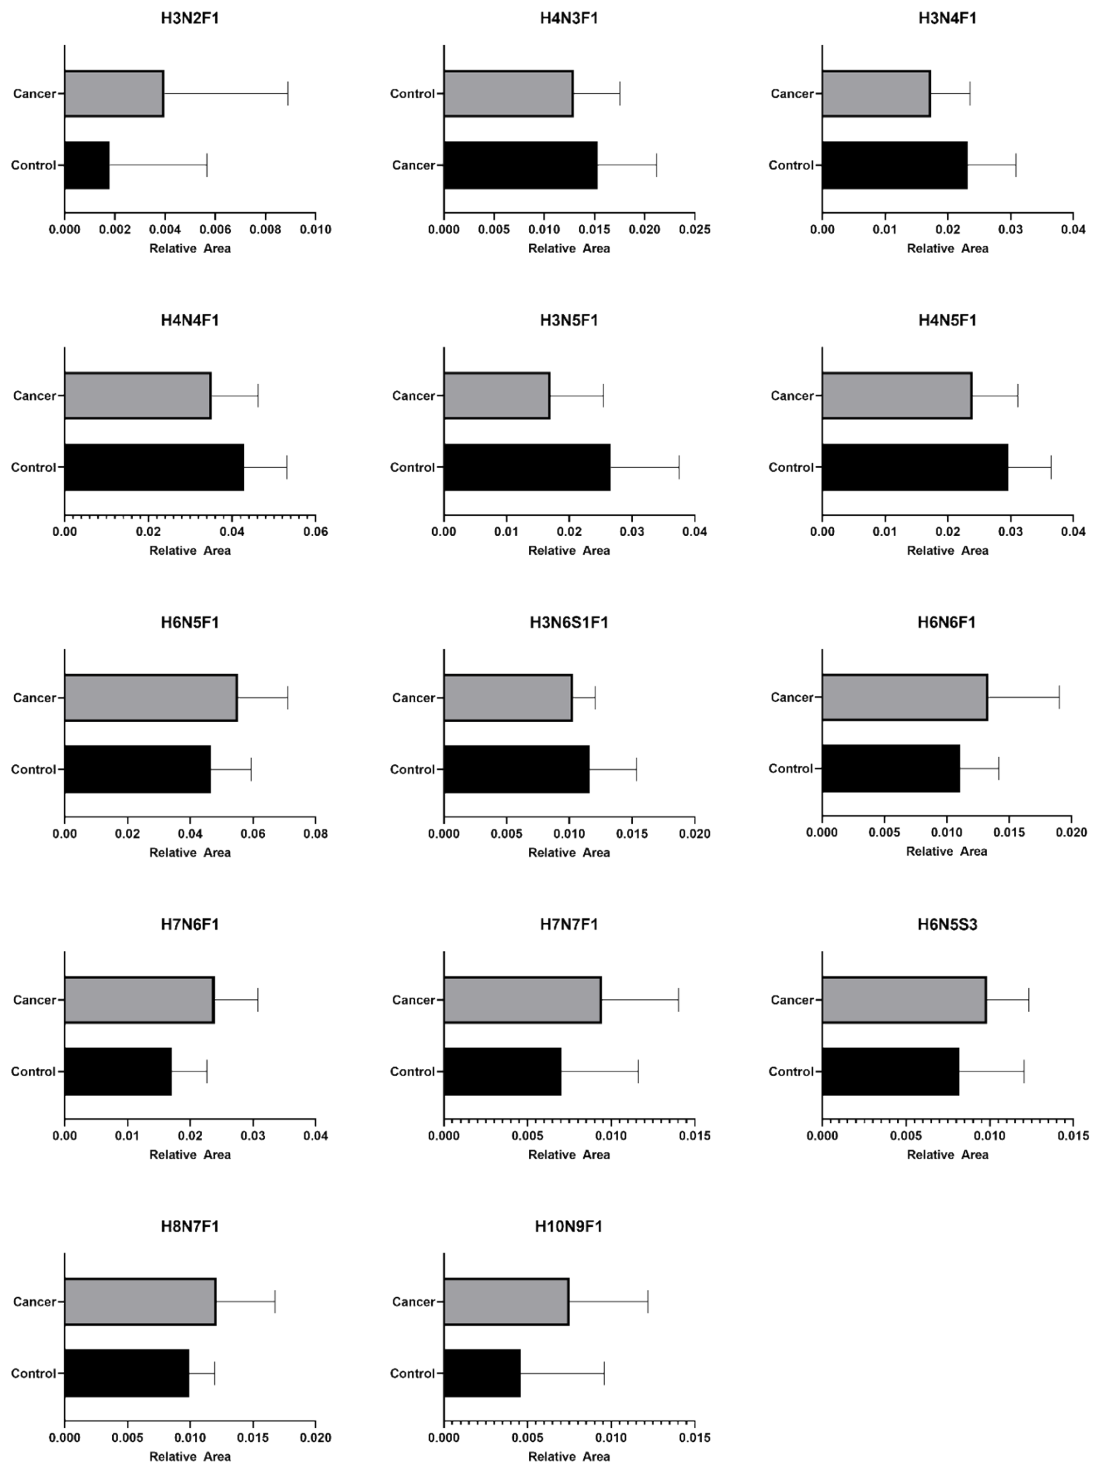

**Figure S1.** Box graph of differentially expressed *N*-glycans in gastric cancer.

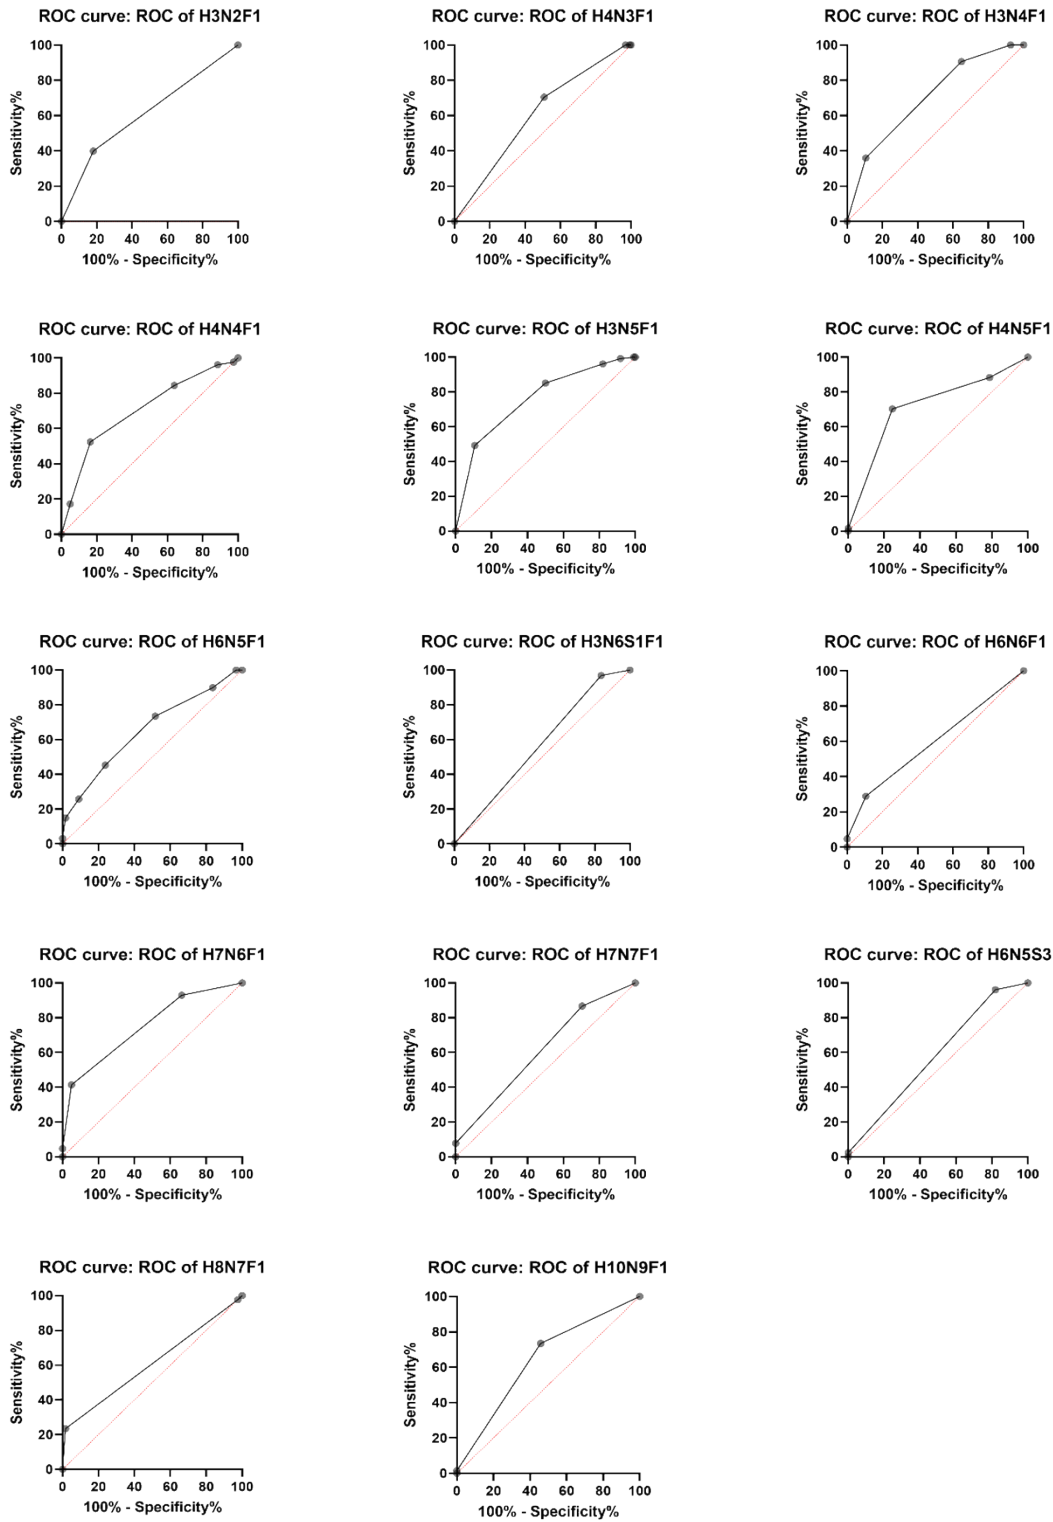

**Figure S2.** ROC curve analysis of differentially expressed N-glycans.

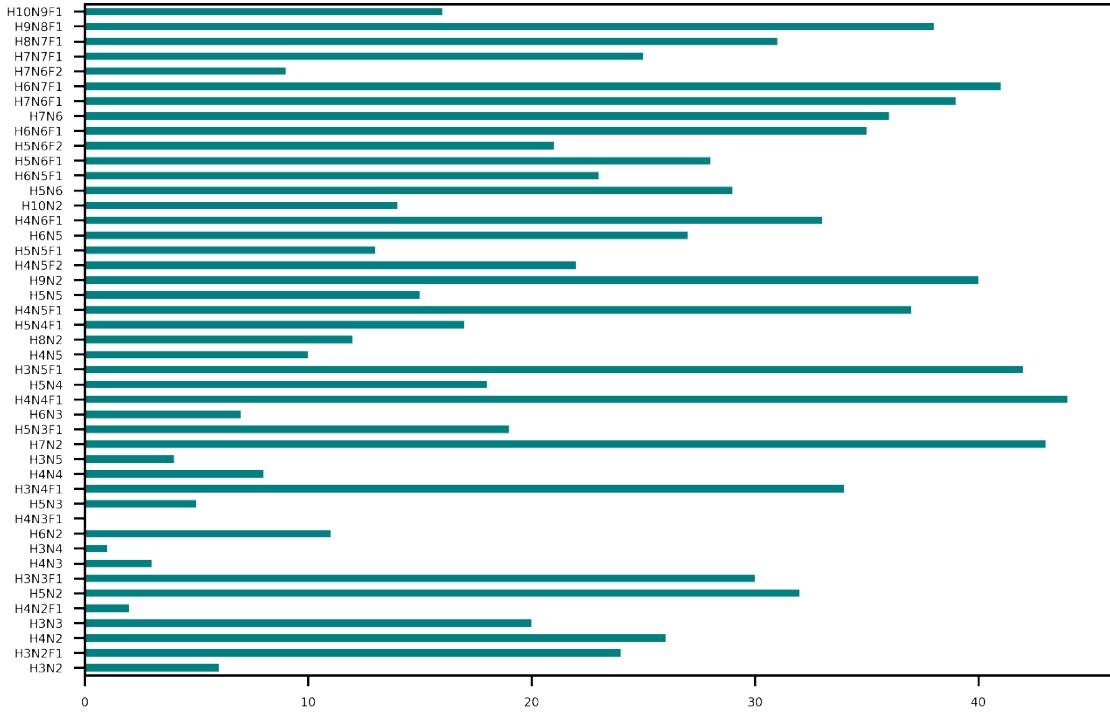

**Figure S3.** Fisher scores of the *N*-glycan dataset (relative area of neutral glycans).

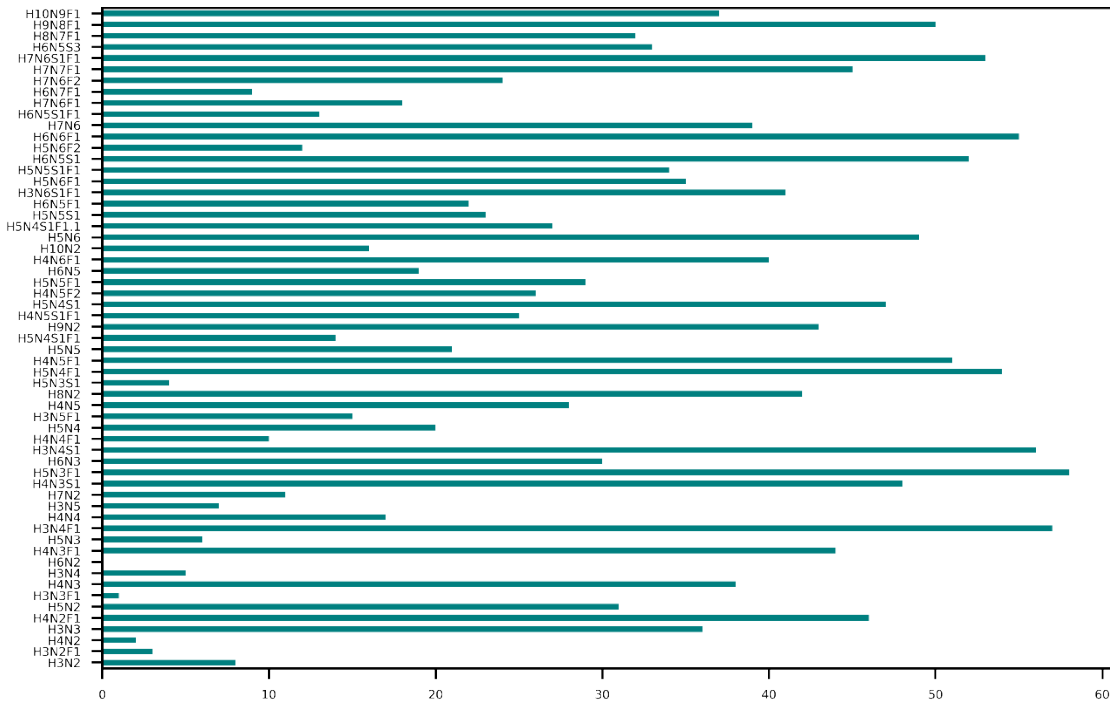

**Figure S4.** Fisher scores of the *N*-glycan dataset (relative area of whole glycans).

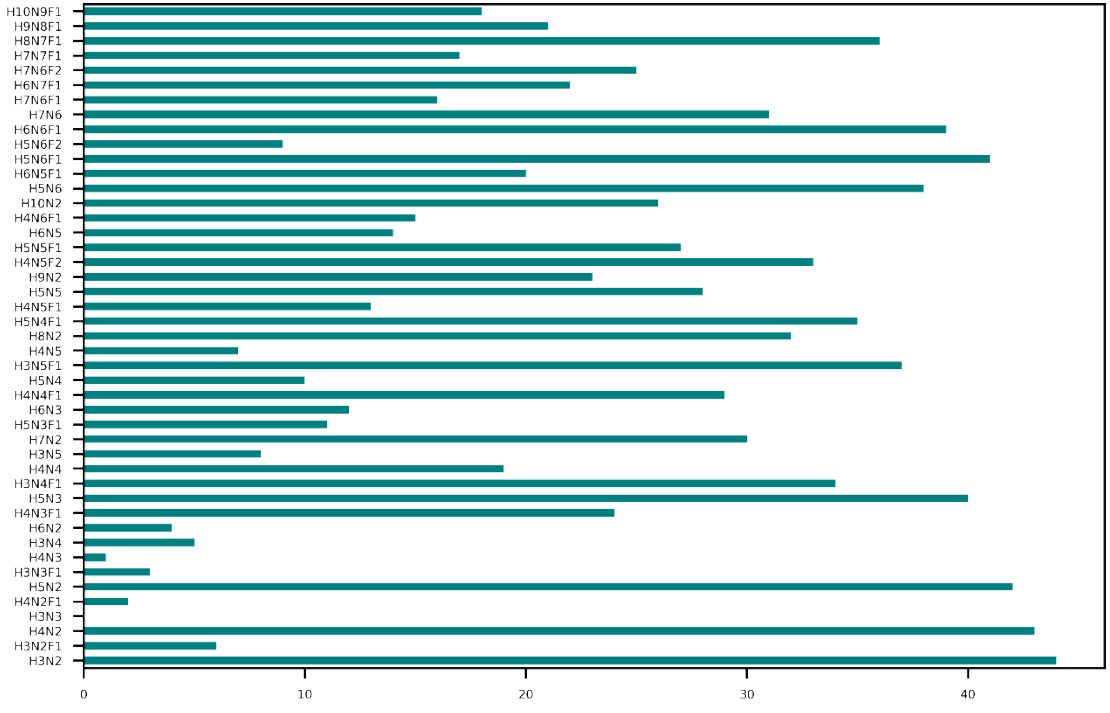

Figure S5. Fisher scores of the *N*-glycan dataset (analyte area of neutral glycans).

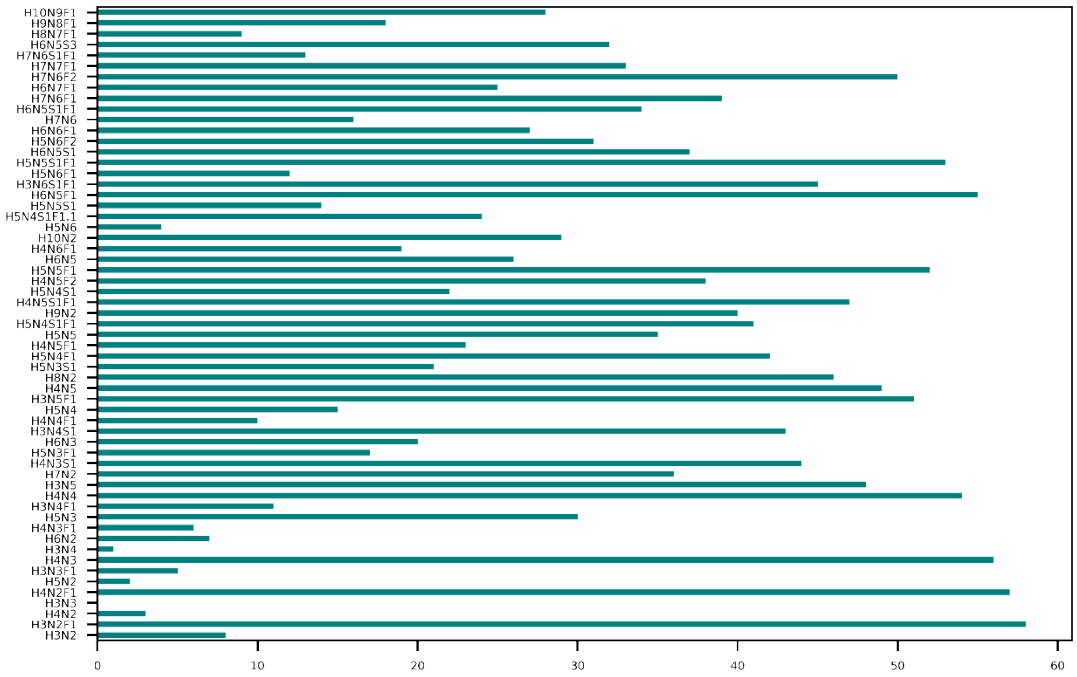

Figure S6. Fisher scores of the *N*-glycan dataset (analyte area of whole glycans).
